# Supplementary material for: The evolution and international spread of extensively drug resistant Shigella sonnei
Source: Research Square preprint supplement (doi:10.21203/rs.3.rs-2057516/v1), 2022-09-15
Supplement: Supplementary file 1 [file 4c2f31991af3c94e59724242.xlsx]

## Sheet: Sheet3
Continent of Travel	(Multiple Items)
Row Labels	Count of Name
No	1661
Yes	478
(blank)	603
Grand Total	2742

## Sheet: Isolates used in this study
Name	Year of Receipt	Sex	Age Group	Country of Isolation	Foreign Travel	Continent of Travel	SNP Address	Enterobase	Used in Figures	BAPS	Illumina Accession	Nanopore Accession	Assembly Accessions	BioProject	Genotype	Name	Confidence	t10	Is 1.1.1.1.377?	Is 3.6.1.1.2?	aadA5	aph(3")-lb/strA	aph(6)-ld/strB	blaTEM-1	blaCTX-M-27	qnrB19	erm(B)	mph(A)	sul1	sul2	tet(A)	dfrA1	dfrA17	sat2	qacE∆1	blaEC	acrF	emrD
SRR12323694	2020	F	< 16	England	Unknown	N/A	1.1.1.60.1992.2476.4016	Available	1		SRR12323694			PRJNA315192	3.6.2	Central Asia III	strong	1.1.1.60.1992	No	No
SRR10760844	2019	F	16 - 60	England	Yes	Africa	1.1.161.1051.1924.2373.3841	Available	1		SRR10760844			PRJNA315192	3.6	Central Asia III	strong	1.1.161.1051.1924	No	No
SRR12251255	2020	M	16 - 60	England	No	N/A	1.1.18.1081.1994.2479.4015	Available	1		SRR12251255			PRJNA315192	3.6.2	Central Asia III	strong	1.1.18.1081.1994	No	No
SRR12354742	2020	M	16 - 60	England	Unknown	N/A	1.1.18.1081.1994.2479.4015	Available	1		SRR12354742			PRJNA315192	3.6.2	Central Asia III	strong	1.1.18.1081.1994	No	No
SRR7215525	2016	F	16 - 60	England	Yes	Africa	1.1.18.26.1045.1156.1507	Available	1		SRR7215525			PRJNA315192	3.6.2	Central Asia III	strong	1.1.18.26.1045	No	No
SRR7244284	2016	M	16 - 60	England	No	N/A	1.1.18.26.1045.1156.1513	Available	1		SRR7244284			PRJNA315192	3.6.2	Central Asia III	strong	1.1.18.26.1045	No	No
SRR7249727	2016	F	16 - 60	England	Unknown	N/A	1.1.18.26.1045.1156.1513	Available	1		SRR7249727			PRJNA315192	3.6.2	Central Asia III	strong	1.1.18.26.1045	No	No
SRR7277797	2016	M	16 - 60	England	Yes	Africa	1.1.18.26.1045.1156.1504	Available	1		SRR7277797			PRJNA315192	3.6.2	Central Asia III	strong	1.1.18.26.1045	No	No
SRR7265945	2016	F	16 - 60	England	Yes	Asia	1.1.18.26.1059.1174.1530	Available	1		SRR7265945			PRJNA315192	3.6.2	Central Asia III	strong	1.1.18.26.1059	No	No
SRR7866077	2018	F	16 - 60	England	Yes	Africa	1.1.18.26.1578.1850.2802	Available	1		SRR7866077			PRJNA315192	3.6.2	Central Asia III	strong	1.1.18.26.1578	No	No
SRR8240409	2018	F	16 - 60	England	Yes	Africa	1.1.18.26.1578.1951.3003	Available	1		SRR8240409			PRJNA315192	3.6.2	Central Asia III	strong	1.1.18.26.1578	No	No
SRR10037861	2019	F	16 - 60	England	Yes	Africa	1.1.18.26.1634.1932.3475	Available	1		SRR10037861			PRJNA315192	3.6.2	Central Asia III	strong	1.1.18.26.1634	No	No
SRR10431628	2019	M	> 60	England	Unknown	N/A	1.1.18.26.1634.2324.3747	Available	1		SRR10431628			PRJNA315192	3.6.2	Central Asia III	strong	1.1.18.26.1634	No	No
SRR10513258	2019	M	> 60	England	Yes	Africa	1.1.18.26.1634.2324.3772	Available	1		SRR10513258			PRJNA315192	3.6.2	Central Asia III	strong	1.1.18.26.1634	No	No
SRR10527359	2019	F	> 60	England	No	N/A	1.1.18.26.1634.1932.3788	Available	1		SRR10527359			PRJNA315192	3.6.2	Central Asia III	strong	1.1.18.26.1634	No	No
SRR8176550	2018	Unknown	16 - 60	England	Yes	Africa	1.1.18.26.1634.1932.2965	Available	1		SRR8176550			PRJNA315192	3.6.2	Central Asia III	strong	1.1.18.26.1634	No	No
SRR9661223	2019	F	> 60	England	Unknown	N/A	1.1.18.26.1634.1932.3386	Available	1		SRR9661223			PRJNA315192	3.6.2	Central Asia III	strong	1.1.18.26.1634	No	No
SRR8240966	2018	F	16 - 60	England	Yes	Africa	1.1.18.26.1647.1952.3005	Available	1		SRR8240966			PRJNA315192	3.6.2	Central Asia III	strong	1.1.18.26.1647	No	No
SRR10452798	2019	F	16 - 60	England	Unknown	N/A	1.1.18.26.1898.2330.3755	Available	1		SRR10452798			PRJNA315192	3.6.2	Central Asia III	strong	1.1.18.26.1898	No	No
SRR12718013	2020	M	16 - 60	England	Unknown	N/A	1.1.18.26.1994.2479.4029	Available	1		SRR12718013			PRJNA315192	3.6.2	Central Asia III	strong	1.1.18.26.1994	No	No
SRR12775230	2020	M	16 - 60	England	Unknown	N/A	1.1.18.26.1994.2479.4029	Available	1		SRR12775230			PRJNA315192	3.6.2	Central Asia III	strong	1.1.18.26.1994	No	No
SRR12963009	2020	M	16 - 60	England	Unknown	N/A	1.1.18.26.1994.2479.4029	Available	1		SRR12963009			PRJNA315192	3.6.2	Central Asia III	strong	1.1.18.26.1994	No	No
SRR12963023	2020	F	> 60	England	Unknown	N/A	1.1.18.26.1994.2479.4029	Available	1		SRR12963023			PRJNA315192	3.6.2	Central Asia III	strong	1.1.18.26.1994	No	No
SRR13290204	2020	M	16 - 60	England	Unknown	N/A	1.1.18.26.1994.2479.4029	Available	1		SRR13290204			PRJNA315192	3.6.2	Central Asia III	strong	1.1.18.26.1994	No	No
SRR10397428	2019	M	16 - 60	England	Unknown	N/A	1.1.18.26.279.2147.3728	Available	1		SRR10397428			PRJNA315192	3.6.2	Central Asia III	strong	1.1.18.26.279	No	No
SRR4786784	2016	F	16 - 60	England	Yes	Africa	1.1.18.26.279.391.940	Available	1		SRR4786784			PRJNA315192	3.6.2	Central Asia III	strong	1.1.18.26.279	No	No
SRR4786926	2016	F	16 - 60	England	Yes	Asia	1.1.18.26.279.391.940	Available	1		SRR4786926			PRJNA315192	3.6.2	Central Asia III	strong	1.1.18.26.279	No	No
SRR4787199	2016	F	16 - 60	England	Yes	Asia	1.1.18.26.279.391.940	Available	1		SRR4787199			PRJNA315192	3.6.2	Central Asia III	strong	1.1.18.26.279	No	No
SRR4897305	2016	F	< 16	England	Yes	Africa	1.1.18.26.279.391.940	Available	1		SRR4897305			PRJNA315192	3.6.2	Central Asia III	strong	1.1.18.26.279	No	No
SRR5024286	2016	F	< 16	England	Yes	Africa	1.1.18.26.279.391.940	Available	1		SRR5024286			PRJNA315192	3.6.2	Central Asia III	strong	1.1.18.26.279	No	No
SRR7230340	2017	F	16 - 60	England	Yes	Africa	1.1.18.26.279.1412.2087	Available	1		SRR7230340			PRJNA315192	3.6.2	Central Asia III	strong	1.1.18.26.279	No	No
SRR7244313	2017	M	16 - 60	England	Yes	Asia	1.1.18.26.279.1412.1941	Available	1		SRR7244313			PRJNA315192	3.6.2	Central Asia III	strong	1.1.18.26.279	No	No
SRR7265953	2017	F	16 - 60	England	Yes	Africa	1.1.18.26.279.1412.2087	Available	1		SRR7265953			PRJNA315192	3.6.2	Central Asia III	strong	1.1.18.26.279	No	No
SRR7358308	2017	Unknown	16 - 60	England	Yes	North America	1.1.18.26.279.1412.1941	Available	1		SRR7358308			PRJNA315192	3.6.2	Central Asia III	strong	1.1.18.26.279	No	No
SRR7850027	2018	F	16 - 60	England	Yes	Africa	1.1.18.26.279.1412.2721	Available	1		SRR7850027			PRJNA315192	3.6.2	Central Asia III	strong	1.1.18.26.279	No	No
SRR7895987	2018	F	16 - 60	England	Yes	Africa	1.1.18.26.279.1862.2826	Available	1		SRR7895987			PRJNA315192	3.6.2	Central Asia III	strong	1.1.18.26.279	No	No
SRR8130972	2018	F	16 - 60	England	Unknown	N/A	1.1.18.26.279.1914.2932	Available	1		SRR8130972			PRJNA315192	3.6.2	Central Asia III	strong	1.1.18.26.279	No	No
SRR9595075	2019	F	16 - 60	England	Unknown	N/A	1.1.18.26.279.2147.3370	Available	1		SRR9595075			PRJNA315192	3.6.2	Central Asia III	strong	1.1.18.26.279	No	No
SRR10088449	2019	F	< 16	England	Yes	Asia	1.1.18.26.30.1476.3491	Available	1		SRR10088449			PRJNA315192	3.6.2	Central Asia III	strong	1.1.18.26.30	No	No
SRR10212223	2019	M	< 16	England	Unknown	N/A	1.1.18.26.30.1476.3564	Available	1		SRR10212223			PRJNA315192	3.6.2	Central Asia III	strong	1.1.18.26.30	No	No
SRR10231913	2019	F	< 16	England	Unknown	N/A	1.1.18.26.30.1476.3564	Available	1		SRR10231913			PRJNA315192	3.6.2	Central Asia III	strong	1.1.18.26.30	No	No
SRR10247336	2019	M	16 - 60	England	Unknown	N/A	1.1.18.26.30.1476.3677	Available	1		SRR10247336			PRJNA315192	3.6.2	Central Asia III	strong	1.1.18.26.30	No	No
SRR10380815	2019	F	16 - 60	England	Unknown	N/A	1.1.18.26.30.1476.3491	Available	1		SRR10380815			PRJNA315192	3.6.2	Central Asia III	strong	1.1.18.26.30	No	No
SRR10527360	2019	M	16 - 60	England	Yes	Africa	1.1.18.26.30.1476.3785	Available	1		SRR10527360			PRJNA315192	3.6.2	Central Asia III	strong	1.1.18.26.30	No	No
SRR7184342	2017	M	16 - 60	England	Yes	Europe	1.1.18.26.30.1476.2180	Available	1		SRR7184342			PRJNA315192	3.6.2	Central Asia III	strong	1.1.18.26.30	No	No
SRR7208780	2017	M	16 - 60	England	Unknown	N/A	1.1.18.26.30.1476.2049	Available	1		SRR7208780			PRJNA315192	3.6.2	Central Asia III	strong	1.1.18.26.30	No	No
SRR7230713	2017	M	16 - 60	England	Unknown	N/A	1.1.18.26.30.1476.2134	Available	1		SRR7230713			PRJNA315192	3.6.2	Central Asia III	strong	1.1.18.26.30	No	No
SRR7943897	2018	M	16 - 60	England	Yes	Africa	1.1.18.26.30.1476.2830	Available	1		SRR7943897			PRJNA315192	3.6.2	Central Asia III	strong	1.1.18.26.30	No	No
SRR8052184	2018	F	16 - 60	England	Yes	Africa	1.1.18.26.30.1476.2878	Available	1		SRR8052184			PRJNA315192	3.6.2	Central Asia III	strong	1.1.18.26.30	No	No
SRR4786133	2016	F	> 60	England	Yes	Unknown	1.1.18.26.620.686.926	Available	1		SRR4786133			PRJNA315192	3.6.2	Central Asia III	strong	1.1.18.26.620	No	No
SRR5024153	2016	M	< 16	England	Yes	Asia	1.1.18.26.620.686.1055	Available	1		SRR5024153			PRJNA315192	3.6.2	Central Asia III	strong	1.1.18.26.620	No	No
SRR7191707	2017	F	< 16	England	Yes	Africa	1.1.18.26.620.686.1987	Available	1		SRR7191707			PRJNA315192	3.6.2	Central Asia III	strong	1.1.18.26.620	No	No
SRR7251085	2016	F	16 - 60	England	Unknown	N/A	1.1.18.26.620.686.926	Available	1		SRR7251085			PRJNA315192	3.6.2	Central Asia III	strong	1.1.18.26.620	No	No
SRR7286474	2018	F	16 - 60	England	Unknown	N/A	1.1.18.26.620.1632.2378	Available	1		SRR7286474			PRJNA315192	3.6.2	Central Asia III	strong	1.1.18.26.620	No	No
SRR7286680	2017	F	16 - 60	England	Unknown	N/A	1.1.18.26.620.686.2135	Available	1		SRR7286680			PRJNA315192	3.6.2	Central Asia III	strong	1.1.18.26.620	No	No
SRR7367575	2018	M	16 - 60	England	Yes	Africa	1.1.18.26.620.1632.2403	Available	1		SRR7367575			PRJNA315192	3.6.2	Central Asia III	strong	1.1.18.26.620	No	No
SRR7407990	2017	F	< 16	England	Yes	Africa	1.1.18.26.620.1490.2072	Available	1		SRR7407990			PRJNA315192	3.6.2	Central Asia III	strong	1.1.18.26.620	No	No
SRR7416067	2018	F	16 - 60	England	Yes	Africa	1.1.18.26.620.1632.2378	Available	1		SRR7416067			PRJNA315192	3.6.2	Central Asia III	strong	1.1.18.26.620	No	No
SRR7826979	2018	F	16 - 60	England	Yes	Africa	1.1.18.26.620.1632.2758	Available	1		SRR7826979			PRJNA315192	3.6.2	Central Asia III	strong	1.1.18.26.620	No	No
SRR7832326	2018	M	16 - 60	England	Unknown	N/A	1.1.18.26.620.1632.2674	Available	1		SRR7832326			PRJNA315192	3.6.2	Central Asia III	strong	1.1.18.26.620	No	No
SRR7839323	2018	M	16 - 60	England	Yes	Africa	1.1.18.26.620.1632.2746	Available	1		SRR7839323			PRJNA315192	3.6.2	Central Asia III	strong	1.1.18.26.620	No	No
SRR7839329	2018	F	16 - 60	England	Yes	Africa	1.1.18.26.620.1632.2674	Available	1		SRR7839329			PRJNA315192	3.6.2	Central Asia III	strong	1.1.18.26.620	No	No
SRR7840869	2018	F	16 - 60	England	Yes	Africa	1.1.18.26.620.1632.2378	Available	1		SRR7840869			PRJNA315192	3.6.2	Central Asia III	strong	1.1.18.26.620	No	No
SRR7842096	2018	F	> 60	England	Unknown	N/A	1.1.18.26.620.1632.2674	Available	1		SRR7842096			PRJNA315192	3.6.2	Central Asia III	strong	1.1.18.26.620	No	No
SRR7842171	2018	F	16 - 60	England	Yes	Africa	1.1.18.26.620.1632.2668	Available	1		SRR7842171			PRJNA315192	3.6.2	Central Asia III	strong	1.1.18.26.620	No	No
SRR7842187	2018	M	16 - 60	England	Yes	Africa	1.1.18.26.620.1632.2378	Available	1		SRR7842187			PRJNA315192	3.6.2	Central Asia III	strong	1.1.18.26.620	No	No
SRR7850075	2018	F	16 - 60	England	Yes	Unknown	1.1.18.26.620.1632.2674	Available	1		SRR7850075			PRJNA315192	3.6.2	Central Asia III	strong	1.1.18.26.620	No	No
SRR7873476	2018	F	16 - 60	England	Unknown	N/A	1.1.18.26.620.1632.2801	Available	1		SRR7873476			PRJNA315192	3.6.2	Central Asia III	strong	1.1.18.26.620	No	No
SRR7889991	2018	M	16 - 60	England	No	N/A	1.1.18.26.620.1852.2807	Available	1		SRR7889991			PRJNA315192	3.6.2	Central Asia III	strong	1.1.18.26.620	No	No
SRR7890116	2018	F	16 - 60	England	No	N/A	1.1.18.26.620.1632.2808	Available	1		SRR7890116			PRJNA315192	3.6.2	Central Asia III	strong	1.1.18.26.620	No	No
SRR7943916	2018	F	16 - 60	England	Yes	Africa	1.1.18.26.620.1632.2834	Available	1		SRR7943916			PRJNA315192	3.6.2	Central Asia III	strong	1.1.18.26.620	No	No
SRR8086741	2018	F	16 - 60	England	Unknown	N/A	1.1.18.26.620.1902.2901	Available	1		SRR8086741			PRJNA315192	3.6.2	Central Asia III	strong	1.1.18.26.620	No	No
SRR8087181	2018	F	16 - 60	England	Yes	Africa	1.1.18.26.620.1897.2890	Available	1		SRR8087181			PRJNA315192	3.6.2	Central Asia III	strong	1.1.18.26.620	No	No
SRR8097461	2018	F	16 - 60	England	Unknown	N/A	1.1.18.26.620.1632.2897	Available	1		SRR8097461			PRJNA315192	3.6.2	Central Asia III	strong	1.1.18.26.620	No	No
SRR8097512	2018	F	< 16	England	Unknown	N/A	1.1.18.26.620.1632.2891	Available	1		SRR8097512			PRJNA315192	3.6.2	Central Asia III	strong	1.1.18.26.620	No	No
SRR8114776	2018	M	16 - 60	England	Yes	Africa	1.1.18.26.620.1632.2910	Available	1		SRR8114776			PRJNA315192	3.6.2	Central Asia III	strong	1.1.18.26.620	No	No
SRR8165818	2018	F	16 - 60	England	Yes	Africa	1.1.18.26.620.1926.2954	Available	1		SRR8165818			PRJNA315192	3.6.2	Central Asia III	strong	1.1.18.26.620	No	No
SRR8204013	2018	F	16 - 60	England	Yes	Africa	1.1.18.26.620.1942.2988	Available	1		SRR8204013			PRJNA315192	3.6.2	Central Asia III	strong	1.1.18.26.620	No	No
SRR8238025	2018	F	16 - 60	England	Yes	Africa	1.1.18.26.620.1632.2999	Available	1		SRR8238025			PRJNA315192	3.6.2	Central Asia III	strong	1.1.18.26.620	No	No
SRR8240404	2018	F	< 16	England	Unknown	N/A	1.1.18.26.620.1949.2998	Available	1		SRR8240404			PRJNA315192	3.6.2	Central Asia III	strong	1.1.18.26.620	No	No
SRR7291014	2016	F	16 - 60	England	Yes	North America	1.1.209.488.699.784.1084	Available	1		SRR7291014			PRJNA315192	3.6.2	Central Asia III	strong	1.1.209.488.699	No	No
SRR9678939	2019	F	16 - 60	England	Yes	Africa	1.1.29.1008.1784.2157.3392	Available	1		SRR9678939			PRJNA315192	3.6.3	Central Asia III	strong	1.1.29.1008.1784	No	No
SRR3531453	2016	F	< 16	England	Yes	North America	1.1.29.114.127.131.757	Available	1		SRR3531453			PRJNA315192	3.6.3	Central Asia III	strong	1.1.29.114.127	No	No
SRR4897047	2016	F	< 16	England	No	N/A	1.1.29.114.127.131.851	Available	1		SRR4897047			PRJNA315192	3.6.3	Central Asia III	strong	1.1.29.114.127	No	No
SRR4897544	2016	F	> 60	England	Yes	Asia	1.1.29.114.127.131.851	Available	1		SRR4897544			PRJNA315192	3.6.3	Central Asia III	strong	1.1.29.114.127	No	No
SRR5023897	2016	F	< 16	England	No	N/A	1.1.29.114.127.131.851	Available	1		SRR5023897			PRJNA315192	3.6.3	Central Asia III	strong	1.1.29.114.127	No	No
SRR4897525	2016	M	16 - 60	England	Yes	North America	1.1.29.268.353.672.907	Available	1		SRR4897525			PRJNA315192	3.6.3	Central Asia III	strong	1.1.29.268.353	No	No
SRR5024327	2016	F	< 16	England	Unknown	N/A	1.1.29.399.538.591.780	Available	1		SRR5024327			PRJNA315192	3.6.3	Central Asia III	strong	1.1.29.399.538	No	No
SRR4787192	2016	F	16 - 60	England	Yes	North America	1.1.29.424.575.635.847	Available	1		SRR4787192			PRJNA315192	3.6.3	Central Asia III	strong	1.1.29.424.575	No	No
SRR7282646	2016	F	16 - 60	England	No	N/A	1.1.29.49.1056.1169.1523	Available	1		SRR7282646			PRJNA315192	3.6.3	Central Asia III	strong	1.1.29.49.1056	No	No
SRR7286547	2017	M	< 16	England	No	N/A	1.1.29.49.1056.1169.1523	Available	1		SRR7286547			PRJNA315192	3.6.3	Central Asia III	strong	1.1.29.49.1056	No	No
SRR7266822	2016	M	16 - 60	England	Unknown	N/A	1.1.29.49.1083.1204.1576	Available	1		SRR7266822			PRJNA315192	3.6.3	Central Asia III	strong	1.1.29.49.1083	No	No
SRR8924445	2019	M	16 - 60	England	Yes	Asia	1.1.29.49.1083.2063.3233	Available	1		SRR8924445			PRJNA315192	3.6.3	Central Asia III	strong	1.1.29.49.1083	No	No
SRR7283761	2017	F	> 60	England	Yes	Africa	1.1.29.49.1084.1205.1577	Available	1		SRR7283761			PRJNA315192	3.6.3	Central Asia III	strong	1.1.29.49.1084	No	No
SRR7277003	2017	M	16 - 60	England	Unknown	N/A	1.1.29.49.1088.1213.1590	Available	1		SRR7277003			PRJNA315192	3.6.3	Central Asia III	strong	1.1.29.49.1088	No	No
SRR7191525	2017	F	16 - 60	England	Yes	North America	1.1.29.49.1093.1219.1599	Available	1		SRR7191525			PRJNA315192	3.6.3	Central Asia III	strong	1.1.29.49.1093	No	No
SRR7236584	2017	F	16 - 60	England	No	N/A	1.1.29.49.1101.1228.1622	Available	1		SRR7236584			PRJNA315192	3.6.3	Central Asia III	strong	1.1.29.49.1101	No	No
SRR7172271	2017	F	< 16	England	Unknown	N/A	1.1.29.49.1133.1294.1736	Available	1		SRR7172271			PRJNA315192	3.6.3	Central Asia III	strong	1.1.29.49.1133	No	No
SRR7184334	2017	M	> 60	England	Yes	Asia	1.1.29.49.1133.1275.1714	Available	1		SRR7184334			PRJNA315192	3.6.3	Central Asia III	strong	1.1.29.49.1133	No	No
SRR7204390	2017	M	> 60	England	Unknown	N/A	1.1.29.49.1133.1275.1714	Available	1		SRR7204390			PRJNA315192	3.6.3	Central Asia III	strong	1.1.29.49.1133	No	No
SRR7276894	2017	M	< 16	England	No	N/A	1.1.29.49.1133.1294.1736	Available	1		SRR7276894			PRJNA315192	3.6.3	Central Asia III	strong	1.1.29.49.1133	No	No
SRR7367219	2017	M	> 60	England	Unknown	N/A	1.1.29.49.1133.1275.1769	Available	1		SRR7367219			PRJNA315192	3.6.3	Central Asia III	strong	1.1.29.49.1133	No	No
SRR7283808	2017	F	< 16	England	Yes	Asia	1.1.29.49.1139.1282.1722	Available	1		SRR7283808			PRJNA315192	3.6.3	Central Asia III	strong	1.1.29.49.1139	No	No
SRR10212132	2019	M	< 16	England	Yes	Asia	1.1.29.49.1148.1296.3532	Available	1		SRR10212132			PRJNA315192	3.6.3	Central Asia III	strong	1.1.29.49.1148	No	No
SRR10228512	2019	F	< 16	England	Yes	Asia	1.1.29.49.1148.2246.3553	Available	1		SRR10228512			PRJNA315192	3.6.3	Central Asia III	strong	1.1.29.49.1148	No	No
SRR10228514	2019	M	< 16	England	Unknown	N/A	1.1.29.49.1148.2102.3575	Available	1		SRR10228514			PRJNA315192	3.6.3	Central Asia III	strong	1.1.29.49.1148	No	No
SRR10228517	2019	M	< 16	England	Yes	Asia	1.1.29.49.1148.1296.3555	Available	1		SRR10228517			PRJNA315192	3.6.3	Central Asia III	strong	1.1.29.49.1148	No	No
SRR10228554	2019	M	< 16	England	Unknown	N/A	1.1.29.49.1148.1296.3549	Available	1		SRR10228554			PRJNA315192	3.6.3	Central Asia III	strong	1.1.29.49.1148	No	No
SRR10236652	2019	F	16 - 60	England	No	N/A	1.1.29.49.1148.1296.3663	Available	1		SRR10236652			PRJNA315192	3.6.3	Central Asia III	strong	1.1.29.49.1148	No	No
SRR10247373	2019	M	16 - 60	England	Yes	Asia	1.1.29.49.1148.1493.3673	Available	1		SRR10247373			PRJNA315192	3.6.3	Central Asia III	strong	1.1.29.49.1148	No	No
SRR10397416	2019	M	< 16	England	Unknown	N/A	1.1.29.49.1148.2313.3733	Available	1		SRR10397416			PRJNA315192	3.6.3	Central Asia III	strong	1.1.29.49.1148	No	No
SRR10452817	2019	M	< 16	England	Unknown	N/A	1.1.29.49.1148.1296.3756	Available	1		SRR10452817			PRJNA315192	3.6.3	Central Asia III	strong	1.1.29.49.1148	No	No
SRR10491379	2019	F	< 16	England	Yes	Asia	1.1.29.49.1148.1296.3756	Available	1		SRR10491379			PRJNA315192	3.6.3	Central Asia III	strong	1.1.29.49.1148	No	No
SRR10527349	2019	M	< 16	England	Yes	Asia	1.1.29.49.1148.2349.3787	Available	1		SRR10527349			PRJNA315192	3.6.3	Central Asia III	strong	1.1.29.49.1148	No	No
SRR10799756	2019	F	16 - 60	England	Yes	Asia	1.1.29.49.1148.1296.3848	Available	1		SRR10799756			PRJNA315192	3.6.3	Central Asia III	strong	1.1.29.49.1148	No	No
SRR10806384	2019	F	< 16	England	Unknown	N/A	1.1.29.49.1148.2387.3853	Available	1		SRR10806384			PRJNA315192	3.6.3	Central Asia III	strong	1.1.29.49.1148	No	No
SRR10843863	2019	F	16 - 60	England	Unknown	N/A	1.1.29.49.1148.2393.3862	Available	1		SRR10843863			PRJNA315192	3.6.3	Central Asia III	strong	1.1.29.49.1148	No	No
SRR10858724	2019	F	16 - 60	England	No	N/A	1.1.29.49.1148.1296.3865	Available	1		SRR10858724			PRJNA315192	3.6.3	Central Asia III	strong	1.1.29.49.1148	No	No
SRR11016591	2020	M	< 16	England	Yes	Asia	1.1.29.49.1148.1296.3905	Available	1		SRR11016591			PRJNA315192	3.6.3	Central Asia III	strong	1.1.29.49.1148	No	No
SRR11048340	2020	F	< 16	England	Yes	Asia	1.1.29.49.1148.2423.3916	Available	1		SRR11048340			PRJNA315192	3.6.3	Central Asia III	strong	1.1.29.49.1148	No	No
SRR11048341	2020	M	16 - 60	England	No	N/A	1.1.29.49.1148.2424.3918	Available	1		SRR11048341			PRJNA315192	3.6.3	Central Asia III	strong	1.1.29.49.1148	No	No
SRR12109946	2020	M	> 60	England	Unknown	N/A	1.1.29.49.1148.2477.4012	Available	1		SRR12109946			PRJNA315192	3.6.3	Central Asia III	strong	1.1.29.49.1148	No	No
SRR12144664	2020	M	16 - 60	England	Unknown	N/A	1.1.29.49.1148.2477.4012	Available	1		SRR12144664			PRJNA315192	3.6.3	Central Asia III	strong	1.1.29.49.1148	No	No
SRR12594459	2020	M	16 - 60	England	Unknown	N/A	1.1.29.49.1148.2482.4026	Available	1		SRR12594459			PRJNA315192	3.6.3	Central Asia III	strong	1.1.29.49.1148	No	No
SRR12634814	2020	F	16 - 60	England	Yes	Asia	1.1.29.49.1148.1296.4028	Available	1		SRR12634814			PRJNA315192	3.6.3	Central Asia III	strong	1.1.29.49.1148	No	No
SRR7172263	2018	F	< 16	England	Yes	Asia	1.1.29.49.1148.1296.2282	Available	1		SRR7172263			PRJNA315192	3.6.3	Central Asia III	strong	1.1.29.49.1148	No	No
SRR7172287	2017	M	< 16	England	Yes	Asia	1.1.29.49.1148.1296.1991	Available	1		SRR7172287			PRJNA315192	3.6.3	Central Asia III	strong	1.1.29.49.1148	No	No
SRR7179835	2018	F	16 - 60	England	Yes	Asia	1.1.29.49.1148.1296.2329	Available	1		SRR7179835			PRJNA315192	3.6.3	Central Asia III	strong	1.1.29.49.1148	No	No
SRR7179896	2017	M	< 16	England	Yes	Asia	1.1.29.49.1148.1296.1749	Available	1		SRR7179896			PRJNA315192	3.6.3	Central Asia III	strong	1.1.29.49.1148	No	No
SRR7184320	2017	F	< 16	England	Yes	Asia	1.1.29.49.1148.1296.1772	Available	1		SRR7184320			PRJNA315192	3.6.3	Central Asia III	strong	1.1.29.49.1148	No	No
SRR7187800	2017	F	16 - 60	England	No	N/A	1.1.29.49.1148.1296.2033	Available	1		SRR7187800			PRJNA315192	3.6.3	Central Asia III	strong	1.1.29.49.1148	No	No
SRR7191736	2017	M	< 16	England	No	N/A	1.1.29.49.1148.1296.1991	Available	1		SRR7191736			PRJNA315192	3.6.3	Central Asia III	strong	1.1.29.49.1148	No	No
SRR7215479	2017	M	16 - 60	England	Unknown	N/A	1.1.29.49.1148.1296.1948	Available	1		SRR7215479			PRJNA315192	3.6.3	Central Asia III	strong	1.1.29.49.1148	No	No
SRR7221224	2018	M	< 16	England	Unknown	N/A	1.1.29.49.1148.1296.2282	Available	1		SRR7221224			PRJNA315192	3.6.3	Central Asia III	strong	1.1.29.49.1148	No	No
SRR7221230	2017	F	16 - 60	England	Unknown	N/A	1.1.29.49.1148.1296.2028	Available	1		SRR7221230			PRJNA315192	3.6.3	Central Asia III	strong	1.1.29.49.1148	No	No
SRR7223074	2017	M	> 60	England	Yes	Asia	1.1.29.49.1148.1296.1778	Available	1		SRR7223074			PRJNA315192	3.6.3	Central Asia III	strong	1.1.29.49.1148	No	No
SRR7230228	2017	M	16 - 60	England	No	N/A	1.1.29.49.1148.1296.1948	Available	1		SRR7230228			PRJNA315192	3.6.3	Central Asia III	strong	1.1.29.49.1148	No	No
SRR7236437	2018	M	16 - 60	England	Yes	Asia	1.1.29.49.1148.1296.2282	Available	1		SRR7236437			PRJNA315192	3.6.3	Central Asia III	strong	1.1.29.49.1148	No	No
SRR7236576	2017	F	> 60	England	Unknown	N/A	1.1.29.49.1148.1493.2079	Available	1		SRR7236576			PRJNA315192	3.6.3	Central Asia III	strong	1.1.29.49.1148	No	No
SRR7250946	2018	F	16 - 60	England	Yes	Asia	1.1.29.49.1148.1296.2325	Available	1		SRR7250946			PRJNA315192	3.6.3	Central Asia III	strong	1.1.29.49.1148	No	No
SRR7250954	2018	M	< 16	England	No	N/A	1.1.29.49.1148.1296.2363	Available	1		SRR7250954			PRJNA315192	3.6.3	Central Asia III	strong	1.1.29.49.1148	No	No
SRR7251002	2018	M	16 - 60	England	Yes	Asia	1.1.29.49.1148.1296.2368	Available	1		SRR7251002			PRJNA315192	3.6.3	Central Asia III	strong	1.1.29.49.1148	No	No
SRR7251445	2018	M	16 - 60	England	No	N/A	1.1.29.49.1148.1296.2280	Available	1		SRR7251445			PRJNA315192	3.6.3	Central Asia III	strong	1.1.29.49.1148	No	No
SRR7265853	2018	M	16 - 60	England	Yes	Asia	1.1.29.49.1148.1296.2352	Available	1		SRR7265853			PRJNA315192	3.6.3	Central Asia III	strong	1.1.29.49.1148	No	No
SRR7265971	2017	F	> 60	England	Unknown	N/A	1.1.29.49.1148.1542.2171	Available	1		SRR7265971			PRJNA315192	3.6.3	Central Asia III	strong	1.1.29.49.1148	No	No
SRR7274753	2018	M	< 16	England	Yes	Asia	1.1.29.49.1148.1296.2337	Available	1		SRR7274753			PRJNA315192	3.6.3	Central Asia III	strong	1.1.29.49.1148	No	No
SRR7285454	2017	F	< 16	England	No	N/A	1.1.29.49.1148.1296.2114	Available	1		SRR7285454			PRJNA315192	3.6.3	Central Asia III	strong	1.1.29.49.1148	No	No
SRR7285565	2018	F	16 - 60	England	No	N/A	1.1.29.49.1148.1296.2341	Available	1		SRR7285565			PRJNA315192	3.6.3	Central Asia III	strong	1.1.29.49.1148	No	No
SRR7286391	2018	M	< 16	England	No	N/A	1.1.29.49.1148.1296.2356	Available	1		SRR7286391			PRJNA315192	3.6.3	Central Asia III	strong	1.1.29.49.1148	No	No
SRR7286398	2017	M	< 16	England	Yes	Asia	1.1.29.49.1148.1296.1738	Available	1		SRR7286398			PRJNA315192	3.6.3	Central Asia III	strong	1.1.29.49.1148	No	No
SRR7291546	2018	F	< 16	England	Yes	Asia	1.1.29.49.1148.1296.2389	Available	1		SRR7291546			PRJNA315192	3.6.3	Central Asia III	strong	1.1.29.49.1148	No	No
SRR7291598	2018	M	16 - 60	England	Unknown	N/A	1.1.29.49.1148.1296.2351	Available	1		SRR7291598			PRJNA315192	3.6.3	Central Asia III	strong	1.1.29.49.1148	No	No
SRR7358264	2018	M	< 16	England	No	N/A	1.1.29.49.1148.1643.2399	Available	1		SRR7358264			PRJNA315192	3.6.3	Central Asia III	strong	1.1.29.49.1148	No	No
SRR7367472	2018	F	16 - 60	England	Unknown	N/A	1.1.29.49.1148.1296.2282	Available	1		SRR7367472			PRJNA315192	3.6.3	Central Asia III	strong	1.1.29.49.1148	No	No
SRR7407916	2018	F	< 16	England	No	N/A	1.1.29.49.1148.1643.2399	Available	1		SRR7407916			PRJNA315192	3.6.3	Central Asia III	strong	1.1.29.49.1148	No	No
SRR7416054	2018	F	> 60	England	Yes	Asia	1.1.29.49.1148.1296.2406	Available	1		SRR7416054			PRJNA315192	3.6.3	Central Asia III	strong	1.1.29.49.1148	No	No
SRR7416063	2018	F	16 - 60	England	No	N/A	1.1.29.49.1148.1643.2399	Available	1		SRR7416063			PRJNA315192	3.6.3	Central Asia III	strong	1.1.29.49.1148	No	No
SRR7474035	2018	F	< 16	England	No	N/A	1.1.29.49.1148.1296.2432	Available	1		SRR7474035			PRJNA315192	3.6.3	Central Asia III	strong	1.1.29.49.1148	No	No
SRR7500958	2018	F	< 16	England	Unknown	N/A	1.1.29.49.1148.1296.2282	Available	1		SRR7500958			PRJNA315192	3.6.3	Central Asia III	strong	1.1.29.49.1148	No	No
SRR7835330	2018	M	< 16	England	Unknown	N/A	1.1.29.49.1148.1832.2764	Available	1		SRR7835330			PRJNA315192	3.6.3	Central Asia III	strong	1.1.29.49.1148	No	No
SRR7836290	2018	F	16 - 60	England	Unknown	N/A	1.1.29.49.1148.1832.2777	Available	1		SRR7836290			PRJNA315192	3.6.3	Central Asia III	strong	1.1.29.49.1148	No	No
SRR7842200	2018	F	< 16	England	Unknown	N/A	1.1.29.49.1148.1832.2764	Available	1		SRR7842200			PRJNA315192	3.6.3	Central Asia III	strong	1.1.29.49.1148	No	No
SRR7850058	2018	F	16 - 60	England	Unknown	N/A	1.1.29.49.1148.1296.2728	Available	1		SRR7850058			PRJNA315192	3.6.3	Central Asia III	strong	1.1.29.49.1148	No	No
SRR7850125	2018	M	< 16	England	No	N/A	1.1.29.49.1148.1643.2399	Available	1		SRR7850125			PRJNA315192	3.6.3	Central Asia III	strong	1.1.29.49.1148	No	No
SRR7866254	2018	F	16 - 60	England	Unknown	N/A	1.1.29.49.1148.1296.2796	Available	1		SRR7866254			PRJNA315192	3.6.3	Central Asia III	strong	1.1.29.49.1148	No	No
SRR7895995	2018	F	< 16	England	No	N/A	1.1.29.49.1148.1296.2819	Available	1		SRR7895995			PRJNA315192	3.6.3	Central Asia III	strong	1.1.29.49.1148	No	No
SRR7943921	2018	F	< 16	England	Yes	Unknown	1.1.29.49.1148.1296.2832	Available	1		SRR7943921			PRJNA315192	3.6.3	Central Asia III	strong	1.1.29.49.1148	No	No
SRR7943922	2018	F	16 - 60	England	No	N/A	1.1.29.49.1148.1296.2829	Available	1		SRR7943922			PRJNA315192	3.6.3	Central Asia III	strong	1.1.29.49.1148	No	No
SRR7974366	2018	M	< 16	England	Yes	Asia	1.1.29.49.1148.1877.2849	Available	1		SRR7974366			PRJNA315192	3.6.3	Central Asia III	strong	1.1.29.49.1148	No	No
SRR7974368	2018	Unknown	< 16	England	Unknown	N/A	1.1.29.49.1148.1875.2847	Available	1		SRR7974368			PRJNA315192	3.6.3	Central Asia III	strong	1.1.29.49.1148	No	No
SRR7975989	2018	M	16 - 60	England	Unknown	N/A	1.1.29.49.1148.1296.2858	Available	1		SRR7975989			PRJNA315192	3.6.3	Central Asia III	strong	1.1.29.49.1148	No	No
SRR8052183	2018	M	16 - 60	England	Yes	Asia	1.1.29.49.1148.1296.2882	Available	1		SRR8052183			PRJNA315192	3.6.3	Central Asia III	strong	1.1.29.49.1148	No	No
SRR8105424	2018	M	> 60	England	Yes	Asia	1.1.29.49.1148.1296.2903	Available	1		SRR8105424			PRJNA315192	3.6.3	Central Asia III	strong	1.1.29.49.1148	No	No
SRR8238024	2018	F	< 16	England	Unknown	N/A	1.1.29.49.1148.1296.3000	Available	1		SRR8238024			PRJNA315192	3.6.3	Central Asia III	strong	1.1.29.49.1148	No	No
SRR8240974	2018	F	16 - 60	England	Yes	Asia	1.1.29.49.1148.1296.3002	Available	1		SRR8240974			PRJNA315192	3.6.3	Central Asia III	strong	1.1.29.49.1148	No	No
SRR8325550	2018	M	16 - 60	England	Yes	Asia	1.1.29.49.1148.1296.3056	Available	1		SRR8325550			PRJNA315192	3.6.3	Central Asia III	strong	1.1.29.49.1148	No	No
SRR8440732	2019	F	16 - 60	England	Yes	Asia	1.1.29.49.1148.1296.3109	Available	1		SRR8440732			PRJNA315192	3.6.3	Central Asia III	strong	1.1.29.49.1148	No	No
SRR8490597	2019	Unknown	16 - 60	England	Unknown	N/A	1.1.29.49.1148.1296.3123	Available	1		SRR8490597			PRJNA315192	3.6.3	Central Asia III	strong	1.1.29.49.1148	No	No
SRR8524572	2019	F	16 - 60	England	Yes	Asia	1.1.29.49.1148.1296.3144	Available	1		SRR8524572			PRJNA315192	3.6.3	Central Asia III	strong	1.1.29.49.1148	No	No
SRR8554751	2019	M	16 - 60	England	Unknown	N/A	1.1.29.49.1148.1296.3151	Available	1		SRR8554751			PRJNA315192	3.6.3	Central Asia III	strong	1.1.29.49.1148	No	No
SRR8715602	2019	F	16 - 60	England	Yes	Asia	1.1.29.49.1148.2040.3193	Available	1		SRR8715602			PRJNA315192	3.6.3	Central Asia III	strong	1.1.29.49.1148	No	No
SRR8863358	2019	F	< 16	England	Yes	Asia	1.1.29.49.1148.1296.3227	Available	1		SRR8863358			PRJNA315192	3.6.3	Central Asia III	strong	1.1.29.49.1148	No	No
SRR9007507	2019	F	16 - 60	England	Yes	Asia	1.1.29.49.1148.2083.3264	Available	1		SRR9007507			PRJNA315192	3.6.3	Central Asia III	moderate	1.1.29.49.1148	No	No
SRR9089361	2019	F	< 16	England	Yes	Asia	1.1.29.49.1148.1296.3298	Available	1		SRR9089361			PRJNA315192	3.6.3	Central Asia III	strong	1.1.29.49.1148	No	No
SRR9151835	2019	M	> 60	England	Yes	Asia	1.1.29.49.1148.1296.3308	Available	1		SRR9151835			PRJNA315192	3.6.3	Central Asia III	strong	1.1.29.49.1148	No	No
SRR9151839	2019	M	16 - 60	England	Unknown	N/A	1.1.29.49.1148.2111.3309	Available	1		SRR9151839			PRJNA315192	3.6.3	Central Asia III	strong	1.1.29.49.1148	No	No
SRR9151841	2019	F	16 - 60	England	Unknown	N/A	1.1.29.49.1148.1296.3306	Available	1		SRR9151841			PRJNA315192	3.6.3	Central Asia III	strong	1.1.29.49.1148	No	No
SRR9178558	2019	M	16 - 60	England	No	N/A	1.1.29.49.1148.2102.3295	Available	1		SRR9178558			PRJNA315192	3.6.3	Central Asia III	strong	1.1.29.49.1148	No	No
SRR9178567	2019	F	16 - 60	England	No	N/A	1.1.29.49.1148.2102.3295	Available	1		SRR9178567			PRJNA315192	3.6.3	Central Asia III	strong	1.1.29.49.1148	No	No
SRR9188443	2019	M	< 16	England	Yes	Asia	1.1.29.49.1148.1296.3322	Available	1		SRR9188443			PRJNA315192	3.6.3	Central Asia III	strong	1.1.29.49.1148	No	No
SRR9257912	2019	F	< 16	England	Unknown	N/A	1.1.29.49.1148.1296.3324	Available	1		SRR9257912			PRJNA315192	3.6.3	Central Asia III	strong	1.1.29.49.1148	No	No
SRR9260078	2019	M	< 16	England	Unknown	N/A	1.1.29.49.1148.1296.3324	Available	1		SRR9260078			PRJNA315192	3.6.3	Central Asia III	strong	1.1.29.49.1148	No	No
SRR9260888	2019	F	> 60	England	Yes	Asia	1.1.29.49.1148.2073.3333	Available	1		SRR9260888			PRJNA315192	3.6.3	Central Asia III	strong	1.1.29.49.1148	No	No
SRR9260988	2019	F	< 16	England	No	N/A	1.1.29.49.1148.1296.3324	Available	1		SRR9260988			PRJNA315192	3.6.3	Central Asia III	strong	1.1.29.49.1148	No	No
SRR9273284	2019	F	< 16	England	Unknown	N/A	1.1.29.49.1148.2126.3334	Available	1		SRR9273284			PRJNA315192	3.6.3	Central Asia III	strong	1.1.29.49.1148	No	No
SRR9306471	2019	F	< 16	England	Unknown	N/A	1.1.29.49.1148.1296.3349	Available	1		SRR9306471			PRJNA315192	3.6.3	Central Asia III	strong	1.1.29.49.1148	No	No
SRR9311800	2019	F	16 - 60	England	Unknown	N/A	1.1.29.49.1148.1296.3324	Available	1		SRR9311800			PRJNA315192	3.6.3	Central Asia III	strong	1.1.29.49.1148	No	No
SRR9595074	2019	M	< 16	England	Unknown	N/A	1.1.29.49.1148.1296.3324	Available	1		SRR9595074			PRJNA315192	3.6.3	Central Asia III	strong	1.1.29.49.1148	No	No
SRR9620979	2019	F	< 16	England	No	N/A	1.1.29.49.1148.2126.3382	Available	1		SRR9620979			PRJNA315192	3.6.3	Central Asia III	strong	1.1.29.49.1148	No	No
SRR9620984	2019	M	16 - 60	England	Yes	Asia	1.1.29.49.1148.1296.3349	Available	1		SRR9620984			PRJNA315192	3.6.3	Central Asia III	strong	1.1.29.49.1148	No	No
SRR9661219	2019	M	< 16	England	Unknown	N/A	1.1.29.49.1148.1296.3324	Available	1		SRR9661219			PRJNA315192	3.6.3	Central Asia III	strong	1.1.29.49.1148	No	No
SRR9678253	2019	F	< 16	England	Yes	Asia	1.1.29.49.1148.1296.3390	Available	1		SRR9678253			PRJNA315192	3.6.3	Central Asia III	strong	1.1.29.49.1148	No	No
SRR9719308	2019	F	16 - 60	England	Yes	Asia	1.1.29.49.1148.1296.3227	Available	1		SRR9719308			PRJNA315192	3.6.3	Central Asia III	strong	1.1.29.49.1148	No	No
SRR9825574	2019	M	16 - 60	England	Yes	Asia	1.1.29.49.1148.1296.3400	Available	1		SRR9825574			PRJNA315192	3.6.3	Central Asia III	strong	1.1.29.49.1148	No	No
SRR9836886	2019	F	16 - 60	England	Unknown	N/A	1.1.29.49.1148.1296.3306	Available	1		SRR9836886			PRJNA315192	3.6.3	Central Asia III	strong	1.1.29.49.1148	No	No
SRR9845589	2019	M	16 - 60	England	No	N/A	1.1.29.49.1148.2102.3412	Available	1		SRR9845589			PRJNA315192	3.6.3	Central Asia III	moderate	1.1.29.49.1148	No	No
SRR9861249	2019	F	16 - 60	England	No	N/A	1.1.29.49.1148.1296.3419	Available	1		SRR9861249			PRJNA315192	3.6.3	Central Asia III	strong	1.1.29.49.1148	No	No
SRR9874815	2019	M	16 - 60	England	Unknown	N/A	1.1.29.49.1148.2126.3420	Available	1		SRR9874815			PRJNA315192	3.6.3	Central Asia III	strong	1.1.29.49.1148	No	No
SRR9899923	2019	M	16 - 60	England	Yes	Asia	1.1.29.49.1148.2175.3425	Available	1		SRR9899923			PRJNA315192	3.6.3	Central Asia III	strong	1.1.29.49.1148	No	No
SRR9973704	2019	F	16 - 60	England	Unknown	N/A	1.1.29.49.1148.1296.2282	Available	1		SRR9973704			PRJNA315192	3.6.3	Central Asia III	strong	1.1.29.49.1148	No	No
SRR7285600	2017	F	< 16	England	Yes	Africa	1.1.29.49.1234.1414.1947	Available	1		SRR7285600			PRJNA315192	3.6.3	Central Asia III	strong	1.1.29.49.1234	No	No
SRR7236589	2017	F	> 60	England	Yes	Asia	1.1.29.49.1250.1432.1977	Available	1		SRR7236589			PRJNA315192	3.6.3	Central Asia III	strong	1.1.29.49.1250	No	No
SRR7187802	2017	M	< 16	England	Unknown	N/A	1.1.29.49.1252.1434.1982	Available	1		SRR7187802			PRJNA315192	3.6.3	Central Asia III	strong	1.1.29.49.1252	No	No
SRR7191568	2017	M	16 - 60	England	Unknown	N/A	1.1.29.49.1261.1449.2003	Available	1		SRR7191568			PRJNA315192	3.6.3	Central Asia III	strong	1.1.29.49.1261	No	No
SRR7283735	2017	F	16 - 60	England	Yes	Africa	1.1.29.49.1317.1521.2126	Available	1		SRR7283735			PRJNA315192	3.6.3	Central Asia III	strong	1.1.29.49.1317	No	No
SRR8440733	2019	M	16 - 60	England	Yes	Africa	1.1.29.49.1317.1999.3107	Available	1		SRR8440733			PRJNA315192	3.6.3	Central Asia III	strong	1.1.29.49.1317	No	No
SRR8737851	2019	M	16 - 60	England	Yes	Africa	1.1.29.49.1317.2041.3194	Available	1		SRR8737851			PRJNA315192	3.6.3	Central Asia III	strong	1.1.29.49.1317	No	No
SRR7184237	2017	F	16 - 60	England	Unknown	N/A	1.1.29.49.1318.1522.2127	Available	1		SRR7184237			PRJNA315192	3.6.3	Central Asia III	strong	1.1.29.49.1318	No	No
SRR7286567	2018	F	16 - 60	England	Yes	Asia	1.1.29.49.1352.1568.2226	Available	1		SRR7286567			PRJNA315192	3.6.3	Central Asia III	strong	1.1.29.49.1352	No	No
SRR7187040	2018	M	16 - 60	England	No	N/A	1.1.29.49.1357.1577.2247	Available	1		SRR7187040			PRJNA315192	3.6.3	Central Asia III	strong	1.1.29.49.1357	No	No
SRR7223107	2018	M	< 16	England	No	N/A	1.1.29.49.1361.1583.2266	Available	1		SRR7223107			PRJNA315192	3.6.3	Central Asia III	strong	1.1.29.49.1361	No	No
SRR7367526	2018	M	16 - 60	England	Unknown	N/A	1.1.29.49.1361.1583.2387	Available	1		SRR7367526			PRJNA315192	3.6.3	Central Asia III	strong	1.1.29.49.1361	No	No
SRR7184216	2018	M	16 - 60	England	Yes	Asia	1.1.29.49.1388.1616.2336	Available	1		SRR7184216			PRJNA315192	3.6.3	Central Asia III	strong	1.1.29.49.1388	No	No
SRR7290968	2018	M	< 16	England	Yes	Asia	1.1.29.49.1390.1618.2340	Available	1		SRR7290968			PRJNA315192	3.6.3	Central Asia III	strong	1.1.29.49.1390	No	No
SRR7501511	2018	M	16 - 60	England	Unknown	N/A	1.1.29.49.1420.1665.2442	Available	1		SRR7501511			PRJNA315192	3.6.3	Central Asia III	strong	1.1.29.49.1420	No	No
SRR7866227	2018	M	16 - 60	England	Yes	Unknown	1.1.29.49.1420.1654.2800	Available	1		SRR7866227			PRJNA315192	3.6.3	Central Asia III	strong	1.1.29.49.1420	No	No
SRR10219470	2019	F	16 - 60	England	Unknown	N/A	1.1.29.49.1533.2239.3543	Available	1		SRR10219470			PRJNA315192	3.6.3	Central Asia III	strong	1.1.29.49.1533	No	No
SRR10431617	2019	F	16 - 60	England	Unknown	N/A	1.1.29.49.1533.2322.3745	Available	1		SRR10431617			PRJNA315192	3.6.3	Central Asia III	strong	1.1.29.49.1533	No	No
SRR7588688	2018	F	16 - 60	England	Unknown	N/A	1.1.29.49.1533.1792.2646	Available	1		SRR7588688			PRJNA315192	3.6.3	Central Asia III	strong	1.1.29.49.1533	No	No
SRR7826984	2018	F	16 - 60	England	Unknown	N/A	1.1.29.49.1533.1792.2646	Available	1		SRR7826984			PRJNA315192	3.6.3	Central Asia III	strong	1.1.29.49.1533	No	No
SRR7842073	2018	F	16 - 60	England	Yes	Europe	1.1.29.49.1533.1792.2745	Available	1		SRR7842073			PRJNA315192	3.6.3	Central Asia III	strong	1.1.29.49.1533	No	No
SRR7850129	2018	M	16 - 60	England	Yes	Asia	1.1.29.49.1533.1792.2745	Available	1		SRR7850129			PRJNA315192	3.6.3	Central Asia III	strong	1.1.29.49.1533	No	No
SRR8086732	2018	F	16 - 60	England	Unknown	N/A	1.1.29.49.1533.1792.2888	Available	1		SRR8086732			PRJNA315192	3.6.3	Central Asia III	strong	1.1.29.49.1533	No	No
SRR8114775	2018	F	16 - 60	England	Yes	Asia	1.1.29.49.1533.1792.2888	Available	1		SRR8114775			PRJNA315192	3.6.3	Central Asia III	strong	1.1.29.49.1533	No	No
SRR8052167	2018	Unknown	16 - 60	England	Yes	Unknown	1.1.29.49.1610.1895.2881	Available	1		SRR8052167			PRJNA315192	3.6.3	Central Asia III	strong	1.1.29.49.1610	No	No
SRR8148870	2018	F	16 - 60	England	Yes	Africa	1.1.29.49.1620.1916.2937	Available	1		SRR8148870			PRJNA315192	3.6.3	Central Asia III	strong	1.1.29.49.1620	No	No
SRR8148956	2018	F	16 - 60	England	Yes	Africa	1.1.29.49.1623.1919.2940	Available	1		SRR8148956			PRJNA315192	3.6.3	Central Asia III	strong	1.1.29.49.1623	No	No
SRR10466998	2019	M	< 16	England	Unknown	N/A	1.1.29.49.1627.2332.3758	Available	1		SRR10466998			PRJNA315192	3.6.3	Central Asia III	strong	1.1.29.49.1627	No	No
SRR8166014	2018	M	< 16	England	Yes	Asia	1.1.29.49.1627.1924.2951	Available	1		SRR8166014			PRJNA315192	3.6.3	Central Asia III	strong	1.1.29.49.1627	No	No
SRR8176541	2018	M	16 - 60	England	Yes	Africa	1.1.29.49.1633.1931.2962	Available	1		SRR8176541			PRJNA315192	3.6.3	Central Asia III	strong	1.1.29.49.1633	No	No
SRR8325555	2018	F	< 16	England	Yes	Asia	1.1.29.49.1672.1980.3055	Available	1		SRR8325555			PRJNA315192	3.6.3	Central Asia III	strong	1.1.29.49.1672	No	No
SRR8418873	2018	M	< 16	England	No	N/A	1.1.29.49.1682.1994.3096	Available	1		SRR8418873			PRJNA315192	3.6.3	Central Asia III	strong	1.1.29.49.1682	No	No
SRR8440738	2019	M	16 - 60	England	Unknown	N/A	1.1.29.49.1687.2002.3113	Available	1		SRR8440738			PRJNA315192	3.6.3	Central Asia III	strong	1.1.29.49.1687	No	No
SRR9257748	2019	M	< 16	England	Yes	Asia	1.1.29.49.1741.2089.3274	Available	1		SRR9257748			PRJNA315192	3.6.3	Central Asia III	strong	1.1.29.49.1741	No	No
SRR10319756	2019	M	16 - 60	England	Unknown	N/A	1.1.29.49.1749.2301.3707	Available	1		SRR10319756			PRJNA315192	3.6.3	Central Asia III	strong	1.1.29.49.1749	No	No
SRR9083709	2019	F	16 - 60	England	Yes	Asia	1.1.29.49.1749.2099.3287	Available	1		SRR9083709			PRJNA315192	3.6.3	Central Asia III	strong	1.1.29.49.1749	No	No
SRR9151830	2019	M	16 - 60	England	Unknown	N/A	1.1.29.49.1749.2099.3287	Available	1		SRR9151830			PRJNA315192	3.6.3	Central Asia III	strong	1.1.29.49.1749	No	No
SRR9178562	2019	F	16 - 60	England	Unknown	N/A	1.1.29.49.1761.2117.3317	Available	1		SRR9178562			PRJNA315192	3.6.3	Central Asia III	strong	1.1.29.49.1761	No	No
SRR9188497	2019	M	< 16	England	Yes	Asia	1.1.29.49.1763.2120.3321	Available	1		SRR9188497			PRJNA315192	3.6.3	Central Asia III	strong	1.1.29.49.1763	No	No
SRR9586546	2019	M	16 - 60	England	Unknown	N/A	1.1.29.49.1778.2142.3362	Available	1		SRR9586546			PRJNA315192	3.6.3	Central Asia III	strong	1.1.29.49.1778	No	No
SRR9720381	2019	F	16 - 60	England	Unknown	N/A	1.1.29.49.1787.2162.3399	Available	1		SRR9720381			PRJNA315192	3.6.3	Central Asia III	strong	1.1.29.49.1787	No	No
SRR10049472	2019	F	> 60	England	Unknown	N/A	1.1.29.49.1816.2208.3480	Available	1		SRR10049472			PRJNA315192	3.6.3	Central Asia III	strong	1.1.29.49.1816	No	No
SRR10088476	2019	M	< 16	England	Yes	Asia	1.1.29.49.1823.2218.3493	Available	1		SRR10088476			PRJNA315192	3.6.3	Central Asia III	strong	1.1.29.49.1823	No	No
SRR10212129	2019	M	< 16	England	No	N/A	1.1.29.49.1833.2231.3529	Available	1		SRR10212129			PRJNA315192	3.6.3	Central Asia III	strong	1.1.29.49.1833	No	No
SRR10212224	2019	M	< 16	England	Yes	Asia	1.1.29.49.1835.2233.3534	Available	1		SRR10212224			PRJNA315192	3.6.3	Central Asia III	strong	1.1.29.49.1835	No	No
SRR10799755	2019	M	16 - 60	England	Unknown	N/A	1.1.29.49.1835.2233.3850	Available	1		SRR10799755			PRJNA315192	3.6.3	Central Asia III	strong	1.1.29.49.1835	No	No
SRR10397415	2019	F	< 16	England	Unknown	N/A	1.1.29.49.1888.2312.3732	Available	1		SRR10397415			PRJNA315192	3.6.3	Central Asia III	strong	1.1.29.49.1888	No	No
SRR10419841	2019	F	< 16	England	Unknown	N/A	1.1.29.49.1888.2312.3732	Available	1		SRR10419841			PRJNA315192	3.6.3	Central Asia III	strong	1.1.29.49.1888	No	No
SRR10491344	2019	F	< 16	England	No	N/A	1.1.29.49.1888.2312.3732	Available	1		SRR10491344			PRJNA315192	3.6.3	Central Asia III	strong	1.1.29.49.1888	No	No
SRR10397400	2019	M	< 16	England	Unknown	N/A	1.1.29.49.1891.2317.3738	Available	1		SRR10397400			PRJNA315192	3.6.3	Central Asia III	strong	1.1.29.49.1891	No	No
SRR10479290	2019	F	< 16	England	Unknown	N/A	1.1.29.49.1900.2334.3761	Available	1		SRR10479290			PRJNA315192	3.6.3	Central Asia III	strong	1.1.29.49.1900	No	No
SRR10666900	2019	M	16 - 60	England	No	N/A	1.1.29.49.1915.2362.3810	Available	1		SRR10666900			PRJNA315192	3.6.3	Central Asia III	strong	1.1.29.49.1915	No	No
SRR10806392	2019	M	16 - 60	England	Yes	Asia	1.1.29.49.1933.2388.3855	Available	1		SRR10806392			PRJNA315192	3.6.3	Central Asia III	strong	1.1.29.49.1933	No	No
SRR10985499	2020	M	16 - 60	England	Yes	Asia	1.1.29.49.1949.2412.3897	Available	1		SRR10985499			PRJNA315192	3.6.3	Central Asia III	strong	1.1.29.49.1949	No	No
SRR12826288	2020	F	16 - 60	England	Unknown	N/A	1.1.29.49.1998.2487.4037	Available	1		SRR12826288			PRJNA315192	3.6.3	Central Asia III	strong	1.1.29.49.1998	No	No
SRR12963019	2020	M	16 - 60	England	Yes	Asia	1.1.29.49.1998.2487.4040	Available	1		SRR12963019			PRJNA315192	3.6.3	Central Asia III	strong	1.1.29.49.1998	No	No
SRR13310629	2020	F	< 16	England	Unknown	N/A	1.1.29.49.2000.2491.4045	Available	1		SRR13310629			PRJNA315192	3.6.3	Central Asia III	strong	1.1.29.49.2000	No	No
SRR13340760	2020	F	< 16	England	Unknown	N/A	1.1.29.49.2000.2491.4045	Available	1		SRR13340760			PRJNA315192	3.6.3	Central Asia III	strong	1.1.29.49.2000	No	No
SRR3530622	2016	M	16 - 60	England	Yes	Asia	1.1.29.49.471.514.760	Available	1		SRR3530622			PRJNA315192	3.6.3	Central Asia III	strong	1.1.29.49.471	No	No
SRR4897241	2016	M	16 - 60	England	Yes	Asia	1.1.29.49.471.514.989	Available	1		SRR4897241			PRJNA315192	3.6.3	Central Asia III	strong	1.1.29.49.471	No	No
SRR5006338	2016	M	< 16	England	Yes	North America	1.1.29.49.471.514.834	Available	1		SRR5006338			PRJNA315192	3.6.3	Central Asia III	strong	1.1.29.49.471	No	No
SRR7172295	2018	M	16 - 60	England	No	N/A	1.1.29.49.471.1579.2254	Available	1		SRR7172295			PRJNA315192	3.6.3	Central Asia III	strong	1.1.29.49.471	No	No
SRR7191560	2017	M	16 - 60	England	Unknown	N/A	1.1.29.49.471.1446.1999	Available	1		SRR7191560			PRJNA315192	3.6.3	Central Asia III	strong	1.1.29.49.471	No	No
SRR7266777	2017	F	< 16	England	Unknown	N/A	1.1.29.49.471.514.1588	Available	1		SRR7266777			PRJNA315192	3.6.3	Central Asia III	strong	1.1.29.49.471	No	No
SRR4786911	2016	F	16 - 60	England	Unknown	N/A	1.1.29.49.491.538.694	Available	1		SRR4786911			PRJNA315192	3.6.3	Central Asia III	strong	1.1.29.49.491	No	No
SRR4787354	2016	M	16 - 60	England	Unknown	N/A	1.1.29.49.502.550.709	Available	1		SRR4787354			PRJNA315192	3.6.3	Central Asia III	strong	1.1.29.49.502	No	No
SRR3530427	2016	F	< 16	England	No	N/A	1.1.29.49.510.558.725	Available	1		SRR3530427			PRJNA315192	3.6.3	Central Asia III	strong	1.1.29.49.510	No	No
SRR4788283	2016	M	< 16	England	Unknown	N/A	1.1.29.49.510.558.884	Available	1		SRR4788283			PRJNA315192	3.6.3	Central Asia III	strong	1.1.29.49.510	No	No
SRR5006420	2016	M	< 16	England	No	N/A	1.1.29.49.510.558.884	Available	1		SRR5006420			PRJNA315192	3.6.3	Central Asia III	strong	1.1.29.49.510	No	No
SRR7215935	2017	F	< 16	England	Unknown	N/A	1.1.29.49.510.1262.1688	Available	1		SRR7215935			PRJNA315192	3.6.3	Central Asia III	strong	1.1.29.49.510	No	No
SRR7286463	2016	F	16 - 60	England	No	N/A	1.1.29.49.510.1197.1568	Available	1		SRR7286463			PRJNA315192	3.6.3	Central Asia III	strong	1.1.29.49.510	No	No
SRR3530632	2016	F	< 16	England	Unknown	N/A	1.1.29.49.512.561.824	Available	1		SRR3530632			PRJNA315192	3.6.3	Central Asia III	strong	1.1.29.49.512	No	No
SRR4787188	2016	M	16 - 60	England	No	N/A	1.1.29.49.512.561.730	Available	1		SRR4787188			PRJNA315192	3.6.3	Central Asia III	strong	1.1.29.49.512	No	No
SRR4897055	2016	F	< 16	England	Yes	Asia	1.1.29.49.512.561.730	Available	1		SRR4897055			PRJNA315192	3.6.3	Central Asia III	strong	1.1.29.49.512	No	No
SRR4897217	2016	F	16 - 60	England	Unknown	N/A	1.1.29.49.512.561.730	Available	1		SRR4897217			PRJNA315192	3.6.3	Central Asia III	strong	1.1.29.49.512	No	No
SRR7191646	2017	F	< 16	England	Unknown	N/A	1.1.29.49.512.1436.1984	Available	1		SRR7191646			PRJNA315192	3.6.3	Central Asia III	strong	1.1.29.49.512	No	No
SRR3531075	2016	F	< 16	England	No	N/A	1.1.29.49.540.593.782	Available	1		SRR3531075			PRJNA315192	3.6.3	Central Asia III	strong	1.1.29.49.540	No	No
SRR10049395	2019	F	< 16	England	Yes	Asia	1.1.29.49.547.2210.3483	Available	1		SRR10049395			PRJNA315192	3.6.3	Central Asia III	strong	1.1.29.49.547	No	No
SRR10198850	2019	F	< 16	England	Yes	Asia	1.1.29.49.547.1936.3524	Available	1		SRR10198850			PRJNA315192	3.6.3	Central Asia III	strong	1.1.29.49.547	No	No
SRR10212151	2019	M	16 - 60	England	Unknown	N/A	1.1.29.49.547.603.3562	Available	1		SRR10212151			PRJNA315192	3.6.3	Central Asia III	strong	1.1.29.49.547	No	No
SRR10228169	2019	M	> 60	England	Unknown	N/A	1.1.29.49.547.1936.3686	Available	1		SRR10228169			PRJNA315192	3.6.3	Central Asia III	strong	1.1.29.49.547	No	No
SRR10270580	2019	F	16 - 60	England	Yes	Asia	1.1.29.49.547.2106.3680	Available	1		SRR10270580			PRJNA315192	3.6.3	Central Asia III	strong	1.1.29.49.547	No	No
SRR11885016	2020	F	< 16	England	Yes	Asia	1.1.29.49.547.2472.4004	Available	1		SRR11885016			PRJNA315192	3.6.3	Central Asia III	strong	1.1.29.49.547	No	No
SRR11885019	2020	F	> 60	England	Unknown	N/A	1.1.29.49.547.2474.4006	Available	1		SRR11885019			PRJNA315192	3.6.3	Central Asia III	strong	1.1.29.49.547	No	No
SRR13153593	2020	F	< 16	England	Unknown	N/A	1.1.29.49.547.2489.4042	Available	1		SRR13153593			PRJNA315192	3.6.3	Central Asia III	strong	1.1.29.49.547	No	No
SRR3530646	2016	M	16 - 60	England	Yes	Asia	1.1.29.49.547.603.796	Available	1		SRR3530646			PRJNA315192	3.6.3	Central Asia III	strong	1.1.29.49.547	No	No
SRR4787270	2016	M	< 16	England	Yes	North America	1.1.29.49.547.603.846	Available	1		SRR4787270			PRJNA315192	3.6.3	Central Asia III	strong	1.1.29.49.547	No	No
SRR4787874	2016	F	16 - 60	England	No	N/A	1.1.29.49.547.603.910	Available	1		SRR4787874			PRJNA315192	3.6.3	Central Asia III	strong	1.1.29.49.547	No	No
SRR4897294	2016	F	> 60	England	Unknown	N/A	1.1.29.49.547.603.840	Available	1		SRR4897294			PRJNA315192	3.6.3	Central Asia III	strong	1.1.29.49.547	No	No
SRR4897684	2016	M	< 16	England	Yes	North America	1.1.29.49.547.603.846	Available	1		SRR4897684			PRJNA315192	3.6.3	Central Asia III	strong	1.1.29.49.547	No	No
SRR4897738	2016	F	16 - 60	England	Unknown	N/A	1.1.29.49.547.603.986	Available	1		SRR4897738			PRJNA315192	3.6.3	Central Asia III	strong	1.1.29.49.547	No	No
SRR4897759	2016	M	< 16	England	Yes	Asia	1.1.29.49.547.603.843	Available	1		SRR4897759			PRJNA315192	3.6.3	Central Asia III	strong	1.1.29.49.547	No	No
SRR7170920	2018	M	16 - 60	England	Unknown	N/A	1.1.29.49.547.1303.2271	Available	1		SRR7170920			PRJNA315192	3.6.3	Central Asia III	strong	1.1.29.49.547	No	No
SRR7170921	2018	F	16 - 60	England	Unknown	N/A	1.1.29.49.547.1303.2271	Available	1		SRR7170921			PRJNA315192	3.6.3	Central Asia III	strong	1.1.29.49.547	No	No
SRR7170922	2018	F	16 - 60	England	Unknown	N/A	1.1.29.49.547.1303.2271	Available	1		SRR7170922			PRJNA315192	3.6.3	Central Asia III	strong	1.1.29.49.547	No	No
SRR7170923	2017	M	< 16	England	Unknown	N/A	1.1.29.49.547.1303.1861	Available	1		SRR7170923			PRJNA315192	3.6.3	Central Asia III	strong	1.1.29.49.547	No	No
SRR7170924	2017	M	> 60	England	Yes	Asia	1.1.29.49.547.1303.1777	Available	1		SRR7170924			PRJNA315192	3.6.3	Central Asia III	strong	1.1.29.49.547	No	No
SRR7170925	2017	F	16 - 60	England	No	N/A	1.1.29.49.547.1303.1750	Available	1		SRR7170925			PRJNA315192	3.6.3	Central Asia III	strong	1.1.29.49.547	No	No
SRR7170926	2018	M	< 16	England	Unknown	N/A	1.1.29.49.547.1303.2314	Available	1		SRR7170926			PRJNA315192	3.6.3	Central Asia III	strong	1.1.29.49.547	No	No
SRR7170928	2018	M	16 - 60	England	Unknown	N/A	1.1.29.49.547.1303.2271	Available	1		SRR7170928			PRJNA315192	3.6.3	Central Asia III	strong	1.1.29.49.547	No	No
SRR7170929	2018	M	16 - 60	England	Unknown	N/A	1.1.29.49.547.1303.2271	Available	1		SRR7170929			PRJNA315192	3.6.3	Central Asia III	strong	1.1.29.49.547	No	No
SRR7170930	2018	M	16 - 60	England	Unknown	N/A	1.1.29.49.547.1303.2296	Available	1		SRR7170930			PRJNA315192	3.6.3	Central Asia III	strong	1.1.29.49.547	No	No
SRR7170932	2018	F	16 - 60	England	Yes	Asia	1.1.29.49.547.1303.2271	Available	1		SRR7170932			PRJNA315192	3.6.3	Central Asia III	strong	1.1.29.49.547	No	No
SRR7170933	2017	F	< 16	England	Unknown	N/A	1.1.29.49.547.1303.2031	Available	1		SRR7170933			PRJNA315192	3.6.3	Central Asia III	strong	1.1.29.49.547	No	No
SRR7170934	2018	F	16 - 60	England	Unknown	N/A	1.1.29.49.547.1303.2281	Available	1		SRR7170934			PRJNA315192	3.6.3	Central Asia III	strong	1.1.29.49.547	No	No
SRR7170935	2018	M	16 - 60	England	Yes	Unknown	1.1.29.49.547.1303.2271	Available	1		SRR7170935			PRJNA315192	3.6.3	Central Asia III	strong	1.1.29.49.547	No	No
SRR7170936	2018	M	16 - 60	England	Unknown	N/A	1.1.29.49.547.1303.2277	Available	1		SRR7170936			PRJNA315192	3.6.3	Central Asia III	strong	1.1.29.49.547	No	No
SRR7170937	2018	M	16 - 60	England	Unknown	N/A	1.1.29.49.547.1303.2271	Available	1		SRR7170937			PRJNA315192	3.6.3	Central Asia III	strong	1.1.29.49.547	No	No
SRR7184365	2018	F	< 16	England	No	N/A	1.1.29.49.547.603.2198	Available	1		SRR7184365			PRJNA315192	3.6.3	Central Asia III	strong	1.1.29.49.547	No	No
SRR7187833	2018	F	16 - 60	England	No	N/A	1.1.29.49.547.1303.2342	Available	1		SRR7187833			PRJNA315192	3.6.3	Central Asia III	strong	1.1.29.49.547	No	No
SRR7191716	2017	F	> 60	England	Unknown	N/A	1.1.29.49.547.603.2071	Available	1		SRR7191716			PRJNA315192	3.6.3	Central Asia III	strong	1.1.29.49.547	No	No
SRR7221247	2017	M	< 16	England	Yes	Asia	1.1.29.49.547.1471.2039	Available	1		SRR7221247			PRJNA315192	3.6.3	Central Asia III	strong	1.1.29.49.547	No	No
SRR7223115	2017	F	> 60	England	Unknown	N/A	1.1.29.49.547.603.1609	Available	1		SRR7223115			PRJNA315192	3.6.3	Central Asia III	strong	1.1.29.49.547	No	No
SRR7230380	2018	M	16 - 60	England	No	N/A	1.1.29.49.547.1623.2355	Available	1		SRR7230380			PRJNA315192	3.6.3	Central Asia III	strong	1.1.29.49.547	No	No
SRR7244328	2017	F	< 16	England	Unknown	N/A	1.1.29.49.547.603.2060	Available	1		SRR7244328			PRJNA315192	3.6.3	Central Asia III	strong	1.1.29.49.547	No	No
SRR7266787	2018	F	16 - 60	England	Unknown	N/A	1.1.29.49.547.1623.2353	Available	1		SRR7266787			PRJNA315192	3.6.3	Central Asia III	strong	1.1.29.49.547	No	No
SRR7276899	2018	F	< 16	England	No	N/A	1.1.29.49.547.1623.2349	Available	1		SRR7276899			PRJNA315192	3.6.3	Central Asia III	strong	1.1.29.49.547	No	No
SRR7286499	2018	F	16 - 60	England	Unknown	N/A	1.1.29.49.547.1623.2367	Available	1		SRR7286499			PRJNA315192	3.6.3	Central Asia III	strong	1.1.29.49.547	No	No
SRR7290986	2018	F	< 16	England	No	N/A	1.1.29.49.547.1623.2349	Available	1		SRR7290986			PRJNA315192	3.6.3	Central Asia III	strong	1.1.29.49.547	No	No
SRR7291023	2017	M	> 60	England	Unknown	N/A	1.1.29.49.547.1491.2077	Available	1		SRR7291023			PRJNA315192	3.6.3	Central Asia III	strong	1.1.29.49.547	No	No
SRR7367398	2018	F	16 - 60	England	Yes	Asia	1.1.29.49.547.1639.2392	Available	1		SRR7367398			PRJNA315192	3.6.3	Central Asia III	strong	1.1.29.49.547	No	No
SRR7367570	2018	F	16 - 60	England	No	N/A	1.1.29.49.547.1303.2271	Available	1		SRR7367570			PRJNA315192	3.6.3	Central Asia III	strong	1.1.29.49.547	No	No
SRR7401614	2018	M	< 16	England	Unknown	N/A	1.1.29.49.547.603.2393	Available	1		SRR7401614			PRJNA315192	3.6.3	Central Asia III	strong	1.1.29.49.547	No	No
SRR7849986	2018	M	< 16	England	Yes	Asia	1.1.29.49.547.1639.2786	Available	1		SRR7849986			PRJNA315192	3.6.3	Central Asia III	strong	1.1.29.49.547	No	No
SRR7943896	2018	F	16 - 60	England	Yes	Asia	1.1.29.49.547.1639.2831	Available	1		SRR7943896			PRJNA315192	3.6.3	Central Asia III	strong	1.1.29.49.547	No	No
SRR8114782	2018	M	< 16	England	Yes	Asia	1.1.29.49.547.1906.2913	Available	1		SRR8114782			PRJNA315192	3.6.3	Central Asia III	strong	1.1.29.49.547	No	No
SRR8440739	2019	F	< 16	England	Unknown	N/A	1.1.29.49.547.603.3110	Available	1		SRR8440739			PRJNA315192	3.6.3	Central Asia III	strong	1.1.29.49.547	No	No
SRR8568153	2019	F	16 - 60	England	Unknown	N/A	1.1.29.49.547.2025.3163	Available	1		SRR8568153			PRJNA315192	3.6.3	Central Asia III	strong	1.1.29.49.547	No	No
SRR9121360	2019	F	< 16	England	Yes	Asia	1.1.29.49.547.2106.3302	Available	1		SRR9121360			PRJNA315192	3.6.3	Central Asia III	strong	1.1.29.49.547	No	No
SRR9178553	2019	M	16 - 60	England	Yes	Asia	1.1.29.49.547.2106.3302	Available	1		SRR9178553			PRJNA315192	3.6.3	Central Asia III	strong	1.1.29.49.547	No	No
SRR9188557	2019	F	16 - 60	England	Unknown	N/A	1.1.29.49.547.2106.3302	Available	1		SRR9188557			PRJNA315192	3.6.3	Central Asia III	strong	1.1.29.49.547	No	No
SRR9306530	2019	M	> 60	England	Unknown	N/A	1.1.29.49.547.2132.3347	Available	1		SRR9306530			PRJNA315192	3.6.3	Central Asia III	strong	1.1.29.49.547	No	No
SRR9678246	2019	F	< 16	England	Yes	Asia	1.1.29.49.547.2156.3391	Available	1		SRR9678246			PRJNA315192	3.6.3	Central Asia III	strong	1.1.29.49.547	No	No
SRR9678248	2019	F	16 - 60	England	Yes	Asia	1.1.29.49.547.2106.3302	Available	1		SRR9678248			PRJNA315192	3.6.3	Central Asia III	strong	1.1.29.49.547	No	No
SRR9719287	2019	M	16 - 60	England	Yes	Asia	1.1.29.49.547.2106.3396	Available	1		SRR9719287			PRJNA315192	3.6.3	Central Asia III	strong	1.1.29.49.547	No	No
SRR9826939	2019	M	16 - 60	England	Unknown	N/A	1.1.29.49.547.2163.3401	Available	1		SRR9826939			PRJNA315192	3.6.3	Central Asia III	strong	1.1.29.49.547	No	No
SRR4787398	2016	M	< 16	England	Yes	North America	1.1.29.49.558.616.830	Available	1		SRR4787398			PRJNA315192	3.6.3	Central Asia III	strong	1.1.29.49.558	No	No
SRR4787810	2016	F	16 - 60	England	Yes	North America	1.1.29.49.558.616.817	Available	1		SRR4787810			PRJNA315192	3.6.3	Central Asia III	strong	1.1.29.49.558	No	No
SRR4787826	2016	M	< 16	England	Yes	Asia	1.1.29.49.558.616.991	Available	1		SRR4787826			PRJNA315192	3.6.3	Central Asia III	strong	1.1.29.49.558	No	No
SRR7221267	2016	F	< 16	England	No	N/A	1.1.29.49.558.616.991	Available	1		SRR7221267			PRJNA315192	3.6.3	Central Asia III	strong	1.1.29.49.558	No	No
SRR7251025	2017	Unknown	< 16	England	Unknown	N/A	1.1.29.49.558.616.1603	Available	1		SRR7251025			PRJNA315192	3.6.3	Central Asia III	strong	1.1.29.49.558	No	No
SRR5018377	2016	M	< 16	England	Yes	North America	1.1.29.49.567.625.829	Available	1		SRR5018377			PRJNA315192	3.6.3	Central Asia III	strong	1.1.29.49.567	No	No
SRR4897756	2016	M	16 - 60	England	Yes	North America	1.1.29.49.572.631.839	Available	1		SRR4897756			PRJNA315192	3.6.3	Central Asia III	strong	1.1.29.49.572	No	No
SRR5005341	2016	F	16 - 60	England	Unknown	N/A	1.1.29.49.572.792.1095	Available	1		SRR5005341			PRJNA315192	3.6.3	Central Asia III	strong	1.1.29.49.572	No	No
SRR7172297	2017	F	< 16	England	Yes	Asia	1.1.29.49.572.631.1600	Available	1		SRR7172297			PRJNA315192	3.6.3	Central Asia III	strong	1.1.29.49.572	No	No
SRR7223125	2017	M	< 16	England	Yes	Asia	1.1.29.49.572.631.1600	Available	1		SRR7223125			PRJNA315192	3.6.3	Central Asia III	strong	1.1.29.49.572	No	No
SRR7274851	2017	M	< 16	England	Yes	Unknown	1.1.29.49.572.792.1782	Available	1		SRR7274851			PRJNA315192	3.6.3	Central Asia III	strong	1.1.29.49.572	No	No
SRR7283801	2017	M	< 16	England	No	N/A	1.1.29.49.572.792.1796	Available	1		SRR7283801			PRJNA315192	3.6.3	Central Asia III	strong	1.1.29.49.572	No	No
SRR7286257	2017	F	< 16	England	No	N/A	1.1.29.49.572.792.1974	Available	1		SRR7286257			PRJNA315192	3.6.3	Central Asia III	strong	1.1.29.49.572	No	No
SRR7286597	2017	F	16 - 60	England	Unknown	N/A	1.1.29.49.572.792.1693	Available	1		SRR7286597			PRJNA315192	3.6.3	Central Asia III	strong	1.1.29.49.572	No	No
SRR7290931	2017	M	16 - 60	England	Unknown	N/A	1.1.29.49.572.792.1815	Available	1		SRR7290931			PRJNA315192	3.6.3	Central Asia III	strong	1.1.29.49.572	No	No
SRR7367251	2017	M	< 16	England	Yes	Asia	1.1.29.49.572.792.1780	Available	1		SRR7367251			PRJNA315192	3.6.3	Central Asia III	strong	1.1.29.49.572	No	No
SRR7367475	2017	F	16 - 60	England	Unknown	N/A	1.1.29.49.572.792.1815	Available	1		SRR7367475			PRJNA315192	3.6.3	Central Asia III	strong	1.1.29.49.572	No	No
SRR4788282	2016	F	16 - 60	England	Unknown	N/A	1.1.29.49.58.606.799	Available	1		SRR4788282			PRJNA315192	3.6.3	Central Asia III	strong	1.1.29.49.58	No	No
SRR7184338	2017	M	< 16	England	No	N/A	1.1.29.49.58.1250.1669	Available	1		SRR7184338			PRJNA315192	3.6.3	Central Asia III	strong	1.1.29.49.58	No	No
SRR7204317	2017	F	16 - 60	England	Yes	Asia	1.1.29.49.58.59.1945	Available	1		SRR7204317			PRJNA315192	3.6.3	Central Asia III	strong	1.1.29.49.58	No	No
SRR7215527	2017	M	> 60	England	Yes	Asia	1.1.29.49.58.1211.1583	Available	1		SRR7215527			PRJNA315192	3.6.3	Central Asia III	strong	1.1.29.49.58	No	No
SRR7250987	2017	F	16 - 60	England	Yes	Asia	1.1.29.49.58.59.1696	Available	1		SRR7250987			PRJNA315192	3.6.3	Central Asia III	strong	1.1.29.49.58	No	No
SRR7251058	2017	F	16 - 60	England	Yes	Asia	1.1.29.49.58.59.1746	Available	1		SRR7251058			PRJNA315192	3.6.3	Central Asia III	strong	1.1.29.49.58	No	No
SRR7276953	2017	M	< 16	England	Yes	Asia	1.1.29.49.58.59.1696	Available	1		SRR7276953			PRJNA315192	3.6.3	Central Asia III	strong	1.1.29.49.58	No	No
SRR7282620	2017	F	16 - 60	England	Unknown	N/A	1.1.29.49.58.59.1621	Available	1		SRR7282620			PRJNA315192	3.6.3	Central Asia III	strong	1.1.29.49.58	No	No
SRR7283726	2017	F	16 - 60	England	Unknown	N/A	1.1.29.49.58.59.1901	Available	1		SRR7283726			PRJNA315192	3.6.3	Central Asia III	strong	1.1.29.49.58	No	No
SRR7286569	2017	F	16 - 60	England	Unknown	N/A	1.1.29.49.58.59.1888	Available	1		SRR7286569			PRJNA315192	3.6.3	Central Asia III	strong	1.1.29.49.58	No	No
SRR4788245	2016	M	< 16	England	Yes	North America	1.1.29.49.584.645.864	Available	1		SRR4788245			PRJNA315192	3.6.3	Central Asia III	strong	1.1.29.49.584	No	No
SRR4788247	2016	F	16 - 60	England	Yes	North America	1.1.29.49.619.685.925	Available	1		SRR4788247			PRJNA315192	3.6.3	Central Asia III	strong	1.1.29.49.619	No	No
SRR7223075	2016	F	< 16	England	Unknown	N/A	1.1.29.49.619.779.1074	Available	1		SRR7223075			PRJNA315192	3.6.3	Central Asia III	strong	1.1.29.49.619	No	No
SRR4787193	2016	F	16 - 60	England	Yes	Africa	1.1.29.49.625.696.941	Available	1		SRR4787193			PRJNA315192	3.6.3	Central Asia III	strong	1.1.29.49.625	No	No
SRR5023935	2016	F	< 16	England	Yes	North America	1.1.29.49.657.777.1071	Available	1		SRR5023935			PRJNA315192	3.6.3	Central Asia III	strong	1.1.29.49.657	No	No
SRR7285450	2016	F	< 16	England	Yes	North America	1.1.29.49.657.741.1018	Available	1		SRR7285450			PRJNA315192	3.6.3	Central Asia III	strong	1.1.29.49.657	No	No
SRR7230384	2017	F	16 - 60	England	Yes	Unknown	1.1.29.689.1125.1263.1689	Available	1		SRR7230384			PRJNA315192	3.6.3	Central Asia III	strong	1.1.29.689.1125	No	No
SRR7230219	2017	F	16 - 60	England	Unknown	N/A	1.1.29.719.1186.1347.1829	Available	1		SRR7230219			PRJNA315192	3.6.3	Central Asia III	strong	1.1.29.719.1186	No	No
SRR7527644	2018	M	16 - 60	England	No	N/A	1.1.29.844.1435.1671.2454	Available	1		SRR7527644			PRJNA315192	3.6.3	Central Asia III	strong	1.1.29.844.1435	No	No
SRR7588677	2018	F	< 16	England	Unknown	N/A	1.1.29.844.1435.1671.2533	Available	1		SRR7588677			PRJNA315192	3.6.3	Central Asia III	strong	1.1.29.844.1435	No	No
SRR7588680	2018	F	< 16	England	No	N/A	1.1.29.844.1435.1671.2643	Available	1		SRR7588680			PRJNA315192	3.6.3	Central Asia III	strong	1.1.29.844.1435	No	No
SRR7833088	2018	F	16 - 60	England	Yes	Asia	1.1.29.844.1435.1671.2723	Available	1		SRR7833088			PRJNA315192	3.6.3	Central Asia III	strong	1.1.29.844.1435	No	No
SRR7850182	2018	F	16 - 60	England	Unknown	N/A	1.1.29.844.1435.1671.2701	Available	1		SRR7850182			PRJNA315192	3.6.3	Central Asia III	strong	1.1.29.844.1435	No	No
SRR8032870	2018	M	16 - 60	England	Unknown	N/A	1.1.29.933.1603.1888.2870	Available	1		SRR8032870			PRJNA315192	3.6.3	Central Asia III	strong	1.1.29.933.1603	No	No
SRR7286631	2017	F	16 - 60	England	Yes	Africa	1.1.353.702.1151.1299.1744	Available	1		SRR7286631			PRJNA315192	3.6	Central Asia III	strong	1.1.353.702.1151	No	No
SRR10693153	2019	M	16 - 60	England	Yes	Africa	1.1.353.702.1918.2367.3817	Available	1		SRR10693153			PRJNA315192	3.6	Central Asia III	strong	1.1.353.702.1918	No	No
SRR10915006	2020	F	16 - 60	England	Unknown	N/A	1.1.353.702.1918.2367.3879	Available	1		SRR10915006			PRJNA315192	3.6	Central Asia III	strong	1.1.353.702.1918	No	No
SRR7221248	2017	F	< 16	England	Yes	Africa	1.1.377.768.1272.1460.2018	Available	1		SRR7221248			PRJNA315192	3.6.2	Central Asia III	strong	1.1.377.768.1272	No	No
SRR7291953	2017	F	> 60	England	Yes	Africa	1.1.380.782.1304.1505.2101	Available	1		SRR7291953			PRJNA315192	3.6	Central Asia III	strong	1.1.380.782.1304	No	No
SRR10431627	2019	F	> 60	England	Unknown	N/A	1.1.43.1036.1893.2321.3744	Available	1		SRR10431627			PRJNA315192	3.6.2	Central Asia III	strong	1.1.43.1036.1893	No	No
SRR4787283	2016	F	16 - 60	England	Yes	Africa	1.1.43.151.268.275.1034	Available	1		SRR4787283			PRJNA315192	3.6.2	Central Asia III	strong	1.1.43.151.268	No	No
SRR4787437	2016	F	> 60	England	Unknown	N/A	1.1.43.151.268.275.1103	Available	1		SRR4787437			PRJNA315192	3.6.2	Central Asia III	strong	1.1.43.151.268	No	No
SRR4897438	2016	M	16 - 60	England	Yes	Asia	1.1.43.151.268.275.1056	Available	1		SRR4897438			PRJNA315192	3.6.2	Central Asia III	strong	1.1.43.151.268	No	No
SRR4897545	2016	F	16 - 60	England	Yes	Asia	1.1.43.151.268.275.955	Available	1		SRR4897545			PRJNA315192	3.6.2	Central Asia III	strong	1.1.43.151.268	No	No
SRR7187899	2016	F	16 - 60	England	No	N/A	1.1.43.151.268.275.1054	Available	1		SRR7187899			PRJNA315192	3.6.2	Central Asia III	strong	1.1.43.151.268	No	No
SRR7215571	2017	F	16 - 60	England	Yes	Africa	1.1.43.151.268.275.1927	Available	1		SRR7215571			PRJNA315192	3.6.2	Central Asia III	strong	1.1.43.151.268	No	No
SRR7215956	2017	F	16 - 60	England	Yes	Africa	1.1.43.151.268.275.1937	Available	1		SRR7215956			PRJNA315192	3.6.2	Central Asia III	strong	1.1.43.151.268	No	No
SRR7230235	2016	F	16 - 60	England	No	N/A	1.1.43.151.268.275.1054	Available	1		SRR7230235			PRJNA315192	3.6.2	Central Asia III	strong	1.1.43.151.268	No	No
SRR7277813	2017	F	16 - 60	England	Unknown	N/A	1.1.43.151.268.275.1966	Available	1		SRR7277813			PRJNA315192	3.6.2	Central Asia III	strong	1.1.43.151.268	No	No
SRR7407977	2017	F	16 - 60	England	Yes	Africa	1.1.43.151.268.275.1979	Available	1		SRR7407977			PRJNA315192	3.6.2	Central Asia III	strong	1.1.43.151.268	No	No
SRR7172262	2017	F	16 - 60	England	Yes	Asia	1.1.43.282.1195.1357.2103	Available	1		SRR7172262			PRJNA315192	3.6.2	Central Asia III	strong	1.1.43.282.1195	No	No
SRR7215279	2017	F	16 - 60	England	No	N/A	1.1.43.282.1195.1357.2103	Available	1		SRR7215279			PRJNA315192	3.6.2	Central Asia III	strong	1.1.43.282.1195	No	No
SRR7283672	2017	F	16 - 60	England	Yes	Africa	1.1.43.282.1195.1357.2115	Available	1		SRR7283672			PRJNA315192	3.6.2	Central Asia III	strong	1.1.43.282.1195	No	No
SRR7291607	2017	F	16 - 60	England	Yes	Africa	1.1.43.282.1195.1357.1851	Available	1		SRR7291607			PRJNA315192	3.6.2	Central Asia III	strong	1.1.43.282.1195	No	No
SRR10491358	2019	F	16 - 60	England	Yes	Africa	1.1.43.282.1901.2336.3763	Available	1		SRR10491358			PRJNA315192	3.6.2	Central Asia III	strong	1.1.43.282.1901	No	No
SRR4788343	2016	F	16 - 60	England	Unknown	N/A	1.1.43.282.371.728.1078	Available	1		SRR4788343			PRJNA315192	3.6.2	Central Asia III	strong	1.1.43.282.371	No	No
SRR4897831	2016	F	16 - 60	England	Yes	Africa	1.1.43.282.371.728.995	Available	1		SRR4897831			PRJNA315192	3.6.2	Central Asia III	strong	1.1.43.282.371	No	No
SRR7172429	2016	F	16 - 60	England	Yes	Asia	1.1.43.282.371.728.1529	Available	1		SRR7172429			PRJNA315192	3.6.2	Central Asia III	strong	1.1.43.282.371	No	No
SRR7204367	2016	F	16 - 60	England	Yes	Africa	1.1.43.282.371.728.1506	Available	1		SRR7204367			PRJNA315192	3.6.2	Central Asia III	strong	1.1.43.282.371	No	No
SRR7956013	2018	F	16 - 60	England	Unknown	N/A	1.1.43.282.371.1869.2839	Available	1		SRR7956013			PRJNA315192	3.6.2	Central Asia III	strong	1.1.43.282.371	No	No
SRR8183121	2018	F	16 - 60	England	Unknown	N/A	1.1.43.282.371.1869.2970	Available	1		SRR8183121			PRJNA315192	3.6.2	Central Asia III	strong	1.1.43.282.371	No	No
SRR8369241	2018	F	16 - 60	England	Unknown	N/A	1.1.43.282.371.1869.3077	Available	1		SRR8369241			PRJNA315192	3.6.2	Central Asia III	strong	1.1.43.282.371	No	No
SRR10599988	2019	M	16 - 60	England	Unknown	N/A	1.1.43.703.1152.2357.3802	Available	1		SRR10599988			PRJNA315192	3.6.2	Central Asia III	strong	1.1.43.703.1152	No	No
SRR10666902	2019	F	16 - 60	England	Yes	Africa	1.1.43.703.1152.2363.3811	Available	1		SRR10666902			PRJNA315192	3.6.2	Central Asia III	strong	1.1.43.703.1152	No	No
SRR12718018	2020	M	16 - 60	England	Unknown	N/A	1.1.43.703.1152.2484.4030	Available	1		SRR12718018			PRJNA315192	3.6.2	Central Asia III	strong	1.1.43.703.1152	No	No
SRR7187021	2017	M	16 - 60	England	Yes	Africa	1.1.43.703.1152.1300.1745	Available	1		SRR7187021			PRJNA315192	3.6.2	Central Asia III	strong	1.1.43.703.1152	No	No
SRR7204245	2017	F	16 - 60	England	Unknown	N/A	1.1.43.703.1152.1482.2081	Available	1		SRR7204245			PRJNA315192	3.6.2	Central Asia III	strong	1.1.43.703.1152	No	No
SRR7230317	2017	F	16 - 60	England	Yes	Africa	1.1.43.703.1152.1482.2056	Available	1		SRR7230317			PRJNA315192	3.6.2	Central Asia III	strong	1.1.43.703.1152	No	No
SRR7290999	2017	M	16 - 60	England	Unknown	N/A	1.1.43.703.1152.1372.1871	Available	1		SRR7290999			PRJNA315192	3.6.2	Central Asia III	strong	1.1.43.703.1152	No	No
SRR7974363	2018	F	16 - 60	England	Yes	Africa	1.1.43.703.1152.1874.2846	Available	1		SRR7974363			PRJNA315192	3.6.2	Central Asia III	strong	1.1.43.703.1152	No	No
SRR7257039	2017	F	< 16	England	Unknown	N/A	1.1.43.73.1091.1217.1596	Available	1		SRR7257039			PRJNA315192	3.6.2	Central Asia III	strong	1.1.43.73.1091	No	No
SRR7285520	2017	F	16 - 60	England	Yes	Africa	1.1.43.73.1298.1498.2089	Available	1		SRR7285520			PRJNA315192	3.6.2	Central Asia III	strong	1.1.43.73.1298	No	No
SRR7265972	2017	F	16 - 60	England	Unknown	N/A	1.1.43.73.1312.1516.2119	Available	1		SRR7265972			PRJNA315192	3.6.2	Central Asia III	strong	1.1.43.73.1312	No	No
SRR7244278	2016	F	16 - 60	England	Yes	Asia	1.1.43.73.83.926.1249	Available	1		SRR7244278			PRJNA315192	3.6.2	Central Asia III	strong	1.1.43.73.83	No	No
SRR7291011	2016	M	< 16	England	Yes	Asia	1.1.43.73.83.113.1004	Available	1		SRR7291011			PRJNA315192	3.6.2	Central Asia III	strong	1.1.43.73.83	No	No
SRR7249514	2017	M	16 - 60	England	Yes	Asia	1.1.45.371.1170.1327.1789	Available	1		SRR7249514			PRJNA315192	3.6.2	Central Asia III	strong	1.1.45.371.1170	No	No
SRR9973682	2019	F	16 - 60	England	Yes	Asia	1.1.45.371.1806.2191.3448	Available	1		SRR9973682			PRJNA315192	3.6.2	Central Asia III	strong	1.1.45.371.1806	No	No
SRR3530434	2016	F	< 16	England	Unknown	N/A	1.1.45.371.496.543.700	Available	1		SRR3530434			PRJNA315192	3.6.2	Central Asia III	strong	1.1.45.371.496	No	No
SRR3530634	2016	F	< 16	England	Unknown	N/A	1.1.45.371.496.543.700	Available	1		SRR3530634			PRJNA315192	3.6.2	Central Asia III	strong	1.1.45.371.496	No	No
SRR3531867	2016	F	< 16	England	Unknown	N/A	1.1.45.371.496.543.700	Available	1		SRR3531867			PRJNA315192	3.6.2	Central Asia III	strong	1.1.45.371.496	No	No
SRR5006356	2016	F	16 - 60	England	Unknown	N/A	1.1.45.371.496.543.700	Available	1		SRR5006356			PRJNA315192	3.6.2	Central Asia III	strong	1.1.45.371.496	No	No
SRR5006400	2016	F	< 16	England	Unknown	N/A	1.1.45.371.663.746.1025	Available	1		SRR5006400			PRJNA315192	3.6.2	Central Asia III	strong	1.1.45.371.663	No	No
SRR4788208	2016	M	16 - 60	England	Yes	Asia	1.1.45.481.686.767.1061	Available	1		SRR4788208			PRJNA315192	3.6.2	Central Asia III	strong	1.1.45.481.686	No	No
SRR7457802	2018	M	16 - 60	England	Unknown	N/A	1.1.45.838.1424.1658.2427	Available	1		SRR7457802			PRJNA315192	3.6.2	Central Asia III	strong	1.1.45.838.1424	No	No
SRR10521910	2019	M	16 - 60	England	Yes	Africa	1.1.474.1040.1905.2345.3781	Available	1		SRR10521910			PRJNA315192	3.6	Central Asia III	strong	1.1.474.1040.1905	No	No
SRR10693124	2019	F	> 60	England	Yes	Africa	1.1.476.1045.1917.2366.3816	Available	1		SRR10693124			PRJNA315192	3.6	Central Asia III	strong	1.1.476.1045.1917	No	No
SRR10916983	2020	F	16 - 60	England	Unknown	N/A	1.1.476.1058.1944.2407.3885	Available	1		SRR10916983			PRJNA315192	3.6	Central Asia III	strong	1.1.476.1058.1944	No	No
SRR10698319	2019	F	> 60	England	Yes	Africa	1.1.481.1050.1923.2372.3826	Available	1		SRR10698319			PRJNA315192	3.6	Central Asia III	strong	1.1.481.1050.1923	No	No
SRR10247303	2019	F	< 16	England	Unknown	N/A	1.137.177.387.1866.2282.3674	Available	1		SRR10247303			PRJNA315192	3.6.4	Central Asia III	strong	1.137.177.387.1866	No	No
SRR3742265	2016	M	16 - 60	England	Yes	South America	1.137.177.387.517.567.903	Available	1		SRR3742265			PRJNA315192	3.6.4	Central Asia III	strong	1.137.177.387.517	No	No
SRR4787387	2016	F	16 - 60	England	Unknown	N/A	1.137.177.387.517.735.1009	Available	1		SRR4787387			PRJNA315192	3.6.4	Central Asia III	strong	1.137.177.387.517	No	No
SRR4897579	2016	F	16 - 60	England	Yes	Asia	1.137.177.387.517.567.920	Available	1		SRR4897579			PRJNA315192	3.6.4	Central Asia III	strong	1.137.177.387.517	No	No
SRR7187862	2016	M	16 - 60	England	Yes	Unknown	1.137.177.387.517.567.889	Available	1		SRR7187862			PRJNA315192	3.6.4	Central Asia III	strong	1.137.177.387.517	No	No
SRR4897660	2016	F	< 16	England	Yes	South America	1.137.177.387.651.734.1008	Available	1		SRR4897660			PRJNA315192	3.6.4	Central Asia III	strong	1.137.177.387.651	No	No
SRR7187057	2017	F	16 - 60	England	Unknown	N/A	1.137.177.387.651.734.2065	Available	1		SRR7187057			PRJNA315192	3.6.4	Central Asia III	strong	1.137.177.387.651	No	No
SRR7291600	2018	F	< 16	England	Yes	Asia	1.137.177.387.651.734.2205	Available	1		SRR7291600			PRJNA315192	3.6.4	Central Asia III	strong	1.137.177.387.651	No	No
SRR5023926	2016	M	16 - 60	England	Unknown	N/A	1.137.177.387.691.774.1068	Available	1		SRR5023926			PRJNA315192	3.6.4	Central Asia III	strong	1.137.177.387.691	No	No
SRR5005438	2016	F	16 - 60	England	Unknown	N/A	1.137.177.387.694.778.1073	Available	1		SRR5005438			PRJNA315192	3.6.4	Central Asia III	strong	1.137.177.387.694	No	No
SRR5006365	2016	M	> 60	England	Unknown	N/A	1.137.177.387.694.778.1072	Available	1		SRR5006365			PRJNA315192	3.6.4	Central Asia III	strong	1.137.177.387.694	No	No
SRR7187838	2017	M	16 - 60	England	No	N/A	1.137.177.405.1273.1461.2019	Available	1		SRR7187838			PRJNA315192	3.6.4	Central Asia III	strong	1.137.177.405.1273	No	No
SRR10905047	2020	F	> 60	England	Unknown	N/A	1.137.177.405.1554.2399.3874	Available	1		SRR10905047			PRJNA315192	3.6.4	Central Asia III	strong	1.137.177.405.1554	No	No
SRR10905056	2020	F	16 - 60	England	Unknown	N/A	1.137.177.405.1554.2399.3874	Available	1		SRR10905056			PRJNA315192	3.6.4	Central Asia III	strong	1.137.177.405.1554	No	No
SRR10962109	2020	M	> 60	England	Unknown	N/A	1.137.177.405.1554.2399.3874	Available	1		SRR10962109			PRJNA315192	3.6.4	Central Asia III	strong	1.137.177.405.1554	No	No
SRR7838553	2018	F	> 60	England	Unknown	N/A	1.137.177.405.1554.1818.2757	Available	1		SRR7838553			PRJNA315192	3.6.4	Central Asia III	strong	1.137.177.405.1554	No	No
SRR7842067	2018	M	< 16	England	Yes	Unknown	1.137.177.405.1554.1818.2747	Available	1		SRR7842067			PRJNA315192	3.6.4	Central Asia III	strong	1.137.177.405.1554	No	No
SRR7850193	2018	M	16 - 60	England	Yes	Asia	1.137.177.405.1554.1818.2737	Available	1		SRR7850193			PRJNA315192	3.6.4	Central Asia III	strong	1.137.177.405.1554	No	No
SRR7850229	2018	F	16 - 60	England	Unknown	N/A	1.137.177.405.1554.1818.2757	Available	1		SRR7850229			PRJNA315192	3.6.4	Central Asia III	strong	1.137.177.405.1554	No	No
SRR7866251	2018	M	16 - 60	England	Unknown	N/A	1.137.177.405.1554.1818.2757	Available	1		SRR7866251			PRJNA315192	3.6.4	Central Asia III	strong	1.137.177.405.1554	No	No
SRR7890018	2018	F	16 - 60	England	Yes	Unknown	1.137.177.405.1554.1818.2804	Available	1		SRR7890018			PRJNA315192	3.6.4	Central Asia III	strong	1.137.177.405.1554	No	No
SRR8878464	2019	M	16 - 60	England	Unknown	N/A	1.137.177.405.1554.1818.3230	Available	1		SRR8878464			PRJNA315192	3.6.4	Central Asia III	strong	1.137.177.405.1554	No	No
SRR8924404	2019	F	16 - 60	England	Yes	Asia	1.137.177.405.1554.1818.3237	Available	1		SRR8924404			PRJNA315192	3.6.4	Central Asia III	strong	1.137.177.405.1554	No	No
SRR8981810	2019	F	> 60	England	Unknown	N/A	1.137.177.405.1554.1818.3230	Available	1		SRR8981810			PRJNA315192	3.6.4	Central Asia III	strong	1.137.177.405.1554	No	No
SRR9007500	2019	M	16 - 60	England	Yes	Asia	1.137.177.405.1554.1818.3230	Available	1		SRR9007500			PRJNA315192	3.6.4	Central Asia III	strong	1.137.177.405.1554	No	No
SRR9018474	2019	F	16 - 60	England	Yes	Asia	1.137.177.405.1554.1818.3230	Available	1		SRR9018474			PRJNA315192	3.6.4	Central Asia III	strong	1.137.177.405.1554	No	No
SRR9018539	2019	M	> 60	England	Yes	Oceania	1.137.177.405.1554.1818.3271	Available	1		SRR9018539			PRJNA315192	3.6.4	Central Asia III	strong	1.137.177.405.1554	No	No
SRR9050408	2019	F	16 - 60	England	Unknown	N/A	1.137.177.405.1554.1818.3230	Available	1		SRR9050408			PRJNA315192	3.6.4	Central Asia III	strong	1.137.177.405.1554	No	No
SRR9050414	2019	F	16 - 60	England	Unknown	N/A	1.137.177.405.1554.1818.3230	Available	1		SRR9050414			PRJNA315192	3.6.4	Central Asia III	strong	1.137.177.405.1554	No	No
SRR9083746	2019	F	16 - 60	England	Yes	Asia	1.137.177.405.1554.1818.3230	Available	1		SRR9083746			PRJNA315192	3.6.4	Central Asia III	strong	1.137.177.405.1554	No	No
SRR9258375	2019	F	> 60	England	Unknown	N/A	1.137.177.405.1554.1818.3237	Available	1		SRR9258375			PRJNA315192	3.6.4	Central Asia III	strong	1.137.177.405.1554	No	No
SRR9258699	2019	F	< 16	England	Yes	Asia	1.137.177.405.1554.1818.3338	Available	1		SRR9258699			PRJNA315192	3.6.4	Central Asia III	strong	1.137.177.405.1554	No	No
SRR9260660	2019	M	< 16	England	Yes	Asia	1.137.177.405.1554.1818.3230	Available	1		SRR9260660			PRJNA315192	3.6.4	Central Asia III	strong	1.137.177.405.1554	No	No
SRR8380559	2018	F	16 - 60	England	Yes	Asia	1.137.177.405.1680.1990.3083	Available	1		SRR8380559			PRJNA315192	3.6.4	Central Asia III	strong	1.137.177.405.1680	No	No
SRR8553842	2019	M	16 - 60	England	No	N/A	1.137.177.405.1698.2019.3149	Available	1		SRR8553842			PRJNA315192	3.6.4	Central Asia III	strong	1.137.177.405.1698	No	No
SRR10452823	2019	F	16 - 60	England	Unknown	N/A	1.137.177.405.1899.2331.3757	Available	1		SRR10452823			PRJNA315192	3.6.4	Central Asia III	strong	1.137.177.405.1899	No	No
SRR4787081	2016	F	< 16	England	Unknown	N/A	1.137.177.405.544.600.791	Available	1		SRR4787081			PRJNA315192	3.6.4	Central Asia III	strong	1.137.177.405.544	No	No
SRR7265862	2017	F	16 - 60	England	Yes	Asia	1.137.177.405.544.1530.2141	Available	1		SRR7265862			PRJNA315192	3.6.4	Central Asia III	strong	1.137.177.405.544	No	No
SRR8165813	2018	F	16 - 60	England	Unknown	N/A	1.137.177.405.544.1921.2944	Available	1		SRR8165813			PRJNA315192	3.6.4	Central Asia III	strong	1.137.177.405.544	No	No
SRR8382247	2018	M	< 16	England	Unknown	N/A	1.137.177.405.544.1530.3086	Available	1		SRR8382247			PRJNA315192	3.6.4	Central Asia III	strong	1.137.177.405.544	No	No
SRR9586543	2019	M	16 - 60	England	Unknown	N/A	1.137.177.405.544.2144.3367	Available	1		SRR9586543			PRJNA315192	3.6.4	Central Asia III	strong	1.137.177.405.544	No	No
SRR7266775	2017	F	16 - 60	England	Yes	Asia	1.137.177.678.1113.1244.1654	Available	1		SRR7266775			PRJNA315192	3.6.4	Central Asia III	strong	1.137.177.678.1113	No	No
SRR4897235	2016	F	16 - 60	England	Yes	Africa	1.137.193.447.609.675.911	Available	1		SRR4897235			PRJNA315192	3.6.4	Central Asia III	strong	1.137.193.447.609	No	No
SRR7208637	2017	M	< 16	England	Yes	Asia	1.209.338.667.1094.1220.1601	Available	1		SRR7208637			PRJNA315192	3.6.4	Central Asia III	strong	1.209.338.667.1094	No	No
SRR7221327	2018	F	< 16	England	Yes	Africa	1.225.395.815.1378.1605.2313	Available	1		SRR7221327			PRJNA315192	3.6.4	Central Asia III	strong	1.225.395.815.1378	No	No
SRR7401622	2018	F	16 - 60	England	Unknown	N/A	1.226.398.824.1401.1631.2375	Available	1		SRR7401622			PRJNA315192	3.6	Central Asia III	strong	1.226.398.824.1401	No	No
SRR3531685	Ref	Ref	Ref	Ref	Ref	Ref	Ref	Available	1		SRR3531685				3.7.29.1.2	Global III VN2.MSM2	strong	Ref....		No
SRR7885865	Ref	Ref	Ref	Ref	Ref	Ref	Ref	Available	1		SRR7885865				2.7.2	Unknown	strong	Ref....		No
SRR7885867	Ref	Ref	Ref	Ref	Ref	Ref	Ref	Available	1		SRR7885867				2.7.3	Unknown	strong	Ref....		No
SRR7885870	Ref	Ref	Ref	Ref	Ref	Ref	Ref	Available	1		SRR7885870				2.6.1	Unknown	strong	Ref....		No
SRR10120197	2019	F	16 - 60	England	No	N/A	1.1.1.1.1086.1208.3456	Available	1		SRR10120197			PRJNA315192	3.6.1.1	CipR	strong	1.1.1.1.1086	No	No
SRR7184249	2017	F	16 - 60	England	Yes	Asia	1.1.1.1.1086.1208.1580	Available	1		SRR7184249			PRJNA315192	3.6.1.1	CipR	strong	1.1.1.1.1086	No	No
SRR7286625	2017	F	16 - 60	England	No	N/A	1.1.1.1.1086.1208.1787	Available	1		SRR7286625			PRJNA315192	3.6.1.1	CipR	strong	1.1.1.1.1086	No	No
SRR7956012	2018	M	16 - 60	England	Yes	Asia	1.1.1.1.1086.1870.2842	Available	1		SRR7956012			PRJNA315192	3.6.1.1	CipR	strong	1.1.1.1.1086	No	No
SRR9988862	2019	M	16 - 60	England	Unknown	N/A	1.1.1.1.1086.1208.3456	Available	1		SRR9988862			PRJNA315192	3.6.1.1	CipR	strong	1.1.1.1.1086	No	No
SRR7187769	2017	M	16 - 60	England	Yes	Asia	1.1.1.1.1090.1216.1595	Available	1		SRR7187769			PRJNA315192	3.6.1.1	CipR	strong	1.1.1.1.1090	No	No
SRR7244333	2017	F	< 16	England	Unknown	N/A	1.1.1.1.1099.1226.1619	Available	1		SRR7244333			PRJNA315192	3.6.1.1	CipR	strong	1.1.1.1.1099	No	No
SRR7191548	2017	M	> 60	England	Yes	Asia	1.1.1.1.1164.1317.1767	Available	1		SRR7191548			PRJNA315192	3.6.1.1	CipR	strong	1.1.1.1.1164	No	No
SRR7286565	2017	F	16 - 60	England	Unknown	N/A	1.1.1.1.1178.1337.1805	Available	1		SRR7286565			PRJNA315192	3.6.1.1	CipR	strong	1.1.1.1.1178	No	No
SRR7286532	2017	F	16 - 60	England	Unknown	N/A	1.1.1.1.1180.1341.1810	Available	1		SRR7286532			PRJNA315192	3.6.1.1	CipR	strong	1.1.1.1.1180	No	No
SRR7187793	2017	M	16 - 60	England	Unknown	N/A	1.1.1.1.1200.1364.1857	Available	1		SRR7187793			PRJNA315192	3.6.1.1	CipR	strong	1.1.1.1.1200	No	No
SRR7286610	2017	M	16 - 60	England	Unknown	N/A	1.1.1.1.1200.1364.1857	Available	1		SRR7286610			PRJNA315192	3.6.1.1	CipR	strong	1.1.1.1.1200	No	No
SRR7172258	2017	F	16 - 60	England	No	N/A	1.1.1.1.1207.1373.1872	Available	1		SRR7172258			PRJNA315192	3.6.1.1	CipR	strong	1.1.1.1.1207	No	No
SRR7286489	2017	F	> 60	England	Unknown	N/A	1.1.1.1.1207.1373.1872	Available	1		SRR7286489			PRJNA315192	3.6.1.1	CipR	strong	1.1.1.1.1207	No	No
SRR7179910	2017	F	< 16	England	Unknown	N/A	1.1.1.1.1258.1443.1996	Available	1		SRR7179910			PRJNA315192	3.6.1.1	CipR	strong	1.1.1.1.1258	No	No
SRR7257118	2017	M	< 16	England	Unknown	N/A	1.1.1.1.1260.1447.2000	Available	1		SRR7257118			PRJNA315192	3.6.1.1	CipR	strong	1.1.1.1.1260	No	No
SRR7266805	2017	F	< 16	England	Unknown	N/A	1.1.1.1.1277.1466.2032	Available	1		SRR7266805			PRJNA315192	3.6.1.1	CipR	strong	1.1.1.1.1277	No	No
SRR7367579	2017	F	16 - 60	England	Unknown	N/A	1.1.1.1.1284.1478.2052	Available	1		SRR7367579			PRJNA315192	3.6.1.1	CipR	strong	1.1.1.1.1284	No	No
SRR7286623	2017	F	16 - 60	England	Unknown	N/A	1.1.1.1.1290.1487.2066	Available	1		SRR7286623			PRJNA315192	3.6.1.1	CipR	strong	1.1.1.1.1290	No	No
SRR7204347	2017	F	16 - 60	England	Yes	Unknown	1.1.1.1.1296.1496.2086	Available	1		SRR7204347			PRJNA315192	3.6.1.1	CipR	strong	1.1.1.1.1296	No	No
SRR12630737	2020	M	16 - 60	England	No	N/A	1.1.1.1.1324.2483.4027	Available	1		SRR12630737			PRJNA315192	3.6.1.1	CipR	strong	1.1.1.1.1324	No	No
SRR7221323	2017	F	> 60	England	Yes	Asia	1.1.1.1.1324.1533.2153	Available	1		SRR7221323			PRJNA315192	3.6.1.1	CipR	strong	1.1.1.1.1324	No	No
SRR7236612	2018	F	16 - 60	England	Yes	Asia	1.1.1.1.1342.1555.2201	Available	1		SRR7236612			PRJNA315192	3.6.1.1	CipR	strong	1.1.1.1.1342	No	No
SRR7276906	2018	F	16 - 60	England	No	N/A	1.1.1.1.1356.1574.2239	Available	1		SRR7276906			PRJNA315192	3.6.1.1	CipR	strong	1.1.1.1.1356	No	No
SRR7286366	2018	F	16 - 60	England	Yes	Asia	1.1.1.1.1369.1592.2283	Available	1		SRR7286366			PRJNA315192	3.6.1.1	CipR	strong	1.1.1.1.1369	No	No
SRR7367460	2018	F	16 - 60	England	Unknown	N/A	1.1.1.1.1402.1633.2380	Available	1		SRR7367460			PRJNA315192	3.6.1.1	CipR	strong	1.1.1.1.1402	No	No
SRR7474042	2018	M	16 - 60	England	Unknown	N/A	1.1.1.1.1426.1660.2433	Available	1		SRR7474042			PRJNA315192	3.6.1.1	CipR	strong	1.1.1.1.1426	No	No
SRR7850121	2018	F	16 - 60	England	Unknown	N/A	1.1.1.1.1572.1843.2785	Available	1		SRR7850121			PRJNA315192	3.6.1.1	CipR	strong	1.1.1.1.1572	No	No
SRR7956022	2018	M	16 - 60	England	Yes	Asia	1.1.1.1.1591.1872.2844	Available	1		SRR7956022			PRJNA315192	3.6.1.1	CipR	strong	1.1.1.1.1591	No	No
SRR8114766	2018	F	< 16	England	Unknown	N/A	1.1.1.1.1615.1905.2912	Available	1		SRR8114766			PRJNA315192	3.6.1.1	CipR	strong	1.1.1.1.1615	No	No
SRR8172607	2018	F	> 60	England	Yes	Asia	1.1.1.1.1626.1923.2947	Available	1		SRR8172607			PRJNA315192	3.6.1.1	CipR	strong	1.1.1.1.1626	No	No
SRR8166009	2018	M	16 - 60	England	Unknown	N/A	1.1.1.1.1629.1927.2955	Available	1		SRR8166009			PRJNA315192	3.6.1.1	CipR	strong	1.1.1.1.1629	No	No
SRR8176540	2018	F	> 60	England	Yes	Unknown	1.1.1.1.1629.1927.2966	Available	1		SRR8176540			PRJNA315192	3.6.1.1	CipR	strong	1.1.1.1.1629	No	No
SRR8172609	2018	M	< 16	England	Unknown	N/A	1.1.1.1.1631.1929.2958	Available	1		SRR8172609			PRJNA315192	3.6.1.1	CipR	strong	1.1.1.1.1631	No	No
SRR8263043	2018	F	> 60	England	Yes	Asia	1.1.1.1.1649.1954.3008	Available	1		SRR8263043			PRJNA315192	3.6.1.1	CipR	strong	1.1.1.1.1649	No	No
SRR8325548	2018	F	16 - 60	England	No	N/A	1.1.1.1.1667.1975.3047	Available	1		SRR8325548			PRJNA315192	3.6.1.1	CipR	strong	1.1.1.1.1667	No	No
SRR8366128	2018	F	16 - 60	England	No	N/A	1.1.1.1.1667.1984.3067	Available	1		SRR8366128			PRJNA315192	3.6.1.1	CipR	strong	1.1.1.1.1667	No	No
SRR8523758	2019	M	16 - 60	England	Yes	Asia	1.1.1.1.1693.2009.3129	Available	1		SRR8523758			PRJNA315192	3.6.1.1	CipR	strong	1.1.1.1.1693	No	No
SRR9311812	2019	F	16 - 60	England	Unknown	N/A	1.1.1.1.1773.2135.3351	Available	1		SRR9311812			PRJNA315192	3.6.1.1	CipR	strong	1.1.1.1.1773	No	No
SRR9845581	2019	F	> 60	England	Unknown	N/A	1.1.1.1.1790.2168.3411	Available	1		SRR9845581			PRJNA315192	3.6.1.1	CipR	moderate	1.1.1.1.1790	No	No
SRR9961607	2019	F	16 - 60	England	Yes	Asia	1.1.1.1.1805.2189.3445	Available	1		SRR9961607			PRJNA315192	3.6.1.1	CipR	strong	1.1.1.1.1805	No	No
SRR10037531	2019	M	> 60	England	Unknown	N/A	1.1.1.1.1814.2205.3472	Available	1		SRR10037531			PRJNA315192	3.6.1.1	CipR	strong	1.1.1.1.1814	No	No
SRR10088450	2019	F	16 - 60	England	Unknown	N/A	1.1.1.1.1814.2205.3472	Available	1		SRR10088450			PRJNA315192	3.6.1.1	CipR	strong	1.1.1.1.1814	No	No
SRR10352168	2019	M	16 - 60	England	Yes	Asia	1.1.1.1.1814.2205.3711	Available	1		SRR10352168			PRJNA315192	3.6.1.1	CipR	strong	1.1.1.1.1814	No	No
SRR10228527	2019	F	16 - 60	England	Unknown	N/A	1.1.1.1.1851.2257.3572	Available	1		SRR10228527			PRJNA315192	3.6.1.1	CipR	strong	1.1.1.1.1851	No	No
SRR10312194	2019	M	< 16	England	Yes	Asia	1.1.1.1.1874.2292.3694	Available	1		SRR10312194			PRJNA315192	3.6.1.1	CipR	strong	1.1.1.1.1874	No	No
SRR10312197	2019	F	16 - 60	England	Unknown	N/A	1.1.1.1.1875.2293.3695	Available	1		SRR10312197			PRJNA315192	3.6.1.1	CipR	strong	1.1.1.1.1875	No	No
SRR10431583	2019	M	> 60	England	Unknown	N/A	1.1.1.1.1892.2320.3743	Available	1		SRR10431583			PRJNA315192	3.6.1.1	CipR	strong	1.1.1.1.1892	No	No
SRR10513252	2019	F	> 60	England	Yes	Asia	1.1.1.1.1892.2320.3743	Available	1		SRR10513252			PRJNA315192	3.6.1.1	CipR	strong	1.1.1.1.1892	No	No
SRR10519436	2019	F	> 60	England	Yes	Asia	1.1.1.1.1892.2320.3775	Available	1		SRR10519436			PRJNA315192	3.6.1.1	CipR	strong	1.1.1.1.1892	No	No
SRR10559575	2019	F	16 - 60	England	Yes	Asia	1.1.1.1.1909.2353.3795	Available	1		SRR10559575			PRJNA315192	3.6.1.1	CipR	strong	1.1.1.1.1909	No	No
SRR10693122	2019	M	> 60	England	Yes	Asia	1.1.1.1.1916.2364.3814	Available	1		SRR10693122			PRJNA315192	3.6.1.1	CipR	strong	1.1.1.1.1916	No	No
SRR11142357	2020	F	> 60	England	Yes	Asia	1.1.1.1.1965.2439.3940	Available	1		SRR11142357			PRJNA315192	3.6.1.1	CipR	strong	1.1.1.1.1965	No	No
SRR7179968	2017	M	16 - 60	England	No	N/A	1.1.1.1.252.1161.1678	Available	1		SRR7179968			PRJNA315192	3.6.1.1	CipR	strong	1.1.1.1.252	No	No
SRR7191644	2016	M	16 - 60	England	Unknown	N/A	1.1.1.1.252.1161.1517	Available	1		SRR7191644			PRJNA315192	3.6.1.1	CipR	strong	1.1.1.1.252	No	No
SRR7236604	2016	F	16 - 60	England	No	N/A	1.1.1.1.252.1161.1532	Available	1		SRR7236604			PRJNA315192	3.6.1.1	CipR	strong	1.1.1.1.252	No	No
SRR7291927	2016	M	16 - 60	England	Unknown	N/A	1.1.1.1.252.1161.1512	Available	1		SRR7291927			PRJNA315192	3.6.1.1	CipR	strong	1.1.1.1.252	No	No
SRR7277756	2017	F	16 - 60	England	Unknown	N/A	1.1.1.1.277.1340.1809	Available	1		SRR7277756			PRJNA315192	3.6.1.1	CipR	strong	1.1.1.1.277	No	No
SRR3531890	2016	F	> 60	England	No	N/A	1.1.1.1.331.458.813	Available	1		SRR3531890			PRJNA315192	3.6.1.1	CipR	strong	1.1.1.1.331	No	No
SRR4788253	2016	F	16 - 60	England	Unknown	N/A	1.1.1.1.331.458.958	Available	1		SRR4788253			PRJNA315192	3.6.1.1	CipR	strong	1.1.1.1.331	No	No
SRR4897306	2016	M	16 - 60	England	No	N/A	1.1.1.1.331.458.813	Available	1		SRR4897306			PRJNA315192	3.6.1.1	CipR	strong	1.1.1.1.331	No	No
SRR7187532	2017	F	< 16	England	No	N/A	1.1.1.1.331.1388.1899	Available	1		SRR7187532			PRJNA315192	3.6.1.1	CipR	strong	1.1.1.1.331	No	No
SRR7256984	2018	M	< 16	England	Yes	Asia	1.1.1.1.331.458.2315	Available	1		SRR7256984			PRJNA315192	3.6.1.1	CipR	strong	1.1.1.1.331	No	No
SRR7276888	2017	F	> 60	England	Unknown	N/A	1.1.1.1.331.1320.1771	Available	1		SRR7276888			PRJNA315192	3.6.1.1	CipR	strong	1.1.1.1.331	No	No
SRR7276963	2017	F	16 - 60	England	Yes	Asia	1.1.1.1.331.1363.1856	Available	1		SRR7276963			PRJNA315192	3.6.1.1	CipR	strong	1.1.1.1.331	No	No
SRR7286183	2017	M	16 - 60	England	Yes	Africa	1.1.1.1.331.1411.1940	Available	1		SRR7286183			PRJNA315192	3.6.1.1	CipR	strong	1.1.1.1.331	No	No
SRR7286456	2018	M	16 - 60	England	Unknown	N/A	1.1.1.1.331.1628.2370	Available	1		SRR7286456			PRJNA315192	3.6.1.1	CipR	strong	1.1.1.1.331	No	No
SRR7291658	2017	F	16 - 60	England	Yes	Asia	1.1.1.1.331.1411.1940	Available	1		SRR7291658			PRJNA315192	3.6.1.1	CipR	strong	1.1.1.1.331	No	No
SRR7291672	2017	M	< 16	England	Unknown	N/A	1.1.1.1.331.1363.1924	Available	1		SRR7291672			PRJNA315192	3.6.1.1	CipR	strong	1.1.1.1.331	No	No
SRR7367214	2018	F	> 60	England	Yes	Asia	1.1.1.1.331.458.2315	Available	1		SRR7367214			PRJNA315192	3.6.1.1	CipR	strong	1.1.1.1.331	No	No
SRR7367546	2018	M	16 - 60	England	Yes	Asia	1.1.1.1.331.458.2218	Available	1		SRR7367546			PRJNA315192	3.6.1.1	CipR	strong	1.1.1.1.331	No	No
SRR7588695	2018	M	16 - 60	England	Yes	Asia	1.1.1.1.331.458.2538	Available	1		SRR7588695			PRJNA315192	3.6.1.1	CipR	strong	1.1.1.1.331	No	No
SRR8440734	2018	M	16 - 60	England	Yes	Asia	1.1.1.1.331.2000.3108	Available	1		SRR8440734			PRJNA315192	3.6.1.1	CipR	strong	1.1.1.1.331	No	No
SRR8513687	2019	F	16 - 60	England	Yes	Asia	1.1.1.1.331.2012.3132	Available	1		SRR8513687			PRJNA315192	3.6.1.1	CipR	strong	1.1.1.1.331	No	No
SRR8981797	2019	F	16 - 60	England	Yes	Asia	1.1.1.1.331.2080.3258	Available	1		SRR8981797			PRJNA315192	3.6.1.1	CipR	strong	1.1.1.1.331	No	No
SRR3530568	2016	M	16 - 60	England	Unknown	N/A	1.1.1.1.474.517.747	Available	1		SRR3530568			PRJNA315192	3.6.1.1	CipR	strong	1.1.1.1.474	No	No
SRR3530612	2016	M	16 - 60	England	Unknown	N/A	1.1.1.1.474.517.666	Available	1		SRR3530612			PRJNA315192	3.6.1.1	CipR	strong	1.1.1.1.474	No	No
SRR3530614	2016	M	16 - 60	England	Unknown	N/A	1.1.1.1.474.517.764	Available	1		SRR3530614			PRJNA315192	3.6.1.1	CipR	strong	1.1.1.1.474	No	No
SRR4788259	2016	M	16 - 60	England	No	N/A	1.1.1.1.474.517.666	Available	1		SRR4788259			PRJNA315192	3.6.1.1	CipR	strong	1.1.1.1.474	No	No
SRR7230345	2016	M	16 - 60	England	Unknown	N/A	1.1.1.1.474.517.1528	Available	1		SRR7230345			PRJNA315192	3.6.1.1	CipR	strong	1.1.1.1.474	No	No
SRR4195769	2016	F	16 - 60	England	Unknown	N/A	1.1.1.1.477.521.671	Available	1		SRR4195769			PRJNA315192	3.6.1.1	CipR	strong	1.1.1.1.477	No	No
SRR3531885	2016	F	16 - 60	England	Yes	Asia	1.1.1.1.505.604.797	Available	1		SRR3531885			PRJNA315192	3.6.1.1	CipR	strong	1.1.1.1.505	No	No
SRR4897472	2016	M	16 - 60	England	Yes	Asia	1.1.1.1.505.553.716	Available	1		SRR4897472			PRJNA315192	3.6.1.1	CipR	strong	1.1.1.1.505	No	No
SRR3530608	2016	F	16 - 60	England	No	N/A	1.1.1.1.519.569.743	Available	1		SRR3530608			PRJNA315192	3.6.1.1	CipR	strong	1.1.1.1.519	No	No
SRR7187782	2017	F	16 - 60	England	No	N/A	1.1.1.1.519.1378.1882	Available	1		SRR7187782			PRJNA315192	3.6.1.1	CipR	strong	1.1.1.1.519	No	No
SRR7367384	2018	F	16 - 60	England	Yes	Unknown	1.1.1.1.519.1576.2246	Available	1		SRR7367384			PRJNA315192	3.6.1.1	CipR	strong	1.1.1.1.519	No	No
SRR9595006	2019	M	16 - 60	England	Unknown	N/A	1.1.1.1.519.2148.3372	Available	1		SRR9595006			PRJNA315192	3.6.1.1	CipR	strong	1.1.1.1.519	No	No
SRR9620978	2019	F	< 16	England	Unknown	N/A	1.1.1.1.519.2148.3372	Available	1		SRR9620978			PRJNA315192	3.6.1.1	CipR	strong	1.1.1.1.519	No	No
SRR9671539	2019	M	< 16	England	Unknown	N/A	1.1.1.1.519.2148.3372	Available	1		SRR9671539			PRJNA315192	3.6.1.1	CipR	strong	1.1.1.1.519	No	No
SRR9874790	2019	F	< 16	England	Unknown	N/A	1.1.1.1.519.2148.3372	Available	1		SRR9874790			PRJNA315192	3.6.1.1	CipR	strong	1.1.1.1.519	No	No
SRR9947467	2019	F	> 60	England	Unknown	N/A	1.1.1.1.519.2148.3372	Available	1		SRR9947467			PRJNA315192	3.6.1.1	CipR	strong	1.1.1.1.519	No	No
SRR3530625	2016	F	16 - 60	England	Yes	Asia	1.1.1.1.520.570.744	Available	1		SRR3530625			PRJNA315192	3.6.1.1	CipR	strong	1.1.1.1.520	No	No
SRR3531863	2016	F	> 60	England	Unknown	N/A	1.1.1.1.522.572.746	Available	1		SRR3531863			PRJNA315192	3.6.1.1.3	CipR	strong	1.1.1.1.522	No	No
SRR3530590	2016	M	> 60	England	Yes	Asia	1.1.1.1.532.583.770	Available	1		SRR3530590			PRJNA315192	3.6.1.1	CipR	strong	1.1.1.1.532	No	No
SRR3530859	2016	F	< 16	England	Unknown	N/A	1.1.1.1.553.611.810	Available	1		SRR3530859			PRJNA315192	3.6.1.1	CipR	strong	1.1.1.1.553	No	No
SRR3531508	2016	M	< 16	England	Unknown	N/A	1.1.1.1.553.611.811	Available	1		SRR3531508			PRJNA315192	3.6.1.1	CipR	strong	1.1.1.1.553	No	No
SRR3530395	2016	M	< 16	England	Yes	Asia	1.1.1.1.562.620.821	Available	1		SRR3530395			PRJNA315192	3.6.1.1	CipR	strong	1.1.1.1.562	No	No
SRR7187877	2017	F	16 - 60	England	Yes	Unknown	1.1.1.1.562.1401.1926	Available	1		SRR7187877			PRJNA315192	3.6.1.1	CipR	strong	1.1.1.1.562	No	No
SRR7236434	2018	F	16 - 60	England	Yes	Asia	1.1.1.1.562.1401.2323	Available	1		SRR7236434			PRJNA315192	3.6.1.1	CipR	strong	1.1.1.1.562	No	No
SRR5017524	2016	F	> 60	England	Yes	Asia	1.1.1.1.563.621.823	Available	1		SRR5017524			PRJNA315192	3.6.1.1	CipR	strong	1.1.1.1.563	No	No
SRR5005272	2016	M	16 - 60	England	Yes	Asia	1.1.1.1.576.636.852	Available	1		SRR5005272			PRJNA315192	3.6.1.1	CipR	strong	1.1.1.1.576	No	No
SRR5023928	2016	F	< 16	England	No	N/A	1.1.1.1.585.646.865	Available	1		SRR5023928			PRJNA315192	3.6.1.1	CipR	strong	1.1.1.1.585	No	No
SRR4788271	2016	F	16 - 60	England	Unknown	N/A	1.1.1.1.587.648.867	Available	1		SRR4788271			PRJNA315192	3.6.1.1	CipR	strong	1.1.1.1.587	No	No
SRR7221108	2017	F	16 - 60	England	Yes	Asia	1.1.1.1.587.1234.1639	Available	1		SRR7221108			PRJNA315192	3.6.1.1	CipR	strong	1.1.1.1.587	No	No
SRR7249783	2017	F	16 - 60	England	No	N/A	1.1.1.1.587.1398.1920	Available	1		SRR7249783			PRJNA315192	3.6.1.1	CipR	strong	1.1.1.1.587	No	No
SRR4787194	2016	M	16 - 60	England	Unknown	N/A	1.1.1.1.592.654.879	Available	1		SRR4787194			PRJNA315192	3.6.1.1	CipR	strong	1.1.1.1.592	No	No
SRR7223055	2017	F	16 - 60	England	Yes	Asia	1.1.1.1.592.1305.1752	Available	1		SRR7223055			PRJNA315192	3.6.1.1	CipR	strong	1.1.1.1.592	No	No
SRR3742271	2016	M	16 - 60	England	Unknown	N/A	1.1.1.1.606.670.905	Available	1		SRR3742271			PRJNA315192	3.6.1.1	CipR	strong	1.1.1.1.606	No	No
SRR4786997	2016	F	16 - 60	England	Unknown	N/A	1.1.1.1.610.676.913	Available	1		SRR4786997			PRJNA315192	3.6.1.1	CipR	strong	1.1.1.1.610	No	No
SRR4897664	2016	F	> 60	England	Unknown	N/A	1.1.1.1.621.688.931	Available	1		SRR4897664			PRJNA315192	3.6.1.1	CipR	strong	1.1.1.1.621	No	No
SRR4897651	2016	M	16 - 60	England	Unknown	N/A	1.1.1.1.644.723.984	Available	1		SRR4897651			PRJNA315192	3.6.1.1	CipR	strong	1.1.1.1.644	No	No
SRR7274815	2017	F	16 - 60	England	Yes	Asia	1.1.1.1.644.723.2099	Available	1		SRR7274815			PRJNA315192	3.6.1.1	CipR	strong	1.1.1.1.644	No	No
SRR9961609	2019	M	< 16	England	Unknown	N/A	1.1.1.1.644.2190.3447	Available	1		SRR9961609			PRJNA315192	3.6.1.1	CipR	strong	1.1.1.1.644	No	No
SRR4787433	2016	M	16 - 60	England	Yes	Asia	1.1.1.1.647.727.994	Available	1		SRR4787433			PRJNA315192	3.6.1.1	CipR	strong	1.1.1.1.647	No	No
SRR5006355	2016	M	16 - 60	England	No	N/A	1.1.1.1.669.749.1030	Available	1		SRR5006355			PRJNA315192	3.6.1.1	CipR	strong	1.1.1.1.669	No	No
SRR7286558	2016	M	> 60	England	Unknown	N/A	1.1.1.1.669.1201.1573	Available	1		SRR7286558			PRJNA315192	3.6.1.1	CipR	strong	1.1.1.1.669	No	No
SRR7826976	2018	M	16 - 60	England	Unknown	N/A	1.1.1.1.669.1809.2705	Available	1		SRR7826976			PRJNA315192	3.6.1.1	CipR	strong	1.1.1.1.669	No	No
SRR8832711	2019	F	> 60	England	Yes	Asia	1.1.1.1.669.2054.3217	Available	1		SRR8832711			PRJNA315192	3.6.1.1	CipR	strong	1.1.1.1.669	No	No
SRR4897609	2016	F	16 - 60	England	Yes	Asia	1.1.1.1.696.781.1079	Available	1		SRR4897609			PRJNA315192	3.6.1.1	CipR	strong	1.1.1.1.696	No	No
SRR5006418	2016	F	< 16	England	No	N/A	1.1.1.1.697.782.1080	Available	1		SRR5006418			PRJNA315192	3.6.1.1	CipR	strong	1.1.1.1.697	No	No
SRR7236683	2016	F	> 60	England	Unknown	N/A	1.1.1.1.708.795.1098	Available	1		SRR7236683			PRJNA315192	3.6.1.1	CipR	strong	1.1.1.1.708	No	No
SRR7230334	2016	M	> 60	England	Yes	Asia	1.1.1.1.713.801.1114	Available	1		SRR7230334			PRJNA315192	3.6.1.1	CipR	strong	1.1.1.1.713	No	No
SRR9306477	2019	F	> 60	England	No	N/A	1.1.1.1002.1771.2133.3348	Available	1		SRR9306477			PRJNA315192	3.6.1.1	CipR	strong	1.1.1.1002.1771	No	No
SRR10019158	2019	M	> 60	England	Yes	Asia	1.1.1.1002.1812.2203.3470	Available	1		SRR10019158			PRJNA315192	3.6.1.1	CipR	strong	1.1.1.1002.1812	No	No
SRR9620974	2019	F	> 60	England	Unknown	N/A	1.1.1.1007.1783.2152.3380	Available	1		SRR9620974			PRJNA315192	3.6.1.1	CipR	strong	1.1.1.1007.1783	No	No
SRR9662125	2019	M	> 60	England	No	N/A	1.1.1.1007.1783.2152.3380	Available	1		SRR9662125			PRJNA315192	3.6.1.1	CipR	strong	1.1.1.1007.1783	No	No
SRR9671541	2019	F	16 - 60	England	Unknown	N/A	1.1.1.1007.1783.2152.3380	Available	1		SRR9671541			PRJNA315192	3.6.1.1	CipR	strong	1.1.1.1007.1783	No	No
SRR9886013	2019	F	16 - 60	England	Unknown	N/A	1.1.1.1012.1794.2174.3423	Available	1		SRR9886013			PRJNA315192	3.6.1.1	CipR	strong	1.1.1.1012.1794	No	No
SRR10088467	2019	F	16 - 60	England	Yes	Asia	1.1.1.1018.1825.2220.3495	Available	1		SRR10088467			PRJNA315192	3.6.1.1	CipR	strong	1.1.1.1018.1825	No	No
SRR10088468	2019	F	16 - 60	England	Unknown	N/A	1.1.1.1018.1825.2220.3501	Available	1		SRR10088468			PRJNA315192	3.6.1.1	CipR	strong	1.1.1.1018.1825	No	No
SRR10212177	2019	M	< 16	England	Unknown	N/A	1.1.1.1021.1837.2236.3539	Available	1		SRR10212177			PRJNA315192	3.6.1.1	CipR	strong	1.1.1.1021.1837	No	No
SRR10228151	2019	M	16 - 60	England	Unknown	N/A	1.1.1.1023.1842.2244.3551	Available	1		SRR10228151			PRJNA315192	3.6.1.1	CipR	strong	1.1.1.1023.1842	No	No
SRR10312182	2019	M	< 16	England	Yes	Asia	1.1.1.1031.1872.2290.3692	Available	1		SRR10312182			PRJNA315192	3.6.1.1	CipR	strong	1.1.1.1031.1872	No	No
SRR7274798	2016	F	16 - 60	England	Yes	Asia	1.1.1.104.1035.1145.1488	Available	1		SRR7274798			PRJNA315192	3.6.1.1	CipR	strong	1.1.1.104.1035	No	No
SRR7291622	2016	M	16 - 60	England	Unknown	N/A	1.1.1.104.1035.1145.1483	Available	1		SRR7291622			PRJNA315192	3.6.1.1	CipR	strong	1.1.1.104.1035	No	No
SRR10527348	2019	F	16 - 60	England	Yes	Asia	1.1.1.1042.1907.2350.3790	Available	1		SRR10527348			PRJNA315192	3.6.1.1	CipR	strong	1.1.1.1042.1907	No	No
SRR10605712	2019	F	16 - 60	England	Yes	Unknown	1.1.1.1044.1913.2359.3806	Available	1		SRR10605712			PRJNA315192	3.6.1.1	CipR	strong	1.1.1.1044.1913	No	No
SRR11215240	2020	F	16 - 60	England	Unknown	N/A	1.1.1.1044.1976.2452.3958	Available	1		SRR11215240			PRJNA315192	3.6.1.1	CipR	strong	1.1.1.1044.1976	No	No
SRR10806404	2019	M	< 16	England	Unknown	N/A	1.1.1.1054.1932.2386.3852	Available	1		SRR10806404			PRJNA315192	3.6.1.1	CipR	strong	1.1.1.1054.1932	No	No
SRR10985489	2020	F	16 - 60	England	Yes	Asia	1.1.1.1059.1948.2411.3896	Available	1		SRR10985489			PRJNA315192	3.6.1.1	CipR	strong	1.1.1.1059.1948	No	No
SRR11048312	2020	F	16 - 60	England	Unknown	N/A	1.1.1.1062.1955.2425.3919	Available	1		SRR11048312			PRJNA315192	3.6.1.1	CipR	strong	1.1.1.1062.1955	No	No
SRR11479016	2020	F	16 - 60	England	Yes	Asia	1.1.1.1077.1986.2464.3987	Available	1		SRR11479016			PRJNA315192	3.6.1.1	CipR	strong	1.1.1.1077.1986	No	No
SRR7839338	2018	M	16 - 60	England	Yes	Asia	1.1.1.208.1559.1827.2754	Available	1		SRR7839338			PRJNA315192	3.6.1.1	CipR	strong	1.1.1.208.1559	No	No
SRR7172157	2016	M	16 - 60	England	Yes	Asia	1.1.1.208.243.871.1193	Available	1		SRR7172157			PRJNA315192	3.6.1.1	CipR	strong	1.1.1.208.243	No	No
SRR4897483	2016	F	16 - 60	England	Unknown	N/A	1.1.1.208.656.740.1039	Available	1		SRR4897483			PRJNA315192	3.6.1.1	CipR	strong	1.1.1.208.656	No	No
SRR10519460	2019	M	< 16	England	Yes	Asia	1.1.1.265.1082.2338.3767	Available	1		SRR10519460			PRJNA315192	3.6.1.1	CipR	strong	1.1.1.265.1082	No	No
SRR7286685	2016	M	16 - 60	England	No	N/A	1.1.1.265.1082.1200.1572	Available	1		SRR7286685			PRJNA315192	3.6.1.1	CipR	strong	1.1.1.265.1082	No	No
SRR7367562	2017	F	< 16	England	Yes	Asia	1.1.1.265.1087.1212.1585	Available	1		SRR7367562			PRJNA315192	3.6.1.1	CipR	strong	1.1.1.265.1087	No	No
SRR7187784	2017	F	16 - 60	England	Yes	Asia	1.1.1.265.1104.1232.1637	Available	1		SRR7187784			PRJNA315192	3.6.1.1	CipR	strong	1.1.1.265.1104	No	No
SRR7249707	2017	M	16 - 60	England	Yes	Asia	1.1.1.265.1137.1279.1718	Available	1		SRR7249707			PRJNA315192	3.6.1.1	CipR	strong	1.1.1.265.1137	No	No
SRR7187822	2017	F	16 - 60	England	Yes	Asia	1.1.1.265.1157.1310.1757	Available	1		SRR7187822			PRJNA315192	3.6.1.1	CipR	strong	1.1.1.265.1157	No	No
SRR7283754	2017	F	16 - 60	England	No	N/A	1.1.1.265.1176.1334.1802	Available	1		SRR7283754			PRJNA315192	3.6.1.1	CipR	strong	1.1.1.265.1176	No	No
SRR7249736	2017	F	< 16	England	Yes	Asia	1.1.1.265.1205.1370.1869	Available	1		SRR7249736			PRJNA315192	3.6.1.1	CipR	strong	1.1.1.265.1205	No	No
SRR7286388	2017	F	16 - 60	England	Unknown	N/A	1.1.1.265.1224.1397.1917	Available	1		SRR7286388			PRJNA315192	3.6.1.1	CipR	strong	1.1.1.265.1224	No	No
SRR7286600	2017	M	16 - 60	England	Yes	Asia	1.1.1.265.1228.1406.1933	Available	1		SRR7286600			PRJNA315192	3.6.1.1	CipR	strong	1.1.1.265.1228	No	No
SRR7265741	2017	F	16 - 60	England	Yes	Asia	1.1.1.265.1240.1421.1958	Available	1		SRR7265741			PRJNA315192	3.6.1.1	CipR	strong	1.1.1.265.1240	No	No
SRR7172304	2017	F	> 60	England	Yes	Asia	1.1.1.265.1316.1520.2125	Available	1		SRR7172304			PRJNA315192	3.6.1.1	CipR	strong	1.1.1.265.1316	No	No
SRR7291637	2018	M	> 60	England	No	N/A	1.1.1.265.1316.1520.2125	Available	1		SRR7291637			PRJNA315192	3.6.1.1	CipR	strong	1.1.1.265.1316	No	No
SRR11041540	2020	F	16 - 60	England	Unknown	N/A	1.1.1.265.1326.2422.3912	Available	1		SRR11041540			PRJNA315192	3.6.1.1	CipR	strong	1.1.1.265.1326	No	No
SRR7184221	2017	M	16 - 60	England	No	N/A	1.1.1.265.1326.1535.2157	Available	1		SRR7184221			PRJNA315192	3.6.1.1	CipR	strong	1.1.1.265.1326	No	No
SRR7277760	2018	M	16 - 60	England	Yes	Asia	1.1.1.265.1340.1553.2197	Available	1		SRR7277760			PRJNA315192	3.6.1.1	CipR	strong	1.1.1.265.1340	No	No
SRR7850069	2018	F	16 - 60	England	Yes	Asia	1.1.1.265.1340.1820.2740	Available	1		SRR7850069			PRJNA315192	3.6.1.1	CipR	strong	1.1.1.265.1340	No	No
SRR7184354	2018	F	16 - 60	England	Unknown	N/A	1.1.1.265.1377.1604.2312	Available	1		SRR7184354			PRJNA315192	3.6.1.1	CipR	strong	1.1.1.265.1377	No	No
SRR7179818	2018	M	16 - 60	England	Unknown	N/A	1.1.1.265.1381.1608.2321	Available	1		SRR7179818			PRJNA315192	3.6.1.1	CipR	strong	1.1.1.265.1381	No	No
SRR7204364	2018	M	16 - 60	England	Unknown	N/A	1.1.1.265.1381.1608.2338	Available	1		SRR7204364			PRJNA315192	3.6.1.1	CipR	strong	1.1.1.265.1381	No	No
SRR7836285	2018	M	16 - 60	England	Unknown	N/A	1.1.1.265.1548.1811.2713	Available	1		SRR7836285			PRJNA315192	3.6.1.1	CipR	strong	1.1.1.265.1548	No	No
SRR7842081	2018	M	> 60	England	No	N/A	1.1.1.265.1548.1811.2752	Available	1		SRR7842081			PRJNA315192	3.6.1.1	CipR	strong	1.1.1.265.1548	No	No
SRR7850014	2018	F	> 60	England	Unknown	N/A	1.1.1.265.1548.1811.2713	Available	1		SRR7850014			PRJNA315192	3.6.1.1	CipR	strong	1.1.1.265.1548	No	No
SRR8240408	2018	F	16 - 60	England	Yes	Europe	1.1.1.265.1548.1811.3004	Available	1		SRR8240408			PRJNA315192	3.6.1.1	CipR	strong	1.1.1.265.1548	No	No
SRR7896003	2018	M	16 - 60	England	Unknown	N/A	1.1.1.265.1579.1851.2806	Available	1		SRR7896003			PRJNA315192	3.6.1.1	CipR	strong	1.1.1.265.1579	No	No
SRR7974374	2018	F	< 16	England	Yes	Asia	1.1.1.265.1595.1878.2850	Available	1		SRR7974374			PRJNA315192	3.6.1.1	CipR	strong	1.1.1.265.1595	No	No
SRR8086731	2018	F	< 16	England	Yes	Unknown	1.1.1.265.1613.1901.2900	Available	1		SRR8086731			PRJNA315192	3.6.1.1	CipR	strong	1.1.1.265.1613	No	No
SRR8148967	2018	M	16 - 60	England	Unknown	N/A	1.1.1.265.1621.1917.2938	Available	1		SRR8148967			PRJNA315192	3.6.1.1	CipR	strong	1.1.1.265.1621	No	No
SRR11142351	2020	M	16 - 60	England	No	N/A	1.1.1.265.1635.2437.3938	Available	1		SRR11142351			PRJNA315192	3.6.1.1	CipR	strong	1.1.1.265.1635	No	No
SRR8181843	2018	M	16 - 60	England	Yes	Asia	1.1.1.265.1635.1933.2968	Available	1		SRR8181843			PRJNA315192	3.6.1.1	CipR	strong	1.1.1.265.1635	No	No
SRR9260671	2019	F	16 - 60	England	Yes	Asia	1.1.1.265.1635.2125.3332	Available	1		SRR9260671			PRJNA315192	3.6.1.1	CipR	strong	1.1.1.265.1635	No	No
SRR8490601	2019	M	16 - 60	England	Unknown	N/A	1.1.1.265.1692.2007.3125	Available	1		SRR8490601			PRJNA315192	3.6.1.1	CipR	strong	1.1.1.265.1692	No	No
SRR8540691	2019	F	16 - 60	England	Unknown	N/A	1.1.1.265.1696.2017.3146	Available	1		SRR8540691			PRJNA315192	3.6.1.1	CipR	strong	1.1.1.265.1696	No	No
SRR8878470	2019	F	16 - 60	England	Unknown	N/A	1.1.1.265.1727.2061.3229	Available	1		SRR8878470			PRJNA315192	3.6.1.1	CipR	strong	1.1.1.265.1727	No	No
SRR10120190	2019	F	< 16	England	Unknown	N/A	1.1.1.265.1829.2225.3515	Available	1		SRR10120190			PRJNA315192	3.6.1.1	CipR	strong	1.1.1.265.1829	No	No
SRR10283332	2019	F	< 16	England	No	N/A	1.1.1.265.1869.2286.3685	Available	1		SRR10283332			PRJNA315192	3.6.1.1	CipR	strong	1.1.1.265.1869	No	No
SRR11096692	2020	M	16 - 60	England	Yes	Europe	1.1.1.265.1959.2431.3928	Available	1		SRR11096692			PRJNA315192	3.6.1.1	CipR	strong	1.1.1.265.1959	No	No
SRR11361741	2020	M	16 - 60	England	Unknown	N/A	1.1.1.265.1959.2455.3964	Available	1		SRR11361741			PRJNA315192	3.6.1.1	CipR	strong	1.1.1.265.1959	No	No
SRR7274782	2017	M	16 - 60	England	Yes	Asia	1.1.1.265.315.1384.1893	Available	1		SRR7274782			PRJNA315192	3.6.1.1	CipR	strong	1.1.1.265.315	No	No
SRR10228564	2019	F	< 16	England	Yes	Asia	1.1.1.265.444.2287.3687	Available	1		SRR10228564			PRJNA315192	3.6.1.1	CipR	strong	1.1.1.265.444	No	No
SRR11425053	2020	F	16 - 60	England	Unknown	N/A	1.1.1.265.444.2460.3973	Available	1		SRR11425053			PRJNA315192	3.6.1.1	CipR	strong	1.1.1.265.444	No	No
SRR7285427	2017	F	16 - 60	England	Yes	Asia	1.1.1.265.444.473.1955	Available	1		SRR7285427			PRJNA315192	3.6.1.1	CipR	strong	1.1.1.265.444	No	No
SRR7850039	2018	F	16 - 60	England	Yes	Asia	1.1.1.265.444.1822.2744	Available	1		SRR7850039			PRJNA315192	3.6.1.1	CipR	strong	1.1.1.265.444	No	No
SRR7873473	2018	F	16 - 60	England	Unknown	N/A	1.1.1.265.444.1822.2744	Available	1		SRR7873473			PRJNA315192	3.6.1.1	CipR	strong	1.1.1.265.444	No	No
SRR3530575	2016	F	> 60	England	Yes	Asia	1.1.1.265.556.614.815	Available	1		SRR3530575			PRJNA315192	3.6.1.1	CipR	strong	1.1.1.265.556	No	No
SRR4788242	2016	M	16 - 60	England	Yes	Asia	1.1.1.265.636.708.965	Available	1		SRR4788242			PRJNA315192	3.6.1.1	CipR	strong	1.1.1.265.636	No	No
SRR7204421	2016	M	16 - 60	England	Yes	Asia	1.1.1.265.661.745.1024	Available	1		SRR7204421			PRJNA315192	3.6.1.1	CipR	strong	1.1.1.265.661	No	No
SRR7367237	2018	M	< 16	England	Yes	Asia	1.1.1.27.1386.1614.2333	Available	1		SRR7367237			PRJNA315192	3.6.1.1	CipR	strong	1.1.1.27.1386	No	No
SRR7892545	2018	F	< 16	England	Yes	Unknown	1.1.1.27.1583.1857.2815	Available	1		SRR7892545			PRJNA315192	3.6.1.1	CipR	strong	1.1.1.27.1583	No	No
SRR7221288	2016	F	> 60	England	Yes	Asia	1.1.1.27.714.802.1115	Available	1		SRR7221288			PRJNA315192	3.6.1.1	CipR	strong	1.1.1.27.714	No	No
SRR7221279	2016	F	16 - 60	England	Unknown	N/A	1.1.1.276.1055.1168.1522	Available	1		SRR7221279			PRJNA315192	3.6.1.1	CipR	strong	1.1.1.276.1055	No	No
SRR7236619	2017	M	16 - 60	England	Yes	Asia	1.1.1.276.1138.1280.1719	Available	1		SRR7236619			PRJNA315192	3.6.1.1	CipR	strong	1.1.1.276.1138	No	No
SRR10874266	2020	M	16 - 60	England	No	N/A	1.1.1.276.1354.2396.3870	Available	1		SRR10874266			PRJNA315192	3.6.1.1	CipR	strong	1.1.1.276.1354	No	No
SRR7204453	2018	M	16 - 60	England	Yes	Africa	1.1.1.276.1354.1571.2288	Available	1		SRR7204453			PRJNA315192	3.6.1.1	CipR	strong	1.1.1.276.1354	No	No
SRR7266772	2018	M	16 - 60	England	Unknown	N/A	1.1.1.276.1354.1571.2288	Available	1		SRR7266772			PRJNA315192	3.6.1.1	CipR	strong	1.1.1.276.1354	No	No
SRR7537586	2018	F	> 60	England	Unknown	N/A	1.1.1.276.1354.1571.2459	Available	1		SRR7537586			PRJNA315192	3.6.1.1	CipR	strong	1.1.1.276.1354	No	No
SRR8097459	2018	F	> 60	England	No	N/A	1.1.1.276.1354.1571.2902	Available	1		SRR8097459			PRJNA315192	3.6.1.1	CipR	strong	1.1.1.276.1354	No	No
SRR9018536	2019	F	< 16	England	Unknown	N/A	1.1.1.276.1354.1571.3267	Available	1		SRR9018536			PRJNA315192	3.6.1.1	CipR	strong	1.1.1.276.1354	No	No
SRR7439137	2018	F	16 - 60	England	Yes	Oceania	1.1.1.276.1419.1653.2417	Available	1		SRR7439137			PRJNA315192	3.6.1.1	CipR	strong	1.1.1.276.1419	No	No
SRR8381972	2018	F	> 60	England	Yes	Asia	1.1.1.276.1419.1989.3080	Available	1		SRR8381972			PRJNA315192	3.6.1.1	CipR	strong	1.1.1.276.1419	No	No
SRR8457028	2019	F	> 60	England	Yes	Asia	1.1.1.276.1419.1989.3118	Available	1		SRR8457028			PRJNA315192	3.6.1.1	CipR	strong	1.1.1.276.1419	No	No
SRR10219474	2019	M	16 - 60	England	Unknown	N/A	1.1.1.276.1838.2237.3540	Available	1		SRR10219474			PRJNA315192	3.6.1.1	CipR	strong	1.1.1.276.1838	No	No
SRR4897615	2016	M	16 - 60	England	Yes	Asia	1.1.1.276.332.695.1003	Available	1		SRR4897615			PRJNA315192	3.6.1.1	CipR	strong	1.1.1.276.332	No	No
SRR5005517	2016	F	16 - 60	England	Unknown	N/A	1.1.1.276.332.690.933	Available	1		SRR5005517			PRJNA315192	3.6.1.1	CipR	strong	1.1.1.276.332	No	No
SRR7204210	2017	F	16 - 60	England	Yes	Asia	1.1.1.276.332.1430.1973	Available	1		SRR7204210			PRJNA315192	3.6.1.1	CipR	strong	1.1.1.276.332	No	No
SRR7274804	2016	M	> 60	England	Yes	Asia	1.1.1.276.332.695.939	Available	1		SRR7274804			PRJNA315192	3.6.1.1	CipR	strong	1.1.1.276.332	No	No
SRR7286535	2017	F	16 - 60	England	Yes	Asia	1.1.1.276.332.1301.1747	Available	1		SRR7286535			PRJNA315192	3.6.1.1	CipR	strong	1.1.1.276.332	No	No
SRR8936107	2019	F	16 - 60	England	Yes	Asia	1.1.1.276.332.2071.3246	Available	1		SRR8936107			PRJNA315192	3.6.1.1	CipR	strong	1.1.1.276.332	No	No
SRR9151834	2019	F	16 - 60	England	Yes	Asia	1.1.1.276.332.2071.3246	Available	1		SRR9151834			PRJNA315192	3.6.1.1	CipR	strong	1.1.1.276.332	No	No
SRR9595021	2019	M	16 - 60	England	Yes	Asia	1.1.1.276.332.2071.3374	Available	1		SRR9595021			PRJNA315192	3.6.1.1	CipR	strong	1.1.1.276.332	No	No
SRR7249754	2017	M	> 60	England	Yes	Asia	1.1.1.305.1147.1293.1735	Available	1		SRR7249754			PRJNA315192	3.6.1.1	CipR	strong	1.1.1.305.1147	No	No
SRR7179878	2016	F	16 - 60	England	Yes	Europe	1.1.1.307.1058.1171.1525	Available	1		SRR7179878			PRJNA315192	3.6.1.1	CipR	strong	1.1.1.307.1058	No	No
SRR7184245	2016	M	< 16	England	Unknown	N/A	1.1.1.307.1058.1171.1525	Available	1		SRR7184245			PRJNA315192	3.6.1.1	CipR	strong	1.1.1.307.1058	No	No
SRR7204393	2016	M	< 16	England	No	N/A	1.1.1.307.1058.1171.1525	Available	1		SRR7204393			PRJNA315192	3.6.1.1	CipR	strong	1.1.1.307.1058	No	No
SRR7283716	2017	F	16 - 60	England	Unknown	N/A	1.1.1.307.1058.1531.2146	Available	1		SRR7283716			PRJNA315192	3.6.1.1	CipR	strong	1.1.1.307.1058	No	No
SRR9018547	2019	M	16 - 60	England	Yes	Asia	1.1.1.307.1058.2087.3272	Available	1		SRR9018547			PRJNA315192	3.6.1.1	CipR	strong	1.1.1.307.1058	No	No
SRR7187859	2017	M	16 - 60	England	Unknown	N/A	1.1.1.307.1107.1462.2020	Available	1		SRR7187859			PRJNA315192	3.6.1.1	CipR	strong	1.1.1.307.1107	No	No
SRR7283771	2017	F	16 - 60	England	Yes	Asia	1.1.1.307.1107.1237.1645	Available	1		SRR7283771			PRJNA315192	3.6.1.1	CipR	strong	1.1.1.307.1107	No	No
SRR7285544	2017	M	16 - 60	England	Unknown	N/A	1.1.1.307.1107.1462.2044	Available	1		SRR7285544			PRJNA315192	3.6.1.1	CipR	strong	1.1.1.307.1107	No	No
SRR10049402	2019	F	16 - 60	England	Yes	Asia	1.1.1.307.397.2211.3484	Available	1		SRR10049402			PRJNA315192	3.6.1.1	CipR	strong	1.1.1.307.397	No	No
SRR4787360	2016	F	16 - 60	England	Unknown	N/A	1.1.1.307.397.725.987	Available	1		SRR4787360			PRJNA315192	3.6.1.1	CipR	strong	1.1.1.307.397	No	No
SRR4897194	2016	F	16 - 60	England	Yes	Asia	1.1.1.307.397.711.969	Available	1		SRR4897194			PRJNA315192	3.6.1.1	CipR	strong	1.1.1.307.397	No	No
SRR7184387	2016	M	> 60	England	Yes	Asia	1.1.1.307.397.1163.1515	Available	1		SRR7184387			PRJNA315192	3.6.1.1	CipR	strong	1.1.1.307.397	No	No
SRR7358267	2017	Unknown	< 16	England	Yes	Asia	1.1.1.312.404.1404.1931	Available	1		SRR7358267			PRJNA315192	3.6.1.1	CipR	strong	1.1.1.312.404	No	No
SRR4786055	2016	F	16 - 60	England	Yes	Asia	1.1.1.335.449.481.587	Available	1		SRR4786055			PRJNA315192	3.6.1.1	CipR	strong	1.1.1.335.449	No	No
SRR5005260	2016	F	16 - 60	England	Yes	Asia	1.1.1.335.449.481.785	Available	1		SRR5005260			PRJNA315192	3.6.1.1	CipR	strong	1.1.1.335.449	No	No
SRR5017975	2016	M	16 - 60	England	Yes	Asia	1.1.1.335.449.481.587	Available	1		SRR5017975			PRJNA315192	3.6.1.1	CipR	strong	1.1.1.335.449	No	No
SRR7358007	2017	M	16 - 60	England	Yes	Asia	1.1.1.338.1175.1333.1798	Available	1		SRR7358007			PRJNA315192	3.6.1.1	CipR	strong	1.1.1.338.1175	No	No
SRR7291596	2018	M	> 60	England	Unknown	N/A	1.1.1.338.1408.1640.2396	Available	1		SRR7291596			PRJNA315192	3.6.1.1	CipR	strong	1.1.1.338.1408	No	No
SRR7866261	2018	F	16 - 60	England	Yes	Asia	1.1.1.338.1577.1849.2797	Available	1		SRR7866261			PRJNA315192	3.6.1.1	CipR	strong	1.1.1.338.1577	No	No
SRR8117843	2018	F	16 - 60	England	Unknown	N/A	1.1.1.338.1619.1912.2929	Available	1		SRR8117843			PRJNA315192	3.6.1.1	CipR	strong	1.1.1.338.1619	No	No
SRR8366960	2018	M	< 16	England	Unknown	N/A	1.1.1.338.1619.1912.3063	Available	1		SRR8366960			PRJNA315192	3.6.1.1	CipR	strong	1.1.1.338.1619	No	No
SRR8547402	2019	F	> 60	England	No	N/A	1.1.1.338.1619.1912.3063	Available	1		SRR8547402			PRJNA315192	3.6.1.1	CipR	strong	1.1.1.338.1619	No	No
SRR8558502	2019	M	< 16	England	Unknown	N/A	1.1.1.338.1619.1912.3063	Available	1		SRR8558502			PRJNA315192	3.6.1.1	CipR	strong	1.1.1.338.1619	No	No
SRR9259742	2019	M	< 16	England	Yes	Asia	1.1.1.338.1619.1912.3255	Available	1		SRR9259742			PRJNA315192	3.6.1.1	CipR	strong	1.1.1.338.1619	No	No
SRR9988865	2019	F	16 - 60	England	Unknown	N/A	1.1.1.338.1619.2195.3457	Available	1		SRR9988865			PRJNA315192	3.6.1.1	CipR	strong	1.1.1.338.1619	No	No
SRR8176559	2018	M	> 60	England	Yes	Asia	1.1.1.338.1632.1930.2961	Available	1		SRR8176559			PRJNA315192	3.6.1.1	CipR	strong	1.1.1.338.1632	No	No
SRR8237825	2018	F	16 - 60	England	Yes	Europe	1.1.1.338.1644.1947.2994	Available	1		SRR8237825			PRJNA315192	3.6.1.1	CipR	strong	1.1.1.338.1644	No	No
SRR10858744	2019	M	< 16	England	Yes	Asia	1.1.1.338.1936.2395.3868	Available	1		SRR10858744			PRJNA315192	3.6.1.1	CipR	strong	1.1.1.338.1936	No	No
SRR10962101	2020	M	< 16	England	Yes	Asia	1.1.1.338.1947.2410.3890	Available	1		SRR10962101			PRJNA315192	3.6.1.1	CipR	strong	1.1.1.338.1947	No	No
SRR11215226	2020	F	> 60	England	Yes	Asia	1.1.1.338.1974.2450.3956	Available	1		SRR11215226			PRJNA315192	3.6.1.1	CipR	strong	1.1.1.338.1974	No	No
SRR10212225	2019	M	16 - 60	England	Unknown	N/A	1.1.1.338.452.484.3542	Available	1		SRR10212225			PRJNA315192	3.6.1.1	CipR	strong	1.1.1.338.452	No	No
SRR4786193	2016	M	16 - 60	England	Yes	Asia	1.1.1.338.452.607.801	Available	1		SRR4786193			PRJNA315192	3.6.1.1	CipR	strong	1.1.1.338.452	No	No
SRR4787736	2016	F	16 - 60	England	Yes	Asia	1.1.1.338.452.484.804	Available	1		SRR4787736			PRJNA315192	3.6.1.1	CipR	strong	1.1.1.338.452	No	No
SRR4788102	2016	M	16 - 60	England	Unknown	N/A	1.1.1.338.452.484.930	Available	1		SRR4788102			PRJNA315192	3.6.1.1	CipR	strong	1.1.1.338.452	No	No
SRR4897456	2016	F	16 - 60	England	Unknown	N/A	1.1.1.338.452.484.1010	Available	1		SRR4897456			PRJNA315192	3.6.1.1	CipR	strong	1.1.1.338.452	No	No
SRR7187031	2018	M	16 - 60	England	Yes	Asia	1.1.1.338.452.1600.2304	Available	1		SRR7187031			PRJNA315192	3.6.1.1	CipR	strong	1.1.1.338.452	No	No
SRR7191550	2018	M	16 - 60	England	Unknown	N/A	1.1.1.338.452.484.2200	Available	1		SRR7191550			PRJNA315192	3.6.1.1	CipR	strong	1.1.1.338.452	No	No
SRR7204398	2017	M	> 60	England	Yes	Asia	1.1.1.338.452.1351.2154	Available	1		SRR7204398			PRJNA315192	3.6.1.1	CipR	strong	1.1.1.338.452	No	No
SRR7244224	2017	F	16 - 60	England	Yes	Asia	1.1.1.338.452.1351.1834	Available	1		SRR7244224			PRJNA315192	3.6.1.1	CipR	strong	1.1.1.338.452	No	No
SRR7249521	2017	M	16 - 60	England	Yes	Asia	1.1.1.338.452.1528.2139	Available	1		SRR7249521			PRJNA315192	3.6.1.1	CipR	strong	1.1.1.338.452	No	No
SRR7249724	2016	F	16 - 60	England	Yes	Asia	1.1.1.338.452.484.590	Available	1		SRR7249724			PRJNA315192	3.6.1.1	CipR	strong	1.1.1.338.452	No	No
SRR7250953	2018	F	16 - 60	England	Unknown	N/A	1.1.1.338.452.484.2364	Available	1		SRR7250953			PRJNA315192	3.6.1.1	CipR	strong	1.1.1.338.452	No	No
SRR7283747	2017	M	16 - 60	England	Yes	Asia	1.1.1.338.452.1267.1698	Available	1		SRR7283747			PRJNA315192	3.6.1.1	CipR	strong	1.1.1.338.452	No	No
SRR7367422	2016	F	16 - 60	England	Yes	Asia	1.1.1.338.452.1144.1481	Available	1		SRR7367422			PRJNA315192	3.6.1.1	CipR	strong	1.1.1.338.452	No	No
SRR7826972	2018	M	16 - 60	England	Yes	Asia	1.1.1.338.452.1528.2703	Available	1		SRR7826972			PRJNA315192	3.6.1.1	CipR	strong	1.1.1.338.452	No	No
SRR7842121	2018	F	16 - 60	England	Unknown	N/A	1.1.1.338.452.1819.2738	Available	1		SRR7842121			PRJNA315192	3.6.1.1	CipR	strong	1.1.1.338.452	No	No
SRR7842176	2018	F	16 - 60	England	Unknown	N/A	1.1.1.338.452.1819.2738	Available	1		SRR7842176			PRJNA315192	3.6.1.1	CipR	strong	1.1.1.338.452	No	No
SRR8878832	2019	F	16 - 60	England	Yes	Asia	1.1.1.338.452.2059.3226	Available	1		SRR8878832			PRJNA315192	3.6.1.1	CipR	strong	1.1.1.338.452	No	No
SRR8979694	2019	M	16 - 60	England	Yes	Asia	1.1.1.338.452.2059.3253	Available	1		SRR8979694			PRJNA315192	3.6.1.1	CipR	strong	1.1.1.338.452	No	No
SRR7266765	2017	M	16 - 60	England	Unknown	N/A	1.1.1.342.1100.1227.1620	Available	1		SRR7266765			PRJNA315192	3.6.1.1	CipR	strong	1.1.1.342.1100	No	No
SRR7186968	2017	F	16 - 60	England	Yes	Asia	1.1.1.342.1132.1274.1712	Available	1		SRR7186968			PRJNA315192	3.6.1.1	CipR	strong	1.1.1.342.1132	No	No
SRR7249730	2017	M	16 - 60	England	Yes	Asia	1.1.1.342.1235.1415.1949	Available	1		SRR7249730			PRJNA315192	3.6.1.1	CipR	strong	1.1.1.342.1235	No	No
SRR7522840	2018	M	16 - 60	England	Yes	Asia	1.1.1.342.1431.1667.2447	Available	1		SRR7522840			PRJNA315192	3.6.1.1	CipR	strong	1.1.1.342.1431	No	No
SRR7842090	2018	F	16 - 60	England	Unknown	N/A	1.1.1.342.1538.1798.2671	Available	1		SRR7842090			PRJNA315192	3.6.1.1	CipR	strong	1.1.1.342.1538	No	No
SRR8366134	2018	F	> 60	England	Yes	Asia	1.1.1.342.1676.1985.3071	Available	1		SRR8366134			PRJNA315192	3.6.1.1	CipR	strong	1.1.1.342.1676	No	No
SRR10120188	2019	M	16 - 60	England	Yes	Asia	1.1.1.342.1830.2226.3516	Available	1		SRR10120188			PRJNA315192	3.6.1.1	CipR	strong	1.1.1.342.1830	No	No
SRR10357090	2019	F	> 60	England	Yes	Asia	1.1.1.342.1883.2304.3716	Available	1		SRR10357090			PRJNA315192	3.6.1.1	CipR	strong	1.1.1.342.1883	No	No
SRR10605730	2019	M	16 - 60	England	Unknown	N/A	1.1.1.342.1914.2360.3807	Available	1		SRR10605730			PRJNA315192	3.6.1.1	CipR	strong	1.1.1.342.1914	No	No
SRR3530561	2016	M	16 - 60	England	Yes	Asia	1.1.1.342.509.557.724	Available	1		SRR3530561			PRJNA315192	3.6.1.1	CipR	strong	1.1.1.342.509	No	No
SRR10231919	2019	F	16 - 60	England	Yes	Asia	1.1.1.355.1589.2235.3538	Available	1		SRR10231919			PRJNA315192	3.6.1.1	CipR	strong	1.1.1.355.1589	No	No
SRR7956011	2018	M	16 - 60	England	Yes	Asia	1.1.1.355.1589.1868.2838	Available	1		SRR7956011			PRJNA315192	3.6.1.1	CipR	strong	1.1.1.355.1589	No	No
SRR4195483	2016	M	16 - 60	England	Yes	Europe	1.1.1.355.475.519.668	Available	1		SRR4195483			PRJNA315192	3.6.1.1	CipR	strong	1.1.1.355.475	No	No
SRR7367466	2017	M	16 - 60	England	Yes	Africa	1.1.1.369.1196.1358.1848	Available	1		SRR7367466			PRJNA315192	3.6.1.1	CipR	strong	1.1.1.369.1196	No	No
SRR3530431	2016	F	16 - 60	England	Yes	Asia	1.1.1.369.494.541.697	Available	1		SRR3530431			PRJNA315192	3.6.1.1	CipR	strong	1.1.1.369.494	No	No
SRR3530414	2016	M	> 60	England	Yes	Asia	1.1.1.370.495.542.726	Available	1		SRR3530414			PRJNA315192	3.6.1.1	CipR	strong	1.1.1.370.495	No	No
SRR4897119	2016	M	16 - 60	England	Yes	Asia	1.1.1.370.495.542.699	Available	1		SRR4897119			PRJNA315192	3.6.1.1	CipR	strong	1.1.1.370.495	No	No
SRR3531868	2016	F	> 60	England	Yes	Asia	1.1.1.384.513.563.732	Available	1		SRR3531868			PRJNA315192	3.6.1.1	CipR	strong	1.1.1.384.513	No	No
SRR7866243	2018	F	16 - 60	England	Yes	Asia	1.1.1.391.1551.1814.2725	Available	1		SRR7866243			PRJNA315192	3.6.1.1.3	CipR	strong	1.1.1.391.1551	No	No
SRR7221118	2017	M	16 - 60	England	Unknown	N/A	1.1.1.391.523.1407.1934	Available	1		SRR7221118			PRJNA315192	3.6.1.1.3	CipR	strong	1.1.1.391.523	No	No
SRR7223058	2018	M	16 - 60	England	Yes	Asia	1.1.1.391.523.1551.2193	Available	1		SRR7223058			PRJNA315192	3.6.1.1.3	CipR	strong	1.1.1.391.523	No	No
SRR7230213	2017	M	16 - 60	England	Yes	Asia	1.1.1.391.523.1260.1686	Available	1		SRR7230213			PRJNA315192	3.6.1.1.3	CipR	strong	1.1.1.391.523	No	No
SRR7266758	2017	F	< 16	England	Yes	Asia	1.1.1.391.523.1260.1686	Available	1		SRR7266758			PRJNA315192	3.6.1.1.3	CipR	strong	1.1.1.391.523	No	No
SRR7283678	2017	M	16 - 60	England	Unknown	N/A	1.1.1.391.523.1295.1737	Available	1		SRR7283678			PRJNA315192	3.6.1.1.3	CipR	strong	1.1.1.391.523	No	No
SRR3530538	2016	F	16 - 60	England	Yes	Asia	1.1.1.396.530.581.767	Available	1		SRR3530538			PRJNA315192	3.6.1.1	CipR	strong	1.1.1.396.530	No	No
SRR4787145	2016	F	16 - 60	England	Yes	Asia	1.1.1.400.539.592.781	Available	1		SRR4787145			PRJNA315192	3.6.1.1	CipR	strong	1.1.1.400.539	No	No
SRR4787341	2016	F	> 60	England	Yes	Asia	1.1.1.403.542.598.789	Available	1		SRR4787341			PRJNA315192	3.6.1.1	CipR	strong	1.1.1.403.542	No	No
SRR4787796	2016	F	> 60	England	Yes	Asia	1.1.1.406.549.605.798	Available	1		SRR4787796			PRJNA315192	3.6.1.1	CipR	strong	1.1.1.406.549	No	No
SRR3531905	2016	M	16 - 60	England	Yes	Asia	1.1.1.413.560.618.819	Available	1		SRR3531905			PRJNA315192	3.6.1.1.3	CipR	strong	1.1.1.413.560	No	No
SRR4897449	2016	F	16 - 60	England	Yes	Asia	1.1.1.419.568.626.831	Available	1		SRR4897449			PRJNA315192	3.6.1.1	CipR	strong	1.1.1.419.568	No	No
SRR4787871	2016	F	16 - 60	England	No	N/A	1.1.1.423.574.633.842	Available	1		SRR4787871			PRJNA315192	3.6.1.1	CipR	strong	1.1.1.423.574	No	No
SRR4897267	2016	M	16 - 60	England	Yes	Asia	1.1.1.427.579.639.857	Available	1		SRR4897267			PRJNA315192	3.6.1.1	CipR	strong	1.1.1.427.579	No	No
SRR5005331	2016	F	> 60	England	Unknown	N/A	1.1.1.439.596.660.888	Available	1		SRR5005331			PRJNA315192	3.6.1.1	CipR	strong	1.1.1.439.596	No	No
SRR7285545	2018	F	16 - 60	England	Unknown	N/A	1.1.1.440.1341.1554.2199	Available	1		SRR7285545			PRJNA315192	3.6.1.1	CipR	strong	1.1.1.440.1341	No	No
SRR7895990	2018	F	16 - 60	England	Yes	Europe	1.1.1.440.1584.1859.2820	Available	1		SRR7895990			PRJNA315192	3.6.1.1	CipR	strong	1.1.1.440.1584	No	No
SRR5006384	2016	M	16 - 60	England	Unknown	N/A	1.1.1.440.597.661.890	Available	1		SRR5006384			PRJNA315192	3.6.1.1	CipR	strong	1.1.1.440.597	No	No
SRR5024070	2016	M	16 - 60	England	Yes	Asia	1.1.1.440.597.661.895	Available	1		SRR5024070			PRJNA315192	3.6.1.1	CipR	strong	1.1.1.440.597	No	No
SRR4787272	2016	F	16 - 60	England	Yes	Europe	1.1.1.441.598.662.892	Available	1		SRR4787272			PRJNA315192	3.6.1.1	CipR	strong	1.1.1.441.598	No	No
SRR5024409	2016	F	16 - 60	England	Unknown	N/A	1.1.1.441.598.662.1000	Available	1		SRR5024409			PRJNA315192	3.6.1.1	CipR	strong	1.1.1.441.598	No	No
SRR9007498	2019	F	16 - 60	England	Yes	Asia	1.1.1.444.1734.2078.3256	Available	1		SRR9007498			PRJNA315192	3.6.1.1	CipR	strong	1.1.1.444.1734	No	No
SRR7358307	2016	F	16 - 60	England	Yes	Asia	1.1.1.444.603.667.899	Available	1		SRR7358307			PRJNA315192	3.6.1.1	CipR	strong	1.1.1.444.603	No	No
SRR7249734	2017	M	< 16	England	Unknown	N/A	1.1.1.454.1179.1339.1807	Available	1		SRR7249734			PRJNA315192	3.6.1.1	CipR	strong	1.1.1.454.1179	No	No
SRR8380558	2018	F	16 - 60	England	Yes	Unknown	1.1.1.454.1681.1993.3089	Available	1		SRR8380558			PRJNA315192	3.6.1.1	CipR	strong	1.1.1.454.1681	No	No
SRR4897167	2016	M	16 - 60	England	Yes	Asia	1.1.1.454.627.698.946	Available	1		SRR4897167			PRJNA315192	3.6.1.1	CipR	strong	1.1.1.454.627	No	No
SRR4897321	2016	F	16 - 60	England	No	N/A	1.1.1.455.628.699.948	Available	1		SRR4897321			PRJNA315192	3.6.1.1	CipR	strong	1.1.1.455.628	No	No
SRR7215946	2017	M	16 - 60	England	Yes	Asia	1.1.1.459.1309.1513.2112	Available	1		SRR7215946			PRJNA315192	3.6.1.1	CipR	strong	1.1.1.459.1309	No	No
SRR7236649	2018	M	16 - 60	England	Yes	Asia	1.1.1.459.1366.1588.2274	Available	1		SRR7236649			PRJNA315192	3.6.1.1	CipR	strong	1.1.1.459.1366	No	No
SRR4788227	2016	F	< 16	England	No	N/A	1.1.1.459.632.704.960	Available	1		SRR4788227			PRJNA315192	3.6.1.1	CipR	strong	1.1.1.459.632	No	No
SRR7367361	2016	F	16 - 60	England	Yes	Asia	1.1.1.46.54.702.956	Available	1		SRR7367361			PRJNA315192	3.6.1.1	CipR	strong	1.1.1.46.54	No	No
SRR7250966	2017	M	16 - 60	England	Yes	Asia	1.1.1.463.1213.1385.1894	Available	1		SRR7250966			PRJNA315192	3.6.1.1	CipR	strong	1.1.1.463.1213	No	No
SRR5005538	2016	M	16 - 60	England	Yes	Asia	1.1.1.463.641.719.978	Available	1		SRR5005538			PRJNA315192	3.6.1.1	CipR	strong	1.1.1.463.641	No	No
SRR4787714	2016	F	16 - 60	England	No	N/A	1.1.1.464.642.721.980	Available	1		SRR4787714			PRJNA315192	3.6.1.1	CipR	strong	1.1.1.464.642	No	No
SRR4897702	2016	F	> 60	England	No	N/A	1.1.1.464.642.721.980	Available	1		SRR4897702			PRJNA315192	3.6.1.1	CipR	strong	1.1.1.464.642	No	No
SRR11488035	2020	M	< 16	England	Unknown	N/A	1.1.1.465.1798.2179.3993	Available	1		SRR11488035			PRJNA315192	3.6.1.1	CipR	strong	1.1.1.465.1798	No	No
SRR9944901	2019	F	16 - 60	England	Unknown	N/A	1.1.1.465.1798.2179.3432	Available	1		SRR9944901			PRJNA315192	3.6.1.1	CipR	strong	1.1.1.465.1798	No	No
SRR9973675	2019	F	< 16	England	Unknown	N/A	1.1.1.465.1798.2179.3432	Available	1		SRR9973675			PRJNA315192	3.6.1.1	CipR	strong	1.1.1.465.1798	No	No
SRR4897826	2016	M	16 - 60	England	Unknown	N/A	1.1.1.465.643.722.996	Available	1		SRR4897826			PRJNA315192	3.6.1.1	CipR	strong	1.1.1.465.643	No	No
SRR7286594	2016	F	16 - 60	England	Unknown	N/A	1.1.1.467.648.729.997	Available	1		SRR7286594			PRJNA315192	3.6.1.1	CipR	strong	1.1.1.467.648	No	No
SRR7257086	2016	M	16 - 60	England	Yes	Asia	1.1.1.468.649.730.998	Available	1		SRR7257086			PRJNA315192	3.6.1.1	CipR	strong	1.1.1.468.649	No	No
SRR7230331	2016	F	16 - 60	England	No	N/A	1.1.1.475.672.752.1033	Available	1		SRR7230331			PRJNA315192	3.6.1.1	CipR	strong	1.1.1.475.672	No	No
SRR5006081	2016	F	16 - 60	England	Yes	Asia	1.1.1.477.679.760.1050	Available	1		SRR5006081			PRJNA315192	3.6.1.1	CipR	strong	1.1.1.477.679	No	No
SRR4787342	2016	F	16 - 60	England	Yes	Asia	1.1.1.480.685.766.1060	Available	1		SRR4787342			PRJNA315192	3.6.1.1	CipR	strong	1.1.1.480.685	No	No
SRR4787187	2016	F	< 16	England	Unknown	N/A	1.1.1.484.690.773.1067	Available	1		SRR4787187			PRJNA315192	3.6.1.1	CipR	strong	1.1.1.484.690	No	No
SRR7291919	2016	M	16 - 60	England	Yes	Asia	1.1.1.543.806.900.1223	Available	1		SRR7291919			PRJNA315192	3.6.1.1	CipR	strong	1.1.1.543.806	No	No
SRR7179823	2017	F	16 - 60	England	Unknown	N/A	1.1.1.60.1162.1315.1897	Available	1		SRR7179823			PRJNA315192	3.6.1.1	CipR	strong	1.1.1.60.1162	No	No
SRR7215518	2017	F	< 16	England	Unknown	N/A	1.1.1.60.1162.1315.1764	Available	1		SRR7215518			PRJNA315192	3.6.1.1	CipR	strong	1.1.1.60.1162	No	No
SRR7285562	2017	M	16 - 60	England	Unknown	N/A	1.1.1.60.1162.1315.1838	Available	1		SRR7285562			PRJNA315192	3.6.1.1	CipR	strong	1.1.1.60.1162	No	No
SRR7286445	2017	F	16 - 60	England	Unknown	N/A	1.1.1.60.1162.1315.1838	Available	1		SRR7286445			PRJNA315192	3.6.1.1	CipR	strong	1.1.1.60.1162	No	No
SRR7286611	2017	F	< 16	England	Unknown	N/A	1.1.1.60.1162.1315.1784	Available	1		SRR7286611			PRJNA315192	3.6.1.1	CipR	strong	1.1.1.60.1162	No	No
SRR7367210	2017	F	< 16	England	Unknown	N/A	1.1.1.60.1162.1315.1764	Available	1		SRR7367210			PRJNA315192	3.6.1.1	CipR	strong	1.1.1.60.1162	No	No
SRR10247134	2019	M	> 60	England	Yes	Asia	1.1.1.60.1279.2279.3668	Available	1		SRR10247134			PRJNA315192	3.6.1.1	CipR	strong	1.1.1.60.1279	No	No
SRR10271371	2019	F	> 60	England	Yes	Asia	1.1.1.60.1279.2285.3684	Available	1		SRR10271371			PRJNA315192	3.6.1.1	CipR	strong	1.1.1.60.1279	No	No
SRR7401703	2017	M	> 60	England	Unknown	N/A	1.1.1.60.1279.1469.2037	Available	1		SRR7401703			PRJNA315192	3.6.1.1	CipR	strong	1.1.1.60.1279	No	No
SRR7826954	2018	F	16 - 60	England	Yes	Asia	1.1.1.60.1279.1821.2742	Available	1		SRR7826954			PRJNA315192	3.6.1.1	CipR	strong	1.1.1.60.1279	No	No
SRR8032858	2018	F	> 60	England	Yes	Asia	1.1.1.60.1279.1469.2876	Available	1		SRR8032858			PRJNA315192	3.6.1.1	CipR	strong	1.1.1.60.1279	No	No
SRR8137168	2018	F	> 60	England	Yes	Asia	1.1.1.60.1279.1469.2930	Available	1		SRR8137168			PRJNA315192	3.6.1.1	CipR	strong	1.1.1.60.1279	No	No
SRR7367453	2017	F	16 - 60	England	Unknown	N/A	1.1.1.60.1292.1489.2069	Available	1		SRR7367453			PRJNA315192	3.6.1.1	CipR	strong	1.1.1.60.1292	No	No
SRR8166010	2018	M	> 60	England	Unknown	N/A	1.1.1.60.1625.1922.2946	Available	1		SRR8166010			PRJNA315192	3.6.1.1	CipR	strong	1.1.1.60.1625	No	No
SRR8166035	2018	F	16 - 60	England	Unknown	N/A	1.1.1.60.1625.1922.2949	Available	1		SRR8166035			PRJNA315192	3.6.1.1	CipR	strong	1.1.1.60.1625	No	No
SRR8204011	2018	F	> 60	England	Unknown	N/A	1.1.1.60.1625.1922.2946	Available	1		SRR8204011			PRJNA315192	3.6.1.1	CipR	strong	1.1.1.60.1625	No	No
SRR8385374	2018	F	16 - 60	England	Yes	Asia	1.1.1.60.1625.1922.3090	Available	1		SRR8385374			PRJNA315192	3.6.1.1	CipR	strong	1.1.1.60.1625	No	No
SRR8172602	2018	F	16 - 60	England	No	N/A	1.1.1.60.1630.1928.2957	Available	1		SRR8172602			PRJNA315192	3.6.1.1	CipR	strong	1.1.1.60.1630	No	No
SRR8281085	2018	M	16 - 60	England	Yes	Asia	1.1.1.60.1646.1950.3024	Available	1		SRR8281085			PRJNA315192	3.6.1.1	CipR	strong	1.1.1.60.1646	No	No
SRR9306475	2019	M	< 16	England	Yes	Asia	1.1.1.60.1770.2131.3345	Available	1		SRR9306475			PRJNA315192	3.6.1.1	CipR	strong	1.1.1.60.1770	No	No
SRR10231898	2019	M	16 - 60	England	Yes	Asia	1.1.1.60.1832.2230.3528	Available	1		SRR10231898			PRJNA315192	3.6.1.1	CipR	strong	1.1.1.60.1832	No	No
SRR10397421	2019	F	16 - 60	England	Unknown	N/A	1.1.1.60.1890.2316.3737	Available	1		SRR10397421			PRJNA315192	3.6.1.1	CipR	strong	1.1.1.60.1890	No	No
SRR12103267	2020	F	< 16	England	Unknown	N/A	1.1.1.60.1992.2476.4010	Available	1		SRR12103267			PRJNA315192	3.6.1.1	CipR	strong	1.1.1.60.1992	No	No
SRR12109926	2020	F	< 16	England	No	N/A	1.1.1.60.1992.2476.4011	Available	1		SRR12109926			PRJNA315192	3.6.1.1	CipR	strong	1.1.1.60.1992	No	No
SRR12212053	2020	F	16 - 60	England	Unknown	N/A	1.1.1.60.1992.2476.4011	Available	1		SRR12212053			PRJNA315192	3.6.1.1	CipR	strong	1.1.1.60.1992	No	No
SRR12212054	2020	F	16 - 60	England	Unknown	N/A	1.1.1.60.1992.2476.4011	Available	1		SRR12212054			PRJNA315192	3.6.1.1	CipR	strong	1.1.1.60.1992	No	No
SRR12251265	2020	F	16 - 60	England	Unknown	N/A	1.1.1.60.1992.2476.4011	Available	1		SRR12251265			PRJNA315192	3.6.1.1	CipR	strong	1.1.1.60.1992	No	No
SRR12415948	2020	F	16 - 60	England	Unknown	N/A	1.1.1.60.1992.2476.4018	Available	1		SRR12415948			PRJNA315192	3.6.1.1	CipR	strong	1.1.1.60.1992	No	No
SRR12462984	2020	F	< 16	England	Unknown	N/A	1.1.1.60.1992.2476.4011	Available	1		SRR12462984			PRJNA315192	3.6.1.1	CipR	strong	1.1.1.60.1992	No	No
SRR5023834	2016	M	16 - 60	England	Yes	Asia	1.1.1.60.326.338.844	Available	1		SRR5023834			PRJNA315192	3.6.1.1	CipR	strong	1.1.1.60.326	No	No
SRR4787764	2016	M	< 16	England	Unknown	N/A	1.1.1.60.615.681.921	Available	1		SRR4787764			PRJNA315192	3.6.1.1	CipR	strong	1.1.1.60.615	No	No
SRR4786031	2016	M	16 - 60	England	Yes	Asia	1.1.1.60.70.715.973	Available	1		SRR4786031			PRJNA315192	3.6.1.1	CipR	strong	1.1.1.60.70	No	No
SRR7184251	2016	F	> 60	England	Unknown	N/A	1.1.1.60.703.788.1090	Available	1		SRR7184251			PRJNA315192	3.6.1.1	CipR	strong	1.1.1.60.703	No	No
SRR7251033	2016	F	16 - 60	England	Yes	Asia	1.1.1.651.1054.1167.1521	Available	1		SRR7251033			PRJNA315192	3.6.1.1	CipR	strong	1.1.1.651.1054	No	No
SRR7265938	2017	M	16 - 60	England	Yes	Asia	1.1.1.666.1089.1214.1591	Available	1		SRR7265938			PRJNA315192	3.6.1.1	CipR	strong	1.1.1.666.1089	No	No
SRR7244287	2017	F	16 - 60	England	Unknown	N/A	1.1.1.685.1121.1254.1675	Available	1		SRR7244287			PRJNA315192	3.6.1.1	CipR	strong	1.1.1.685.1121	No	No
SRR7265855	2017	F	16 - 60	England	Yes	Asia	1.1.1.694.1135.1277.1716	Available	1		SRR7265855			PRJNA315192	3.6.1.1	CipR	strong	1.1.1.694.1135	No	No
SRR7251022	2017	M	< 16	England	Yes	Asia	1.1.1.699.1144.1289.1730	Available	1		SRR7251022			PRJNA315192	3.6.1.1	CipR	strong	1.1.1.699.1144	No	No
SRR7223046	2017	M	16 - 60	England	Unknown	N/A	1.1.1.699.1209.1380.1886	Available	1		SRR7223046			PRJNA315192	3.6.1.1	CipR	strong	1.1.1.699.1209	No	No
SRR7266818	2017	M	16 - 60	England	Yes	Asia	1.1.1.705.1155.1304.1751	Available	1		SRR7266818			PRJNA315192	3.6.1.1	CipR	strong	1.1.1.705.1155	No	No
SRR7988722	2018	M	16 - 60	England	Yes	Asia	1.1.1.705.1600.1885.2866	Available	1		SRR7988722			PRJNA315192	3.6.1.1	CipR	strong	1.1.1.705.1600	No	No
SRR8086721	2018	F	16 - 60	England	Unknown	N/A	1.1.1.705.1600.1885.2866	Available	1		SRR8086721			PRJNA315192	3.6.1.1	CipR	strong	1.1.1.705.1600	No	No
SRR8237826	2018	M	16 - 60	England	Unknown	N/A	1.1.1.705.1600.1885.2866	Available	1		SRR8237826			PRJNA315192	3.6.1.1	CipR	strong	1.1.1.705.1600	No	No
SRR8299401	2018	M	16 - 60	England	Unknown	N/A	1.1.1.705.1663.1971.3041	Available	1		SRR8299401			PRJNA315192	3.6.1.1	CipR	strong	1.1.1.705.1663	No	No
SRR8704594	2019	F	16 - 60	England	Yes	Asia	1.1.1.705.1713.2037.3190	Available	1		SRR8704594			PRJNA315192	3.6.1.1	CipR	strong	1.1.1.705.1713	No	No
SRR10313628	2019	M	< 16	England	Unknown	N/A	1.1.1.705.1876.2294.3697	Available	1		SRR10313628			PRJNA315192	3.6.1.1	CipR	strong	1.1.1.705.1876	No	No
SRR10760859	2019	M	> 60	England	Yes	Asia	1.1.1.705.1930.2381.3839	Available	1		SRR10760859			PRJNA315192	3.6.1.1	CipR	strong	1.1.1.705.1930	No	No
SRR11006959	2020	F	16 - 60	England	Yes	Asia	1.1.1.705.1954.2418.3904	Available	1		SRR11006959			PRJNA315192	3.6.1.1	CipR	strong	1.1.1.705.1954	No	No
SRR7230162	2017	M	16 - 60	England	Yes	Asia	1.1.1.710.1165.1319.1770	Available	1		SRR7230162			PRJNA315192	3.6.1.1	CipR	strong	1.1.1.710.1165	No	No
SRR7236590	2017	F	16 - 60	England	No	N/A	1.1.1.713.1171.1328.1790	Available	1		SRR7236590			PRJNA315192	3.6.1.1	CipR	strong	1.1.1.713.1171	No	No
SRR7274837	2017	M	16 - 60	England	Unknown	N/A	1.1.1.713.1171.1328.1799	Available	1		SRR7274837			PRJNA315192	3.6.1.1	CipR	strong	1.1.1.713.1171	No	No
SRR7286477	2017	F	16 - 60	England	No	N/A	1.1.1.713.1171.1328.1799	Available	1		SRR7286477			PRJNA315192	3.6.1.1	CipR	strong	1.1.1.713.1171	No	No
SRR7286503	2017	F	16 - 60	England	No	N/A	1.1.1.713.1171.1328.1799	Available	1		SRR7286503			PRJNA315192	3.6.1.1	CipR	strong	1.1.1.713.1171	No	No
SRR7230354	2017	F	16 - 60	England	Yes	Asia	1.1.1.721.1188.1349.1832	Available	1		SRR7230354			PRJNA315192	3.6.1.1	CipR	strong	1.1.1.721.1188	No	No
SRR7265966	2017	F	16 - 60	England	Yes	Asia	1.1.1.722.1190.1352.1835	Available	1		SRR7265966			PRJNA315192	3.6.1.1.3	CipR	strong	1.1.1.722.1190	No	No
SRR7285570	2017	M	< 16	England	Unknown	N/A	1.1.1.728.1198.1361.1853	Available	1		SRR7285570			PRJNA315192	3.6.1.1	CipR	strong	1.1.1.728.1198	No	No
SRR7187006	2017	F	16 - 60	England	Yes	Asia	1.1.1.732.1203.1368.1866	Available	1		SRR7187006			PRJNA315192	3.6.1.1	CipR	strong	1.1.1.732.1203	No	No
SRR7274848	2017	M	> 60	England	Yes	Asia	1.1.1.732.1203.1368.2183	Available	1		SRR7274848			PRJNA315192	3.6.1.1	CipR	strong	1.1.1.732.1203	No	No
SRR7187007	2017	Unknown	> 60	England	Unknown	N/A	1.1.1.734.1206.1371.1870	Available	1		SRR7187007			PRJNA315192	3.6.1.1	CipR	strong	1.1.1.734.1206	No	No
SRR7367366	2017	M	16 - 60	England	Yes	Asia	1.1.1.735.1208.1374.1873	Available	1		SRR7367366			PRJNA315192	3.6.1.1	CipR	strong	1.1.1.735.1208	No	No
SRR7407919	2017	M	16 - 60	England	Yes	Asia	1.1.1.737.1211.1382.1890	Available	1		SRR7407919			PRJNA315192	3.6.1.1	CipR	strong	1.1.1.737.1211	No	No
SRR7223150	2017	F	16 - 60	England	No	N/A	1.1.1.739.1216.1389.1900	Available	1		SRR7223150			PRJNA315192	3.6.1.1	CipR	strong	1.1.1.739.1216	No	No
SRR7257127	2017	F	16 - 60	England	Yes	Asia	1.1.1.740.1217.1390.1902	Available	1		SRR7257127			PRJNA315192	3.6.1.1	CipR	strong	1.1.1.740.1217	No	No
SRR7244238	2017	M	16 - 60	England	Yes	Asia	1.1.1.744.1223.1396.1916	Available	1		SRR7244238			PRJNA315192	3.6.1.1	CipR	strong	1.1.1.744.1223	No	No
SRR7407979	2017	M	< 16	England	Yes	Asia	1.1.1.757.1247.1428.1968	Available	1		SRR7407979			PRJNA315192	3.6.1.1	CipR	strong	1.1.1.757.1247	No	No
SRR7266796	2017	M	< 16	England	Unknown	N/A	1.1.1.759.1251.1433.1981	Available	1		SRR7266796			PRJNA315192	3.6.1.1	CipR	strong	1.1.1.759.1251	No	No
SRR7187938	2017	F	16 - 60	England	Yes	Asia	1.1.1.762.1257.1442.1994	Available	1		SRR7187938			PRJNA315192	3.6.1.1	CipR	strong	1.1.1.762.1257	No	No
SRR7975979	2018	F	16 - 60	England	Yes	Asia	1.1.1.762.1596.1880.2857	Available	1		SRR7975979			PRJNA315192	3.6.1.1	CipR	strong	1.1.1.762.1596	No	No
SRR7204248	2017	F	< 16	England	Yes	Asia	1.1.1.763.1259.1444.1997	Available	1		SRR7204248			PRJNA315192	3.6.1.1	CipR	strong	1.1.1.763.1259	No	No
SRR7291590	2018	F	16 - 60	England	Unknown	N/A	1.1.1.763.1358.1580.2257	Available	1		SRR7291590			PRJNA315192	3.6.1.1	CipR	strong	1.1.1.763.1358	No	No
SRR7286442	2017	M	16 - 60	England	Unknown	N/A	1.1.1.770.1280.1470.2038	Available	1		SRR7286442			PRJNA315192	3.6.1.1	CipR	strong	1.1.1.770.1280	No	No
SRR7184240	2017	M	> 60	England	Yes	Asia	1.1.1.771.1281.1472.2040	Available	1		SRR7184240			PRJNA315192	3.6.1.1.3	CipR	strong	1.1.1.771.1281	No	No
SRR7286486	2017	F	< 16	England	Yes	Asia	1.1.1.773.1286.1483.2057	Available	1		SRR7286486			PRJNA315192	3.6.1.1	CipR	strong	1.1.1.773.1286	No	No
SRR7276962	2018	F	16 - 60	England	Yes	Asia	1.1.1.773.1373.1598.2300	Available	1		SRR7276962			PRJNA315192	3.6.1.1	CipR	strong	1.1.1.773.1373	No	No
SRR8591910	2019	F	16 - 60	England	Unknown	N/A	1.1.1.773.1707.2031.3174	Available	1		SRR8591910			PRJNA315192	3.6.1.1	CipR	strong	1.1.1.773.1707	No	No
SRR8634607	2019	M	< 16	England	Unknown	N/A	1.1.1.773.1707.2031.3177	Available	1		SRR8634607			PRJNA315192	3.6.1.1	CipR	strong	1.1.1.773.1707	No	No
SRR10231904	2019	M	< 16	England	Yes	Asia	1.1.1.773.1841.2243.3550	Available	1		SRR10231904			PRJNA315192	3.6.1.1	CipR	strong	1.1.1.773.1841	No	No
SRR7285568	2017	F	16 - 60	England	Unknown	N/A	1.1.1.775.1288.1485.2063	Available	1		SRR7285568			PRJNA315192	3.6.1.1	CipR	strong	1.1.1.775.1288	No	No
SRR7286361	2017	F	16 - 60	England	Yes	North America	1.1.1.776.1293.1492.2078	Available	1		SRR7286361			PRJNA315192	3.6.1.1	CipR	strong	1.1.1.776.1293	No	No
SRR7179915	2017	F	> 60	England	Yes	Asia	1.1.1.781.1303.1504.2097	Available	1		SRR7179915			PRJNA315192	3.6.1.1	CipR	strong	1.1.1.781.1303	No	No
SRR7358027	2018	F	> 60	England	Yes	Asia	1.1.1.803.1351.1567.2223	Available	1		SRR7358027			PRJNA315192	3.6.1.1	CipR	strong	1.1.1.803.1351	No	No
SRR7249738	2018	M	16 - 60	England	Yes	Asia	1.1.1.808.1367.1590.2278	Available	1		SRR7249738			PRJNA315192	3.6.1.1	CipR	strong	1.1.1.808.1367	No	No
SRR7265923	2018	F	16 - 60	England	Unknown	N/A	1.1.1.808.1367.1590.2354	Available	1		SRR7265923			PRJNA315192	3.6.1.1	CipR	strong	1.1.1.808.1367	No	No
SRR7266763	2018	F	16 - 60	England	Yes	Asia	1.1.1.809.1370.1594.2286	Available	1		SRR7266763			PRJNA315192	3.6.1.1	CipR	strong	1.1.1.809.1370	No	No
SRR7223119	2018	M	16 - 60	England	Yes	Asia	1.1.1.818.1384.1612.2330	Available	1		SRR7223119			PRJNA315192	3.6.1.1	CipR	strong	1.1.1.818.1384	No	No
SRR7285528	2018	M	> 60	England	Unknown	N/A	1.1.1.822.1396.1625.2362	Available	1		SRR7285528			PRJNA315192	3.6.1.1	CipR	strong	1.1.1.822.1396	No	No
SRR7274809	2018	F	16 - 60	England	Yes	Asia	1.1.1.823.1398.1627.2369	Available	1		SRR7274809			PRJNA315192	3.6.1.1	CipR	strong	1.1.1.823.1398	No	No
SRR7291912	2018	F	< 16	England	Yes	Asia	1.1.1.829.1409.1641.2397	Available	1		SRR7291912			PRJNA315192	3.6.1.1	CipR	strong	1.1.1.829.1409	No	No
SRR10326061	2019	M	16 - 60	England	Yes	Unknown	1.1.1.829.1801.2184.3708	Available	1		SRR10326061			PRJNA315192	3.6.1.1	CipR	strong	1.1.1.829.1801	No	No
SRR9947474	2019	F	16 - 60	England	Unknown	N/A	1.1.1.829.1801.2184.3437	Available	1		SRR9947474			PRJNA315192	3.6.1.1	CipR	strong	1.1.1.829.1801	No	No
SRR7358112	2018	F	16 - 60	England	Yes	Asia	1.1.1.830.1410.1642.2398	Available	1		SRR7358112			PRJNA315192	3.6.1.1	CipR	strong	1.1.1.830.1410	No	No
SRR7456556	2018	F	16 - 60	England	Yes	Asia	1.1.1.835.1421.1655.2422	Available	1		SRR7456556			PRJNA315192	3.6.1.1	CipR	strong	1.1.1.835.1421	No	No
SRR7456572	2018	M	16 - 60	England	Unknown	N/A	1.1.1.837.1423.1657.2424	Available	1		SRR7456572			PRJNA315192	3.6.1.1	CipR	strong	1.1.1.837.1423	No	No
SRR7527645	2018	F	16 - 60	England	Yes	Asia	1.1.1.845.1436.1674.2457	Available	1		SRR7527645			PRJNA315192	3.6.1.1	CipR	strong	1.1.1.845.1436	No	No
SRR8059110	2018	M	> 60	England	Yes	Asia	1.1.1.845.1611.1896.2884	Available	1		SRR8059110			PRJNA315192	3.6.1.1	CipR	strong	1.1.1.845.1611	No	No
SRR8086653	2018	M	16 - 60	England	Yes	Asia	1.1.1.845.1611.1896.2895	Available	1		SRR8086653			PRJNA315192	3.6.1.1	CipR	strong	1.1.1.845.1611	No	No
SRR7588674	2018	F	16 - 60	England	Yes	Asia	1.1.1.846.1438.1676.2460	Available	1		SRR7588674			PRJNA315192	3.6.1.1	CipR	strong	1.1.1.846.1438	No	No
SRR7832323	2018	M	16 - 60	England	Unknown	N/A	1.1.1.905.1543.1804.2684	Available	1		SRR7832323			PRJNA315192	3.6.1.1	CipR	strong	1.1.1.905.1543	No	No
SRR8942805	2019	F	16 - 60	England	Yes	Asia	1.1.1.905.1730.2069.3242	Available	1		SRR8942805			PRJNA315192	3.6.1.1	CipR	strong	1.1.1.905.1730	No	No
SRR7827041	2018	F	16 - 60	England	No	N/A	1.1.1.909.1552.1815.2730	Available	1		SRR7827041			PRJNA315192	3.6.1.1	CipR	strong	1.1.1.909.1552	No	No
SRR7834591	2018	M	> 60	England	Unknown	N/A	1.1.1.913.1560.1828.2755	Available	1		SRR7834591			PRJNA315192	3.6.1.1	CipR	strong	1.1.1.913.1560	No	No
SRR8052186	2018	F	16 - 60	England	Yes	Asia	1.1.1.913.1609.1894.2880	Available	1		SRR8052186			PRJNA315192	3.6.1.1	CipR	strong	1.1.1.913.1609	No	No
SRR10519449	2019	M	16 - 60	England	Yes	Asia	1.1.1.913.1735.2339.3769	Available	1		SRR10519449			PRJNA315192	3.6.1.1	CipR	strong	1.1.1.913.1735	No	No
SRR8981811	2019	F	16 - 60	England	Yes	Asia	1.1.1.913.1735.2081.3260	Available	1		SRR8981811			PRJNA315192	3.6.1.1	CipR	strong	1.1.1.913.1735	No	No
SRR9595007	2019	M	16 - 60	England	Unknown	N/A	1.1.1.913.1781.2149.3373	Available	1		SRR9595007			PRJNA315192	3.6.1.1	CipR	strong	1.1.1.913.1781	No	No
SRR10228563	2019	F	16 - 60	England	No	N/A	1.1.1.913.1870.2288.3689	Available	1		SRR10228563			PRJNA315192	3.6.1.1	CipR	strong	1.1.1.913.1870	No	No
SRR7842169	2018	F	16 - 60	England	Yes	Asia	1.1.1.915.1565.1834.2768	Available	1		SRR7842169			PRJNA315192	3.6.1.1	CipR	strong	1.1.1.915.1565	No	No
SRR7836297	2018	F	> 60	England	No	N/A	1.1.1.917.1567.1836.2771	Available	1		SRR7836297			PRJNA315192	3.6.1.1	CipR	strong	1.1.1.917.1567	No	No
SRR7850103	2018	M	16 - 60	England	Yes	Asia	1.1.1.920.1571.1842.2784	Available	1		SRR7850103			PRJNA315192	3.6.1.1	CipR	strong	1.1.1.920.1571	No	No
SRR8032435	2018	M	16 - 60	England	Yes	Asia	1.1.1.932.1602.1887.2869	Available	1		SRR8032435			PRJNA315192	3.6.1.1	CipR	strong	1.1.1.932.1602	No	No
SRR8524550	2019	Unknown	< 16	England	Unknown	N/A	1.1.1.932.1695.2015.3140	Available	1		SRR8524550			PRJNA315192	3.6.1.1	CipR	strong	1.1.1.932.1695	No	No
SRR10005842	2019	F	16 - 60	England	Unknown	N/A	1.1.1.932.1809.2198.3462	Available	1		SRR10005842			PRJNA315192	3.6.1.1	CipR	strong	1.1.1.932.1809	No	No
SRR8086697	2018	F	16 - 60	England	Yes	Asia	1.1.1.936.1612.1899.2894	Available	1		SRR8086697			PRJNA315192	3.6.1.1	CipR	strong	1.1.1.936.1612	No	No
SRR8149116	2018	M	< 16	England	No	N/A	1.1.1.939.1624.1920.2941	Available	1		SRR8149116			PRJNA315192	3.6.1.1	CipR	strong	1.1.1.939.1624	No	No
SRR10314892	2019	F	16 - 60	England	Unknown	N/A	1.1.1.939.1878.2296.3700	Available	1		SRR10314892			PRJNA315192	3.6.1.1	CipR	strong	1.1.1.939.1878	No	No
SRR8307264	2018	M	> 60	England	Yes	Asia	1.1.1.953.1668.1976.3048	Available	1		SRR8307264			PRJNA315192	3.6.1.1	CipR	strong	1.1.1.953.1668	No	No
SRR8380048	2018	F	16 - 60	England	Unknown	N/A	1.1.1.959.1679.1988.3078	Available	1		SRR8380048			PRJNA315192	3.6.1.1	CipR	strong	1.1.1.959.1679	No	No
SRR12742984	2020	F	16 - 60	England	Yes	Unknown	1.1.1.959.1996.2485.4031	Available	1		SRR12742984			PRJNA315192	3.6.1.1	CipR	strong	1.1.1.959.1996	No	No
SRR8467678	2019	F	16 - 60	England	Unknown	N/A	1.1.1.964.1690.2005.3121	Available	1		SRR8467678			PRJNA315192	3.6.1.1	CipR	strong	1.1.1.964.1690	No	No
SRR8634614	2019	F	16 - 60	England	Yes	Asia	1.1.1.969.1708.2032.3178	Available	1		SRR8634614			PRJNA315192	3.6.1.1	CipR	strong	1.1.1.969.1708	No	No
SRR8715612	2019	M	> 60	England	Unknown	N/A	1.1.1.971.1714.2039.3192	Available	1		SRR8715612			PRJNA315192	3.6.1.1	CipR	strong	1.1.1.971.1714	No	No
SRR8746515	2019	F	16 - 60	England	Yes	Asia	1.1.1.974.1717.2045.3202	Available	1		SRR8746515			PRJNA315192	3.6.1.1	CipR	strong	1.1.1.974.1717	No	No
SRR8774307	2019	M	16 - 60	England	Unknown	N/A	1.1.1.975.1718.2047.3208	Available	1		SRR8774307			PRJNA315192	3.6.1.1	CipR	strong	1.1.1.975.1718	No	No
SRR8775486	2019	F	16 - 60	England	Unknown	N/A	1.1.1.975.1718.2047.3208	Available	1		SRR8775486			PRJNA315192	3.6.1.1	CipR	strong	1.1.1.975.1718	No	No
SRR8832727	2019	F	16 - 60	England	Yes	Asia	1.1.1.975.1718.2047.3208	Available	1		SRR8832727			PRJNA315192	3.6.1.1	CipR	strong	1.1.1.975.1718	No	No
SRR9178561	2019	M	< 16	England	Unknown	N/A	1.1.1.975.1760.2116.3316	Available	1		SRR9178561			PRJNA315192	3.6.1.1	CipR	strong	1.1.1.975.1760	No	No
SRR8820064	2019	M	16 - 60	England	Yes	Asia	1.1.1.978.1722.2051.3213	Available	1		SRR8820064			PRJNA315192	3.6.1.1	CipR	strong	1.1.1.978.1722	No	No
SRR10019371	2019	F	16 - 60	England	Yes	Asia	1.1.1.982.1731.2070.3468	Available	1		SRR10019371			PRJNA315192	3.6.1.1	CipR	strong	1.1.1.982.1731	No	No
SRR8936119	2019	F	< 16	England	Unknown	N/A	1.1.1.982.1731.2070.3245	Available	1		SRR8936119			PRJNA315192	3.6.1.1	CipR	strong	1.1.1.982.1731	No	No
SRR8979718	2019	M	16 - 60	England	Yes	Asia	1.1.1.983.1732.2075.3251	Available	1		SRR8979718			PRJNA315192	3.6.1.1	CipR	strong	1.1.1.983.1732	No	No
SRR9050419	2019	F	16 - 60	England	Yes	Asia	1.1.1.988.1744.2094.3280	Available	1		SRR9050419			PRJNA315192	3.6.1.1	CipR	strong	1.1.1.988.1744	No	No
SRR10302327	2019	F	> 60	England	Unknown	N/A	1.1.1.988.1871.2289.3691	Available	1		SRR10302327			PRJNA315192	3.6.1.1	CipR	strong	1.1.1.988.1871	No	No
SRR9121378	2019	F	> 60	England	Yes	Asia	1.1.1.994.1755.2107.3303	Available	1		SRR9121378			PRJNA315192	3.6.1.1	CipR	strong	1.1.1.994.1755	No	No
SRR4787230	2016	F	< 16	England	No	N/A	1.1.183.412.559.617.818	Available	1		SRR4787230			PRJNA315192	3.6.1.1	CipR	strong	1.1.183.412.559	No	No
SRR7850116	2018	M	> 60	England	Yes	Asia	1.1.433.908.1550.1813.2718	Available	1		SRR7850116			PRJNA315192	3.6.1.1	CipR	strong	1.1.433.908.1550	No	No
SRR10247320	2019	M	> 60	England	Unknown	N/A	1.1.469.1024.1852.2260.3578	Available	1		SRR10247320			PRJNA315192	3.6.1.1	CipR	strong	1.1.469.1024.1852	No	No
SRR7885873	Ref	Ref	Ref	Ref	Ref	Ref	Ref	Available	1		SRR7885873				2.7.4	Unknown	strong	Ref....		No
SRR7885939	Ref	Ref	Ref	Ref	Ref	Ref	Ref	Available	1		SRR7885939				3.6.1.1.3	CipR	strong	Ref....		No
SRR10874263	2020	F	16 - 60	England	Yes	South America	1.1.1.1056.1937.2397.3872	Available	1		SRR10874263			PRJNA315192	3.6.1	CipR_parent	strong	1.1.1.1056.1937	No	No
SRR7204346	2017	F	16 - 60	England	Unknown	N/A	1.1.1.38.1057.1336.1804	Available	1		SRR7204346			PRJNA315192	3.6.1	CipR_parent	strong	1.1.1.38.1057	No	No
SRR7265940	2017	F	16 - 60	England	Yes	Africa	1.1.1.38.1057.1336.1855	Available	1		SRR7265940			PRJNA315192	3.6.1	CipR_parent	strong	1.1.1.38.1057	No	No
SRR8114767	2018	F	16 - 60	England	Yes	Unknown	1.1.1.38.1057.1907.2917	Available	1		SRR8114767			PRJNA315192	3.6.1	CipR_parent	strong	1.1.1.38.1057	No	No
SRR9311801	2019	F	16 - 60	England	Unknown	N/A	1.1.1.38.1057.2136.3353	Available	1		SRR9311801			PRJNA315192	3.6.1	CipR_parent	strong	1.1.1.38.1057	No	No
SRR9661210	2019	F	16 - 60	England	Yes	Asia	1.1.1.38.1057.2155.3387	Available	1		SRR9661210			PRJNA315192	3.6.1	CipR_parent	strong	1.1.1.38.1057	No	No
SRR9961606	2019	F	16 - 60	England	Yes	Asia	1.1.1.38.1057.1907.3446	Available	1		SRR9961606			PRJNA315192	3.6.1	CipR_parent	strong	1.1.1.38.1057	No	No
SRR9973698	2019	M	16 - 60	England	Unknown	N/A	1.1.1.38.1057.2136.3452	Available	1		SRR9973698			PRJNA315192	3.6.1	CipR_parent	strong	1.1.1.38.1057	No	No
SRR9988857	2019	F	16 - 60	England	Unknown	N/A	1.1.1.38.1057.2194.3455	Available	1		SRR9988857			PRJNA315192	3.6.1	CipR_parent	strong	1.1.1.38.1057	No	No
SRR7266387	2017	M	16 - 60	England	Unknown	N/A	1.1.1.38.1095.1221.1605	Available	1		SRR7266387			PRJNA315192	3.6.1	CipR_parent	strong	1.1.1.38.1095	No	No
SRR7236439	2017	M	16 - 60	England	Unknown	N/A	1.1.1.38.1241.1422.1959	Available	1		SRR7236439			PRJNA315192	3.6.1	CipR_parent	strong	1.1.1.38.1241	No	No
SRR7277755	2017	M	16 - 60	England	Unknown	N/A	1.1.1.38.1241.1422.1959	Available	1		SRR7277755			PRJNA315192	3.6.1	CipR_parent	strong	1.1.1.38.1241	No	No
SRR7283762	2017	F	16 - 60	England	Yes	North America	1.1.1.38.1253.1435.1983	Available	1		SRR7283762			PRJNA315192	3.6.1	CipR_parent	strong	1.1.1.38.1253	No	No
SRR7251490	2017	F	16 - 60	England	Yes	Asia	1.1.1.38.1262.1450.2004	Available	1		SRR7251490			PRJNA315192	3.6.1	CipR_parent	strong	1.1.1.38.1262	No	No
SRR7265926	2017	F	16 - 60	England	Unknown	N/A	1.1.1.38.1289.1486.2064	Available	1		SRR7265926			PRJNA315192	3.6.1	CipR_parent	strong	1.1.1.38.1289	No	No
SRR7187063	2017	F	16 - 60	England	No	N/A	1.1.1.38.1301.1501.2092	Available	1		SRR7187063			PRJNA315192	3.6.1	CipR_parent	strong	1.1.1.38.1301	No	No
SRR7172059	2017	F	16 - 60	England	Unknown	N/A	1.1.1.38.1313.1517.2121	Available	1		SRR7172059			PRJNA315192	3.6.1	CipR_parent	strong	1.1.1.38.1313	No	No
SRR9260546	2019	F	16 - 60	England	Yes	South America	1.1.1.38.1313.2090.3275	Available	1		SRR9260546			PRJNA315192	3.6.1	CipR_parent	strong	1.1.1.38.1313	No	No
SRR7256974	2017	F	16 - 60	England	Yes	Unknown	1.1.1.38.1335.1546.2182	Available	1		SRR7256974			PRJNA315192	3.6.1	CipR_parent	strong	1.1.1.38.1335	No	No
SRR7179963	2018	M	16 - 60	England	Unknown	N/A	1.1.1.38.1347.1560.2214	Available	1		SRR7179963			PRJNA315192	3.6.1	CipR_parent	strong	1.1.1.38.1347	No	No
SRR10843789	2019	M	> 60	England	Yes	North America	1.1.1.38.1411.2391.3858	Available	1		SRR10843789			PRJNA315192	3.6.1	CipR_parent	strong	1.1.1.38.1411	No	No
SRR7367239	2018	M	16 - 60	England	No	N/A	1.1.1.38.1411.1644.2402	Available	1		SRR7367239			PRJNA315192	3.6.1	CipR_parent	strong	1.1.1.38.1411	No	No
SRR7850077	2018	F	16 - 60	England	Unknown	N/A	1.1.1.38.1411.1817.2736	Available	1		SRR7850077			PRJNA315192	3.6.1	CipR_parent	strong	1.1.1.38.1411	No	No
SRR7850063	2018	M	< 16	England	Yes	North America	1.1.1.38.1575.1846.2791	Available	1		SRR7850063			PRJNA315192	3.6.1	CipR_parent	strong	1.1.1.38.1575	No	No
SRR8194842	2018	F	16 - 60	England	Unknown	N/A	1.1.1.38.1639.1938.2982	Available	1		SRR8194842			PRJNA315192	3.6.1	CipR_parent	strong	1.1.1.38.1639	No	No
SRR8523761	2019	F	16 - 60	England	Yes	Unknown	1.1.1.38.1694.2013.3133	Available	1		SRR8523761			PRJNA315192	3.6.1	CipR_parent	strong	1.1.1.38.1694	No	No
SRR8591904	2019	F	16 - 60	England	Unknown	N/A	1.1.1.38.1705.2027.3168	Available	1		SRR8591904			PRJNA315192	3.6.1	CipR_parent	strong	1.1.1.38.1705	No	No
SRR9259132	2019	F	16 - 60	England	Unknown	N/A	1.1.1.38.1769.2130.3341	Available	1		SRR9259132			PRJNA315192	3.6.1	CipR_parent	strong	1.1.1.38.1769	No	No
SRR9720383	2019	F	16 - 60	England	Unknown	N/A	1.1.1.38.1786.2161.3398	Available	1		SRR9720383			PRJNA315192	3.6.1	CipR_parent	strong	1.1.1.38.1786	No	No
SRR10905048	2020	M	> 60	England	Yes	South America	1.1.1.38.1939.2402.3877	Available	1		SRR10905048			PRJNA315192	3.6.1	CipR_parent	strong	1.1.1.38.1939	No	No
SRR11215163	2020	M	16 - 60	England	Yes	North America	1.1.1.38.1972.2448.3954	Available	1		SRR11215163			PRJNA315192	3.6.1	CipR_parent	strong	1.1.1.38.1972	No	No
SRR11361821	2020	F	16 - 60	England	Unknown	N/A	1.1.1.38.1982.2459.3971	Available	1		SRR11361821			PRJNA315192	3.6.1	CipR_parent	strong	1.1.1.38.1982	No	No
SRR11488038	2020	F	16 - 60	England	Yes	North America	1.1.1.38.1982.2466.3989	Available	1		SRR11488038			PRJNA315192	3.6.1	CipR_parent	strong	1.1.1.38.1982	No	No
SRR13004325	2020	M	16 - 60	England	Unknown	N/A	1.1.1.38.1999.2488.4041	Available	1		SRR13004325			PRJNA315192	3.6.1	CipR_parent	strong	1.1.1.38.1999	No	No
SRR3530409	2016	M	16 - 60	England	No	N/A	1.1.1.38.306.317.638	Available	1		SRR3530409			PRJNA315192	3.6.1	CipR_parent	strong	1.1.1.38.306	No	No
SRR10319758	2019	F	16 - 60	England	Yes	Asia	1.1.1.38.322.2299.3705	Available	1		SRR10319758			PRJNA315192	3.6.1	CipR_parent	strong	1.1.1.38.322	No	No
SRR10319759	2019	M	16 - 60	England	Yes	Europe	1.1.1.38.322.2299.3706	Available	1		SRR10319759			PRJNA315192	3.6.1	CipR_parent	strong	1.1.1.38.322	No	No
SRR10559548	2019	M	16 - 60	England	Unknown	N/A	1.1.1.38.322.2299.3794	Available	1		SRR10559548			PRJNA315192	3.6.1	CipR_parent	strong	1.1.1.38.322	No	No
SRR7191541	2017	F	16 - 60	England	Unknown	N/A	1.1.1.38.322.1365.1858	Available	1		SRR7191541			PRJNA315192	3.6.1	CipR_parent	strong	1.1.1.38.322	No	No
SRR7890015	2018	M	16 - 60	England	Yes	Asia	1.1.1.38.322.352.2805	Available	1		SRR7890015			PRJNA315192	3.6.1	CipR_parent	strong	1.1.1.38.322	No	No
SRR8086736	2018	M	> 60	England	Unknown	N/A	1.1.1.38.322.352.2887	Available	1		SRR8086736			PRJNA315192	3.6.1	CipR_parent	strong	1.1.1.38.322	No	No
SRR10985497	2020	F	16 - 60	England	Yes	South America	1.1.1.38.336.2413.3898	Available	1		SRR10985497			PRJNA315192	3.6.1	CipR_parent	strong	1.1.1.38.336	No	No
SRR11041497	2020	M	16 - 60	England	Yes	Africa	1.1.1.38.336.2421.3909	Available	1		SRR11041497			PRJNA315192	3.6.1	CipR_parent	strong	1.1.1.38.336	No	No
SRR11080621	2020	F	16 - 60	England	Unknown	N/A	1.1.1.38.336.2429.3926	Available	1		SRR11080621			PRJNA315192	3.6.1	CipR_parent	strong	1.1.1.38.336	No	No
SRR11206403	2020	M	16 - 60	England	Unknown	N/A	1.1.1.38.336.2443.3946	Available	1		SRR11206403			PRJNA315192	3.6.1	CipR_parent	strong	1.1.1.38.336	No	No
SRR11215191	2020	F	16 - 60	England	No	N/A	1.1.1.38.336.2443.3946	Available	1		SRR11215191			PRJNA315192	3.6.1	CipR_parent	strong	1.1.1.38.336	No	No
SRR7172260	2017	F	> 60	England	Yes	North America	1.1.1.38.336.1233.1638	Available	1		SRR7172260			PRJNA315192	3.6.1	CipR_parent	strong	1.1.1.38.336	No	No
SRR7186944	2017	M	16 - 60	England	Yes	Europe	1.1.1.38.336.1268.1743	Available	1		SRR7186944			PRJNA315192	3.6.1	CipR_parent	strong	1.1.1.38.336	No	No
SRR7187065	2017	M	16 - 60	England	Yes	South America	1.1.1.38.336.1360.2166	Available	1		SRR7187065			PRJNA315192	3.6.1	CipR_parent	strong	1.1.1.38.336	No	No
SRR7223120	2017	M	> 60	England	No	N/A	1.1.1.38.336.1268.1700	Available	1		SRR7223120			PRJNA315192	3.6.1	CipR_parent	strong	1.1.1.38.336	No	No
SRR7277692	2017	F	16 - 60	England	Unknown	N/A	1.1.1.38.336.1268.1707	Available	1		SRR7277692			PRJNA315192	3.6.1	CipR_parent	strong	1.1.1.38.336	No	No
SRR7282621	2017	F	16 - 60	England	Unknown	N/A	1.1.1.38.336.1475.2046	Available	1		SRR7282621			PRJNA315192	3.6.1	CipR_parent	strong	1.1.1.38.336	No	No
SRR7286182	2018	M	> 60	England	Yes	South America	1.1.1.38.336.1360.2299	Available	1		SRR7286182			PRJNA315192	3.6.1	CipR_parent	strong	1.1.1.38.336	No	No
SRR7286608	2018	F	16 - 60	England	Yes	South America	1.1.1.38.336.1360.2376	Available	1		SRR7286608			PRJNA315192	3.6.1	CipR_parent	strong	1.1.1.38.336	No	No
SRR7358009	2018	M	16 - 60	England	Unknown	N/A	1.1.1.38.336.1360.2344	Available	1		SRR7358009			PRJNA315192	3.6.1	CipR_parent	strong	1.1.1.38.336	No	No
SRR7358108	2017	F	16 - 60	England	Unknown	N/A	1.1.1.38.336.1360.1852	Available	1		SRR7358108			PRJNA315192	3.6.1	CipR_parent	strong	1.1.1.38.336	No	No
SRR7358114	2018	M	16 - 60	England	Unknown	N/A	1.1.1.38.336.1360.2344	Available	1		SRR7358114			PRJNA315192	3.6.1	CipR_parent	strong	1.1.1.38.336	No	No
SRR7367578	2017	F	16 - 60	England	Unknown	N/A	1.1.1.38.336.1360.1859	Available	1		SRR7367578			PRJNA315192	3.6.1	CipR_parent	strong	1.1.1.38.336	No	No
SRR7407917	2018	M	16 - 60	England	Yes	South America	1.1.1.38.336.1360.2376	Available	1		SRR7407917			PRJNA315192	3.6.1	CipR_parent	strong	1.1.1.38.336	No	No
SRR7407918	2018	F	16 - 60	England	Unknown	N/A	1.1.1.38.336.1360.2377	Available	1		SRR7407918			PRJNA315192	3.6.1	CipR_parent	strong	1.1.1.38.336	No	No
SRR7588702	2018	M	16 - 60	England	No	N/A	1.1.1.38.336.1360.2475	Available	1		SRR7588702			PRJNA315192	3.6.1	CipR_parent	strong	1.1.1.38.336	No	No
SRR7588741	2018	M	16 - 60	England	Yes	Unknown	1.1.1.38.336.1360.2603	Available	1		SRR7588741			PRJNA315192	3.6.1	CipR_parent	strong	1.1.1.38.336	No	No
SRR7839337	2018	F	16 - 60	England	Yes	South America	1.1.1.38.336.1360.2753	Available	1		SRR7839337			PRJNA315192	3.6.1	CipR_parent	strong	1.1.1.38.336	No	No
SRR7850150	2018	M	16 - 60	England	Unknown	N/A	1.1.1.38.336.1360.2376	Available	1		SRR7850150			PRJNA315192	3.6.1	CipR_parent	strong	1.1.1.38.336	No	No
SRR7850174	2018	M	16 - 60	England	Unknown	N/A	1.1.1.38.336.1360.2702	Available	1		SRR7850174			PRJNA315192	3.6.1	CipR_parent	strong	1.1.1.38.336	No	No
SRR8114785	2018	F	> 60	England	Unknown	N/A	1.1.1.38.336.1360.2909	Available	1		SRR8114785			PRJNA315192	3.6.1	CipR_parent	strong	1.1.1.38.336	No	No
SRR8737845	2019	F	16 - 60	England	Unknown	N/A	1.1.1.38.336.1360.3198	Available	1		SRR8737845			PRJNA315192	3.6.1	CipR_parent	strong	1.1.1.38.336	No	No
SRR9259314	2019	M	16 - 60	England	Unknown	N/A	1.1.1.38.336.2112.3310	Available	1		SRR9259314			PRJNA315192	3.6.1	CipR_parent	strong	1.1.1.38.336	No	No
SRR3530338	2016	F	> 60	England	Yes	North America	1.1.1.38.533.585.772	Available	1		SRR3530338			PRJNA315192	3.6.1	CipR_parent	strong	1.1.1.38.533	No	No
SRR5005435	2016	F	16 - 60	England	Yes	North America	1.1.1.38.533.585.915	Available	1		SRR5005435			PRJNA315192	3.6.1	CipR_parent	strong	1.1.1.38.533	No	No
SRR3531877	2016	F	16 - 60	England	Yes	North America	1.1.1.38.545.601.792	Available	1		SRR3531877			PRJNA315192	3.6.1	CipR_parent	strong	1.1.1.38.545	No	No
SRR4787758	2016	M	16 - 60	England	No	N/A	1.1.1.38.565.623.827	Available	1		SRR4787758			PRJNA315192	3.6.1	CipR_parent	strong	1.1.1.38.565	No	No
SRR4788369	2016	M	< 16	England	Yes	North America	1.1.1.38.601.665.912	Available	1		SRR4788369			PRJNA315192	3.6.1	CipR_parent	strong	1.1.1.38.601	No	No
SRR4788374	2016	F	16 - 60	England	Yes	North America	1.1.1.38.601.665.896	Available	1		SRR4788374			PRJNA315192	3.6.1	CipR_parent	strong	1.1.1.38.601	No	No
SRR4787328	2016	F	< 16	England	Unknown	N/A	1.1.1.38.693.776.1070	Available	1		SRR4787328			PRJNA315192	3.6.1	CipR_parent	strong	1.1.1.38.693	No	No
SRR7221231	2017	M	16 - 60	England	Yes	Asia	1.1.1.38.693.776.1840	Available	1		SRR7221231			PRJNA315192	3.6.1	CipR_parent	strong	1.1.1.38.693	No	No
SRR7223097	2017	F	16 - 60	England	Yes	Asia	1.1.1.38.693.776.2050	Available	1		SRR7223097			PRJNA315192	3.6.1	CipR_parent	strong	1.1.1.38.693	No	No
SRR7250989	2017	M	16 - 60	England	Unknown	N/A	1.1.1.38.693.776.1953	Available	1		SRR7250989			PRJNA315192	3.6.1	CipR_parent	strong	1.1.1.38.693	No	No
SRR7842129	2018	F	16 - 60	England	Yes	North America	1.1.1.901.1537.1797.2667	Available	1		SRR7842129			PRJNA315192	3.6.1	CipR_parent	strong	1.1.1.901.1537	No	No
SRR7850052	2018	F	16 - 60	England	Yes	Unknown	1.1.1.901.1537.1797.2667	Available	1		SRR7850052			PRJNA315192	3.6.1	CipR_parent	strong	1.1.1.901.1537	No	No
SRR8237812	2018	F	16 - 60	England	Yes	North America	1.1.1.943.1642.1945.2992	Available	1		SRR8237812			PRJNA315192	3.6.1	CipR_parent	strong	1.1.1.943.1642	No	No
SRR8237819	2018	F	16 - 60	England	Yes	North America	1.1.1.943.1642.1945.2995	Available	1		SRR8237819			PRJNA315192	3.6.1	CipR_parent	strong	1.1.1.943.1642	No	No
SRR8237820	2018	M	16 - 60	England	Yes	North America	1.1.1.943.1642.1945.2992	Available	1		SRR8237820			PRJNA315192	3.6.1	CipR_parent	strong	1.1.1.943.1642	No	No
SRR7866104	2018	F	16 - 60	England	Yes	North America	1.1.10.15.1562.1830.2759	Available	1		SRR7866104			PRJNA315192	3.6.1	CipR_parent	strong	1.1.10.15.1562	No	No
SRR8166026	2018	F	> 60	England	Yes	Europe	1.1.10.15.1562.1839.2956	Available	1		SRR8166026			PRJNA315192	3.6.1	CipR_parent	strong	1.1.10.15.1562	No	No
SRR7221259	2016	M	16 - 60	England	Yes	North America	1.1.10.15.682.763.1057	Available	1		SRR7221259			PRJNA315192	3.6.1	CipR_parent	strong	1.1.10.15.682	No	No
SRR9874601	2019	M	16 - 60	England	Yes	Africa	1.1.126.1011.1792.2171.3417	Available	1		SRR9874601			PRJNA315192	3.6.1	CipR_parent	strong	1.1.126.1011.1792	No	No
SRR10397441	2019	M	16 - 60	England	Unknown	N/A	1.1.126.1035.1887.2310.3729	Available	1		SRR10397441			PRJNA315192	3.6.1	CipR_parent	strong	1.1.126.1035.1887	No	No
SRR10519457	2019	M	16 - 60	England	Unknown	N/A	1.1.126.1039.1903.2342.3776	Available	1		SRR10519457			PRJNA315192	3.6.1	CipR_parent	strong	1.1.126.1039.1903	No	No
SRR7204380	2018	M	16 - 60	England	Unknown	N/A	1.1.126.791.1327.1536.2162	Available	1		SRR7204380			PRJNA315192	3.6.1	CipR_parent	strong	1.1.126.791.1327	No	No
SRR7285526	2017	F	16 - 60	England	Unknown	N/A	1.1.126.791.1327.1536.2162	Available	1		SRR7285526			PRJNA315192	3.6.1	CipR_parent	strong	1.1.126.791.1327	No	No
SRR8704573	2019	F	16 - 60	England	Unknown	N/A	1.1.126.791.1327.2038.3191	Available	1		SRR8704573			PRJNA315192	3.6.1	CipR_parent	strong	1.1.126.791.1327	No	No
SRR9719293	2019	M	16 - 60	England	Unknown	N/A	1.1.126.791.1785.2159.3395	Available	1		SRR9719293			PRJNA315192	3.6.1	CipR_parent	strong	1.1.126.791.1785	No	No
SRR7244243	2018	F	16 - 60	England	Unknown	N/A	1.1.126.811.1372.1596.2293	Available	1		SRR7244243			PRJNA315192	3.6.1	CipR_parent	strong	1.1.126.811.1372	No	No
SRR9260182	2019	F	16 - 60	England	Yes	Africa	1.1.126.811.1425.1659.3265	Available	1		SRR9260182			PRJNA315192	3.6.1	CipR_parent	strong	1.1.126.811.1425	No	No
SRR7834588	2018	M	< 16	England	Unknown	N/A	1.1.126.907.1547.1810.2706	Available	1		SRR7834588			PRJNA315192	3.6.1	CipR_parent	strong	1.1.126.907.1547	No	No
SRR8052185	2018	M	< 16	England	Unknown	N/A	1.1.126.907.1607.1892.2877	Available	1		SRR8052185			PRJNA315192	3.6.1	CipR_parent	strong	1.1.126.907.1607	No	No
SRR8097437	2018	F	< 16	England	Unknown	N/A	1.1.126.935.1608.1893.2879	Available	1		SRR8097437			PRJNA315192	3.6.1	CipR_parent	strong	1.1.126.935.1608	No	No
SRR8299405	2018	F	16 - 60	England	Unknown	N/A	1.1.126.935.1662.1970.3039	Available	1		SRR8299405			PRJNA315192	3.6.1	CipR_parent	strong	1.1.126.935.1662	No	No
SRR9007505	2019	M	16 - 60	England	Unknown	N/A	1.1.126.985.1736.2082.3262	Available	1		SRR9007505			PRJNA315192	3.6.1	CipR_parent	strong	1.1.126.985.1736	No	No
SRR7284306	2017	M	16 - 60	England	No	N/A	1.1.163.336.1322.1529.2140	Available	1		SRR7284306			PRJNA315192	3.6.1	CipR_parent	strong	1.1.163.336.1322	No	No
SRR7850101	2018	F	16 - 60	England	No	N/A	1.1.163.336.1558.1826.2751	Available	1		SRR7850101			PRJNA315192	3.6.1	CipR_parent	strong	1.1.163.336.1558	No	No
SRR7826968	2018	F	16 - 60	England	Yes	Asia	1.1.163.336.1563.1831.2761	Available	1		SRR7826968			PRJNA315192	3.6.1	CipR_parent	strong	1.1.163.336.1563	No	No
SRR7230247	2017	M	16 - 60	England	Yes	Asia	1.1.163.682.1117.1249.1666	Available	1		SRR7230247			PRJNA315192	3.6.1	CipR_parent	strong	1.1.163.682.1117	No	No
SRR7236615	2017	F	16 - 60	England	Unknown	N/A	1.1.163.682.1117.1249.1666	Available	1		SRR7236615			PRJNA315192	3.6.1	CipR_parent	strong	1.1.163.682.1117	No	No
SRR7285430	2017	M	> 60	England	Unknown	N/A	1.1.163.785.1308.1512.2111	Available	1		SRR7285430			PRJNA315192	3.6.1	CipR_parent	strong	1.1.163.785.1308	No	No
SRR7191721	2018	F	16 - 60	England	Yes	Asia	1.1.163.785.1393.1621.2347	Available	1		SRR7191721			PRJNA315192	3.6.1	CipR_parent	strong	1.1.163.785.1393	No	No
SRR8591916	2019	F	> 60	England	Unknown	N/A	1.1.163.785.1704.2026.3165	Available	1		SRR8591916			PRJNA315192	3.6.1	CipR_parent	strong	1.1.163.785.1704	No	No
SRR4897090	2016	F	16 - 60	England	Yes	Europe	1.1.189.435.589.650.1026	Available	1		SRR4897090			PRJNA315192	3.6.1	CipR_parent	strong	1.1.189.435.589	No	No
SRR7266825	2016	F	16 - 60	England	Yes	Asia	1.1.189.435.589.650.871	Available	1		SRR7266825			PRJNA315192	3.6.1	CipR_parent	strong	1.1.189.435.589	No	No
SRR7286661	2016	M	16 - 60	England	Yes	Africa	1.1.213.495.709.796.1099	Available	1		SRR7286661			PRJNA315192	3.6.1	CipR_parent	strong	1.1.213.495.709	No	No
SRR7286407	2016	M	16 - 60	England	Yes	Asia	1.1.328.646.1042.1153.1501	Available	1		SRR7286407			PRJNA315192	3.6.1	CipR_parent	strong	1.1.328.646.1042	No	No
SRR7285479	2017	F	16 - 60	England	Yes	Asia	1.1.328.786.1310.1523.2128	Available	1		SRR7285479			PRJNA315192	3.6.1	CipR_parent	strong	1.1.328.786.1310	No	No
SRR7358041	2017	F	16 - 60	England	Unknown	N/A	1.1.342.676.1111.1241.1650	Available	1		SRR7358041			PRJNA315192	3.6.1	CipR_parent	strong	1.1.342.676.1111	No	No
SRR7191521	2017	M	< 16	England	Yes	Africa	1.1.373.758.1249.1431.1975	Available	1		SRR7191521			PRJNA315192	3.6.1	CipR_parent	strong	1.1.373.758.1249	No	No
SRR7358015	2017	F	16 - 60	England	Unknown	N/A	1.1.384.792.1329.1539.2167	Available	1		SRR7358015			PRJNA315192	3.6.1	CipR_parent	strong	1.1.384.792.1329	No	No
SRR7527640	2018	F	16 - 60	England	Unknown	N/A	1.1.405.842.1432.1668.2449	Available	1		SRR7527640			PRJNA315192	3.6.1	CipR_parent	strong	1.1.405.842.1432	No	No
SRR7842074	2018	F	16 - 60	England	Unknown	N/A	1.1.405.842.1432.1668.2449	Available	1		SRR7842074			PRJNA315192	3.6.1	CipR_parent	strong	1.1.405.842.1432	No	No
SRR8599083	2019	F	< 16	England	Unknown	N/A	1.1.405.842.1432.2029.3172	Available	1		SRR8599083			PRJNA315192	3.6.1	CipR_parent	strong	1.1.405.842.1432	No	No
SRR8634611	2019	F	16 - 60	England	No	N/A	1.1.405.842.1432.2029.3179	Available	1		SRR8634611			PRJNA315192	3.6.1	CipR_parent	strong	1.1.405.842.1432	No	No
SRR8861601	2019	F	16 - 60	England	No	N/A	1.1.405.842.1432.2029.3224	Available	1		SRR8861601			PRJNA315192	3.6.1	CipR_parent	strong	1.1.405.842.1432	No	No
SRR10212222	2019	M	16 - 60	England	Unknown	N/A	1.1.405.842.1845.2249.3560	Available	1		SRR10212222			PRJNA315192	3.6.1	CipR_parent	strong	1.1.405.842.1845	No	No
SRR7974362	2018	M	> 60	England	Yes	Unknown	1.1.440.929.1594.1876.2848	Available	1		SRR7974362			PRJNA315192	3.6.1	CipR_parent	strong	1.1.440.929.1594	No	No
SRR10013363	2019	F	< 16	England	No	N/A	1.1.468.1015.1810.2199.3463	Available	1		SRR10013363			PRJNA315192	3.6.1	CipR_parent	strong	1.1.468.1015.1810	No	No
SRR7204299	2017	F	16 - 60	England	Unknown	N/A	1.1.70.707.1159.1312.1759	Available	1		SRR7204299			PRJNA315192	3.6.1	CipR_parent	strong	1.1.70.707.1159	No	No
SRR7172407	2016	F	16 - 60	England	Yes	Unknown	1.157.235.522.764.855.1177	Available	1		SRR7172407			PRJNA315192	3.6.1	CipR_parent	strong	1.157.235.522.764	No	No
SRR7885955	Ref	Ref	Ref	Ref	Ref	Ref	Ref	Available	1		SRR7885955				2.1.7	Unknown	strong	Ref....		No
SRR4786271	2016	M	16 - 60	England	No	N/A	1.1.1.1.608.674.909	Available	1		SRR4786271			PRJNA315192	3.6.1.1.3.1	CipR.MSM1	strong	1.1.1.1.608	No	No
SRR4897201	2016	M	16 - 60	England	Unknown	N/A	1.1.1.389.521.571.745	Available	1		SRR4897201			PRJNA315192	3.6.1.1.3.1	CipR.MSM1	strong	1.1.1.389.521	No	No
SRR7885956	Ref	Ref	Ref	Ref	Ref	Ref	Ref	Available	1		SRR7885956				2.4.2	Unknown	strong	Ref....		No
SRR7215274	2018	M	16 - 60	England	Unknown	N/A	1.1.1.1.1127.1265.2267	Available	1		SRR7215274			PRJNA315192	3.6.1.1.2	CipR.MSM5	strong	1.1.1.1.1127	No	Yes
SRR7244316	2017	M	16 - 60	England	Unknown	N/A	1.1.1.1.1127.1265.1922	Available	1		SRR7244316			PRJNA315192	3.6.1.1.2	CipR.MSM5	strong	1.1.1.1.1127	No	Yes
SRR7249712	2017	M	16 - 60	England	No	N/A	1.1.1.1.1127.1265.1694	Available	1		SRR7249712			PRJNA315192	3.6.1.1.2	CipR.MSM5	strong	1.1.1.1.1127	No	Yes
SRR7249713	2017	M	16 - 60	England	Unknown	N/A	1.1.1.1.1127.1265.1753	Available	1		SRR7249713			PRJNA315192	3.6.1.1.2	CipR.MSM5	strong	1.1.1.1.1127	No	Yes
SRR7256962	2018	M	16 - 60	England	Unknown	N/A	1.1.1.1.1127.1265.2317	Available	1		SRR7256962			PRJNA315192	3.6.1.1.2	CipR.MSM5	strong	1.1.1.1.1127	No	Yes
SRR7257153	2017	M	16 - 60	England	Unknown	N/A	1.1.1.1.1127.1265.2173	Available	1		SRR7257153			PRJNA315192	3.6.1.1.2	CipR.MSM5	strong	1.1.1.1.1127	No	Yes
SRR7291944	2018	M	16 - 60	England	Unknown	N/A	1.1.1.1.1127.1265.2204	Available	1		SRR7291944			PRJNA315192	3.6.1.1.2	CipR.MSM5	strong	1.1.1.1.1127	No	Yes
SRR7417184	2018	M	16 - 60	England	Unknown	N/A	1.1.1.1.1127.1265.2408	Available	1		SRR7417184			PRJNA315192	3.6.1.1.2	CipR.MSM5	strong	1.1.1.1.1127	No	Yes
SRR7457851	2018	M	16 - 60	England	Unknown	N/A	1.1.1.1.1127.1265.2428	Available	1		SRR7457851			PRJNA315192	3.6.1.1.2	CipR.MSM5	strong	1.1.1.1.1127	No	Yes
SRR8523765	2019	M	> 60	England	Unknown	N/A	1.1.1.1.1127.2011.3131	Available	1		SRR8523765			PRJNA315192	3.6.1.1.2	CipR.MSM5	strong	1.1.1.1.1127	No	Yes
SRR7290925	2018	M	16 - 60	England	Unknown	N/A	1.1.1.1.1382.1609.2322	Available	1		SRR7290925			PRJNA315192	3.6.1.1.2	CipR.MSM5	strong	1.1.1.1.1382	No	Yes
SRR9222608	2019	M	16 - 60	England	Unknown	N/A	1.1.1.1.1767.2127.3335	Available	1		SRR9222608			PRJNA315192	3.6.1.1.2	CipR.MSM5	strong	1.1.1.1.1767	No	Yes
SRR9944893	2019	M	16 - 60	England	Unknown	N/A	1.1.1.1.1767.2127.3431	Available	1		SRR9944893			PRJNA315192	3.6.1.1.2	CipR.MSM5	strong	1.1.1.1.1767	No	Yes
SRR9947517	2019	M	16 - 60	England	Yes	Asia	1.1.1.1.1804.2187.3442	Available	1		SRR9947517			PRJNA315192	3.6.1.1.2	CipR.MSM5	strong	1.1.1.1.1804	No	Yes
SRR10314873	2019	M	16 - 60	England	Unknown	N/A	1.1.1.1.1880.2298.3703	Available	1		SRR10314873			PRJNA315192	3.6.1.1.2	CipR.MSM5	strong	1.1.1.1.1880	No	Yes
SRR10397410	2019	M	> 60	England	Unknown	N/A	1.1.1.1.21.1035.3727	Available	1		SRR10397410			PRJNA315192	3.6.1.1.2	CipR.MSM5	strong	1.1.1.1.21	No	Yes
SRR3531445	2016	M	16 - 60	England	No	N/A	1.1.1.1.21.508.634	Available	1		SRR3531445			PRJNA315192	3.6.1.1.2	CipR.MSM5	strong	1.1.1.1.21	No	Yes
SRR4787426	2016	M	16 - 60	England	No	N/A	1.1.1.1.21.577.759	Available	1		SRR4787426			PRJNA315192	3.6.1.1.2	CipR.MSM5	strong	1.1.1.1.21	No	Yes
SRR7167540	2017	F	16 - 60	England	Unknown	N/A	1.1.1.1.21.1035.1879	Available	1		SRR7167540			PRJNA315192	3.6.1.1.2	CipR.MSM5	strong	1.1.1.1.21	No	Yes
SRR7172303	2017	M	16 - 60	England	No	N/A	1.1.1.1.21.1035.1863	Available	1		SRR7172303			PRJNA315192	3.6.1.1.2	CipR.MSM5	strong	1.1.1.1.21	No	Yes
SRR7172430	2018	F	16 - 60	England	No	N/A	1.1.1.1.21.1035.2294	Available	1		SRR7172430			PRJNA315192	3.6.1.1.2	CipR.MSM5	strong	1.1.1.1.21	No	Yes
SRR7179994	2016	M	16 - 60	England	Unknown	N/A	1.1.1.1.21.1035.1520	Available	1		SRR7179994			PRJNA315192	3.6.1.1.2	CipR.MSM5	strong	1.1.1.1.21	No	Yes
SRR7186893	2016	M	16 - 60	England	Unknown	N/A	1.1.1.1.21.751.1032	Available	1		SRR7186893			PRJNA315192	3.6.1.1.2	CipR.MSM5	strong	1.1.1.1.21	No	Yes
SRR7187088	2017	M	16 - 60	England	Unknown	N/A	1.1.1.1.21.1035.1879	Available	1		SRR7187088			PRJNA315192	3.6.1.1.2	CipR.MSM5	strong	1.1.1.1.21	No	Yes
SRR7187857	2017	M	16 - 60	England	No	N/A	1.1.1.1.21.1035.2158	Available	1		SRR7187857			PRJNA315192	3.6.1.1.2	CipR.MSM5	strong	1.1.1.1.21	No	Yes
SRR7187885	2016	M	16 - 60	England	Unknown	N/A	1.1.1.1.21.1035.1364	Available	1		SRR7187885			PRJNA315192	3.6.1.1.2	CipR.MSM5	strong	1.1.1.1.21	No	Yes
SRR7187901	2018	M	16 - 60	England	No	N/A	1.1.1.1.21.1035.2234	Available	1		SRR7187901			PRJNA315192	3.6.1.1.2	CipR.MSM5	strong	1.1.1.1.21	No	Yes
SRR7191677	2017	M	16 - 60	England	Unknown	N/A	1.1.1.1.21.1035.1879	Available	1		SRR7191677			PRJNA315192	3.6.1.1.2	CipR.MSM5	strong	1.1.1.1.21	No	Yes
SRR7191687	2017	M	16 - 60	England	Unknown	N/A	1.1.1.1.21.1035.2062	Available	1		SRR7191687			PRJNA315192	3.6.1.1.2	CipR.MSM5	strong	1.1.1.1.21	No	Yes
SRR7204354	2017	M	16 - 60	England	No	N/A	1.1.1.1.21.1035.1879	Available	1		SRR7204354			PRJNA315192	3.6.1.1.2	CipR.MSM5	strong	1.1.1.1.21	No	Yes
SRR7221194	2017	M	> 60	England	Unknown	N/A	1.1.1.1.21.1035.1970	Available	1		SRR7221194			PRJNA315192	3.6.1.1.2	CipR.MSM5	strong	1.1.1.1.21	No	Yes
SRR7223080	2017	M	16 - 60	England	No	N/A	1.1.1.1.21.1035.1879	Available	1		SRR7223080			PRJNA315192	3.6.1.1.2	CipR.MSM5	strong	1.1.1.1.21	No	Yes
SRR7230221	2017	F	16 - 60	England	Unknown	N/A	1.1.1.1.21.1035.1811	Available	1		SRR7230221			PRJNA315192	3.6.1.1.2	CipR.MSM5	strong	1.1.1.1.21	No	Yes
SRR7230226	2017	M	16 - 60	England	No	N/A	1.1.1.1.21.1035.1879	Available	1		SRR7230226			PRJNA315192	3.6.1.1.2	CipR.MSM5	strong	1.1.1.1.21	No	Yes
SRR7230240	2017	M	16 - 60	England	Unknown	N/A	1.1.1.1.21.1035.2023	Available	1		SRR7230240			PRJNA315192	3.6.1.1.2	CipR.MSM5	strong	1.1.1.1.21	No	Yes
SRR7230391	2018	M	16 - 60	England	Unknown	N/A	1.1.1.1.21.1035.2234	Available	1		SRR7230391			PRJNA315192	3.6.1.1.2	CipR.MSM5	strong	1.1.1.1.21	No	Yes
SRR7236442	2017	M	16 - 60	England	Unknown	N/A	1.1.1.1.21.1035.1364	Available	1		SRR7236442			PRJNA315192	3.6.1.1.2	CipR.MSM5	strong	1.1.1.1.21	No	Yes
SRR7236603	2017	M	16 - 60	England	Yes	Europe	1.1.1.1.21.1035.2025	Available	1		SRR7236603			PRJNA315192	3.6.1.1.2	CipR.MSM5	strong	1.1.1.1.21	No	Yes
SRR7236627	2017	M	16 - 60	England	Unknown	N/A	1.1.1.1.21.1035.1879	Available	1		SRR7236627			PRJNA315192	3.6.1.1.2	CipR.MSM5	strong	1.1.1.1.21	No	Yes
SRR7249505	2017	M	16 - 60	England	Unknown	N/A	1.1.1.1.21.1035.1364	Available	1		SRR7249505			PRJNA315192	3.6.1.1.2	CipR.MSM5	strong	1.1.1.1.21	No	Yes
SRR7249684	2017	M	16 - 60	England	Unknown	N/A	1.1.1.1.21.1035.1364	Available	1		SRR7249684			PRJNA315192	3.6.1.1.2	CipR.MSM5	strong	1.1.1.1.21	No	Yes
SRR7251029	2017	M	> 60	England	Unknown	N/A	1.1.1.1.21.1035.1879	Available	1		SRR7251029			PRJNA315192	3.6.1.1.2	CipR.MSM5	strong	1.1.1.1.21	No	Yes
SRR7251037	2017	M	16 - 60	England	Unknown	N/A	1.1.1.1.21.1035.1879	Available	1		SRR7251037			PRJNA315192	3.6.1.1.2	CipR.MSM5	strong	1.1.1.1.21	No	Yes
SRR7251441	2017	M	16 - 60	England	Unknown	N/A	1.1.1.1.21.1035.1879	Available	1		SRR7251441			PRJNA315192	3.6.1.1.2	CipR.MSM5	strong	1.1.1.1.21	No	Yes
SRR7251476	2017	M	16 - 60	England	Unknown	N/A	1.1.1.1.21.1035.1800	Available	1		SRR7251476			PRJNA315192	3.6.1.1.2	CipR.MSM5	strong	1.1.1.1.21	No	Yes
SRR7251500	2018	F	16 - 60	England	No	N/A	1.1.1.1.21.1035.2306	Available	1		SRR7251500			PRJNA315192	3.6.1.1.2	CipR.MSM5	strong	1.1.1.1.21	No	Yes
SRR7266380	2017	M	16 - 60	England	Unknown	N/A	1.1.1.1.21.1035.1879	Available	1		SRR7266380			PRJNA315192	3.6.1.1.2	CipR.MSM5	strong	1.1.1.1.21	No	Yes
SRR7274794	2017	M	16 - 60	England	Unknown	N/A	1.1.1.1.21.1035.1879	Available	1		SRR7274794			PRJNA315192	3.6.1.1.2	CipR.MSM5	strong	1.1.1.1.21	No	Yes
SRR7274829	2017	M	16 - 60	England	Unknown	N/A	1.1.1.1.21.1035.2076	Available	1		SRR7274829			PRJNA315192	3.6.1.1.2	CipR.MSM5	strong	1.1.1.1.21	No	Yes
SRR7276916	2017	M	16 - 60	England	Unknown	N/A	1.1.1.1.21.1035.1828	Available	1		SRR7276916			PRJNA315192	3.6.1.1.2	CipR.MSM5	strong	1.1.1.1.21	No	Yes
SRR7276956	2016	M	16 - 60	England	Yes	Europe	1.1.1.1.21.1035.1520	Available	1		SRR7276956			PRJNA315192	3.6.1.1.2	CipR.MSM5	strong	1.1.1.1.21	No	Yes
SRR7283727	2017	M	16 - 60	England	Unknown	N/A	1.1.1.1.21.1035.1879	Available	1		SRR7283727			PRJNA315192	3.6.1.1.2	CipR.MSM5	strong	1.1.1.1.21	No	Yes
SRR7285579	2016	M	16 - 60	England	Yes	Unknown	1.1.1.1.21.1035.1520	Available	1		SRR7285579			PRJNA315192	3.6.1.1.2	CipR.MSM5	strong	1.1.1.1.21	No	Yes
SRR7286514	2016	M	16 - 60	England	Unknown	N/A	1.1.1.1.21.1035.1364	Available	1		SRR7286514			PRJNA315192	3.6.1.1.2	CipR.MSM5	strong	1.1.1.1.21	No	Yes
SRR7286577	2017	M	16 - 60	England	Unknown	N/A	1.1.1.1.21.1035.2176	Available	1		SRR7286577			PRJNA315192	3.6.1.1.2	CipR.MSM5	strong	1.1.1.1.21	No	Yes
SRR7291657	2017	M	16 - 60	England	Unknown	N/A	1.1.1.1.21.1035.2022	Available	1		SRR7291657			PRJNA315192	3.6.1.1.2	CipR.MSM5	strong	1.1.1.1.21	No	Yes
SRR7291660	2018	M	16 - 60	England	Unknown	N/A	1.1.1.1.21.1035.2233	Available	1		SRR7291660			PRJNA315192	3.6.1.1.2	CipR.MSM5	strong	1.1.1.1.21	No	Yes
SRR7401641	2017	M	16 - 60	England	Unknown	N/A	1.1.1.1.21.1035.1961	Available	1		SRR7401641			PRJNA315192	3.6.1.1.2	CipR.MSM5	strong	1.1.1.1.21	No	Yes
SRR7439078	2018	F	16 - 60	England	Unknown	N/A	1.1.1.1.21.1035.2294	Available	1		SRR7439078			PRJNA315192	3.6.1.1.2	CipR.MSM5	strong	1.1.1.1.21	No	Yes
SRR8166005	2018	M	16 - 60	England	No	N/A	1.1.1.1.21.1035.2952	Available	1		SRR8166005			PRJNA315192	3.6.1.1.2	CipR.MSM5	strong	1.1.1.1.21	No	Yes
SRR10005831	2019	M	16 - 60	England	Unknown	N/A	1.1.1.1.377.2053.3460	Available	1 and 2	1	SRR10005831			PRJNA315192	3.6.1.1.2	CipR.MSM5	strong	1.1.1.1.377	Yes	Yes	Present	Present	Present	Present	Absent	Absent	Present	Present	Present	Present	Present	Present	Present	Present	Present	Present	Present	Present
SRR10005855	2019	M	16 - 60	England	Unknown	N/A	1.1.1.1.377.2181.3434	Available	1 and 2	3	SRR10005855			PRJNA315192	3.6.1.1.2	CipR.MSM5	strong	1.1.1.1.377	Yes	Yes	Present	Present	Present	Present	Absent	Absent	Present	Present	Present	Present	Present	Present	Present	Present	Present	Present	Present	Present
SRR10036688	2019	M	16 - 60	England	Unknown	N/A	1.1.1.1.377.2053.3477	Available	1 and 2	1	SRR10036688			PRJNA315192	3.6.1.1.2	CipR.MSM5	strong	1.1.1.1.377	Yes	Yes	Present	Present	Present	Present	Absent	Absent	Present	Present	Present	Present	Present	Present	Present	Present	Present	Present	Present	Present
SRR10056645	2019	M	16 - 60	England	Unknown	N/A	1.1.1.1.377.394.3488	Available	1 and 2	3	SRR10056645			PRJNA315192	3.6.1.1.2	CipR.MSM5	strong	1.1.1.1.377	Yes	Yes	Present	Present	Present	Present	Absent	Absent	Present	Present	Present	Present	Present	Present	Present	Present	Present	Present	Present	Present
SRR10120191	2019	M	16 - 60	England	Unknown	N/A	1.1.1.1.377.2053.3513	Available	1 and 2	1	SRR10120191			PRJNA315192	3.6.1.1.2	CipR.MSM5	strong	1.1.1.1.377	Yes	Yes	Present	Present	Present	Present	Absent	Absent	Present	Present	Present	Present	Present	Present	Present	Present	Present	Present	Present	Present
SRR10133041	2019	M	16 - 60	England	No	N/A	1.1.1.1.377.2229.3521	Available	1 and 2	3	SRR10133041			PRJNA315192	3.6.1.1.2	CipR.MSM5	strong	1.1.1.1.377	Yes	Yes	Present	Present	Present	Present	Absent	Absent	Present	Present	Present	Present	Present	Present	Present	Present	Present	Present	Present	Present
SRR10133060	2019	M	16 - 60	England	Yes	South America	1.1.1.1.377.394.3522	Available	1 and 2	1	SRR10133060			PRJNA315192	3.6.1.1.2	CipR.MSM5	strong	1.1.1.1.377	Yes	Yes	Present	Present	Present	Present	Absent	Absent	Present	Present	Present	Present	Present	Present	Present	Present	Present	Present	Present	Present
SRR10133063	2019	M	16 - 60	England	No	N/A	1.1.1.1.377.2229.3523	Available	1 and 2	3	SRR10133063			PRJNA315192	3.6.1.1.2	CipR.MSM5	strong	1.1.1.1.377	Yes	Yes	Present	Present	Present	Present	Absent	Absent	Present	Present	Present	Present	Present	Present	Present	Present	Present	Present	Present	Present
SRR10198854	2019	M	> 60	England	Unknown	N/A	1.1.1.1.377.2123.3527	Available	1 and 2	3	SRR10198854			PRJNA315192	3.6.1.1.2	CipR.MSM5	strong	1.1.1.1.377	Yes	Yes	Present	Absent	Absent	Present	Absent	Absent	Present	Present	Present	Absent	Absent	Present	Present	Present	Present	Present	Present	Present
SRR10198857	2019	M	16 - 60	England	No	N/A	1.1.1.1.377.394.3525	Available	1 and 2	4	SRR10198857			PRJNA315192	3.6.1.1.2	CipR.MSM5	strong	1.1.1.1.377	Yes	Yes	Absent	Present	Present	Absent	Absent	Absent	Absent	Absent	Absent	Present	Present	Present	Absent	Present	Absent	Present	Present	Present
SRR10212135	2019	M	16 - 60	England	Unknown	N/A	1.1.1.1.377.394.3525	Available	1 and 2	4	SRR10212135			PRJNA315192	3.6.1.1.2	CipR.MSM5	strong	1.1.1.1.377	Yes	Yes	Absent	Present	Present	Absent	Absent	Absent	Absent	Absent	Absent	Present	Present	Present	Absent	Present	Absent	Present	Present	Present
SRR10212206	2019	M	16 - 60	England	No	N/A	1.1.1.1.377.2053.3563	Available	1 and 2	1	SRR10212206			PRJNA315192	3.6.1.1.2	CipR.MSM5	strong	1.1.1.1.377	Yes	Yes	Present	Present	Present	Present	Absent	Absent	Present	Present	Present	Present	Present	Present	Present	Present	Present	Present	Present	Present
SRR10212226	2019	M	16 - 60	England	No	N/A	1.1.1.1.377.394.3546	Available	1 and 2	4	SRR10212226			PRJNA315192	3.6.1.1.2	CipR.MSM5	strong	1.1.1.1.377	Yes	Yes	Absent	Present	Present	Absent	Absent	Absent	Absent	Absent	Absent	Present	Present	Present	Absent	Present	Absent	Present	Present	Present
SRR10219454	2019	M	16 - 60	England	No	N/A	1.1.1.1.377.2053.3557	Available	1 and 2	1	SRR10219454			PRJNA315192	3.6.1.1.2	CipR.MSM5	strong	1.1.1.1.377	Yes	Yes	Present	Present	Present	Present	Absent	Absent	Present	Present	Present	Present	Present	Present	Present	Present	Present	Present	Present	Present
SRR10228131	2019	M	16 - 60	England	Unknown	N/A	1.1.1.1.377.394.3530	Available	1 and 2	3	SRR10228131			PRJNA315192	3.6.1.1.2	CipR.MSM5	strong	1.1.1.1.377	Yes	Yes	Present	Present	Present	Present	Absent	Absent	Present	Present	Present	Present	Present	Present	Present	Present	Present	Present	Present	Present
SRR10228149	2019	M	16 - 60	England	Unknown	N/A	1.1.1.1.377.2053.3573	Available	1 and 2	1	SRR10228149			PRJNA315192	3.6.1.1.2	CipR.MSM5	strong	1.1.1.1.377	Yes	Yes	Present	Present	Present	Present	Absent	Absent	Present	Present	Present	Present	Present	Present	Present	Present	Present	Present	Present	Present
SRR10228160	2019	M	16 - 60	England	Yes	Unknown	1.1.1.1.377.394.3525	Available	1 and 2	4	SRR10228160			PRJNA315192	3.6.1.1.2	CipR.MSM5	strong	1.1.1.1.377	Yes	Yes	Absent	Present	Present	Absent	Absent	Absent	Absent	Absent	Absent	Present	Present	Present	Absent	Present	Absent	Present	Present	Present
SRR10228164	2019	M	16 - 60	England	Unknown	N/A	1.1.1.1.377.394.3533	Available	1 and 2	4	SRR10228164			PRJNA315192	3.6.1.1.2	CipR.MSM5	strong	1.1.1.1.377	Yes	Yes	Present	Present	Present	Present	Absent	Absent	Present	Present	Present	Present	Present	Present	Present	Present	Present	Present	Present	Present
SRR10236643	2019	M	16 - 60	England	Unknown	N/A	1.1.1.1.377.2229.3521	Available	1 and 2	3	SRR10236643			PRJNA315192	3.6.1.1.2	CipR.MSM5	strong	1.1.1.1.377	Yes	Yes	Present	Present	Present	Present	Absent	Absent	Present	Present	Present	Present	Present	Present	Present	Present	Present	Present	Present	Present
SRR10236651	2019	M	16 - 60	England	Yes	Europe	1.1.1.1.377.394.3660	Available	1 and 2	5	SRR10236651			PRJNA315192	3.6.1.1.2	CipR.MSM5	strong	1.1.1.1.377	Yes	Yes	Present	Present	Present	Present	Absent	Present	Present	Present	Present	Present	Present	Present	Present	Present	Present	Present	Present	Present
SRR10247130	2019	M	16 - 60	England	No	N/A	1.1.1.1.377.394.3669	Available	1 and 2	1	SRR10247130			PRJNA315192	3.6.1.1.2	CipR.MSM5	strong	1.1.1.1.377	Yes	Yes	Present	Present	Present	Present	Absent	Absent	Present	Present	Present	Present	Present	Present	Present	Present	Present	Present	Present	Present
SRR10247333	2019	M	16 - 60	England	Unknown	N/A	1.1.1.1.377.2181.3434	Available	1 and 2	3	SRR10247333			PRJNA315192	3.6.1.1.2	CipR.MSM5	strong	1.1.1.1.377	Yes	Yes	Present	Present	Present	Present	Absent	Absent	Present	Present	Present	Present	Present	Present	Present	Present	Present	Present	Present	Present
SRR10247341	2019	M	16 - 60	England	No	N/A	1.1.1.1.377.394.3675	Available	1 and 2	1	SRR10247341			PRJNA315192	3.6.1.1.2	CipR.MSM5	strong	1.1.1.1.377	Yes	Yes	Present	Present	Present	Present	Absent	Absent	Present	Present	Present	Present	Present	Present	Present	Present	Present	Present	Present	Present
SRR10271367	2019	M	16 - 60	England	Unknown	N/A	1.1.1.1.377.2053.3683	Available	1 and 2	1	SRR10271367			PRJNA315192	3.6.1.1.2	CipR.MSM5	strong	1.1.1.1.377	Yes	Yes	Present	Present	Present	Present	Absent	Absent	Present	Present	Present	Present	Present	Present	Present	Present	Present	Present	Present	Present
SRR10271372	2019	M	16 - 60	England	Unknown	N/A	1.1.1.1.377.394.3675	Available	1 and 2	1	SRR10271372			PRJNA315192	3.6.1.1.2	CipR.MSM5	strong	1.1.1.1.377	Yes	Yes	Present	Present	Present	Present	Absent	Absent	Present	Present	Present	Present	Present	Present	Present	Present	Present	Present	Present	Present
SRR10302287	2019	M	16 - 60	England	Unknown	N/A	1.1.1.1.377.394.3690	Available	1 and 2	1	SRR10302287			PRJNA315192	3.6.1.1.2	CipR.MSM5	strong	1.1.1.1.377	Yes	Yes	Present	Present	Present	Present	Absent	Absent	Present	Present	Present	Present	Present	Present	Present	Present	Present	Present	Present	Present
SRR10357098	2019	M	16 - 60	England	Unknown	N/A	1.1.1.1.377.2181.3715	Available	1 and 2	3	SRR10357098			PRJNA315192	3.6.1.1.2	CipR.MSM5	strong	1.1.1.1.377	Yes	Yes	Present	Present	Present	Present	Absent	Absent	Present	Present	Present	Present	Present	Present	Present	Present	Present	Present	Present	Present
SRR10380818	2019	M	16 - 60	England	No	N/A	1.1.1.1.377.394.3719	Available	1 and 2	1	SRR10380818			PRJNA315192	3.6.1.1.2	CipR.MSM5	strong	1.1.1.1.377	Yes	Yes	Present	Present	Present	Present	Absent	Absent	Present	Present	Present	Present	Present	Present	Present	Present	Present	Present	Present	Present
SRR10386568	2019	M	16 - 60	England	Unknown	N/A	1.1.1.1.377.2053.3724	Available	1 and 2	1	SRR10386568			PRJNA315192	3.6.1.1.2	CipR.MSM5	strong	1.1.1.1.377	Yes	Yes	Present	Present	Present	Present	Absent	Absent	Present	Present	Present	Present	Present	Present	Present	Present	Present	Present	Present	Present
SRR10397392	2019	M	16 - 60	England	Unknown	N/A	1.1.1.1.377.394.3734	Available	1 and 2	1	SRR10397392			PRJNA315192	3.6.1.1.2	CipR.MSM5	strong	1.1.1.1.377	Yes	Yes	Present	Present	Present	Present	Absent	Absent	Present	Present	Present	Present	Present	Present	Present	Present	Present	Present	Present	Present
SRR10397405	2019	M	16 - 60	England	Unknown	N/A	1.1.1.1.377.394.3525	Available	1 and 2	4	SRR10397405			PRJNA315192	3.6.1.1.2	CipR.MSM5	strong	1.1.1.1.377	Yes	Yes	Absent	Present	Present	Absent	Absent	Absent	Absent	Absent	Absent	Present	Present	Present	Absent	Present	Absent	Present	Present	Present
SRR10397409	2019	M	16 - 60	England	No	N/A	1.1.1.1.377.394.3675	Available	1 and 2	1	SRR10397409			PRJNA315192	3.6.1.1.2	CipR.MSM5	strong	1.1.1.1.377	Yes	Yes	Present	Present	Present	Present	Absent	Absent	Present	Present	Present	Present	Present	Present	Present	Present	Present	Present	Present	Present
SRR10403899	2019	M	16 - 60	England	Unknown	N/A	1.1.1.1.377.2165.3731	Available	1 and 2	1	SRR10403899			PRJNA315192	3.6.1.1.2	CipR.MSM5	strong	1.1.1.1.377	Yes	Yes	Present	Present	Present	Present	Absent	Absent	Present	Present	Present	Present	Present	Present	Present	Present	Present	Present	Present	Present
SRR10419612	2019	M	16 - 60	England	Unknown	N/A	1.1.1.1.377.394.3741	Available	1 and 2	4	SRR10419612			PRJNA315192	3.6.1.1.2	CipR.MSM5	strong	1.1.1.1.377	Yes	Yes	Present	Absent	Absent	Present	Absent	Absent	Present	Present	Present	Absent	Absent	Present	Present	Present	Present	Present	Present	Present
SRR10424219	2019	M	16 - 60	England	Unknown	N/A	1.1.1.1.377.394.3740	Available	1 and 2	1	SRR10424219			PRJNA315192	3.6.1.1.2	CipR.MSM5	strong	1.1.1.1.377	Yes	Yes	Present	Absent	Absent	Present	Absent	Absent	Present	Present	Present	Absent	Absent	Present	Present	Present	Present	Present	Present	Present
SRR10466993	2019	M	16 - 60	England	Unknown	N/A	1.1.1.1.377.394.3759	Available	1 and 2	4	SRR10466993			PRJNA315192	3.6.1.1.2	CipR.MSM5	strong	1.1.1.1.377	Yes	Yes	Present	Present	Present	Present	Absent	Absent	Present	Present	Present	Present	Present	Present	Present	Present	Present	Present	Present	Present
SRR10519435	2019	F	16 - 60	England	Unknown	N/A	1.1.1.1.377.394.3768	Available	1 and 2	1	SRR10519435			PRJNA315192	3.6.1.1.2	CipR.MSM5	strong	1.1.1.1.377	Yes	Yes	Present	Present	Present	Present	Absent	Absent	Present	Present	Present	Present	Present	Present	Present	Present	Present	Present	Present	Present
SRR10519443	2019	M	16 - 60	England	Unknown	N/A	1.1.1.1.377.394.3779	Available	1 and 2	4	SRR10519443			PRJNA315192	3.6.1.1.2	CipR.MSM5	strong	1.1.1.1.377	Yes	Yes	Present	Present	Present	Present	Absent	Absent	Present	Present	Present	Present	Present	Present	Present	Present	Present	Present	Present	Present
SRR10519464	2019	M	16 - 60	England	Unknown	N/A	1.1.1.1.377.394.3759	Available	1 and 2	4	SRR10519464			PRJNA315192	3.6.1.1.2	CipR.MSM5	strong	1.1.1.1.377	Yes	Yes	Present	Present	Present	Present	Absent	Absent	Present	Present	Present	Present	Present	Present	Present	Present	Present	Present	Present	Present
SRR10527361	2019	M	16 - 60	England	Unknown	N/A	1.1.1.1.377.394.3675	Available	1 and 2	1	SRR10527361			PRJNA315192	3.6.1.1.2	CipR.MSM5	strong	1.1.1.1.377	Yes	Yes	Present	Present	Present	Present	Absent	Absent	Present	Present	Present	Present	Present	Present	Present	Present	Present	Present	Present	Present
SRR10559562	2019	F	> 60	England	Unknown	N/A	1.1.1.1.377.394.3793	Available	1 and 2	1	SRR10559562			PRJNA315192	3.6.1.1.2	CipR.MSM5	strong	1.1.1.1.377	Yes	Yes	Present	Present	Present	Present	Absent	Absent	Present	Present	Present	Present	Present	Present	Present	Present	Present	Present	Present	Present
SRR10559595	2019	F	16 - 60	England	No	N/A	1.1.1.1.377.394.3798	Available	1 and 2	4	SRR10559595			PRJNA315192	3.6.1.1.2	CipR.MSM5	strong	1.1.1.1.377	Yes	Yes	Present	Present	Present	Present	Absent	Absent	Present	Present	Present	Present	Present	Present	Present	Present	Present	Present	Present	Present
SRR10559611	2019	M	16 - 60	England	Unknown	N/A	1.1.1.1.377.394.3796	Available	1 and 2	3	SRR10559611			PRJNA315192	3.6.1.1.2	CipR.MSM5	strong	1.1.1.1.377	Yes	Yes	Absent	Present	Present	Absent	Absent	Absent	Absent	Present	Absent	Present	Present	Present	Absent	Present	Absent	Present	Present	Present
SRR10566687	2019	M	16 - 60	England	Unknown	N/A	1.1.1.1.377.394.3799	Available	1 and 2	1	SRR10566687			PRJNA315192	3.6.1.1.2	CipR.MSM5	strong	1.1.1.1.377	Yes	Yes	Present	Present	Present	Present	Absent	Absent	Present	Present	Present	Present	Present	Present	Present	Present	Present	Present	Present	Present
SRR10598975	2019	M	16 - 60	England	Yes	Europe	1.1.1.1.377.394.3803	Available	1 and 2	1	SRR10598975			PRJNA315192	3.6.1.1.2	CipR.MSM5	strong	1.1.1.1.377	Yes	Yes	Present	Present	Present	Present	Absent	Absent	Present	Present	Present	Present	Present	Present	Present	Present	Present	Present	Present	Present
SRR10599015	2019	M	16 - 60	England	Unknown	N/A	1.1.1.1.377.394.3759	Available	1 and 2	4	SRR10599015			PRJNA315192	3.6.1.1.2	CipR.MSM5	strong	1.1.1.1.377	Yes	Yes	Present	Present	Present	Present	Absent	Absent	Present	Present	Present	Present	Present	Present	Present	Present	Present	Present	Present	Present
SRR10599116	2019	M	16 - 60	England	Unknown	N/A	1.1.1.1.377.394.3675	Available	1 and 2	1	SRR10599116			PRJNA315192	3.6.1.1.2	CipR.MSM5	strong	1.1.1.1.377	Yes	Yes	Present	Present	Present	Present	Absent	Absent	Present	Present	Present	Present	Present	Present	Present	Present	Present	Present	Present	Present
SRR10599991	2019	M	16 - 60	England	No	N/A	1.1.1.1.377.394.3803	Available	1 and 2	1	SRR10599991			PRJNA315192	3.6.1.1.2	CipR.MSM5	strong	1.1.1.1.377	Yes	Yes	Present	Present	Present	Present	Absent	Absent	Present	Present	Present	Present	Present	Present	Present	Present	Present	Present	Present	Present
SRR10605725	2019	M	16 - 60	England	Unknown	N/A	1.1.1.1.377.394.3675	Available	1 and 2	1	SRR10605725			PRJNA315192	3.6.1.1.2	CipR.MSM5	strong	1.1.1.1.377	Yes	Yes	Present	Present	Present	Present	Absent	Absent	Present	Present	Present	Present	Present	Present	Present	Present	Present	Present	Present	Present
SRR10698329	2019	M	16 - 60	England	Unknown	N/A	1.1.1.1.377.394.3821	Available	1 and 2	4	SRR10698329			PRJNA315192	3.6.1.1.2	CipR.MSM5	strong	1.1.1.1.377	Yes	Yes	Present	Present	Present	Present	Absent	Absent	Present	Present	Present	Present	Present	Present	Present	Present	Present	Present	Present	Present
SRR10741850	2019	M	16 - 60	England	No	N/A	1.1.1.1.377.2053.3827	Available	1 and 2	1	SRR10741850			PRJNA315192	3.6.1.1.2	CipR.MSM5	strong	1.1.1.1.377	Yes	Yes	Present	Present	Present	Present	Absent	Absent	Present	Present	Present	Present	Present	Present	Present	Present	Present	Present	Present	Present
SRR10742422	2019	M	16 - 60	England	Unknown	N/A	1.1.1.1.377.394.3675	Available	1 and 2	1	SRR10742422			PRJNA315192	3.6.1.1.2	CipR.MSM5	strong	1.1.1.1.377	Yes	Yes	Present	Present	Present	Present	Absent	Absent	Present	Present	Present	Present	Present	Present	Present	Present	Present	Present	Present	Present
SRR10748691	2019	M	16 - 60	England	Unknown	N/A	1.1.1.1.377.394.3834	Available	1 and 2	4	SRR10748691			PRJNA315192	3.6.1.1.2	CipR.MSM5	strong	1.1.1.1.377	Yes	Yes	Present	Present	Present	Present	Absent	Absent	Present	Present	Present	Present	Present	Present	Present	Present	Present	Present	Present	Present
SRR10760841	2019	M	16 - 60	England	Yes	Europe	1.1.1.1.377.2229.3837	Available	1 and 2	3	SRR10760841			PRJNA315192	3.6.1.1.2	CipR.MSM5	strong	1.1.1.1.377	Yes	Yes	Present	Present	Present	Present	Absent	Absent	Present	Present	Present	Present	Present	Present	Present	Present	Present	Present	Present	Present
SRR10760851	2019	M	16 - 60	England	Unknown	N/A	1.1.1.1.377.2382.3840	Available	1 and 2	4	SRR10760851			PRJNA315192	3.6.1.1.2	CipR.MSM5	strong	1.1.1.1.377	Yes	Yes	Present	Present	Present	Present	Absent	Absent	Present	Present	Present	Present	Present	Present	Present	Present	Present	Present	Present	Present
SRR10806408	2019	M	16 - 60	England	Unknown	N/A	1.1.1.1.377.2389.3856	Available	1 and 2	4	SRR10806408			PRJNA315192	3.6.1.1.2	CipR.MSM5	strong	1.1.1.1.377	Yes	Yes	Absent	Absent	Absent	Absent	Absent	Absent	Absent	Present	Present	Absent	Absent	Present	Absent	Present	Present	Present	Present	Present
SRR10858714	2019	M	> 60	England	Yes	Europe	1.1.1.1.377.2394.3863	Available	1 and 2	4	SRR10858714			PRJNA315192	3.6.1.1.2	CipR.MSM5	strong	1.1.1.1.377	Yes	Yes	Present	Absent	Absent	Present	Absent	Absent	Present	Present	Present	Absent	Absent	Present	Present	Present	Present	Present	Present	Present
SRR10858718	2019	M	16 - 60	England	Unknown	N/A	1.1.1.1.377.2389.3864	Available	1 and 2	4	SRR10858718			PRJNA315192	3.6.1.1.2	CipR.MSM5	strong	1.1.1.1.377	Yes	Yes	Absent	Absent	Absent	Absent	Absent	Absent	Absent	Present	Present	Absent	Absent	Present	Absent	Present	Present	Present	Present	Present
SRR10858745	2019	M	16 - 60	England	No	N/A	1.1.1.1.377.394.3866	Available	1 and 2	1	SRR10858745			PRJNA315192	3.6.1.1.2	CipR.MSM5	strong	1.1.1.1.377	Yes	Yes	Present	Present	Present	Present	Absent	Absent	Present	Present	Present	Present	Present	Present	Present	Present	Present	Present	Present	Present
SRR10874268	2020	M	16 - 60	England	Unknown	N/A	1.1.1.1.377.394.3803	Available	1 and 2	1	SRR10874268			PRJNA315192	3.6.1.1.2	CipR.MSM5	strong	1.1.1.1.377	Yes	Yes	Present	Present	Present	Present	Absent	Absent	Present	Present	Present	Present	Present	Present	Present	Present	Present	Present	Present	Present
SRR10874275	2020	M	16 - 60	England	No	N/A	1.1.1.1.377.394.3821	Available	1 and 2	4	SRR10874275			PRJNA315192	3.6.1.1.2	CipR.MSM5	strong	1.1.1.1.377	Yes	Yes	Present	Present	Present	Present	Absent	Absent	Present	Present	Present	Present	Present	Present	Present	Present	Present	Present	Present	Present
SRR10874279	2020	M	16 - 60	England	Unknown	N/A	1.1.1.1.377.394.3869	Available	1 and 2	4	SRR10874279			PRJNA315192	3.6.1.1.2	CipR.MSM5	strong	1.1.1.1.377	Yes	Yes	Present	Present	Present	Present	Absent	Absent	Present	Present	Present	Present	Present	Present	Present	Present	Present	Present	Present	Present
SRR10879425	2020	M	16 - 60	England	Unknown	N/A	1.1.1.1.377.2389.3871	Available	1 and 2	4	SRR10879425			PRJNA315192	3.6.1.1.2	CipR.MSM5	strong	1.1.1.1.377	Yes	Yes	Absent	Absent	Absent	Absent	Absent	Absent	Absent	Present	Present	Absent	Absent	Present	Absent	Present	Present	Present	Present	Present
SRR10915001	2020	M	16 - 60	England	Unknown	N/A	1.1.1.1.377.394.3859	Available	1 and 2	4	SRR10915001			PRJNA315192	3.6.1.1.2	CipR.MSM5	strong	1.1.1.1.377	Yes	Yes	Present	Absent	Absent	Present	Absent	Absent	Present	Present	Present	Absent	Absent	Present	Present	Present	Present	Present	Present	Present
SRR10916960	2020	M	16 - 60	England	Unknown	N/A	1.1.1.1.377.394.3888	Available	1 and 2	4	SRR10916960			PRJNA315192	3.6.1.1.2	CipR.MSM5	strong	1.1.1.1.377	Yes	Yes	Present	Present	Present	Present	Absent	Absent	Present	Present	Present	Present	Present	Present	Present	Present	Present	Present	Present	Present
SRR10962096	2020	M	16 - 60	England	Unknown	N/A	1.1.1.1.377.394.3675	Available	1 and 2	1	SRR10962096			PRJNA315192	3.6.1.1.2	CipR.MSM5	strong	1.1.1.1.377	Yes	Yes	Present	Present	Present	Present	Absent	Absent	Present	Present	Present	Present	Present	Present	Present	Present	Present	Present	Present	Present
SRR10962107	2020	M	16 - 60	England	Unknown	N/A	1.1.1.1.377.394.3891	Available	1 and 2	1	SRR10962107			PRJNA315192	3.6.1.1.2	CipR.MSM5	strong	1.1.1.1.377	Yes	Yes	Present	Present	Present	Present	Absent	Absent	Present	Present	Present	Present	Present	Present	Present	Present	Present	Present	Present	Present
SRR10962112	2020	M	16 - 60	England	Unknown	N/A	1.1.1.1.377.394.3891	Available	1 and 2	1	SRR10962112			PRJNA315192	3.6.1.1.2	CipR.MSM5	strong	1.1.1.1.377	Yes	Yes	Present	Present	Present	Present	Absent	Absent	Present	Present	Present	Present	Present	Present	Present	Present	Present	Present	Present	Present
SRR10971409	2020	M	16 - 60	England	No	N/A	1.1.1.1.377.2389.3871	Available	1 and 2	4	SRR10971409			PRJNA315192	3.6.1.1.2	CipR.MSM5	strong	1.1.1.1.377	Yes	Yes	Absent	Absent	Absent	Absent	Absent	Absent	Absent	Present	Present	Absent	Absent	Present	Absent	Present	Present	Present	Present	Present
SRR10971421	2020	M	16 - 60	England	Unknown	N/A	1.1.1.1.377.2389.3894	Available	1 and 2	4	SRR10971421			PRJNA315192	3.6.1.1.2	CipR.MSM5	strong	1.1.1.1.377	Yes	Yes	Absent	Absent	Absent	Absent	Absent	Absent	Absent	Present	Present	Absent	Absent	Present	Absent	Present	Present	Present	Present	Present
SRR11016592	2020	F	16 - 60	England	No	N/A	1.1.1.1.377.394.3869	Available	1 and 2	4	SRR11016592			PRJNA315192	3.6.1.1.2	CipR.MSM5	strong	1.1.1.1.377	Yes	Yes	Present	Present	Present	Present	Absent	Absent	Present	Present	Present	Present	Present	Present	Present	Present	Present	Present	Present	Present
SRR11016597	2020	M	16 - 60	England	No	N/A	1.1.1.1.377.2389.3871	Available	1 and 2	4	SRR11016597			PRJNA315192	3.6.1.1.2	CipR.MSM5	strong	1.1.1.1.377	Yes	Yes	Absent	Absent	Absent	Absent	Absent	Absent	Absent	Present	Present	Absent	Absent	Present	Absent	Present	Present	Present	Present	Present
SRR11041457	2020	M	16 - 60	England	Unknown	N/A	1.1.1.1.377.394.3915	Available	1 and 2	3	SRR11041457			PRJNA315192	3.6.1.1.2	CipR.MSM5	strong	1.1.1.1.377	Yes	Yes	Absent	Present	Present	Absent	Absent	Absent	Absent	Present	Absent	Present	Present	Present	Absent	Present	Absent	Present	Present	Present
SRR11048309	2020	M	16 - 60	England	Unknown	N/A	1.1.1.1.377.2389.3917	Available	1 and 2	4	SRR11048309			PRJNA315192	3.6.1.1.2	CipR.MSM5	strong	1.1.1.1.377	Yes	Yes	Absent	Absent	Absent	Absent	Absent	Absent	Absent	Present	Present	Absent	Absent	Present	Absent	Present	Present	Present	Present	Present
SRR11048338	2020	M	> 60	England	Unknown	N/A	1.1.1.1.377.2389.3921	Available	1 and 2	4	SRR11048338			PRJNA315192	3.6.1.1.2	CipR.MSM5	strong	1.1.1.1.377	Yes	Yes	Absent	Absent	Absent	Absent	Absent	Absent	Absent	Present	Present	Absent	Absent	Present	Absent	Present	Present	Present	Present	Present
SRR11080624	2020	M	16 - 60	England	Unknown	N/A	1.1.1.1.377.2389.3924	Available	1 and 2	4	SRR11080624			PRJNA315192	3.6.1.1.2	CipR.MSM5	strong	1.1.1.1.377	Yes	Yes	Absent	Absent	Absent	Absent	Absent	Absent	Absent	Present	Present	Absent	Absent	Present	Absent	Present	Present	Present	Present	Present
SRR11096683	2020	M	16 - 60	England	Unknown	N/A	1.1.1.1.377.2389.3933	Available	1 and 2	4	SRR11096683			PRJNA315192	3.6.1.1.2	CipR.MSM5	strong	1.1.1.1.377	Yes	Yes	Absent	Absent	Absent	Absent	Absent	Absent	Absent	Present	Present	Absent	Absent	Present	Absent	Present	Present	Present	Present	Present
SRR11096700	2020	M	16 - 60	England	Unknown	N/A	1.1.1.1.377.394.3930	Available	1 and 2	1	SRR11096700			PRJNA315192	3.6.1.1.2	CipR.MSM5	strong	1.1.1.1.377	Yes	Yes	Present	Present	Present	Present	Absent	Absent	Present	Present	Present	Present	Present	Present	Present	Present	Present	Present	Present	Present
SRR11142340	2020	M	16 - 60	England	Unknown	N/A	1.1.1.1.377.394.3869	Available	1 and 2	4	SRR11142340			PRJNA315192	3.6.1.1.2	CipR.MSM5	strong	1.1.1.1.377	Yes	Yes	Present	Present	Present	Present	Absent	Absent	Present	Present	Present	Present	Present	Present	Present	Present	Present	Present	Present	Present
SRR11195324	2020	M	16 - 60	England	Yes	Europe	1.1.1.1.377.2389.3944	Available	1 and 2	4	SRR11195324			PRJNA315192	3.6.1.1.2	CipR.MSM5	strong	1.1.1.1.377	Yes	Yes	Absent	Absent	Absent	Absent	Absent	Absent	Absent	Present	Present	Absent	Absent	Present	Absent	Present	Present	Present	Present	Present
SRR11206407	2020	M	16 - 60	England	No	N/A	1.1.1.1.377.394.3880	Available	1 and 2	5	SRR11206407			PRJNA315192	3.6.1.1.2	CipR.MSM5	strong	1.1.1.1.377	Yes	Yes	Present	Present	Present	Absent	Present	Present	Present	Present	Present	Present	Present	Present	Present	Present	Present	Present	Present	Present
SRR11206529	2020	M	16 - 60	England	Unknown	N/A	1.1.1.1.377.394.3945	Available	1 and 2	3	SRR11206529			PRJNA315192	3.6.1.1.2	CipR.MSM5	strong	1.1.1.1.377	Yes	Yes	Present	Present	Present	Present	Absent	Absent	Present	Present	Present	Present	Present	Present	Present	Present	Present	Present	Present	Present
SRR11215155	2020	M	16 - 60	England	No	N/A	1.1.1.1.377.394.3951	Available	1 and 2	4	SRR11215155			PRJNA315192	3.6.1.1.2	CipR.MSM5	strong	1.1.1.1.377	Yes	Yes	Present	Present	Present	Present	Absent	Absent	Present	Present	Present	Present	Present	Present	Present	Present	Present	Present	Present	Present
SRR11215168	2020	M	16 - 60	England	Unknown	N/A	1.1.1.1.377.394.3764	Available	1 and 2	4	SRR11215168			PRJNA315192	3.6.1.1.2	CipR.MSM5	strong	1.1.1.1.377	Yes	Yes	Present	Present	Present	Present	Absent	Absent	Present	Present	Present	Present	Present	Present	Present	Present	Present	Present	Present	Present
SRR11361399	2020	M	16 - 60	England	Unknown	N/A	1.1.1.1.377.394.3880	Available	1 and 2	3	SRR11361399			PRJNA315192	3.6.1.1.2	CipR.MSM5	strong	1.1.1.1.377	Yes	Yes	Absent	Present	Present	Absent	Absent	Absent	Absent	Present	Absent	Present	Present	Present	Absent	Present	Absent	Present	Present	Present
SRR11361747	2020	M	16 - 60	England	No	N/A	1.1.1.1.377.394.3976	Available	1 and 2	3	SRR11361747			PRJNA315192	3.6.1.1.2	CipR.MSM5	strong	1.1.1.1.377	Yes	Yes	Present	Present	Present	Present	Absent	Absent	Present	Present	Present	Present	Present	Present	Present	Present	Present	Present	Present	Present
SRR11361777	2020	M	16 - 60	England	Unknown	N/A	1.1.1.1.377.2229.3959	Available	1 and 2	3	SRR11361777			PRJNA315192	3.6.1.1.2	CipR.MSM5	strong	1.1.1.1.377	Yes	Yes	Present	Present	Present	Present	Absent	Absent	Present	Present	Present	Present	Present	Present	Present	Present	Present	Present	Present	Present
SRR11361780	2020	M	16 - 60	England	Unknown	N/A	1.1.1.1.377.394.3975	Available	1 and 2	3	SRR11361780			PRJNA315192	3.6.1.1.2	CipR.MSM5	strong	1.1.1.1.377	Yes	Yes	Absent	Present	Present	Absent	Absent	Absent	Absent	Present	Absent	Present	Present	Present	Absent	Present	Absent	Present	Present	Present
SRR11361817	2020	M	16 - 60	England	Unknown	N/A	1.1.1.1.377.394.3969	Available	1 and 2	4	SRR11361817			PRJNA315192	3.6.1.1.2	CipR.MSM5	strong	1.1.1.1.377	Yes	Yes	Absent	Present	Present	Absent	Absent	Absent	Absent	Absent	Absent	Present	Present	Present	Absent	Present	Absent	Present	Present	Present
SRR11361819	2020	M	16 - 60	England	Unknown	N/A	1.1.1.1.377.2389.3871	Available	1 and 2	4	SRR11361819			PRJNA315192	3.6.1.1.2	CipR.MSM5	strong	1.1.1.1.377	Yes	Yes	Absent	Absent	Absent	Absent	Absent	Absent	Absent	Present	Present	Absent	Absent	Present	Absent	Present	Present	Present	Present	Present
SRR11361852	2020	M	16 - 60	England	No	N/A	1.1.1.1.377.2229.3521	Available	1 and 2	3	SRR11361852			PRJNA315192	3.6.1.1.2	CipR.MSM5	strong	1.1.1.1.377	Yes	Yes	Present	Present	Present	Present	Absent	Absent	Present	Present	Present	Present	Present	Present	Present	Present	Present	Present	Present	Present
SRR11361855	2020	M	16 - 60	England	Unknown	N/A	1.1.1.1.377.2389.3871	Available	1 and 2	4	SRR11361855			PRJNA315192	3.6.1.1.2	CipR.MSM5	strong	1.1.1.1.377	Yes	Yes	Absent	Absent	Absent	Absent	Absent	Absent	Absent	Present	Present	Absent	Absent	Present	Absent	Present	Present	Present	Present	Present
SRR11361862	2020	M	16 - 60	England	Yes	Unknown	1.1.1.1.377.2444.3972	Available	1 and 2	5	SRR11361862			PRJNA315192	3.6.1.1.2	CipR.MSM5	strong	1.1.1.1.377	Yes	Yes	Present	Present	Present	Absent	Present	Present	Present	Present	Present	Present	Present	Present	Present	Present	Present	Present	Present	Present
SRR11361864	2020	M	16 - 60	England	Unknown	N/A	1.1.1.1.377.2229.3965	Available	1 and 2	3	SRR11361864			PRJNA315192	3.6.1.1.2	CipR.MSM5	strong	1.1.1.1.377	Yes	Yes	Present	Present	Present	Present	Absent	Absent	Present	Present	Present	Present	Present	Present	Present	Present	Present	Present	Present	Present
SRR11363385	2020	M	16 - 60	England	No	N/A	1.1.1.1.377.2229.3961	Available	1 and 2	3	SRR11363385			PRJNA315192	3.6.1.1.2	CipR.MSM5	strong	1.1.1.1.377	Yes	Yes	Present	Present	Present	Present	Absent	Absent	Present	Present	Present	Present	Present	Present	Present	Present	Present	Present	Present	Present
SRR11425054	2020	M	16 - 60	England	No	N/A	1.1.1.1.377.394.3976	Available	1 and 2	3	SRR11425054			PRJNA315192	3.6.1.1.2	CipR.MSM5	strong	1.1.1.1.377	Yes	Yes	Present	Present	Present	Present	Absent	Absent	Present	Present	Present	Present	Present	Present	Present	Present	Present	Present	Present	Present
SRR11442258	2020	M	16 - 60	England	Unknown	N/A	1.1.1.1.377.394.3981	Available	1 and 2	4	SRR11442258			PRJNA315192	3.6.1.1.2	CipR.MSM5	strong	1.1.1.1.377	Yes	Yes	Present	Present	Present	Present	Absent	Absent	Present	Present	Present	Present	Present	Present	Present	Present	Present	Present	Present	Present
SRR11442273	2020	M	16 - 60	England	Unknown	N/A	1.1.1.1.377.394.3821	Available	1 and 2	4	SRR11442273			PRJNA315192	3.6.1.1.2	CipR.MSM5	strong	1.1.1.1.377	Yes	Yes	Present	Present	Present	Present	Absent	Absent	Present	Present	Present	Present	Present	Present	Present	Present	Present	Present	Present	Present
SRR11442297	2020	M	16 - 60	England	Unknown	N/A	1.1.1.1.377.2229.3983	Available	1 and 2	3	SRR11442297			PRJNA315192	3.6.1.1.2	CipR.MSM5	strong	1.1.1.1.377	Yes	Yes	Present	Present	Present	Present	Absent	Absent	Present	Present	Present	Present	Present	Present	Present	Present	Present	Present	Present	Present
SRR11456904	2020	M	16 - 60	England	No	N/A	1.1.1.1.377.394.3985	Available	1 and 2	4	SRR11456904			PRJNA315192	3.6.1.1.2	CipR.MSM5	strong	1.1.1.1.377	Yes	Yes	Present	Present	Present	Present	Absent	Absent	Present	Present	Present	Present	Present	Present	Present	Present	Present	Present	Present	Present
SRR11467424	2020	M	16 - 60	England	Yes	Europe	1.1.1.1.377.394.3984	Available	1 and 2	4	SRR11467424			PRJNA315192	3.6.1.1.2	CipR.MSM5	strong	1.1.1.1.377	Yes	Yes	Present	Present	Present	Present	Absent	Absent	Present	Present	Present	Present	Present	Present	Present	Present	Present	Present	Present	Present
SRR11488041	2020	M	16 - 60	England	Unknown	N/A	1.1.1.1.377.2229.3959	Available	1 and 2	3	SRR11488041			PRJNA315192	3.6.1.1.2	CipR.MSM5	strong	1.1.1.1.377	Yes	Yes	Present	Present	Present	Present	Absent	Absent	Present	Present	Present	Present	Present	Present	Present	Present	Present	Present	Present	Present
SRR11488049	2020	M	16 - 60	England	Unknown	N/A	1.1.1.1.377.394.3759	Available	1 and 2	4	SRR11488049			PRJNA315192	3.6.1.1.2	CipR.MSM5	strong	1.1.1.1.377	Yes	Yes	Present	Absent	Absent	Present	Absent	Absent	Present	Present	Present	Absent	Absent	Present	Present	Present	Present	Present	Present	Present
SRR11488050	2020	M	16 - 60	England	Unknown	N/A	1.1.1.1.377.2229.3994	Available	1 and 2	3	SRR11488050			PRJNA315192	3.6.1.1.2	CipR.MSM5	strong	1.1.1.1.377	Yes	Yes	Present	Present	Present	Present	Absent	Absent	Present	Present	Present	Present	Present	Present	Present	Present	Present	Present	Present	Present
SRR11513765	2020	F	16 - 60	England	Unknown	N/A	1.1.1.1.377.394.3821	Available	1 and 2	4	SRR11513765			PRJNA315192	3.6.1.1.2	CipR.MSM5	strong	1.1.1.1.377	Yes	Yes	Present	Present	Present	Present	Absent	Absent	Present	Present	Present	Present	Present	Present	Present	Present	Present	Present	Present	Present
SRR11514034	2020	M	> 60	England	Yes	Europe	1.1.1.1.377.394.3991	Available	1 and 2	4	SRR11514034			PRJNA315192	3.6.1.1.2	CipR.MSM5	strong	1.1.1.1.377	Yes	Yes	Present	Absent	Absent	Present	Absent	Absent	Present	Present	Present	Absent	Absent	Present	Present	Present	Present	Present	Present	Present
SRR11583619	2020	M	16 - 60	England	Unknown	N/A	1.1.1.1.377.394.3759	Available	1 and 2	4	SRR11583619			PRJNA315192	3.6.1.1.2	CipR.MSM5	strong	1.1.1.1.377	Yes	Yes	Present	Present	Present	Present	Absent	Absent	Present	Present	Present	Present	Present	Present	Present	Present	Present	Present	Present	Present
SRR11583624	2020	F	16 - 60	England	Unknown	N/A	1.1.1.1.377.394.3821	Available	1 and 2	4	SRR11583624			PRJNA315192	3.6.1.1.2	CipR.MSM5	strong	1.1.1.1.377	Yes	Yes	Present	Present	Present	Present	Absent	Absent	Present	Present	Present	Present	Present	Present	Present	Present	Present	Present	Present	Present
SRR11657088	2020	F	16 - 60	England	Unknown	N/A	1.1.1.1.377.2229.3999	Available	1 and 2	3	SRR11657088			PRJNA315192	3.6.1.1.2	CipR.MSM5	strong	1.1.1.1.377	Yes	Yes	Present	Absent	Absent	Present	Absent	Absent	Present	Present	Present	Absent	Absent	Present	Present	Present	Present	Present	Present	Present
SRR11812394	2020	M	16 - 60	England	Unknown	N/A	1.1.1.1.377.394.3985	Available	1 and 2	4	SRR11812394			PRJNA315192	3.6.1.1.2	CipR.MSM5	strong	1.1.1.1.377	Yes	Yes	Present	Present	Present	Present	Absent	Absent	Present	Present	Present	Present	Present	Present	Present	Present	Present	Present	Present	Present
SRR11927480	2020	M	16 - 60	England	Unknown	N/A	1.1.1.1.377.2229.4007	Available	1 and 2	3	SRR11927480			PRJNA315192	3.6.1.1.2	CipR.MSM5	strong	1.1.1.1.377	Yes	Yes	Present	Present	Present	Present	Absent	Absent	Present	Present	Present	Present	Present	Present	Present	Present	Present	Present	Present	Present
SRR12109949	2020	M	16 - 60	England	No	N/A	1.1.1.1.377.2229.3521	Available	1 and 2	3	SRR12109949			PRJNA315192	3.6.1.1.2	CipR.MSM5	strong	1.1.1.1.377	Yes	Yes	Present	Present	Present	Present	Absent	Absent	Present	Present	Present	Present	Present	Present	Present	Present	Present	Present	Present	Present
SRR12541337	2020	M	16 - 60	England	Unknown	N/A	1.1.1.1.377.394.4025	Available	1 and 2	1	SRR12541337			PRJNA315192	3.6.1.1.2	CipR.MSM5	strong	1.1.1.1.377	Yes	Yes	Present	Present	Present	Present	Absent	Absent	Present	Present	Present	Present	Present	Present	Present	Present	Present	Present	Present	Present
SRR12884838	2020	M	16 - 60	England	Yes	Europe	1.1.1.1.377.394.4038	Available	1 and 2	5	SRR12884838			PRJNA315192	3.6.1.1.2	CipR.MSM5	strong	1.1.1.1.377	Yes	Yes	Present	Present	Present	Absent	Present	Present	Present	Present	Present	Present	Present	Present	Present	Present	Present	Present	Present	Present
SRR12963015	2020	M	16 - 60	England	Unknown	N/A	1.1.1.1.377.394.4039	Available	1 and 2	5	SRR12963015			PRJNA315192	3.6.1.1.2	CipR.MSM5	strong	1.1.1.1.377	Yes	Yes	Present	Present	Present	Absent	Present	Present	Present	Present	Present	Present	Present	Present	Present	Present	Present	Present	Present	Present
SRR13168767	2020	F	16 - 60	England	No	N/A	1.1.1.1.377.394.4043	Available	1 and 2	5	SRR13168767			PRJNA315192	3.6.1.1.2	CipR.MSM5	strong	1.1.1.1.377	Yes	Yes	Present	Present	Present	Absent	Present	Present	Present	Present	Present	Present	Present	Present	Present	Present	Present	Present	Present	Present
SRR13239049	2020	F	16 - 60	England	Unknown	N/A	1.1.1.1.377.394.4043	Available	1 and 2	5	SRR13239049			PRJNA315192	3.6.1.1.2	CipR.MSM5	strong	1.1.1.1.377	Yes	Yes	Present	Present	Present	Absent	Present	Present	Present	Present	Present	Present	Present	Present	Present	Present	Present	Present	Present	Present
19-001-0276	2019	224 SAMPLES MALE, 8 FEMALE	AVERAGE 40 [19 - 83]	Australia (NSW)	Unknown	N/A	N/A	N/A	2	5	PENDING			PRJNA613115	3.6.1.1.2	CipR.MSM5	strong			Yes	Present	Present	Present	Present	Absent	Present	Present	Present	Present	Present	Present	Present	Present	Present	Present	Present	Present	Present
SRR13785624	2021	M	16 - 60	England	Unknown	N/A	1.1.1.1.377.394.4058	Available	1 and 2	5	SRR13785624			PRJNA315192	3.6.1.1.2	CipR.MSM5	strong	1.1.1.1.377	Yes	Yes	Present	Present	Present	Absent	Present	Present	Present	Present	Present	Present	Present	Present	Present	Present	Present	Present	Present	Present
SRR15299567	2021	M	16 - 60	England	Unknown	N/A	1.1.1.1.377.394.4094	Available	1 and 2	5	SRR15299567			PRJNA315192	3.6.1.1.2	CipR.MSM5	strong	1.1.1.1.377	Yes	Yes	Present	Present	Present	Absent	Present	Present	Present	Present	Present	Present	Present	Present	Present	Present	Present	Present	Present	Present
19-001-0407	2019	224 SAMPLES MALE, 8 FEMALE	AVERAGE 40 [19 - 83]	Australia (NSW)	Unknown	N/A	N/A	N/A	2	5	PENDING			PRJNA613115	3.6.1.1.2	CipR.MSM5	strong			Yes	Present	Present	Present	Present	Absent	Present	Present	Present	Present	Present	Present	Present	Present	Present	Present	Present	Present	Present
19-001-0632	2019	224 SAMPLES MALE, 8 FEMALE	AVERAGE 40 [19 - 83]	Australia (NSW)	Unknown	N/A	N/A	N/A	2	5	PENDING			PRJNA613115	3.6.1.1.2	CipR.MSM5	strong			Yes	Present	Present	Present	Present	Absent	Present	Present	Present	Present	Present	Present	Present	Present	Present	Present	Present	Present	Present
19-001-0640	2019	224 SAMPLES MALE, 8 FEMALE	AVERAGE 40 [19 - 83]	Australia (NSW)	Unknown	N/A	N/A	N/A	2	5	PENDING			PRJNA613115	3.6.1.1.2	CipR.MSM5	strong			Yes	Present	Present	Present	Present	Absent	Absent	Present	Present	Present	Present	Present	Present	Present	Present	Present	Present	Present	Present
SRR16842826	2021	M	16 - 60	England	Yes	Europe	1.1.1.1.377.394.4148	Available	1 and 2 and S1A	5	SRR16842826	SRR18254050	PENDING	PRJNA315192	3.6.1.1.2	CipR.MSM5	strong	1.1.1.1.377	Yes	Yes	Present	Absent	Absent	Absent	Present	Present	Present	Present	Present	Absent	Absent	Present	Present	Present	Present	Present	Present	Present
SRR16842843	2021	M	16 - 60	England	Unknown	N/A	1.1.1.1.377.394.4150	Available	1 and 2 and S1A	5	SRR16842843	SRR18254049	PENDING	PRJNA315192	3.6.1.1.2	CipR.MSM5	strong	1.1.1.1.377	Yes	Yes	Present	Present	Present	Absent	Present	Present	Present	Present	Present	Present	Present	Present	Present	Present	Present	Present	Present	Present
19-001-0642	2019	224 SAMPLES MALE, 8 FEMALE	AVERAGE 40 [19 - 83]	Australia (NSW)	Unknown	N/A	N/A	N/A	2	5	PENDING			PRJNA613115	3.6.1.1.2	CipR.MSM5	strong			Yes	Present	Present	Present	Present	Absent	Absent	Present	Present	Present	Present	Present	Present	Present	Present	Present	Present	Present	Present
SRR16966774	2021	M	16 - 60	England	Unknown	N/A	1.1.1.1.377.394.4136	Available	1 and 2	5	SRR16966774			PRJNA315192	3.6.1.1.2	CipR.MSM5	strong	1.1.1.1.377	Yes	Yes	Present	Present	Present	Absent	Present	Present	Present	Present	Present	Present	Present	Present	Present	Present	Present	Present	Present	Present
SRR16976040	2021	M	16 - 60	England	Unknown	N/A	1.1.1.1.377.394.4155	Available	1 and 2	5	SRR16976040			PRJNA315192	3.6.1.1.2	CipR.MSM5	strong	1.1.1.1.377	Yes	Yes	Present	Present	Present	Absent	Present	Present	Present	Present	Present	Present	Present	Present	Present	Present	Present	Present	Present	Present
SRR17038709	2021	M	16 - 60	England	Unknown	N/A	1.1.1.1.377.394.4136	Available	1 and 2	5	SRR17038709			PRJNA315192	3.6.1.1.2	CipR.MSM5	strong	1.1.1.1.377	Yes	Yes	Present	Present	Present	Absent	Present	Present	Present	Present	Present	Present	Present	Present	Present	Present	Present	Present	Present	Present
SRR17038716	2021	M	16 - 60	England	Unknown	N/A	1.1.1.1.377.394.4155	Available	1 and 2	5	SRR17038716			PRJNA315192	3.6.1.1.2	CipR.MSM5	strong	1.1.1.1.377	Yes	Yes	Present	Present	Present	Absent	Present	Present	Present	Present	Present	Present	Present	Present	Present	Present	Present	Present	Present	Present
SRR17038739	2021	M	16 - 60	England	Unknown	N/A	1.1.1.1.377.394.4162	Available	1 and 2	5	SRR17038739			PRJNA315192	3.6.1.1.2	CipR.MSM5	strong	1.1.1.1.377	Yes	Yes	Present	Present	Present	Absent	Present	Present	Present	Present	Present	Present	Present	Present	Present	Present	Present	Present	Present	Present
SRR17099017	2021	M	16 - 60	England	Unknown	N/A	1.1.1.1.377.394.4136	Available	1 and 2	5	SRR17099017			PRJNA315192	3.6.1.1.2	CipR.MSM5	strong	1.1.1.1.377	Yes	Yes	Present	Present	Present	Absent	Present	Present	Present	Present	Present	Present	Present	Present	Present	Present	Present	Present	Present	Present
SRR17120129	2021	M	16 - 60	England	Unknown	N/A	1.1.1.1.377.394.4148	Available	1 and 2	5	SRR17120129			PRJNA315192	3.6.1.1.2	CipR.MSM5	strong	1.1.1.1.377	Yes	Yes	Present	Absent	Absent	Absent	Present	Present	Present	Present	Present	Absent	Absent	Present	Present	Present	Present	Present	Present	Present
SRR17130661	2021	F	16 - 60	England	Unknown	N/A	1.1.1.1.377.394.4168	Available	1 and 2	5	SRR17130661			PRJNA315192	3.6.1.1.2	CipR.MSM5	strong	1.1.1.1.377	Yes	Yes	Present	Present	Present	Absent	Present	Present	Present	Present	Present	Present	Present	Present	Present	Present	Present	Present	Present	Present
SRR17130663	2021	M	16 - 60	England	Yes	Asia	1.1.1.1.377.394.4136	Available	1 and 2	5	SRR17130663			PRJNA315192	3.6.1.1.2	CipR.MSM5	strong	1.1.1.1.377	Yes	Yes	Present	Present	Present	Absent	Present	Present	Present	Present	Present	Present	Present	Present	Present	Present	Present	Present	Present	Present
19-001-0645	2019	224 SAMPLES MALE, 8 FEMALE	AVERAGE 40 [19 - 83]	Australia (NSW)	Unknown	N/A	N/A	N/A	2	5	PENDING			PRJNA613115	3.6.1.1.2	CipR.MSM5	strong			Yes	Present	Present	Present	Present	Absent	Absent	Present	Present	Present	Present	Present	Present	Present	Present	Present	Present	Present	Present
SRR17248079	2021	M	16 - 60	England	Yes	Europe	1.1.1.1.377.394.4176	Available	1 and 2	5	SRR17248079			PRJNA315192	3.6.1.1.2	CipR.MSM5	strong	1.1.1.1.377	Yes	Yes	Present	Present	Present	Absent	Present	Present	Present	Present	Present	Present	Present	Present	Present	Present	Present	Present	Present	Present
20-001-0087	2019	224 SAMPLES MALE, 8 FEMALE	AVERAGE 40 [19 - 83]	Australia (NSW)	Unknown	N/A	N/A	N/A	2	5	PENDING			PRJNA613115	3.6.1.1.2	CipR.MSM5	strong			Yes	Present	Present	Present	Present	Absent	Present	Present	Present	Present	Present	Present	Present	Present	Present	Present	Present	Present	Present
20-001-0088	2019	224 SAMPLES MALE, 8 FEMALE	AVERAGE 40 [19 - 83]	Australia (NSW)	Unknown	N/A	N/A	N/A	2	5	PENDING			PRJNA613115	3.6.1.1.2	CipR.MSM5	strong			Yes	Present	Present	Present	Absent	Present	Present	Present	Present	Present	Present	Present	Present	Present	Present	Present	Present	Present	Present
SRR17269288	2021	M	16 - 60	England	Unknown	N/A	1.1.1.1.377.394.4136	Available	1 and 2	5	SRR17269288			PRJNA315192	3.6.1.1.2	CipR.MSM5	strong	1.1.1.1.377	Yes	Yes	Present	Present	Present	Absent	Present	Present	Present	Present	Present	Present	Present	Present	Present	Present	Present	Present	Present	Present
SRR17281158	2021	M	16 - 60	England	Unknown	N/A	1.1.1.1.377.394.4136	Available	1 and 2	5	SRR17281158			PRJNA315192	3.6.1.1.2	CipR.MSM5	strong	1.1.1.1.377	Yes	Yes	Present	Present	Present	Absent	Present	Present	Present	Present	Present	Present	Present	Present	Present	Present	Present	Present	Present	Present
SRR17281192	2021	F	16 - 60	England	Unknown	N/A	1.1.1.1.377.394.4185	Available	1 and 2	5	SRR17281192			PRJNA315192	3.6.1.1.2	CipR.MSM5	strong	1.1.1.1.377	Yes	Yes	Present	Absent	Absent	Absent	Present	Present	Present	Present	Present	Absent	Absent	Present	Present	Present	Present	Present	Present	Present
SRR17322489	2021	M	16 - 60	England	Unknown	N/A	1.1.1.1.377.394.4195	Available	1 and 2	5	SRR17322489			PRJNA315192	3.6.1.1.2	CipR.MSM5	strong	1.1.1.1.377	Yes	Yes	Present	Present	Present	Absent	Present	Present	Present	Present	Present	Present	Present	Present	Present	Present	Present	Present	Present	Present
SRR17322492	2021	F	16 - 60	England	Unknown	N/A	1.1.1.1.377.2577.4194	Available	1 and 2	5	SRR17322492			PRJNA315192	3.6.1.1.2	CipR.MSM5	strong	1.1.1.1.377	Yes	Yes	Present	Absent	Absent	Absent	Present	Present	Present	Present	Present	Absent	Absent	Present	Present	Present	Present	Present	Present	Present
SRR17327780	2021	M	16 - 60	England	Unknown	N/A	1.1.1.1.377.394.4136	Available	1 and 2	5	SRR17327780			PRJNA315192	3.6.1.1.2	CipR.MSM5	strong	1.1.1.1.377	Yes	Yes	Present	Present	Present	Absent	Present	Present	Present	Present	Present	Present	Present	Present	Present	Present	Present	Present	Present	Present
SRR17327793	2021	M	16 - 60	England	Unknown	N/A	1.1.1.1.377.394.4197	Available	1 and 2	5	SRR17327793			PRJNA315192	3.6.1.1.2	CipR.MSM5	strong	1.1.1.1.377	Yes	Yes	Present	Present	Present	Absent	Present	Present	Present	Present	Present	Present	Present	Present	Present	Present	Present	Present	Present	Present
20-001-0110	2019	224 SAMPLES MALE, 8 FEMALE	AVERAGE 40 [19 - 83]	Australia (NSW)	Unknown	N/A	N/A	N/A	2	5	PENDING			PRJNA613115	3.6.1.1.2	CipR.MSM5	strong			Yes	Present	Present	Present	Absent	Present	Present	Present	Present	Present	Present	Present	Present	Present	Present	Present	Present	Present	Present
SRR17398015	2021	M	16 - 60	England	Unknown	N/A	1.1.1.1.377.394.4202	Available	1 and 2	5	SRR17398015			PRJNA315192	3.6.1.1.2	CipR.MSM5	strong	1.1.1.1.377	Yes	Yes	Present	Absent	Absent	Absent	Present	Present	Present	Present	Present	Absent	Absent	Present	Present	Present	Present	Present	Present	Present
SRR17399985	2021	M	16 - 60	England	Unknown	N/A	1.1.1.1.377.394.4205	Available	1 and 2	5	SRR17399985			PRJNA315192	3.6.1.1.2	CipR.MSM5	strong	1.1.1.1.377	Yes	Yes	Present	Present	Present	Absent	Present	Present	Present	Present	Present	Present	Present	Present	Present	Present	Present	Present	Present	Present
SRR17399986	2021	M	16 - 60	England	Unknown	N/A	1.1.1.1.377.394.4204	Available	1 and 2	5	SRR17399986			PRJNA315192	3.6.1.1.2	CipR.MSM5	strong	1.1.1.1.377	Yes	Yes	Present	Present	Present	Absent	Present	Present	Present	Present	Present	Present	Present	Present	Present	Present	Present	Present	Present	Present
SRR17468137	2021	M	16 - 60	England	Unknown	N/A	1.1.1.1.377.394.4209	Available	1 and 2	5	SRR17468137			PRJNA315192	3.6.1.1.2	CipR.MSM5	strong	1.1.1.1.377	Yes	Yes	Present	Present	Present	Absent	Present	Present	Present	Present	Present	Present	Present	Present	Present	Present	Present	Present	Present	Present
SRR17468140	2021	M	16 - 60	England	Unknown	N/A	1.1.1.1.377.394.4213	Available	1 and 2	5	SRR17468140			PRJNA315192	3.6.1.1.2	CipR.MSM5	strong	1.1.1.1.377	Yes	Yes	Present	Present	Present	Absent	Present	Present	Present	Present	Present	Present	Present	Present	Present	Present	Present	Present	Present	Present
SRR17468141	2021	M	16 - 60	England	Unknown	N/A	1.1.1.1.377.394.4211	Available	1 and 2	5	SRR17468141			PRJNA315192	3.6.1.1.2	CipR.MSM5	strong	1.1.1.1.377	Yes	Yes	Present	Present	Present	Absent	Present	Present	Present	Present	Present	Present	Present	Present	Present	Present	Present	Present	Present	Present
SRR3530462	2016	M	16 - 60	England	No	N/A	1.1.1.1.377.394.617	Available	1 and 2	1	SRR3530462			PRJNA315192	3.6.1.1.2	CipR.MSM5	strong	1.1.1.1.377	Yes	Yes	Absent	Present	Present	Present	Absent	Absent	Absent	Absent	Absent	Present	Present	Present	Absent	Present	Absent	Present	Present	Present
SRR3530594	2016	M	16 - 60	England	Unknown	N/A	1.1.1.1.377.394.617	Available	1 and 2	1	SRR3530594			PRJNA315192	3.6.1.1.2	CipR.MSM5	strong	1.1.1.1.377	Yes	Yes	Absent	Present	Present	Present	Absent	Absent	Absent	Absent	Absent	Present	Present	Present	Absent	Present	Absent	Present	Present	Present
SRR3531237	2016	M	16 - 60	England	No	N/A	1.1.1.1.377.394.617	Available	1 and 2	1	SRR3531237			PRJNA315192	3.6.1.1.2	CipR.MSM5	strong	1.1.1.1.377	Yes	Yes	Absent	Present	Present	Absent	Absent	Absent	Absent	Absent	Absent	Present	Present	Present	Absent	Present	Absent	Present	Present	Present
SRR4897118	2016	M	16 - 60	England	No	N/A	1.1.1.1.377.691.934	Available	1 and 2	1	SRR4897118			PRJNA315192	3.6.1.1.2	CipR.MSM5	strong	1.1.1.1.377	Yes	Yes	Absent	Present	Present	Absent	Absent	Absent	Absent	Absent	Absent	Present	Present	Present	Absent	Present	Absent	Present	Present	Present
SRR4897212	2016	M	16 - 60	England	Unknown	N/A	1.1.1.1.377.394.1104	Available	1 and 2	1	SRR4897212			PRJNA315192	3.6.1.1.2	CipR.MSM5	strong	1.1.1.1.377	Yes	Yes	Present	Present	Present	Present	Absent	Absent	Present	Present	Present	Present	Present	Present	Present	Present	Present	Present	Present	Present
SRR7179961	2018	M	16 - 60	England	Unknown	N/A	1.1.1.1.377.394.2276	Available	1 and 2	3	SRR7179961			PRJNA315192	3.6.1.1.2	CipR.MSM5	strong	1.1.1.1.377	Yes	Yes	Present	Present	Present	Present	Absent	Absent	Present	Present	Present	Present	Present	Present	Present	Present	Present	Present	Present	Present
SRR7179964	2018	F	16 - 60	England	Unknown	N/A	1.1.1.1.377.394.2255	Available	1 and 2	1	SRR7179964			PRJNA315192	3.6.1.1.2	CipR.MSM5	strong	1.1.1.1.377	Yes	Yes	Present	Present	Present	Present	Absent	Absent	Present	Present	Present	Present	Present	Present	Present	Present	Present	Present	Present	Present
SRR7184255	2018	F	16 - 60	England	Unknown	N/A	1.1.1.1.377.394.2255	Available	1 and 2	1	SRR7184255			PRJNA315192	3.6.1.1.2	CipR.MSM5	strong	1.1.1.1.377	Yes	Yes	Present	Present	Present	Present	Absent	Absent	Present	Present	Present	Present	Present	Present	Present	Present	Present	Present	Present	Present
SRR7184257	2017	M	16 - 60	England	Unknown	N/A	1.1.1.1.377.394.2047	Available	1 and 2	3	SRR7184257			PRJNA315192	3.6.1.1.2	CipR.MSM5	strong	1.1.1.1.377	Yes	Yes	Present	Present	Present	Present	Absent	Absent	Present	Present	Present	Present	Present	Present	Present	Present	Present	Present	Present	Present
SRR7184434	2017	M	16 - 60	England	Unknown	N/A	1.1.1.1.377.394.2155	Available	1 and 2	3	SRR7184434			PRJNA315192	3.6.1.1.2	CipR.MSM5	strong	1.1.1.1.377	Yes	Yes	Present	Present	Present	Present	Absent	Absent	Present	Present	Present	Present	Present	Present	Present	Present	Present	Present	Present	Present
SRR7186890	2018	M	16 - 60	England	Unknown	N/A	1.1.1.1.377.394.2258	Available	1 and 2	3	SRR7186890			PRJNA315192	3.6.1.1.2	CipR.MSM5	strong	1.1.1.1.377	Yes	Yes	Present	Present	Present	Present	Absent	Absent	Present	Present	Present	Present	Present	Present	Present	Present	Present	Present	Present	Present
SRR7186900	2018	M	16 - 60	England	No	N/A	1.1.1.1.377.394.2024	Available	1 and 2	1	SRR7186900			PRJNA315192	3.6.1.1.2	CipR.MSM5	strong	1.1.1.1.377	Yes	Yes	Present	Present	Present	Present	Absent	Absent	Present	Present	Present	Present	Present	Present	Present	Present	Present	Present	Present	Present
SRR7186921	2017	M	16 - 60	England	Unknown	N/A	1.1.1.1.377.394.2024	Available	1 and 2	1	SRR7186921			PRJNA315192	3.6.1.1.2	CipR.MSM5	strong	1.1.1.1.377	Yes	Yes	Present	Present	Present	Present	Absent	Absent	Present	Present	Present	Present	Present	Present	Present	Present	Present	Present	Present	Present
SRR7186924	2018	M	16 - 60	England	Unknown	N/A	1.1.1.1.377.394.2263	Available	1 and 2	3	SRR7186924			PRJNA315192	3.6.1.1.2	CipR.MSM5	strong	1.1.1.1.377	Yes	Yes	Present	Present	Present	Present	Absent	Absent	Present	Present	Present	Present	Present	Present	Present	Present	Present	Present	Present	Present
SRR7187015	2018	M	16 - 60	England	Unknown	N/A	1.1.1.1.377.394.2230	Available	1 and 2	3	SRR7187015			PRJNA315192	3.6.1.1.2	CipR.MSM5	strong	1.1.1.1.377	Yes	Yes	Present	Present	Present	Present	Absent	Absent	Present	Present	Present	Present	Present	Present	Present	Present	Present	Present	Present	Present
SRR7187766	2018	M	16 - 60	England	Unknown	N/A	1.1.1.1.377.394.2195	Available	1 and 2	1	SRR7187766			PRJNA315192	3.6.1.1.2	CipR.MSM5	strong	1.1.1.1.377	Yes	Yes	Present	Present	Present	Present	Absent	Absent	Present	Present	Present	Present	Present	Present	Present	Present	Present	Present	Present	Present
SRR7187887	2018	M	16 - 60	England	Unknown	N/A	1.1.1.1.377.394.2155	Available	1 and 2	3	SRR7187887			PRJNA315192	3.6.1.1.2	CipR.MSM5	strong	1.1.1.1.377	Yes	Yes	Present	Present	Present	Present	Absent	Absent	Present	Present	Present	Present	Present	Present	Present	Present	Present	Present	Present	Present
SRR7187948	2018	M	16 - 60	England	No	N/A	1.1.1.1.377.394.2261	Available	1 and 2	1	SRR7187948			PRJNA315192	3.6.1.1.2	CipR.MSM5	strong	1.1.1.1.377	Yes	Yes	Present	Present	Present	Present	Absent	Absent	Absent	Present	Present	Present	Present	Present	Present	Present	Present	Present	Present	Present
SRR7204426	2017	M	16 - 60	England	Unknown	N/A	1.1.1.1.377.394.1885	Available	1 and 2	3	SRR7204426			PRJNA315192	3.6.1.1.2	CipR.MSM5	strong	1.1.1.1.377	Yes	Yes	Present	Present	Present	Present	Absent	Absent	Present	Present	Present	Present	Present	Present	Present	Present	Present	Present	Present	Present
SRR7208634	2018	M	16 - 60	England	Unknown	N/A	1.1.1.1.377.394.2305	Available	1 and 2	3	SRR7208634			PRJNA315192	3.6.1.1.2	CipR.MSM5	strong	1.1.1.1.377	Yes	Yes	Present	Present	Present	Present	Absent	Absent	Present	Present	Present	Present	Present	Present	Present	Present	Present	Present	Present	Present
SRR7215282	2018	M	16 - 60	England	Unknown	N/A	1.1.1.1.377.394.2249	Available	1 and 2	1	SRR7215282			PRJNA315192	3.6.1.1.2	CipR.MSM5	strong	1.1.1.1.377	Yes	Yes	Present	Present	Present	Present	Absent	Absent	Present	Present	Present	Present	Present	Present	Present	Present	Present	Present	Present	Present
SRR7215516	2017	M	16 - 60	England	No	N/A	1.1.1.1.377.394.1709	Available	1 and 2	3	SRR7215516			PRJNA315192	3.6.1.1.2	CipR.MSM5	strong	1.1.1.1.377	Yes	Yes	Present	Present	Present	Present	Absent	Absent	Present	Present	Present	Present	Present	Present	Present	Present	Present	Present	Present	Present
SRR7215917	2017	M	16 - 60	England	Unknown	N/A	1.1.1.1.377.394.2164	Available	1 and 2	3	SRR7215917			PRJNA315192	3.6.1.1.2	CipR.MSM5	strong	1.1.1.1.377	Yes	Yes	Present	Present	Present	Present	Absent	Absent	Present	Present	Present	Present	Present	Present	Present	Present	Present	Present	Present	Present
SRR7223111	2018	M	16 - 60	England	Unknown	N/A	1.1.1.1.377.394.2305	Available	1 and 2	3	SRR7223111			PRJNA315192	3.6.1.1.2	CipR.MSM5	strong	1.1.1.1.377	Yes	Yes	Present	Present	Present	Present	Absent	Absent	Present	Present	Present	Present	Present	Present	Present	Present	Present	Present	Present	Present
SRR7223114	2017	M	16 - 60	England	Unknown	N/A	1.1.1.1.377.394.2178	Available	1 and 2	3	SRR7223114			PRJNA315192	3.6.1.1.2	CipR.MSM5	strong	1.1.1.1.377	Yes	Yes	Present	Present	Present	Present	Absent	Absent	Present	Present	Present	Present	Present	Present	Present	Present	Present	Present	Present	Present
SRR7223141	2018	M	16 - 60	England	Unknown	N/A	1.1.1.1.377.394.2206	Available	1 and 2	3	SRR7223141			PRJNA315192	3.6.1.1.2	CipR.MSM5	strong	1.1.1.1.377	Yes	Yes	Present	Absent	Absent	Present	Absent	Absent	Present	Present	Present	Absent	Absent	Present	Present	Present	Present	Present	Present	Present
SRR7223145	2017	M	16 - 60	England	Yes	Unknown	1.1.1.1.377.394.2024	Available	1 and 2	1	SRR7223145			PRJNA315192	3.6.1.1.2	CipR.MSM5	strong	1.1.1.1.377	Yes	Yes	Present	Present	Present	Present	Absent	Absent	Present	Present	Present	Present	Present	Present	Present	Present	Present	Present	Present	Present
SRR7230383	2018	M	16 - 60	England	Unknown	N/A	1.1.1.1.377.394.2357	Available	1 and 2	3	SRR7230383			PRJNA315192	3.6.1.1.2	CipR.MSM5	strong	1.1.1.1.377	Yes	Yes	Present	Present	Present	Present	Absent	Absent	Present	Present	Present	Present	Present	Present	Present	Present	Present	Present	Present	Present
SRR7230386	2017	M	16 - 60	England	Unknown	N/A	1.1.1.1.377.394.2142	Available	1 and 2	1	SRR7230386			PRJNA315192	3.6.1.1.2	CipR.MSM5	strong	1.1.1.1.377	Yes	Yes	Present	Present	Present	Present	Absent	Absent	Present	Present	Present	Present	Present	Present	Present	Present	Present	Present	Present	Present
SRR7230678	2016	M	16 - 60	England	Unknown	N/A	1.1.1.1.377.394.1487	Available	1 and 2	1	SRR7230678			PRJNA315192	3.6.1.1.2	CipR.MSM5	strong	1.1.1.1.377	Yes	Yes	Present	Present	Present	Present	Absent	Absent	Present	Present	Present	Present	Present	Present	Present	Present	Present	Present	Present	Present
SRR7236583	2017	M	16 - 60	England	Unknown	N/A	1.1.1.1.377.394.2145	Available	1 and 2	3	SRR7236583			PRJNA315192	3.6.1.1.2	CipR.MSM5	strong	1.1.1.1.377	Yes	Yes	Present	Present	Present	Present	Absent	Absent	Present	Present	Present	Present	Present	Present	Present	Present	Present	Present	Present	Present
SRR7236617	2018	M	16 - 60	England	Unknown	N/A	1.1.1.1.377.394.2262	Available	1 and 2	1	SRR7236617			PRJNA315192	3.6.1.1.2	CipR.MSM5	strong	1.1.1.1.377	Yes	Yes	Present	Present	Present	Present	Absent	Absent	Present	Present	Present	Present	Present	Present	Present	Present	Present	Present	Present	Present
SRR7249687	2018	M	16 - 60	England	No	N/A	1.1.1.1.377.394.2155	Available	1 and 2	3	SRR7249687			PRJNA315192	3.6.1.1.2	CipR.MSM5	strong	1.1.1.1.377	Yes	Yes	Present	Present	Present	Present	Absent	Absent	Present	Present	Present	Present	Present	Present	Present	Present	Present	Present	Present	Present
SRR7250970	2018	M	16 - 60	England	Unknown	N/A	1.1.1.1.377.394.2236	Available	1 and 2	1	SRR7250970			PRJNA315192	3.6.1.1.2	CipR.MSM5	strong	1.1.1.1.377	Yes	Yes	Present	Present	Present	Present	Absent	Absent	Present	Present	Present	Present	Present	Present	Present	Present	Present	Present	Present	Present
SRR7250978	2018	M	16 - 60	England	Yes	Europe	1.1.1.1.377.394.2155	Available	1 and 2	3	SRR7250978			PRJNA315192	3.6.1.1.2	CipR.MSM5	strong	1.1.1.1.377	Yes	Yes	Present	Present	Present	Present	Absent	Absent	Present	Present	Present	Present	Present	Present	Present	Present	Present	Present	Present	Present
SRR7251024	2017	M	16 - 60	England	Unknown	N/A	1.1.1.1.377.394.2024	Available	1 and 2	1	SRR7251024			PRJNA315192	3.6.1.1.2	CipR.MSM5	strong	1.1.1.1.377	Yes	Yes	Present	Present	Present	Present	Absent	Absent	Present	Present	Present	Present	Present	Present	Present	Present	Present	Present	Present	Present
SRR7251030	2018	M	16 - 60	England	No	N/A	1.1.1.1.377.394.2261	Available	1 and 2	1	SRR7251030			PRJNA315192	3.6.1.1.2	CipR.MSM5	strong	1.1.1.1.377	Yes	Yes	Present	Present	Present	Present	Absent	Absent	Absent	Present	Present	Present	Present	Present	Present	Present	Present	Present	Present	Present
SRR7251430	2017	M	16 - 60	England	Unknown	N/A	1.1.1.1.377.394.1885	Available	1 and 2	3	SRR7251430			PRJNA315192	3.6.1.1.2	CipR.MSM5	strong	1.1.1.1.377	Yes	Yes	Present	Present	Present	Present	Absent	Absent	Present	Present	Present	Present	Present	Present	Present	Present	Present	Present	Present	Present
SRR7251433	2018	M	16 - 60	England	No	N/A	1.1.1.1.377.394.2155	Available	1 and 2	3	SRR7251433			PRJNA315192	3.6.1.1.2	CipR.MSM5	strong	1.1.1.1.377	Yes	Yes	Present	Present	Present	Present	Absent	Absent	Present	Present	Present	Present	Present	Present	Present	Present	Present	Present	Present	Present
SRR7265628	2017	M	16 - 60	England	Unknown	N/A	1.1.1.1.377.394.1969	Available	1 and 2	1	SRR7265628			PRJNA315192	3.6.1.1.2	CipR.MSM5	strong	1.1.1.1.377	Yes	Yes	Present	Present	Present	Present	Absent	Absent	Present	Present	Present	Present	Present	Present	Present	Present	Present	Present	Present	Present
SRR7265845	2017	M	16 - 60	England	No	N/A	1.1.1.1.377.394.2075	Available	1 and 2	3	SRR7265845			PRJNA315192	3.6.1.1.2	CipR.MSM5	strong	1.1.1.1.377	Yes	Yes	Present	Present	Present	Present	Absent	Absent	Present	Present	Present	Present	Present	Present	Present	Present	Present	Present	Present	Present
SRR7265932	2017	M	16 - 60	England	Unknown	N/A	1.1.1.1.377.394.1919	Available	1 and 2	3	SRR7265932			PRJNA315192	3.6.1.1.2	CipR.MSM5	strong	1.1.1.1.377	Yes	Yes	Present	Present	Present	Present	Absent	Absent	Present	Present	Present	Present	Present	Present	Present	Present	Present	Present	Present	Present
SRR7265958	2017	M	16 - 60	England	Unknown	N/A	1.1.1.1.377.394.2178	Available	1 and 2	3	SRR7265958			PRJNA315192	3.6.1.1.2	CipR.MSM5	strong	1.1.1.1.377	Yes	Yes	Present	Present	Present	Present	Absent	Absent	Present	Present	Present	Present	Present	Present	Present	Present	Present	Present	Present	Present
SRR7265959	2018	M	16 - 60	England	Unknown	N/A	1.1.1.1.377.394.2227	Available	1 and 2	3	SRR7265959			PRJNA315192	3.6.1.1.2	CipR.MSM5	strong	1.1.1.1.377	Yes	Yes	Present	Present	Present	Present	Absent	Absent	Present	Present	Present	Present	Present	Present	Present	Present	Present	Present	Present	Present
SRR7266381	2017	M	16 - 60	England	Unknown	N/A	1.1.1.1.377.394.2024	Available	1 and 2	1	SRR7266381			PRJNA315192	3.6.1.1.2	CipR.MSM5	strong	1.1.1.1.377	Yes	Yes	Present	Present	Present	Present	Absent	Absent	Present	Present	Present	Present	Present	Present	Present	Present	Present	Present	Present	Present
SRR7266790	2018	M	16 - 60	England	No	N/A	1.1.1.1.377.1602.2308	Available	1 and 2	3	SRR7266790			PRJNA315192	3.6.1.1.2	CipR.MSM5	strong	1.1.1.1.377	Yes	Yes	Present	Present	Present	Present	Absent	Absent	Present	Present	Present	Present	Present	Present	Present	Present	Present	Present	Present	Present
SRR7266791	2018	M	16 - 60	England	Unknown	N/A	1.1.1.1.377.394.2295	Available	1 and 2	3	SRR7266791			PRJNA315192	3.6.1.1.2	CipR.MSM5	strong	1.1.1.1.377	Yes	Yes	Present	Present	Present	Present	Absent	Absent	Present	Present	Present	Present	Present	Present	Present	Present	Present	Present	Present	Present
SRR7266831	2018	M	16 - 60	England	No	N/A	1.1.1.1.377.394.2155	Available	1 and 2	3	SRR7266831			PRJNA315192	3.6.1.1.2	CipR.MSM5	strong	1.1.1.1.377	Yes	Yes	Present	Absent	Absent	Present	Absent	Absent	Present	Present	Present	Absent	Absent	Present	Present	Present	Present	Present	Present	Present
SRR7274791	2018	M	16 - 60	England	No	N/A	1.1.1.1.377.394.2310	Available	1 and 2	3	SRR7274791			PRJNA315192	3.6.1.1.2	CipR.MSM5	strong	1.1.1.1.377	Yes	Yes	Present	Present	Present	Present	Absent	Absent	Present	Present	Present	Present	Present	Present	Present	Present	Present	Present	Present	Present
SRR7276909	2018	M	16 - 60	England	Unknown	N/A	1.1.1.1.377.394.2195	Available	1 and 2	1	SRR7276909			PRJNA315192	3.6.1.1.2	CipR.MSM5	strong	1.1.1.1.377	Yes	Yes	Present	Present	Present	Present	Absent	Absent	Present	Present	Present	Present	Present	Present	Present	Present	Present	Present	Present	Present
SRR7282605	2018	M	16 - 60	England	No	N/A	1.1.1.1.377.394.2261	Available	1 and 2	1	SRR7282605			PRJNA315192	3.6.1.1.2	CipR.MSM5	strong	1.1.1.1.377	Yes	Yes	Present	Present	Present	Present	Absent	Absent	Present	Present	Present	Present	Present	Present	Present	Present	Present	Present	Present	Present
SRR7282611	2017	M	16 - 60	England	Unknown	N/A	1.1.1.1.377.394.2118	Available	1 and 2	1	SRR7282611			PRJNA315192	3.6.1.1.2	CipR.MSM5	strong	1.1.1.1.377	Yes	Yes	Present	Present	Present	Present	Absent	Absent	Present	Present	Present	Present	Present	Present	Present	Present	Present	Present	Present	Present
SRR7283751	2018	M	16 - 60	England	Unknown	N/A	1.1.1.1.377.394.2189	Available	1 and 2	3	SRR7283751			PRJNA315192	3.6.1.1.2	CipR.MSM5	strong	1.1.1.1.377	Yes	Yes	Present	Present	Present	Present	Absent	Absent	Present	Present	Present	Present	Present	Present	Present	Present	Present	Present	Present	Present
SRR7285533	2017	M	16 - 60	England	Unknown	N/A	1.1.1.1.377.394.2024	Available	1 and 2	1	SRR7285533			PRJNA315192	3.6.1.1.2	CipR.MSM5	strong	1.1.1.1.377	Yes	Yes	Present	Present	Present	Present	Absent	Absent	Present	Present	Present	Present	Present	Present	Present	Present	Present	Present	Present	Present
SRR7285640	2018	M	16 - 60	England	No	N/A	1.1.1.1.377.394.2189	Available	1 and 2	3	SRR7285640			PRJNA315192	3.6.1.1.2	CipR.MSM5	strong	1.1.1.1.377	Yes	Yes	Present	Present	Present	Present	Absent	Absent	Present	Present	Present	Present	Present	Present	Present	Present	Present	Present	Present	Present
SRR7286408	2017	M	16 - 60	England	Unknown	N/A	1.1.1.1.377.394.2185	Available	1 and 2	1	SRR7286408			PRJNA315192	3.6.1.1.2	CipR.MSM5	strong	1.1.1.1.377	Yes	Yes	Present	Present	Present	Present	Absent	Absent	Present	Present	Present	Present	Present	Present	Present	Present	Present	Present	Present	Present
SRR7286531	2017	M	16 - 60	England	Unknown	N/A	1.1.1.1.377.394.1919	Available	1 and 2	3	SRR7286531			PRJNA315192	3.6.1.1.2	CipR.MSM5	strong	1.1.1.1.377	Yes	Yes	Present	Present	Present	Present	Absent	Absent	Present	Present	Present	Present	Present	Present	Present	Present	Present	Present	Present	Present
SRR7286564	2018	M	16 - 60	England	No	N/A	1.1.1.1.377.394.2155	Available	1 and 2	3	SRR7286564			PRJNA315192	3.6.1.1.2	CipR.MSM5	strong	1.1.1.1.377	Yes	Yes	Present	Present	Present	Present	Absent	Absent	Present	Present	Present	Present	Present	Present	Present	Present	Present	Present	Present	Present
SRR7286676	2017	M	16 - 60	England	Unknown	N/A	1.1.1.1.377.394.1919	Available	1 and 2	3	SRR7286676			PRJNA315192	3.6.1.1.2	CipR.MSM5	strong	1.1.1.1.377	Yes	Yes	Present	Present	Present	Present	Absent	Absent	Present	Present	Present	Present	Present	Present	Present	Present	Present	Present	Present	Present
SRR7290899	2018	F	16 - 60	England	Unknown	N/A	1.1.1.1.377.394.2395	Available	1 and 2	3	SRR7290899			PRJNA315192	3.6.1.1.2	CipR.MSM5	strong	1.1.1.1.377	Yes	Yes	Present	Present	Present	Present	Absent	Absent	Present	Present	Present	Present	Present	Present	Present	Present	Present	Present	Present	Present
SRR7290981	2018	M	16 - 60	England	Unknown	N/A	1.1.1.1.377.394.2262	Available	1 and 2	1	SRR7290981			PRJNA315192	3.6.1.1.2	CipR.MSM5	strong	1.1.1.1.377	Yes	Yes	Present	Present	Present	Present	Absent	Absent	Present	Present	Present	Present	Present	Present	Present	Present	Present	Present	Present	Present
SRR7290995	2018	M	16 - 60	England	No	N/A	1.1.1.1.377.394.2390	Available	1 and 2	3	SRR7290995			PRJNA315192	3.6.1.1.2	CipR.MSM5	strong	1.1.1.1.377	Yes	Yes	Present	Present	Present	Present	Absent	Absent	Present	Present	Present	Present	Present	Present	Present	Present	Present	Present	Present	Present
SRR7291008	2018	M	16 - 60	England	Unknown	N/A	1.1.1.1.377.394.2155	Available	1 and 2	3	SRR7291008			PRJNA315192	3.6.1.1.2	CipR.MSM5	strong	1.1.1.1.377	Yes	Yes	Present	Present	Present	Present	Absent	Absent	Present	Present	Present	Present	Present	Present	Present	Present	Present	Present	Present	Present
SRR7291034	2018	M	16 - 60	England	Yes	Europe	1.1.1.1.377.394.2382	Available	1 and 2	3	SRR7291034			PRJNA315192	3.6.1.1.2	CipR.MSM5	strong	1.1.1.1.377	Yes	Yes	Present	Present	Present	Present	Absent	Absent	Present	Present	Present	Present	Present	Present	Present	Present	Present	Present	Present	Present
SRR7291539	2017	M	16 - 60	England	Unknown	N/A	1.1.1.1.377.394.2160	Available	1 and 2	1	SRR7291539			PRJNA315192	3.6.1.1.2	CipR.MSM5	strong	1.1.1.1.377	Yes	Yes	Present	Present	Present	Present	Absent	Absent	Present	Present	Present	Present	Present	Present	Present	Present	Present	Present	Present	Present
SRR7291610	2018	M	16 - 60	England	Unknown	N/A	1.1.1.1.377.1602.2308	Available	1 and 2	3	SRR7291610			PRJNA315192	3.6.1.1.2	CipR.MSM5	strong	1.1.1.1.377	Yes	Yes	Present	Present	Present	Present	Absent	Absent	Present	Present	Present	Present	Present	Present	Present	Present	Present	Present	Present	Present
SRR7291639	2018	M	16 - 60	England	Unknown	N/A	1.1.1.1.377.394.2155	Available	1 and 2	3	SRR7291639			PRJNA315192	3.6.1.1.2	CipR.MSM5	strong	1.1.1.1.377	Yes	Yes	Present	Present	Present	Present	Absent	Absent	Present	Present	Present	Present	Present	Present	Present	Present	Present	Present	Present	Present
SRR7291917	2018	M	16 - 60	England	No	N/A	1.1.1.1.377.394.2374	Available	1 and 2	3	SRR7291917			PRJNA315192	3.6.1.1.2	CipR.MSM5	strong	1.1.1.1.377	Yes	Yes	Present	Present	Present	Present	Absent	Absent	Present	Present	Present	Present	Present	Present	Present	Present	Present	Present	Present	Present
SRR7291933	2018	M	16 - 60	England	Unknown	N/A	1.1.1.1.377.394.2374	Available	1 and 2	3	SRR7291933			PRJNA315192	3.6.1.1.2	CipR.MSM5	strong	1.1.1.1.377	Yes	Yes	Present	Present	Present	Present	Absent	Absent	Present	Present	Present	Present	Present	Present	Present	Present	Present	Present	Present	Present
SRR7358012	2018	M	16 - 60	England	Unknown	N/A	1.1.1.1.377.394.2401	Available	1 and 2	1	SRR7358012			PRJNA315192	3.6.1.1.2	CipR.MSM5	strong	1.1.1.1.377	Yes	Yes	Present	Present	Present	Present	Absent	Absent	Present	Present	Present	Present	Present	Present	Present	Present	Present	Present	Present	Present
SRR7358035	2018	M	16 - 60	England	Unknown	N/A	1.1.1.1.377.394.2259	Available	1 and 2	3	SRR7358035			PRJNA315192	3.6.1.1.2	CipR.MSM5	strong	1.1.1.1.377	Yes	Yes	Present	Present	Present	Present	Absent	Absent	Present	Present	Present	Present	Present	Present	Present	Present	Present	Present	Present	Present
SRR7358270	2018	M	16 - 60	England	No	N/A	1.1.1.1.377.394.2379	Available	1 and 2	1	SRR7358270			PRJNA315192	3.6.1.1.2	CipR.MSM5	strong	1.1.1.1.377	Yes	Yes	Present	Present	Present	Present	Absent	Absent	Present	Present	Present	Present	Present	Present	Present	Present	Present	Present	Present	Present
SRR7367372	2018	M	> 60	England	Unknown	N/A	1.1.1.1.377.394.2256	Available	1 and 2	3	SRR7367372			PRJNA315192	3.6.1.1.2	CipR.MSM5	strong	1.1.1.1.377	Yes	Yes	Present	Present	Present	Present	Absent	Absent	Present	Present	Present	Present	Present	Present	Present	Present	Present	Present	Present	Present
SRR7367390	2018	M	16 - 60	England	Unknown	N/A	1.1.1.1.377.394.2155	Available	1 and 2	3	SRR7367390			PRJNA315192	3.6.1.1.2	CipR.MSM5	strong	1.1.1.1.377	Yes	Yes	Present	Present	Present	Present	Absent	Absent	Present	Present	Present	Present	Present	Present	Present	Present	Present	Present	Present	Present
SRR7367533	2018	M	16 - 60	England	Unknown	N/A	1.1.1.1.377.394.2155	Available	1 and 2	3	SRR7367533			PRJNA315192	3.6.1.1.2	CipR.MSM5	strong	1.1.1.1.377	Yes	Yes	Present	Present	Present	Present	Absent	Absent	Present	Present	Present	Present	Present	Present	Present	Present	Present	Present	Present	Present
SRR7368874	2018	M	16 - 60	England	No	N/A	1.1.1.1.377.394.2178	Available	1 and 2	3	SRR7368874			PRJNA315192	3.6.1.1.2	CipR.MSM5	strong	1.1.1.1.377	Yes	Yes	Present	Present	Present	Present	Absent	Absent	Present	Present	Present	Present	Present	Present	Present	Present	Present	Present	Present	Present
SRR7401640	2018	M	16 - 60	England	No	N/A	1.1.1.1.377.394.2024	Available	1 and 2	1	SRR7401640			PRJNA315192	3.6.1.1.2	CipR.MSM5	strong	1.1.1.1.377	Yes	Yes	Present	Present	Present	Present	Absent	Absent	Present	Present	Present	Present	Present	Present	Present	Present	Present	Present	Present	Present
SRR7401710	2018	M	16 - 60	England	Unknown	N/A	1.1.1.1.377.394.2203	Available	1 and 2	3	SRR7401710			PRJNA315192	3.6.1.1.2	CipR.MSM5	strong	1.1.1.1.377	Yes	Yes	Present	Present	Present	Absent	Absent	Absent	Present	Present	Present	Present	Present	Present	Present	Present	Present	Present	Present	Present
SRR7407914	2018	M	16 - 60	England	Unknown	N/A	1.1.1.1.377.394.2155	Available	1 and 2	3	SRR7407914			PRJNA315192	3.6.1.1.2	CipR.MSM5	strong	1.1.1.1.377	Yes	Yes	Present	Present	Present	Present	Absent	Absent	Present	Present	Present	Present	Present	Present	Present	Present	Present	Present	Present	Present
SRR7407985	2018	M	16 - 60	England	No	N/A	1.1.1.1.377.394.2310	Available	1 and 2	3	SRR7407985			PRJNA315192	3.6.1.1.2	CipR.MSM5	strong	1.1.1.1.377	Yes	Yes	Present	Present	Present	Present	Absent	Absent	Present	Present	Present	Present	Present	Present	Present	Present	Present	Present	Present	Present
SRR7416064	2018	M	16 - 60	England	Yes	Europe	1.1.1.1.377.394.2407	Available	1 and 2	1	SRR7416064			PRJNA315192	3.6.1.1.2	CipR.MSM5	strong	1.1.1.1.377	Yes	Yes	Present	Present	Present	Present	Absent	Absent	Present	Present	Present	Present	Present	Present	Present	Present	Present	Present	Present	Present
SRR7439067	2018	M	16 - 60	England	Unknown	N/A	1.1.1.1.377.394.2414	Available	1 and 2	3	SRR7439067			PRJNA315192	3.6.1.1.2	CipR.MSM5	strong	1.1.1.1.377	Yes	Yes	Present	Present	Present	Present	Absent	Absent	Present	Present	Present	Present	Present	Present	Present	Present	Present	Present	Present	Present
SRR7439071	2018	M	16 - 60	England	Unknown	N/A	1.1.1.1.377.394.2418	Available	1 and 2	3	SRR7439071			PRJNA315192	3.6.1.1.2	CipR.MSM5	strong	1.1.1.1.377	Yes	Yes	Present	Present	Present	Present	Absent	Absent	Present	Present	Present	Present	Present	Present	Present	Present	Present	Present	Present	Present
SRR7456553	2018	M	16 - 60	England	No	N/A	1.1.1.1.377.394.2426	Available	1 and 2	3	SRR7456553			PRJNA315192	3.6.1.1.2	CipR.MSM5	strong	1.1.1.1.377	Yes	Yes	Present	Present	Present	Present	Absent	Absent	Present	Present	Present	Present	Present	Present	Present	Present	Present	Present	Present	Present
SRR7456560	2018	M	16 - 60	England	Unknown	N/A	1.1.1.1.377.394.2262	Available	1 and 2	1	SRR7456560			PRJNA315192	3.6.1.1.2	CipR.MSM5	strong	1.1.1.1.377	Yes	Yes	Present	Present	Present	Present	Absent	Absent	Present	Present	Present	Present	Present	Present	Present	Present	Present	Present	Present	Present
SRR7456561	2018	M	16 - 60	England	No	N/A	1.1.1.1.377.394.2024	Available	1 and 2	1	SRR7456561			PRJNA315192	3.6.1.1.2	CipR.MSM5	strong	1.1.1.1.377	Yes	Yes	Present	Present	Present	Present	Absent	Absent	Present	Present	Present	Present	Present	Present	Present	Present	Present	Present	Present	Present
SRR7456567	2018	M	16 - 60	England	Unknown	N/A	1.1.1.1.377.394.2420	Available	1 and 2	3	SRR7456567			PRJNA315192	3.6.1.1.2	CipR.MSM5	strong	1.1.1.1.377	Yes	Yes	Present	Present	Present	Present	Absent	Absent	Present	Present	Present	Present	Present	Present	Present	Present	Present	Present	Present	Present
SRR7474132	2018	M	16 - 60	England	Unknown	N/A	1.1.1.1.377.394.2262	Available	1 and 2	1	SRR7474132			PRJNA315192	3.6.1.1.2	CipR.MSM5	strong	1.1.1.1.377	Yes	Yes	Present	Present	Present	Present	Absent	Absent	Present	Present	Present	Present	Present	Present	Present	Present	Present	Present	Present	Present
SRR7495421	2018	M	16 - 60	England	Unknown	N/A	1.1.1.1.377.394.2305	Available	1 and 2	3	SRR7495421			PRJNA315192	3.6.1.1.2	CipR.MSM5	strong	1.1.1.1.377	Yes	Yes	Present	Present	Present	Present	Absent	Absent	Present	Present	Present	Present	Present	Present	Present	Present	Present	Present	Present	Present
SRR7495422	2018	M	16 - 60	England	Unknown	N/A	1.1.1.1.377.394.2155	Available	1 and 2	3	SRR7495422			PRJNA315192	3.6.1.1.2	CipR.MSM5	strong	1.1.1.1.377	Yes	Yes	Present	Absent	Absent	Present	Absent	Absent	Present	Present	Present	Absent	Absent	Present	Present	Present	Present	Present	Present	Present
SRR7495423	2018	M	16 - 60	England	No	N/A	1.1.1.1.377.394.2381	Available	1 and 2	1	SRR7495423			PRJNA315192	3.6.1.1.2	CipR.MSM5	strong	1.1.1.1.377	Yes	Yes	Present	Present	Present	Present	Absent	Absent	Present	Present	Present	Present	Present	Present	Present	Present	Present	Present	Present	Present
SRR7500939	2018	M	16 - 60	England	Unknown	N/A	1.1.1.1.377.394.2440	Available	1 and 2	4	SRR7500939			PRJNA315192	3.6.1.1.2	CipR.MSM5	strong	1.1.1.1.377	Yes	Yes	Present	Present	Present	Present	Absent	Absent	Present	Present	Present	Present	Present	Present	Present	Present	Present	Present	Present	Present
SRR7500992	2018	M	16 - 60	England	Unknown	N/A	1.1.1.1.377.394.2436	Available	1 and 2	1	SRR7500992			PRJNA315192	3.6.1.1.2	CipR.MSM5	strong	1.1.1.1.377	Yes	Yes	Present	Present	Present	Present	Absent	Absent	Present	Present	Present	Present	Present	Present	Present	Present	Present	Present	Present	Present
SRR7522842	2018	M	16 - 60	England	No	N/A	1.1.1.1.377.394.2262	Available	1 and 2	1	SRR7522842			PRJNA315192	3.6.1.1.2	CipR.MSM5	strong	1.1.1.1.377	Yes	Yes	Present	Present	Present	Present	Absent	Absent	Present	Present	Present	Present	Present	Present	Present	Present	Present	Present	Present	Present
SRR7522847	2018	M	16 - 60	England	Unknown	N/A	1.1.1.1.377.394.2445	Available	1 and 2	4	SRR7522847			PRJNA315192	3.6.1.1.2	CipR.MSM5	strong	1.1.1.1.377	Yes	Yes	Present	Present	Present	Present	Absent	Absent	Present	Present	Present	Present	Present	Present	Present	Present	Present	Present	Present	Present
SRR7522850	2018	M	16 - 60	England	No	N/A	1.1.1.1.377.394.2381	Available	1 and 2	1	SRR7522850			PRJNA315192	3.6.1.1.2	CipR.MSM5	strong	1.1.1.1.377	Yes	Yes	Present	Present	Present	Present	Absent	Absent	Present	Present	Present	Present	Present	Present	Present	Present	Present	Present	Present	Present
SRR7527628	2018	M	16 - 60	England	Unknown	N/A	1.1.1.1.377.394.2453	Available	1 and 2	4	SRR7527628			PRJNA315192	3.6.1.1.2	CipR.MSM5	strong	1.1.1.1.377	Yes	Yes	Present	Present	Present	Present	Absent	Absent	Present	Present	Present	Present	Present	Present	Present	Present	Present	Present	Present	Present
SRR7527631	2018	F	16 - 60	England	Unknown	N/A	1.1.1.1.377.394.2155	Available	1 and 2	3	SRR7527631			PRJNA315192	3.6.1.1.2	CipR.MSM5	strong	1.1.1.1.377	Yes	Yes	Present	Absent	Absent	Present	Absent	Absent	Present	Present	Present	Absent	Absent	Present	Present	Present	Present	Present	Present	Present
SRR7527635	2018	M	16 - 60	England	Unknown	N/A	1.1.1.1.377.394.2452	Available	1 and 2	3	SRR7527635			PRJNA315192	3.6.1.1.2	CipR.MSM5	strong	1.1.1.1.377	Yes	Yes	Present	Present	Present	Present	Absent	Absent	Present	Present	Present	Present	Present	Present	Present	Present	Present	Present	Present	Present
SRR7588686	2018	M	16 - 60	England	No	N/A	1.1.1.1.377.394.2641	Available	1 and 2	3	SRR7588686			PRJNA315192	3.6.1.1.2	CipR.MSM5	strong	1.1.1.1.377	Yes	Yes	Present	Absent	Absent	Present	Absent	Absent	Present	Present	Present	Absent	Absent	Present	Present	Present	Present	Present	Present	Present
SRR7588721	2018	M	16 - 60	England	No	N/A	1.1.1.1.377.394.2627	Available	1 and 2	3	SRR7588721			PRJNA315192	3.6.1.1.2	CipR.MSM5	strong	1.1.1.1.377	Yes	Yes	Present	Present	Present	Present	Absent	Absent	Present	Present	Present	Present	Present	Present	Present	Present	Present	Present	Present	Present
SRR7588723	2018	M	16 - 60	England	Unknown	N/A	1.1.1.1.377.394.2627	Available	1 and 2	3	SRR7588723			PRJNA315192	3.6.1.1.2	CipR.MSM5	strong	1.1.1.1.377	Yes	Yes	Present	Present	Present	Present	Absent	Absent	Present	Present	Present	Present	Present	Present	Present	Present	Present	Present	Present	Present
SRR7826920	2018	M	16 - 60	England	Unknown	N/A	1.1.1.1.377.394.2678	Available	1 and 2	3	SRR7826920			PRJNA315192	3.6.1.1.2	CipR.MSM5	strong	1.1.1.1.377	Yes	Yes	Present	Present	Present	Present	Absent	Absent	Present	Present	Present	Present	Present	Present	Present	Present	Present	Present	Present	Present
SRR7826933	2018	M	16 - 60	England	Unknown	N/A	1.1.1.1.377.394.2773	Available	1 and 2	1	SRR7826933			PRJNA315192	3.6.1.1.2	CipR.MSM5	strong	1.1.1.1.377	Yes	Yes	Present	Present	Present	Present	Absent	Absent	Present	Present	Present	Present	Present	Present	Present	Present	Present	Present	Present	Present
SRR7826946	2018	F	16 - 60	England	Unknown	N/A	1.1.1.1.377.394.2155	Available	1 and 2	3	SRR7826946			PRJNA315192	3.6.1.1.2	CipR.MSM5	strong	1.1.1.1.377	Yes	Yes	Present	Present	Present	Present	Absent	Absent	Present	Present	Present	Present	Present	Present	Present	Present	Present	Present	Present	Present
SRR7827037	2018	M	16 - 60	England	No	N/A	1.1.1.1.377.394.2722	Available	1 and 2	4	SRR7827037			PRJNA315192	3.6.1.1.2	CipR.MSM5	strong	1.1.1.1.377	Yes	Yes	Present	Present	Present	Present	Absent	Absent	Present	Present	Present	Present	Present	Present	Present	Present	Present	Present	Present	Present
SRR7827056	2018	M	16 - 60	England	Unknown	N/A	1.1.1.1.377.394.2155	Available	1 and 2	3	SRR7827056			PRJNA315192	3.6.1.1.2	CipR.MSM5	strong	1.1.1.1.377	Yes	Yes	Present	Present	Present	Present	Absent	Absent	Present	Present	Present	Present	Present	Present	Present	Present	Present	Present	Present	Present
SRR7827993	2018	M	16 - 60	England	Unknown	N/A	1.1.1.1.377.394.2681	Available	1 and 2	1	SRR7827993			PRJNA315192	3.6.1.1.2	CipR.MSM5	strong	1.1.1.1.377	Yes	Yes	Present	Present	Present	Present	Absent	Absent	Present	Present	Present	Present	Present	Present	Present	Present	Present	Present	Present	Present
SRR7833091	2018	M	16 - 60	England	No	N/A	1.1.1.1.377.394.2714	Available	1 and 2	3	SRR7833091			PRJNA315192	3.6.1.1.2	CipR.MSM5	strong	1.1.1.1.377	Yes	Yes	Present	Absent	Absent	Present	Absent	Absent	Present	Present	Present	Absent	Absent	Present	Present	Present	Present	Present	Present	Present
SRR7833102	2018	M	16 - 60	England	Unknown	N/A	1.1.1.1.377.394.2440	Available	1 and 2	4	SRR7833102			PRJNA315192	3.6.1.1.2	CipR.MSM5	strong	1.1.1.1.377	Yes	Yes	Present	Present	Present	Present	Absent	Absent	Present	Present	Present	Present	Present	Present	Present	Present	Present	Present	Present	Present
SRR7833103	2018	M	16 - 60	England	Unknown	N/A	1.1.1.1.377.394.2782	Available	1 and 2	4	SRR7833103			PRJNA315192	3.6.1.1.2	CipR.MSM5	strong	1.1.1.1.377	Yes	Yes	Present	Present	Present	Present	Absent	Absent	Present	Present	Present	Present	Present	Present	Present	Present	Present	Present	Present	Present
SRR7836288	2018	M	16 - 60	England	Unknown	N/A	1.1.1.1.377.1602.2308	Available	1 and 2	3	SRR7836288			PRJNA315192	3.6.1.1.2	CipR.MSM5	strong	1.1.1.1.377	Yes	Yes	Present	Absent	Absent	Present	Absent	Absent	Present	Present	Present	Absent	Absent	Present	Present	Present	Present	Present	Present	Present
SRR7839304	2018	M	16 - 60	England	Unknown	N/A	1.1.1.1.377.394.2733	Available	1 and 2	1	SRR7839304			PRJNA315192	3.6.1.1.2	CipR.MSM5	strong	1.1.1.1.377	Yes	Yes	Present	Absent	Absent	Present	Absent	Absent	Present	Present	Present	Absent	Absent	Present	Present	Present	Present	Present	Present	Present
SRR7839308	2018	M	> 60	England	Unknown	N/A	1.1.1.1.377.394.2440	Available	1 and 2	4	SRR7839308			PRJNA315192	3.6.1.1.2	CipR.MSM5	strong	1.1.1.1.377	Yes	Yes	Present	Present	Present	Present	Absent	Absent	Present	Present	Present	Present	Present	Present	Present	Present	Present	Present	Present	Present
SRR7839319	2018	M	16 - 60	England	Unknown	N/A	1.1.1.1.377.394.2440	Available	1 and 2	4	SRR7839319			PRJNA315192	3.6.1.1.2	CipR.MSM5	strong	1.1.1.1.377	Yes	Yes	Present	Present	Present	Present	Absent	Absent	Present	Present	Present	Present	Present	Present	Present	Present	Present	Present	Present	Present
SRR7839347	2018	M	16 - 60	England	Unknown	N/A	1.1.1.1.377.394.2734	Available	1 and 2	4	SRR7839347			PRJNA315192	3.6.1.1.2	CipR.MSM5	strong	1.1.1.1.377	Yes	Yes	Present	Present	Present	Present	Absent	Absent	Present	Present	Present	Present	Present	Present	Present	Present	Present	Present	Present	Present
SRR7841123	2018	M	16 - 60	England	Unknown	N/A	1.1.1.1.377.394.2760	Available	1 and 2	3	SRR7841123			PRJNA315192	3.6.1.1.2	CipR.MSM5	strong	1.1.1.1.377	Yes	Yes	Present	Present	Present	Present	Absent	Absent	Present	Present	Present	Present	Present	Present	Present	Present	Present	Present	Present	Present
SRR7842097	2018	M	16 - 60	England	Unknown	N/A	1.1.1.1.377.394.2420	Available	1 and 2	3	SRR7842097			PRJNA315192	3.6.1.1.2	CipR.MSM5	strong	1.1.1.1.377	Yes	Yes	Present	Present	Present	Present	Absent	Absent	Present	Present	Present	Present	Present	Present	Present	Present	Present	Present	Present	Present
SRR7842106	2018	M	16 - 60	England	Unknown	N/A	1.1.1.1.377.394.2155	Available	1 and 2	3	SRR7842106			PRJNA315192	3.6.1.1.2	CipR.MSM5	strong	1.1.1.1.377	Yes	Yes	Present	Absent	Absent	Present	Absent	Absent	Present	Present	Present	Absent	Absent	Present	Present	Present	Present	Present	Present	Present
SRR7842119	2018	M	16 - 60	England	Unknown	N/A	1.1.1.1.377.394.2710	Available	1 and 2	1	SRR7842119			PRJNA315192	3.6.1.1.2	CipR.MSM5	strong	1.1.1.1.377	Yes	Yes	Present	Absent	Absent	Present	Absent	Absent	Present	Present	Present	Absent	Absent	Present	Present	Present	Present	Present	Present	Present
SRR7842125	2018	M	16 - 60	England	Unknown	N/A	1.1.1.1.377.394.2680	Available	1 and 2	3	SRR7842125			PRJNA315192	3.6.1.1.2	CipR.MSM5	strong	1.1.1.1.377	Yes	Yes	Present	Present	Present	Present	Absent	Absent	Present	Present	Present	Present	Present	Present	Present	Present	Present	Present	Present	Present
SRR7842126	2018	F	16 - 60	England	No	N/A	1.1.1.1.377.394.2155	Available	1 and 2	3	SRR7842126			PRJNA315192	3.6.1.1.2	CipR.MSM5	strong	1.1.1.1.377	Yes	Yes	Present	Present	Present	Present	Absent	Absent	Present	Present	Present	Present	Present	Present	Present	Present	Present	Present	Present	Present
SRR7842131	2018	M	16 - 60	England	Unknown	N/A	1.1.1.1.377.394.2440	Available	1 and 2	4	SRR7842131			PRJNA315192	3.6.1.1.2	CipR.MSM5	strong	1.1.1.1.377	Yes	Yes	Present	Present	Present	Present	Absent	Absent	Present	Present	Present	Present	Present	Present	Present	Present	Present	Present	Present	Present
SRR7842136	2018	M	16 - 60	England	Unknown	N/A	1.1.1.1.377.394.2732	Available	1 and 2	3	SRR7842136			PRJNA315192	3.6.1.1.2	CipR.MSM5	strong	1.1.1.1.377	Yes	Yes	Present	Present	Present	Present	Absent	Absent	Present	Present	Present	Present	Present	Present	Present	Present	Present	Present	Present	Present
SRR7842144	2018	M	16 - 60	England	Unknown	N/A	1.1.1.1.377.394.2262	Available	1 and 2	1	SRR7842144			PRJNA315192	3.6.1.1.2	CipR.MSM5	strong	1.1.1.1.377	Yes	Yes	Present	Present	Present	Present	Absent	Absent	Present	Present	Present	Present	Present	Present	Present	Present	Present	Present	Present	Present
SRR7842168	2018	M	16 - 60	England	Unknown	N/A	1.1.1.1.377.1602.2743	Available	1 and 2	3	SRR7842168			PRJNA315192	3.6.1.1.2	CipR.MSM5	strong	1.1.1.1.377	Yes	Yes	Present	Present	Present	Present	Absent	Absent	Present	Present	Present	Present	Present	Present	Present	Present	Present	Present	Present	Present
SRR7849994	2018	M	16 - 60	England	Unknown	N/A	1.1.1.1.377.394.2708	Available	1 and 2	4	SRR7849994			PRJNA315192	3.6.1.1.2	CipR.MSM5	strong	1.1.1.1.377	Yes	Yes	Present	Present	Present	Present	Absent	Absent	Present	Present	Present	Present	Present	Present	Present	Present	Present	Present	Present	Present
SRR7850008	2018	M	16 - 60	England	Unknown	N/A	1.1.1.1.377.394.2155	Available	1 and 2	3	SRR7850008			PRJNA315192	3.6.1.1.2	CipR.MSM5	strong	1.1.1.1.377	Yes	Yes	Present	Present	Present	Present	Absent	Absent	Present	Present	Present	Present	Present	Present	Present	Present	Present	Present	Present	Present
SRR7850028	2018	M	16 - 60	England	Unknown	N/A	1.1.1.1.377.394.2024	Available	1 and 2	1	SRR7850028			PRJNA315192	3.6.1.1.2	CipR.MSM5	strong	1.1.1.1.377	Yes	Yes	Present	Present	Present	Present	Absent	Absent	Present	Present	Present	Present	Present	Present	Present	Present	Present	Present	Present	Present
SRR7850035	2018	M	16 - 60	England	Unknown	N/A	1.1.1.1.377.394.2672	Available	1 and 2	1	SRR7850035			PRJNA315192	3.6.1.1.2	CipR.MSM5	strong	1.1.1.1.377	Yes	Yes	Present	Present	Present	Present	Absent	Absent	Present	Present	Present	Present	Present	Present	Present	Present	Present	Present	Present	Present
SRR7850051	2018	M	16 - 60	England	Unknown	N/A	1.1.1.1.377.394.2155	Available	1 and 2	3	SRR7850051			PRJNA315192	3.6.1.1.2	CipR.MSM5	strong	1.1.1.1.377	Yes	Yes	Present	Present	Present	Present	Absent	Absent	Present	Present	Present	Present	Present	Present	Present	Present	Present	Present	Present	Present
SRR7850055	2018	M	16 - 60	England	Unknown	N/A	1.1.1.1.377.394.2720	Available	1 and 2	1	SRR7850055			PRJNA315192	3.6.1.1.2	CipR.MSM5	strong	1.1.1.1.377	Yes	Yes	Present	Present	Present	Present	Absent	Absent	Present	Present	Present	Present	Present	Present	Present	Present	Present	Present	Present	Present
SRR7850066	2018	M	16 - 60	England	Unknown	N/A	1.1.1.1.377.394.2426	Available	1 and 2	3	SRR7850066			PRJNA315192	3.6.1.1.2	CipR.MSM5	strong	1.1.1.1.377	Yes	Yes	Present	Present	Present	Present	Absent	Absent	Present	Present	Present	Present	Present	Present	Present	Present	Present	Present	Present	Present
SRR7850134	2018	M	16 - 60	England	Yes	Europe	1.1.1.1.377.394.2679	Available	1 and 2	3	SRR7850134			PRJNA315192	3.6.1.1.2	CipR.MSM5	strong	1.1.1.1.377	Yes	Yes	Present	Present	Present	Absent	Absent	Absent	Present	Present	Present	Present	Present	Present	Present	Present	Present	Present	Present	Present
SRR7850136	2018	M	16 - 60	England	Unknown	N/A	1.1.1.1.377.394.2727	Available	1 and 2	3	SRR7850136			PRJNA315192	3.6.1.1.2	CipR.MSM5	strong	1.1.1.1.377	Yes	Yes	Present	Present	Present	Present	Absent	Absent	Present	Present	Present	Present	Present	Present	Present	Present	Present	Present	Present	Present
SRR7850161	2018	M	16 - 60	England	No	N/A	1.1.1.1.377.394.2681	Available	1 and 2	1	SRR7850161			PRJNA315192	3.6.1.1.2	CipR.MSM5	strong	1.1.1.1.377	Yes	Yes	Present	Present	Present	Present	Absent	Absent	Present	Present	Present	Present	Present	Present	Present	Present	Present	Present	Present	Present
SRR7850205	2018	M	16 - 60	England	Yes	Europe	1.1.1.1.377.394.2681	Available	1 and 2	1	SRR7850205			PRJNA315192	3.6.1.1.2	CipR.MSM5	strong	1.1.1.1.377	Yes	Yes	Present	Present	Present	Present	Absent	Absent	Present	Present	Present	Present	Present	Present	Present	Present	Present	Present	Present	Present
SRR7866070	2018	M	> 60	England	Unknown	N/A	1.1.1.1.377.394.2681	Available	1 and 2	1	SRR7866070			PRJNA315192	3.6.1.1.2	CipR.MSM5	strong	1.1.1.1.377	Yes	Yes	Present	Present	Present	Present	Absent	Absent	Present	Present	Present	Present	Present	Present	Present	Present	Present	Present	Present	Present
SRR7866091	2018	M	16 - 60	England	Unknown	N/A	1.1.1.1.377.394.2680	Available	1 and 2	3	SRR7866091			PRJNA315192	3.6.1.1.2	CipR.MSM5	strong	1.1.1.1.377	Yes	Yes	Present	Present	Present	Present	Absent	Absent	Present	Present	Present	Present	Present	Present	Present	Present	Present	Present	Present	Present
SRR7866099	2018	M	16 - 60	England	Unknown	N/A	1.1.1.1.377.394.2155	Available	1 and 2	3	SRR7866099			PRJNA315192	3.6.1.1.2	CipR.MSM5	strong	1.1.1.1.377	Yes	Yes	Present	Present	Present	Present	Absent	Absent	Present	Present	Present	Present	Present	Present	Present	Present	Present	Present	Present	Present
SRR7866100	2018	F	< 16	England	Unknown	N/A	1.1.1.1.377.394.2440	Available	1 and 2	4	SRR7866100			PRJNA315192	3.6.1.1.2	CipR.MSM5	strong	1.1.1.1.377	Yes	Yes	Present	Present	Present	Present	Absent	Absent	Present	Present	Present	Present	Present	Present	Present	Present	Present	Present	Present	Present
SRR7866114	2018	M	16 - 60	England	Unknown	N/A	1.1.1.1.377.394.2792	Available	1 and 2	1	SRR7866114			PRJNA315192	3.6.1.1.2	CipR.MSM5	strong	1.1.1.1.377	Yes	Yes	Present	Present	Present	Present	Absent	Absent	Present	Present	Present	Present	Present	Present	Present	Present	Present	Present	Present	Present
SRR7873472	2018	M	16 - 60	England	Unknown	N/A	1.1.1.1.377.394.2155	Available	1 and 2	3	SRR7873472			PRJNA315192	3.6.1.1.2	CipR.MSM5	strong	1.1.1.1.377	Yes	Yes	Present	Present	Present	Present	Absent	Absent	Present	Present	Present	Present	Present	Present	Present	Present	Present	Present	Present	Present
SRR7890020	2018	M	16 - 60	England	No	N/A	1.1.1.1.377.394.2155	Available	1 and 2	3	SRR7890020			PRJNA315192	3.6.1.1.2	CipR.MSM5	strong	1.1.1.1.377	Yes	Yes	Present	Absent	Absent	Present	Absent	Absent	Present	Present	Present	Absent	Absent	Present	Present	Present	Present	Present	Present	Present
SRR7890114	2018	M	16 - 60	England	Unknown	N/A	1.1.1.1.377.394.2803	Available	1 and 2	1	SRR7890114			PRJNA315192	3.6.1.1.2	CipR.MSM5	strong	1.1.1.1.377	Yes	Yes	Present	Present	Present	Present	Absent	Absent	Present	Present	Present	Present	Present	Present	Present	Present	Present	Present	Present	Present
SRR7892119	2018	M	16 - 60	England	Unknown	N/A	1.1.1.1.377.394.2420	Available	1 and 2	3	SRR7892119			PRJNA315192	3.6.1.1.2	CipR.MSM5	strong	1.1.1.1.377	Yes	Yes	Present	Present	Present	Present	Absent	Absent	Present	Present	Present	Present	Present	Present	Present	Present	Present	Present	Present	Present
SRR7892121	2018	M	16 - 60	England	No	N/A	1.1.1.1.377.394.2720	Available	1 and 2	1	SRR7892121			PRJNA315192	3.6.1.1.2	CipR.MSM5	strong	1.1.1.1.377	Yes	Yes	Present	Present	Present	Present	Absent	Absent	Present	Present	Present	Present	Present	Present	Present	Present	Present	Present	Present	Present
SRR7892533	2018	M	16 - 60	England	Unknown	N/A	1.1.1.1.377.394.2816	Available	1 and 2	1	SRR7892533			PRJNA315192	3.6.1.1.2	CipR.MSM5	strong	1.1.1.1.377	Yes	Yes	Present	Present	Present	Present	Absent	Absent	Present	Present	Present	Present	Present	Present	Present	Present	Present	Present	Present	Present
SRR7896000	2018	M	16 - 60	England	Unknown	N/A	1.1.1.1.377.394.2821	Available	1 and 2	4	SRR7896000			PRJNA315192	3.6.1.1.2	CipR.MSM5	strong	1.1.1.1.377	Yes	Yes	Present	Present	Present	Present	Absent	Absent	Present	Present	Present	Present	Present	Present	Present	Present	Present	Present	Present	Present
SRR7943898	2018	M	16 - 60	England	Unknown	N/A	1.1.1.1.377.394.2828	Available	1 and 2	1	SRR7943898			PRJNA315192	3.6.1.1.2	CipR.MSM5	strong	1.1.1.1.377	Yes	Yes	Absent	Present	Present	Absent	Absent	Absent	Absent	Absent	Absent	Present	Present	Present	Absent	Present	Absent	Present	Present	Present
SRR7943920	2018	M	16 - 60	England	Yes	Europe	1.1.1.1.377.1863.2827	Available	1 and 2	1	SRR7943920			PRJNA315192	3.6.1.1.2	CipR.MSM5	strong	1.1.1.1.377	Yes	Yes	Present	Present	Present	Present	Absent	Absent	Present	Present	Present	Present	Present	Present	Present	Present	Present	Present	Present	Present
SRR7956009	2018	M	16 - 60	England	Unknown	N/A	1.1.1.1.377.394.2841	Available	1 and 2	1	SRR7956009			PRJNA315192	3.6.1.1.2	CipR.MSM5	strong	1.1.1.1.377	Yes	Yes	Present	Present	Present	Present	Absent	Absent	Present	Present	Present	Present	Present	Present	Present	Present	Present	Present	Present	Present
SRR7974370	2018	F	> 60	England	Unknown	N/A	1.1.1.1.377.1602.2851	Available	1 and 2	3	SRR7974370			PRJNA315192	3.6.1.1.2	CipR.MSM5	strong	1.1.1.1.377	Yes	Yes	Present	Absent	Absent	Present	Absent	Absent	Present	Present	Present	Absent	Absent	Present	Present	Present	Present	Present	Present	Present
SRR7974372	2018	M	16 - 60	England	Unknown	N/A	1.1.1.1.377.394.2420	Available	1 and 2	3	SRR7974372			PRJNA315192	3.6.1.1.2	CipR.MSM5	strong	1.1.1.1.377	Yes	Yes	Present	Present	Present	Present	Absent	Absent	Present	Present	Present	Present	Present	Present	Present	Present	Present	Present	Present	Present
SRR7975977	2018	M	16 - 60	England	Unknown	N/A	1.1.1.1.377.394.2862	Available	1 and 2	3	SRR7975977			PRJNA315192	3.6.1.1.2	CipR.MSM5	strong	1.1.1.1.377	Yes	Yes	Present	Present	Present	Present	Absent	Absent	Present	Present	Present	Present	Present	Present	Present	Present	Present	Present	Present	Present
SRR7975984	2018	M	16 - 60	England	Unknown	N/A	1.1.1.1.377.394.2426	Available	1 and 2	3	SRR7975984			PRJNA315192	3.6.1.1.2	CipR.MSM5	strong	1.1.1.1.377	Yes	Yes	Present	Present	Present	Present	Absent	Absent	Present	Present	Present	Present	Present	Present	Present	Present	Present	Present	Present	Present
SRR7975988	2018	M	16 - 60	England	Unknown	N/A	1.1.1.1.377.394.2720	Available	1 and 2	1	SRR7975988			PRJNA315192	3.6.1.1.2	CipR.MSM5	strong	1.1.1.1.377	Yes	Yes	Present	Present	Present	Present	Absent	Absent	Present	Present	Present	Present	Present	Present	Present	Present	Present	Present	Present	Present
SRR7979557	2018	M	16 - 60	England	No	N/A	1.1.1.1.377.394.2862	Available	1 and 2	3	SRR7979557			PRJNA315192	3.6.1.1.2	CipR.MSM5	strong	1.1.1.1.377	Yes	Yes	Present	Present	Present	Present	Absent	Absent	Present	Present	Present	Present	Present	Present	Present	Present	Present	Present	Present	Present
SRR8086712	2018	M	16 - 60	England	Yes	Europe	1.1.1.1.377.394.2024	Available	1 and 2	1	SRR8086712			PRJNA315192	3.6.1.1.2	CipR.MSM5	strong	1.1.1.1.377	Yes	Yes	Present	Present	Present	Present	Absent	Absent	Present	Present	Present	Present	Present	Present	Present	Present	Present	Present	Present	Present
SRR8086720	2018	M	16 - 60	England	Yes	Europe	1.1.1.1.377.394.2681	Available	1 and 2	1	SRR8086720			PRJNA315192	3.6.1.1.2	CipR.MSM5	strong	1.1.1.1.377	Yes	Yes	Present	Present	Present	Present	Absent	Absent	Present	Present	Present	Present	Present	Present	Present	Present	Present	Present	Present	Present
SRR8086737	2018	M	16 - 60	England	Yes	Europe	1.1.1.1.377.394.2024	Available	1 and 2	1	SRR8086737			PRJNA315192	3.6.1.1.2	CipR.MSM5	strong	1.1.1.1.377	Yes	Yes	Present	Present	Present	Present	Absent	Absent	Present	Present	Present	Present	Present	Present	Present	Present	Present	Present	Present	Present
SRR8097455	2018	M	16 - 60	England	Yes	Europe	1.1.1.1.377.1898.2892	Available	1 and 2	3	SRR8097455			PRJNA315192	3.6.1.1.2	CipR.MSM5	strong	1.1.1.1.377	Yes	Yes	Present	Absent	Absent	Present	Absent	Absent	Present	Present	Present	Absent	Absent	Present	Present	Present	Present	Present	Present	Present
SRR8097464	2018	M	16 - 60	England	Unknown	N/A	1.1.1.1.377.394.2426	Available	1 and 2	3	SRR8097464			PRJNA315192	3.6.1.1.2	CipR.MSM5	strong	1.1.1.1.377	Yes	Yes	Present	Present	Present	Present	Absent	Absent	Present	Present	Present	Present	Present	Present	Present	Present	Present	Present	Present	Present
SRR8114772	2018	M	16 - 60	England	Unknown	N/A	1.1.1.1.377.394.2453	Available	1 and 2	4	SRR8114772			PRJNA315192	3.6.1.1.2	CipR.MSM5	strong	1.1.1.1.377	Yes	Yes	Present	Present	Present	Present	Absent	Absent	Present	Present	Present	Present	Present	Present	Present	Present	Present	Present	Present	Present
SRR8114788	2018	M	16 - 60	England	Unknown	N/A	1.1.1.1.377.394.2915	Available	1 and 2	4	SRR8114788			PRJNA315192	3.6.1.1.2	CipR.MSM5	strong	1.1.1.1.377	Yes	Yes	Present	Present	Present	Present	Absent	Absent	Present	Present	Present	Present	Present	Present	Present	Present	Present	Present	Present	Present
SRR8117834	2018	M	16 - 60	England	No	N/A	1.1.1.1.377.394.2914	Available	1 and 2	3	SRR8117834			PRJNA315192	3.6.1.1.2	CipR.MSM5	strong	1.1.1.1.377	Yes	Yes	Present	Present	Present	Present	Absent	Absent	Present	Present	Present	Present	Present	Present	Present	Present	Present	Present	Present	Present
SRR8148954	2018	M	16 - 60	England	Unknown	N/A	1.1.1.1.377.394.2440	Available	1 and 2	4	SRR8148954			PRJNA315192	3.6.1.1.2	CipR.MSM5	strong	1.1.1.1.377	Yes	Yes	Present	Present	Present	Present	Absent	Absent	Present	Present	Present	Present	Present	Present	Present	Present	Present	Present	Present	Present
SRR8166012	2018	M	16 - 60	England	Unknown	N/A	1.1.1.1.377.394.2950	Available	1 and 2	1	SRR8166012			PRJNA315192	3.6.1.1.2	CipR.MSM5	strong	1.1.1.1.377	Yes	Yes	Present	Present	Present	Present	Absent	Absent	Present	Present	Present	Present	Present	Present	Present	Present	Present	Present	Present	Present
SRR8172599	2018	M	16 - 60	England	Unknown	N/A	1.1.1.1.377.394.2426	Available	1 and 2	3	SRR8172599			PRJNA315192	3.6.1.1.2	CipR.MSM5	strong	1.1.1.1.377	Yes	Yes	Present	Present	Present	Present	Absent	Absent	Present	Present	Present	Present	Present	Present	Present	Present	Present	Present	Present	Present
SRR8172606	2018	M	16 - 60	England	No	N/A	1.1.1.1.377.394.2948	Available	1 and 2	3	SRR8172606			PRJNA315192	3.6.1.1.2	CipR.MSM5	strong	1.1.1.1.377	Yes	Yes	Present	Present	Present	Present	Absent	Absent	Present	Present	Present	Present	Present	Present	Present	Present	Present	Present	Present	Present
SRR8176555	2018	M	16 - 60	England	Unknown	N/A	1.1.1.1.377.394.2945	Available	1 and 2	3	SRR8176555			PRJNA315192	3.6.1.1.2	CipR.MSM5	strong	1.1.1.1.377	Yes	Yes	Present	Present	Present	Present	Absent	Absent	Present	Present	Present	Present	Present	Present	Present	Present	Present	Present	Present	Present
SRR8182581	2018	M	16 - 60	England	Unknown	N/A	1.1.1.1.377.394.2975	Available	1 and 2	1	SRR8182581			PRJNA315192	3.6.1.1.2	CipR.MSM5	strong	1.1.1.1.377	Yes	Yes	Present	Present	Present	Present	Absent	Absent	Present	Present	Present	Present	Present	Present	Present	Present	Present	Present	Present	Present
SRR8182701	2018	M	16 - 60	England	Unknown	N/A	1.1.1.1.377.394.2967	Available	1 and 2	3	SRR8182701			PRJNA315192	3.6.1.1.2	CipR.MSM5	strong	1.1.1.1.377	Yes	Yes	Present	Present	Present	Present	Absent	Absent	Present	Present	Present	Present	Present	Present	Present	Present	Present	Present	Present	Present
SRR8183260	2018	M	16 - 60	England	Unknown	N/A	1.1.1.1.377.394.2974	Available	1 and 2	3	SRR8183260			PRJNA315192	3.6.1.1.2	CipR.MSM5	strong	1.1.1.1.377	Yes	Yes	Present	Present	Present	Present	Absent	Absent	Present	Present	Present	Present	Present	Present	Present	Present	Present	Present	Present	Present
SRR8194837	2018	M	16 - 60	England	No	N/A	1.1.1.1.377.394.2024	Available	1 and 2	1	SRR8194837			PRJNA315192	3.6.1.1.2	CipR.MSM5	strong	1.1.1.1.377	Yes	Yes	Present	Present	Present	Present	Absent	Absent	Present	Present	Present	Present	Present	Present	Present	Present	Present	Present	Present	Present
SRR8194840	2018	M	16 - 60	England	Unknown	N/A	1.1.1.1.377.1602.2981	Available	1 and 2	3	SRR8194840			PRJNA315192	3.6.1.1.2	CipR.MSM5	strong	1.1.1.1.377	Yes	Yes	Present	Present	Present	Present	Absent	Absent	Present	Present	Present	Present	Present	Present	Present	Present	Present	Present	Present	Present
SRR8194856	2018	M	16 - 60	England	Unknown	N/A	1.1.1.1.377.394.2980	Available	1 and 2	3	SRR8194856			PRJNA315192	3.6.1.1.2	CipR.MSM5	strong	1.1.1.1.377	Yes	Yes	Present	Present	Present	Present	Absent	Absent	Present	Present	Present	Present	Present	Present	Present	Present	Present	Present	Present	Present
SRR8194864	2018	F	16 - 60	England	Unknown	N/A	1.1.1.1.377.1940.2984	Available	1 and 2	3	SRR8194864			PRJNA315192	3.6.1.1.2	CipR.MSM5	strong	1.1.1.1.377	Yes	Yes	Present	Absent	Absent	Present	Absent	Absent	Present	Present	Present	Absent	Absent	Present	Present	Present	Present	Present	Present	Present
SRR8201565	2018	M	16 - 60	England	Unknown	N/A	1.1.1.1.377.394.2985	Available	1 and 2	1	SRR8201565			PRJNA315192	3.6.1.1.2	CipR.MSM5	strong	1.1.1.1.377	Yes	Yes	Present	Present	Present	Present	Absent	Absent	Present	Present	Present	Present	Present	Present	Present	Present	Present	Present	Present	Present
SRR8201567	2018	Unknown	< 16	England	Unknown	N/A	1.1.1.1.377.394.2420	Available	1 and 2	3	SRR8201567			PRJNA315192	3.6.1.1.2	CipR.MSM5	strong	1.1.1.1.377	Yes	Yes	Present	Present	Present	Present	Absent	Absent	Present	Present	Present	Present	Present	Present	Present	Present	Present	Present	Present	Present
SRR8204008	2018	M	16 - 60	England	Unknown	N/A	1.1.1.1.377.394.2987	Available	1 and 2	1	SRR8204008			PRJNA315192	3.6.1.1.2	CipR.MSM5	strong	1.1.1.1.377	Yes	Yes	Present	Present	Present	Present	Absent	Absent	Present	Present	Present	Present	Present	Present	Present	Present	Present	Present	Present	Present
SRR8204010	2018	M	16 - 60	England	No	N/A	1.1.1.1.377.394.2440	Available	1 and 2	4	SRR8204010			PRJNA315192	3.6.1.1.2	CipR.MSM5	strong	1.1.1.1.377	Yes	Yes	Present	Present	Present	Present	Absent	Absent	Present	Present	Present	Present	Present	Present	Present	Present	Present	Present	Present	Present
SRR8217588	2018	M	16 - 60	England	Unknown	N/A	1.1.1.1.377.394.2155	Available	1 and 2	3	SRR8217588			PRJNA315192	3.6.1.1.2	CipR.MSM5	strong	1.1.1.1.377	Yes	Yes	Present	Present	Present	Present	Absent	Absent	Present	Present	Present	Present	Present	Present	Present	Present	Present	Present	Present	Present
SRR8238022	2018	M	16 - 60	England	Unknown	N/A	1.1.1.1.377.394.2426	Available	1 and 2	3	SRR8238022			PRJNA315192	3.6.1.1.2	CipR.MSM5	strong	1.1.1.1.377	Yes	Yes	Absent	Present	Present	Absent	Absent	Absent	Absent	Absent	Absent	Present	Present	Present	Absent	Present	Absent	Present	Present	Present
SRR8263045	2018	M	16 - 60	England	Unknown	N/A	1.1.1.1.377.394.3010	Available	1 and 2	1	SRR8263045			PRJNA315192	3.6.1.1.2	CipR.MSM5	strong	1.1.1.1.377	Yes	Yes	Present	Present	Present	Present	Absent	Absent	Present	Present	Present	Present	Present	Present	Present	Present	Present	Present	Present	Present
SRR8268971	2018	M	16 - 60	England	Unknown	N/A	1.1.1.1.377.394.3014	Available	1 and 2	1	SRR8268971			PRJNA315192	3.6.1.1.2	CipR.MSM5	strong	1.1.1.1.377	Yes	Yes	Present	Present	Present	Present	Absent	Absent	Present	Present	Present	Present	Present	Present	Present	Present	Present	Present	Present	Present
SRR8281086	2018	M	16 - 60	England	Unknown	N/A	1.1.1.1.377.394.3021	Available	1 and 2	1	SRR8281086			PRJNA315192	3.6.1.1.2	CipR.MSM5	strong	1.1.1.1.377	Yes	Yes	Present	Present	Present	Present	Absent	Absent	Present	Present	Present	Present	Present	Present	Present	Present	Present	Present	Present	Present
SRR8293479	2018	M	16 - 60	England	No	N/A	1.1.1.1.377.394.2974	Available	1 and 2	3	SRR8293479			PRJNA315192	3.6.1.1.2	CipR.MSM5	strong	1.1.1.1.377	Yes	Yes	Present	Present	Present	Present	Absent	Absent	Present	Present	Present	Present	Present	Present	Present	Present	Present	Present	Present	Present
SRR8293486	2018	M	16 - 60	England	Unknown	N/A	1.1.1.1.377.394.3032	Available	1 and 2	3	SRR8293486			PRJNA315192	3.6.1.1.2	CipR.MSM5	strong	1.1.1.1.377	Yes	Yes	Present	Present	Present	Present	Absent	Absent	Present	Present	Present	Present	Present	Present	Present	Present	Present	Present	Present	Present
SRR8293492	2018	M	16 - 60	England	Unknown	N/A	1.1.1.1.377.394.3036	Available	1 and 2	1	SRR8293492			PRJNA315192	3.6.1.1.2	CipR.MSM5	strong	1.1.1.1.377	Yes	Yes	Present	Present	Present	Present	Absent	Absent	Present	Present	Present	Present	Present	Present	Present	Present	Present	Present	Present	Present
SRR8293755	2018	M	16 - 60	England	Yes	Europe	1.1.1.1.377.394.3021	Available	1 and 2	1	SRR8293755			PRJNA315192	3.6.1.1.2	CipR.MSM5	strong	1.1.1.1.377	Yes	Yes	Present	Present	Present	Present	Absent	Absent	Present	Present	Present	Present	Present	Present	Present	Present	Present	Present	Present	Present
SRR8299399	2018	M	16 - 60	England	Unknown	N/A	1.1.1.1.377.394.3043	Available	1 and 2	4	SRR8299399			PRJNA315192	3.6.1.1.2	CipR.MSM5	strong	1.1.1.1.377	Yes	Yes	Present	Present	Present	Present	Absent	Absent	Present	Present	Present	Present	Present	Present	Present	Present	Present	Present	Present	Present
SRR8304474	2018	M	16 - 60	England	Unknown	N/A	1.1.1.1.377.394.3036	Available	1 and 2	1	SRR8304474			PRJNA315192	3.6.1.1.2	CipR.MSM5	strong	1.1.1.1.377	Yes	Yes	Present	Present	Present	Present	Absent	Absent	Present	Present	Present	Present	Present	Present	Present	Present	Present	Present	Present	Present
SRR8307273	2018	M	16 - 60	England	Unknown	N/A	1.1.1.1.377.394.3051	Available	1 and 2	1	SRR8307273			PRJNA315192	3.6.1.1.2	CipR.MSM5	strong	1.1.1.1.377	Yes	Yes	Present	Present	Present	Present	Absent	Absent	Present	Present	Present	Present	Present	Present	Present	Present	Present	Present	Present	Present
SRR8366130	2018	M	16 - 60	England	Yes	Europe	1.1.1.1.377.394.2440	Available	1 and 2	4	SRR8366130			PRJNA315192	3.6.1.1.2	CipR.MSM5	strong	1.1.1.1.377	Yes	Yes	Present	Present	Present	Present	Absent	Absent	Present	Present	Present	Present	Present	Present	Present	Present	Present	Present	Present	Present
SRR8366133	2018	M	16 - 60	England	Unknown	N/A	1.1.1.1.377.394.3069	Available	1 and 2	4	SRR8366133			PRJNA315192	3.6.1.1.2	CipR.MSM5	strong	1.1.1.1.377	Yes	Yes	Present	Present	Present	Present	Absent	Absent	Present	Present	Present	Present	Present	Present	Present	Present	Present	Present	Present	Present
SRR8369242	2018	M	16 - 60	England	Unknown	N/A	1.1.1.1.377.394.3076	Available	1 and 2	3	SRR8369242			PRJNA315192	3.6.1.1.2	CipR.MSM5	strong	1.1.1.1.377	Yes	Yes	Present	Absent	Absent	Present	Absent	Absent	Present	Present	Present	Absent	Absent	Present	Present	Present	Present	Present	Present	Present
SRR8369243	2018	M	16 - 60	England	Yes	Asia	1.1.1.1.377.394.2440	Available	1 and 2	4	SRR8369243			PRJNA315192	3.6.1.1.2	CipR.MSM5	strong	1.1.1.1.377	Yes	Yes	Present	Present	Present	Present	Absent	Absent	Present	Present	Present	Present	Present	Present	Present	Present	Present	Present	Present	Present
SRR8369244	2018	M	16 - 60	England	Unknown	N/A	1.1.1.1.377.394.3079	Available	1 and 2	4	SRR8369244			PRJNA315192	3.6.1.1.2	CipR.MSM5	strong	1.1.1.1.377	Yes	Yes	Present	Present	Present	Present	Absent	Absent	Present	Present	Present	Present	Present	Present	Present	Present	Present	Present	Present	Present
SRR8369247	2018	M	16 - 60	England	Unknown	N/A	1.1.1.1.377.394.2440	Available	1 and 2	4	SRR8369247			PRJNA315192	3.6.1.1.2	CipR.MSM5	strong	1.1.1.1.377	Yes	Yes	Present	Present	Present	Present	Absent	Absent	Present	Present	Present	Present	Present	Present	Present	Present	Present	Present	Present	Present
SRR8380556	2018	M	16 - 60	England	Yes	Europe	1.1.1.1.377.394.3085	Available	1 and 2	3	SRR8380556			PRJNA315192	3.6.1.1.2	CipR.MSM5	strong	1.1.1.1.377	Yes	Yes	Present	Present	Present	Present	Absent	Absent	Present	Present	Present	Present	Present	Present	Present	Present	Present	Present	Present	Present
SRR8380563	2018	M	16 - 60	England	Unknown	N/A	1.1.1.1.377.394.3082	Available	1 and 2	1	SRR8380563			PRJNA315192	3.6.1.1.2	CipR.MSM5	strong	1.1.1.1.377	Yes	Yes	Present	Present	Present	Present	Absent	Absent	Present	Present	Present	Present	Present	Present	Present	Present	Present	Present	Present	Present
SRR8381973	2018	M	16 - 60	England	Unknown	N/A	1.1.1.1.377.394.2440	Available	1 and 2	4	SRR8381973			PRJNA315192	3.6.1.1.2	CipR.MSM5	strong	1.1.1.1.377	Yes	Yes	Present	Present	Present	Present	Absent	Absent	Present	Present	Present	Present	Present	Present	Present	Present	Present	Present	Present	Present
SRR8381976	2018	M	16 - 60	England	Unknown	N/A	1.1.1.1.377.394.3021	Available	1 and 2	1	SRR8381976			PRJNA315192	3.6.1.1.2	CipR.MSM5	strong	1.1.1.1.377	Yes	Yes	Present	Present	Present	Present	Absent	Absent	Present	Present	Present	Present	Present	Present	Present	Present	Present	Present	Present	Present
SRR8385379	2018	M	16 - 60	England	Yes	North America	1.1.1.1.377.394.2974	Available	1 and 2	3	SRR8385379			PRJNA315192	3.6.1.1.2	CipR.MSM5	strong	1.1.1.1.377	Yes	Yes	Present	Present	Present	Present	Absent	Absent	Present	Present	Present	Present	Present	Present	Present	Present	Present	Present	Present	Present
SRR8405054	2018	M	16 - 60	England	Unknown	N/A	1.1.1.1.377.394.3093	Available	1 and 2	1	SRR8405054			PRJNA315192	3.6.1.1.2	CipR.MSM5	strong	1.1.1.1.377	Yes	Yes	Present	Present	Present	Present	Absent	Absent	Present	Present	Present	Present	Present	Present	Present	Present	Present	Present	Present	Present
SRR8405057	2018	M	16 - 60	England	Unknown	N/A	1.1.1.1.377.394.3018	Available	1 and 2	4	SRR8405057			PRJNA315192	3.6.1.1.2	CipR.MSM5	strong	1.1.1.1.377	Yes	Yes	Present	Present	Present	Present	Absent	Absent	Present	Present	Present	Present	Present	Present	Present	Present	Present	Present	Present	Present
SRR8419087	2018	M	16 - 60	England	Unknown	N/A	1.1.1.1.377.394.3095	Available	1 and 2	4	SRR8419087			PRJNA315192	3.6.1.1.2	CipR.MSM5	strong	1.1.1.1.377	Yes	Yes	Absent	Present	Present	Absent	Absent	Absent	Absent	Present	Present	Present	Present	Present	Present	Present	Absent	Present	Present	Present
SRR8419427	2018	M	16 - 60	England	Unknown	N/A	1.1.1.1.377.394.2440	Available	1 and 2	4	SRR8419427			PRJNA315192	3.6.1.1.2	CipR.MSM5	strong	1.1.1.1.377	Yes	Yes	Present	Present	Present	Present	Absent	Absent	Present	Present	Present	Present	Present	Present	Present	Present	Present	Present	Present	Present
SRR8427499	2018	M	16 - 60	England	Unknown	N/A	1.1.1.1.377.394.3100	Available	1 and 2	4	SRR8427499			PRJNA315192	3.6.1.1.2	CipR.MSM5	strong	1.1.1.1.377	Yes	Yes	Present	Present	Present	Present	Absent	Absent	Present	Present	Present	Present	Present	Present	Present	Present	Present	Present	Present	Present
SRR8440737	2019	M	16 - 60	England	Unknown	N/A	1.1.1.1.377.394.3106	Available	1 and 2	1	SRR8440737			PRJNA315192	3.6.1.1.2	CipR.MSM5	strong	1.1.1.1.377	Yes	Yes	Present	Present	Present	Present	Absent	Absent	Present	Present	Present	Present	Present	Present	Present	Present	Present	Present	Present	Present
SRR8444439	2018	M	16 - 60	England	Unknown	N/A	1.1.1.1.377.394.3100	Available	1 and 2	4	SRR8444439			PRJNA315192	3.6.1.1.2	CipR.MSM5	strong	1.1.1.1.377	Yes	Yes	Present	Present	Present	Present	Absent	Absent	Present	Present	Present	Present	Present	Present	Present	Present	Present	Present	Present	Present
SRR8444441	2019	M	16 - 60	England	No	N/A	1.1.1.1.377.394.3112	Available	1 and 2	4	SRR8444441			PRJNA315192	3.6.1.1.2	CipR.MSM5	strong	1.1.1.1.377	Yes	Yes	Present	Present	Present	Present	Absent	Absent	Present	Present	Present	Present	Present	Present	Present	Present	Present	Present	Present	Present
SRR8457029	2019	M	16 - 60	England	No	N/A	1.1.1.1.377.394.2935	Available	1 and 2	1	SRR8457029			PRJNA315192	3.6.1.1.2	CipR.MSM5	strong	1.1.1.1.377	Yes	Yes	Present	Present	Present	Present	Absent	Absent	Present	Present	Present	Present	Present	Present	Present	Present	Present	Present	Present	Present
SRR8464947	2019	M	16 - 60	England	Unknown	N/A	1.1.1.1.377.394.3100	Available	1 and 2	4	SRR8464947			PRJNA315192	3.6.1.1.2	CipR.MSM5	strong	1.1.1.1.377	Yes	Yes	Present	Present	Present	Present	Absent	Absent	Present	Present	Present	Present	Present	Present	Present	Present	Present	Present	Present	Present
SRR8464949	2019	M	16 - 60	England	Unknown	N/A	1.1.1.1.377.394.3021	Available	1 and 2	1	SRR8464949			PRJNA315192	3.6.1.1.2	CipR.MSM5	strong	1.1.1.1.377	Yes	Yes	Present	Present	Present	Present	Absent	Absent	Present	Present	Present	Present	Present	Present	Present	Present	Present	Present	Present	Present
SRR8473234	2019	M	16 - 60	England	No	N/A	1.1.1.1.377.394.3112	Available	1 and 2	4	SRR8473234			PRJNA315192	3.6.1.1.2	CipR.MSM5	strong	1.1.1.1.377	Yes	Yes	Present	Present	Present	Present	Absent	Absent	Present	Present	Present	Present	Present	Present	Present	Present	Present	Present	Present	Present
SRR8508335	2019	M	16 - 60	England	No	N/A	1.1.1.1.377.394.3095	Available	1 and 2	4	SRR8508335			PRJNA315192	3.6.1.1.2	CipR.MSM5	strong	1.1.1.1.377	Yes	Yes	Absent	Present	Present	Absent	Absent	Absent	Absent	Present	Present	Present	Present	Present	Present	Present	Absent	Present	Present	Present
SRR8508336	2019	M	16 - 60	England	Unknown	N/A	1.1.1.1.377.394.3021	Available	1 and 2	1	SRR8508336			PRJNA315192	3.6.1.1.2	CipR.MSM5	strong	1.1.1.1.377	Yes	Yes	Present	Present	Present	Present	Absent	Absent	Present	Present	Present	Present	Present	Present	Present	Present	Present	Present	Present	Present
SRR8508340	2019	M	16 - 60	England	Unknown	N/A	1.1.1.1.377.394.3095	Available	1 and 2	4	SRR8508340			PRJNA315192	3.6.1.1.2	CipR.MSM5	strong	1.1.1.1.377	Yes	Yes	Absent	Present	Present	Absent	Absent	Absent	Absent	Present	Present	Present	Present	Present	Present	Present	Absent	Present	Present	Present
SRR8508342	2019	M	16 - 60	England	Unknown	N/A	1.1.1.1.377.394.3021	Available	1 and 2	1	SRR8508342			PRJNA315192	3.6.1.1.2	CipR.MSM5	strong	1.1.1.1.377	Yes	Yes	Present	Present	Present	Present	Absent	Absent	Present	Present	Present	Present	Present	Present	Present	Present	Present	Present	Present	Present
SRR8523764	2019	M	16 - 60	England	Unknown	N/A	1.1.1.1.377.394.3079	Available	1 and 2	4	SRR8523764			PRJNA315192	3.6.1.1.2	CipR.MSM5	strong	1.1.1.1.377	Yes	Yes	Present	Present	Present	Present	Absent	Absent	Present	Present	Present	Present	Present	Present	Present	Present	Present	Present	Present	Present
SRR8524548	2019	M	16 - 60	England	No	N/A	1.1.1.1.377.394.3112	Available	1 and 2	4	SRR8524548			PRJNA315192	3.6.1.1.2	CipR.MSM5	strong	1.1.1.1.377	Yes	Yes	Present	Present	Present	Present	Absent	Absent	Absent	Present	Present	Present	Present	Present	Present	Present	Present	Present	Present	Present
SRR8553835	2019	M	16 - 60	England	Yes	Europe	1.1.1.1.377.394.3153	Available	1 and 2	3	SRR8553835			PRJNA315192	3.6.1.1.2	CipR.MSM5	strong	1.1.1.1.377	Yes	Yes	Present	Present	Present	Present	Absent	Absent	Present	Present	Present	Present	Present	Present	Present	Present	Present	Present	Present	Present
SRR8553837	2019	M	> 60	England	Unknown	N/A	1.1.1.1.377.394.3148	Available	1 and 2	4	SRR8553837			PRJNA315192	3.6.1.1.2	CipR.MSM5	strong	1.1.1.1.377	Yes	Yes	Present	Present	Present	Present	Absent	Absent	Present	Present	Present	Present	Present	Present	Present	Present	Present	Present	Present	Present
SRR8553841	2019	M	16 - 60	England	Unknown	N/A	1.1.1.1.377.394.3152	Available	1 and 2	4	SRR8553841			PRJNA315192	3.6.1.1.2	CipR.MSM5	strong	1.1.1.1.377	Yes	Yes	Absent	Present	Present	Absent	Absent	Absent	Absent	Present	Present	Present	Present	Present	Present	Present	Absent	Present	Present	Present
SRR8558512	2019	M	16 - 60	England	Unknown	N/A	1.1.1.1.377.394.3021	Available	1 and 2	1	SRR8558512			PRJNA315192	3.6.1.1.2	CipR.MSM5	strong	1.1.1.1.377	Yes	Yes	Present	Present	Present	Present	Absent	Absent	Present	Present	Present	Present	Present	Present	Present	Present	Present	Present	Present	Present
SRR8558526	2019	M	16 - 60	England	Unknown	N/A	1.1.1.1.377.394.3158	Available	1 and 2	1	SRR8558526			PRJNA315192	3.6.1.1.2	CipR.MSM5	strong	1.1.1.1.377	Yes	Yes	Present	Present	Present	Present	Absent	Absent	Present	Present	Present	Present	Present	Present	Present	Present	Present	Present	Present	Present
SRR8558586	2019	M	16 - 60	England	Unknown	N/A	1.1.1.1.377.394.3021	Available	1 and 2	1	SRR8558586			PRJNA315192	3.6.1.1.2	CipR.MSM5	strong	1.1.1.1.377	Yes	Yes	Present	Present	Present	Present	Absent	Absent	Present	Present	Present	Present	Present	Present	Present	Present	Present	Present	Present	Present
SRR8568154	2019	M	> 60	England	Unknown	N/A	1.1.1.1.377.394.3161	Available	1 and 2	3	SRR8568154			PRJNA315192	3.6.1.1.2	CipR.MSM5	strong	1.1.1.1.377	Yes	Yes	Present	Present	Present	Present	Absent	Absent	Present	Present	Present	Present	Present	Present	Present	Present	Present	Present	Present	Present
SRR8568231	2019	M	16 - 60	England	Unknown	N/A	1.1.1.1.377.394.3154	Available	1 and 2	1	SRR8568231			PRJNA315192	3.6.1.1.2	CipR.MSM5	strong	1.1.1.1.377	Yes	Yes	Present	Present	Present	Present	Absent	Absent	Present	Present	Present	Present	Present	Present	Present	Present	Present	Present	Present	Present
SRR8586206	2019	F	16 - 60	England	Unknown	N/A	1.1.1.1.377.394.3164	Available	1 and 2	4	SRR8586206			PRJNA315192	3.6.1.1.2	CipR.MSM5	strong	1.1.1.1.377	Yes	Yes	Absent	Present	Present	Absent	Absent	Absent	Absent	Present	Present	Present	Present	Present	Present	Present	Absent	Present	Present	Present
SRR8588620	2019	M	16 - 60	England	Unknown	N/A	1.1.1.1.377.394.3112	Available	1 and 2	4	SRR8588620			PRJNA315192	3.6.1.1.2	CipR.MSM5	strong	1.1.1.1.377	Yes	Yes	Present	Present	Present	Present	Absent	Absent	Present	Present	Present	Present	Present	Present	Present	Present	Present	Present	Present	Present
SRR8599082	2019	M	16 - 60	England	Unknown	N/A	1.1.1.1.377.394.3170	Available	1 and 2	3	SRR8599082			PRJNA315192	3.6.1.1.2	CipR.MSM5	strong	1.1.1.1.377	Yes	Yes	Present	Present	Present	Present	Absent	Absent	Present	Present	Present	Present	Present	Present	Present	Present	Present	Present	Present	Present
SRR8634609	2019	M	> 60	England	Unknown	N/A	1.1.1.1.377.394.2453	Available	1 and 2	4	SRR8634609			PRJNA315192	3.6.1.1.2	CipR.MSM5	strong	1.1.1.1.377	Yes	Yes	Present	Present	Present	Present	Absent	Absent	Present	Present	Present	Present	Present	Present	Present	Present	Present	Present	Present	Present
SRR8634610	2019	M	16 - 60	England	Unknown	N/A	1.1.1.1.377.394.3175	Available	1 and 2	4	SRR8634610			PRJNA315192	3.6.1.1.2	CipR.MSM5	strong	1.1.1.1.377	Yes	Yes	Absent	Present	Present	Absent	Absent	Absent	Absent	Present	Present	Present	Present	Present	Present	Present	Absent	Present	Present	Present
SRR8634622	2019	M	16 - 60	England	No	N/A	1.1.1.1.377.394.3170	Available	1 and 2	3	SRR8634622			PRJNA315192	3.6.1.1.2	CipR.MSM5	strong	1.1.1.1.377	Yes	Yes	Present	Present	Present	Present	Absent	Absent	Present	Present	Present	Present	Present	Present	Present	Present	Present	Present	Present	Present
SRR8656995	2019	M	16 - 60	England	Unknown	N/A	1.1.1.1.377.394.3182	Available	1 and 2	4	SRR8656995			PRJNA315192	3.6.1.1.2	CipR.MSM5	strong	1.1.1.1.377	Yes	Yes	Present	Present	Present	Present	Absent	Absent	Present	Present	Present	Present	Present	Present	Present	Present	Present	Present	Present	Present
SRR8670884	2019	M	16 - 60	England	Unknown	N/A	1.1.1.1.377.394.3185	Available	1 and 2	3	SRR8670884			PRJNA315192	3.6.1.1.2	CipR.MSM5	strong	1.1.1.1.377	Yes	Yes	Present	Present	Present	Present	Absent	Absent	Present	Present	Present	Present	Present	Present	Present	Present	Present	Present	Present	Present
SRR8704596	2019	M	16 - 60	England	Unknown	N/A	1.1.1.1.377.394.3021	Available	1 and 2	1	SRR8704596			PRJNA315192	3.6.1.1.2	CipR.MSM5	strong	1.1.1.1.377	Yes	Yes	Present	Present	Present	Present	Absent	Absent	Present	Present	Present	Present	Present	Present	Present	Present	Present	Present	Present	Present
SRR8704597	2019	M	16 - 60	England	Unknown	N/A	1.1.1.1.377.394.3189	Available	1 and 2	3	SRR8704597			PRJNA315192	3.6.1.1.2	CipR.MSM5	strong	1.1.1.1.377	Yes	Yes	Present	Present	Present	Present	Absent	Absent	Present	Present	Present	Present	Present	Present	Present	Present	Present	Present	Present	Present
SRR8737843	2019	M	16 - 60	England	Unknown	N/A	1.1.1.1.377.394.3112	Available	1 and 2	4	SRR8737843			PRJNA315192	3.6.1.1.2	CipR.MSM5	strong	1.1.1.1.377	Yes	Yes	Present	Present	Present	Present	Absent	Absent	Present	Present	Present	Present	Present	Present	Present	Present	Present	Present	Present	Present
SRR8737850	2019	M	16 - 60	England	Unknown	N/A	1.1.1.1.377.394.3196	Available	1 and 2	3	SRR8737850			PRJNA315192	3.6.1.1.2	CipR.MSM5	strong	1.1.1.1.377	Yes	Yes	Present	Present	Present	Present	Absent	Absent	Present	Present	Present	Present	Present	Present	Present	Present	Present	Present	Present	Present
SRR8737852	2019	M	16 - 60	England	Unknown	N/A	1.1.1.1.377.394.3112	Available	1 and 2	4	SRR8737852			PRJNA315192	3.6.1.1.2	CipR.MSM5	strong	1.1.1.1.377	Yes	Yes	Present	Present	Present	Present	Absent	Absent	Present	Present	Present	Present	Present	Present	Present	Present	Present	Present	Present	Present
SRR8740647	2019	M	16 - 60	England	Unknown	N/A	1.1.1.1.377.394.3112	Available	1 and 2	4	SRR8740647			PRJNA315192	3.6.1.1.2	CipR.MSM5	strong	1.1.1.1.377	Yes	Yes	Present	Present	Present	Present	Absent	Absent	Present	Present	Present	Present	Present	Present	Present	Present	Present	Present	Present	Present
SRR8746514	2019	M	16 - 60	England	Unknown	N/A	1.1.1.1.377.394.3201	Available	1 and 2	4	SRR8746514			PRJNA315192	3.6.1.1.2	CipR.MSM5	strong	1.1.1.1.377	Yes	Yes	Present	Present	Present	Present	Absent	Absent	Present	Present	Present	Present	Present	Present	Present	Present	Present	Present	Present	Present
SRR8771434	2019	M	16 - 60	England	Unknown	N/A	1.1.1.1.377.394.3021	Available	1 and 2	1	SRR8771434			PRJNA315192	3.6.1.1.2	CipR.MSM5	strong	1.1.1.1.377	Yes	Yes	Present	Present	Present	Present	Absent	Absent	Present	Present	Present	Present	Present	Present	Present	Present	Present	Present	Present	Present
SRR8771456	2019	M	> 60	England	Unknown	N/A	1.1.1.1.377.394.3206	Available	1 and 2	4	SRR8771456			PRJNA315192	3.6.1.1.2	CipR.MSM5	strong	1.1.1.1.377	Yes	Yes	Present	Present	Present	Present	Absent	Absent	Present	Present	Present	Present	Present	Present	Present	Present	Present	Present	Present	Present
SRR8771460	2019	M	16 - 60	England	Unknown	N/A	1.1.1.1.377.394.3170	Available	1 and 2	3	SRR8771460			PRJNA315192	3.6.1.1.2	CipR.MSM5	strong	1.1.1.1.377	Yes	Yes	Present	Present	Present	Present	Absent	Absent	Present	Present	Present	Present	Present	Present	Present	Present	Present	Present	Present	Present
SRR8775480	2019	M	16 - 60	England	Unknown	N/A	1.1.1.1.377.394.3112	Available	1 and 2	4	SRR8775480			PRJNA315192	3.6.1.1.2	CipR.MSM5	strong	1.1.1.1.377	Yes	Yes	Present	Present	Present	Present	Absent	Absent	Present	Present	Present	Present	Present	Present	Present	Present	Present	Present	Present	Present
SRR8775482	2019	M	16 - 60	England	Unknown	N/A	1.1.1.1.377.394.3209	Available	1 and 2	3	SRR8775482			PRJNA315192	3.6.1.1.2	CipR.MSM5	strong	1.1.1.1.377	Yes	Yes	Present	Present	Present	Present	Absent	Absent	Present	Present	Present	Present	Present	Present	Present	Present	Present	Present	Present	Present
SRR8820015	2019	M	16 - 60	England	Unknown	N/A	1.1.1.1.377.2053.3216	Available	1 and 2	1	SRR8820015			PRJNA315192	3.6.1.1.2	CipR.MSM5	strong	1.1.1.1.377	Yes	Yes	Present	Present	Present	Present	Absent	Absent	Present	Present	Present	Present	Present	Present	Present	Present	Present	Present	Present	Present
SRR8832684	2019	M	16 - 60	England	Unknown	N/A	1.1.1.1.377.394.3220	Available	1 and 2	1	SRR8832684			PRJNA315192	3.6.1.1.2	CipR.MSM5	strong	1.1.1.1.377	Yes	Yes	Present	Present	Present	Present	Absent	Absent	Present	Present	Present	Present	Present	Present	Present	Present	Present	Present	Present	Present
SRR8856256	2019	Unknown	16 - 60	England	Unknown	N/A	1.1.1.1.377.394.3222	Available	1 and 2	4	SRR8856256			PRJNA315192	3.6.1.1.2	CipR.MSM5	strong	1.1.1.1.377	Yes	Yes	Present	Present	Present	Present	Absent	Absent	Present	Present	Present	Present	Present	Present	Present	Present	Present	Present	Present	Present
SRR8866687	2019	M	16 - 60	England	Unknown	N/A	1.1.1.1.377.394.3170	Available	1 and 2	3	SRR8866687			PRJNA315192	3.6.1.1.2	CipR.MSM5	strong	1.1.1.1.377	Yes	Yes	Present	Present	Present	Present	Absent	Absent	Present	Present	Present	Present	Present	Present	Present	Present	Present	Present	Present	Present
SRR8873628	2019	M	16 - 60	England	Unknown	N/A	1.1.1.1.377.394.3189	Available	1 and 2	3	SRR8873628			PRJNA315192	3.6.1.1.2	CipR.MSM5	strong	1.1.1.1.377	Yes	Yes	Present	Present	Present	Present	Absent	Absent	Present	Present	Present	Present	Present	Present	Present	Present	Present	Present	Present	Present
SRR8878447	2019	M	16 - 60	England	Yes	Europe	1.1.1.1.377.394.3079	Available	1 and 2	4	SRR8878447			PRJNA315192	3.6.1.1.2	CipR.MSM5	strong	1.1.1.1.377	Yes	Yes	Present	Present	Present	Present	Absent	Absent	Present	Present	Present	Present	Present	Present	Present	Present	Present	Present	Present	Present
SRR8924477	2019	M	16 - 60	England	Unknown	N/A	1.1.1.1.377.394.3112	Available	1 and 2	4	SRR8924477			PRJNA315192	3.6.1.1.2	CipR.MSM5	strong	1.1.1.1.377	Yes	Yes	Present	Present	Present	Present	Absent	Absent	Present	Present	Present	Present	Present	Present	Present	Present	Present	Present	Present	Present
SRR8936110	2019	M	16 - 60	England	Unknown	N/A	1.1.1.1.377.1898.3241	Available	1 and 2	3	SRR8936110			PRJNA315192	3.6.1.1.2	CipR.MSM5	strong	1.1.1.1.377	Yes	Yes	Present	Present	Present	Present	Absent	Absent	Present	Present	Present	Present	Present	Present	Present	Present	Present	Present	Present	Present
SRR8936120	2019	M	16 - 60	England	Yes	Europe	1.1.1.1.377.1898.3244	Available	1 and 2	3	SRR8936120			PRJNA315192	3.6.1.1.2	CipR.MSM5	strong	1.1.1.1.377	Yes	Yes	Present	Present	Present	Present	Absent	Absent	Present	Present	Present	Present	Present	Present	Present	Present	Present	Present	Present	Present
SRR8979697	2019	M	16 - 60	England	Unknown	N/A	1.1.1.1.377.1898.3244	Available	1 and 2	3	SRR8979697			PRJNA315192	3.6.1.1.2	CipR.MSM5	strong	1.1.1.1.377	Yes	Yes	Present	Present	Present	Present	Absent	Absent	Present	Present	Present	Present	Present	Present	Present	Present	Present	Present	Present	Present
SRR8979719	2019	M	16 - 60	England	Unknown	N/A	1.1.1.1.377.394.3158	Available	1 and 2	1	SRR8979719			PRJNA315192	3.6.1.1.2	CipR.MSM5	strong	1.1.1.1.377	Yes	Yes	Present	Present	Present	Present	Absent	Absent	Present	Present	Present	Present	Present	Present	Present	Present	Present	Present	Present	Present
SRR9007502	2019	M	16 - 60	England	Unknown	N/A	1.1.1.1.377.2053.3263	Available	1 and 2	1	SRR9007502			PRJNA315192	3.6.1.1.2	CipR.MSM5	strong	1.1.1.1.377	Yes	Yes	Present	Present	Present	Present	Absent	Absent	Present	Present	Present	Present	Present	Present	Present	Present	Present	Present	Present	Present
SRR9018545	2019	M	16 - 60	England	No	N/A	1.1.1.1.377.394.3270	Available	1 and 2	3	SRR9018545			PRJNA315192	3.6.1.1.2	CipR.MSM5	strong	1.1.1.1.377	Yes	Yes	Present	Absent	Absent	Present	Absent	Absent	Present	Present	Present	Absent	Absent	Present	Present	Present	Present	Present	Present	Present
SRR9050409	2019	M	16 - 60	England	Unknown	N/A	1.1.1.1.377.394.3270	Available	1 and 2	3	SRR9050409			PRJNA315192	3.6.1.1.2	CipR.MSM5	strong	1.1.1.1.377	Yes	Yes	Present	Absent	Absent	Present	Absent	Absent	Present	Present	Present	Absent	Absent	Present	Present	Present	Present	Present	Present	Present
SRR9083747	2019	M	> 60	England	Unknown	N/A	1.1.1.1.377.394.3284	Available	1 and 2	1	SRR9083747			PRJNA315192	3.6.1.1.2	CipR.MSM5	strong	1.1.1.1.377	Yes	Yes	Present	Present	Present	Present	Absent	Absent	Present	Present	Present	Present	Present	Present	Present	Present	Present	Present	Present	Present
SRR9095166	2019	M	16 - 60	England	No	N/A	1.1.1.1.377.394.3284	Available	1 and 2	1	SRR9095166			PRJNA315192	3.6.1.1.2	CipR.MSM5	strong	1.1.1.1.377	Yes	Yes	Present	Present	Present	Present	Absent	Absent	Present	Present	Present	Present	Present	Present	Present	Present	Present	Present	Present	Present
SRR9178549	2019	M	16 - 60	England	No	N/A	1.1.1.1.377.2118.3318	Available	1 and 2	3	SRR9178549			PRJNA315192	3.6.1.1.2	CipR.MSM5	strong	1.1.1.1.377	Yes	Yes	Present	Present	Present	Present	Absent	Absent	Present	Present	Present	Present	Present	Present	Present	Present	Present	Present	Present	Present
SRR9258481	2019	M	16 - 60	England	Unknown	N/A	1.1.1.1.377.394.3189	Available	1 and 2	3	SRR9258481			PRJNA315192	3.6.1.1.2	CipR.MSM5	strong	1.1.1.1.377	Yes	Yes	Present	Present	Present	Present	Absent	Absent	Present	Present	Present	Present	Present	Present	Present	Present	Present	Present	Present	Present
SRR9259112	2019	M	16 - 60	England	No	N/A	1.1.1.1.377.1898.3241	Available	1 and 2	3	SRR9259112			PRJNA315192	3.6.1.1.2	CipR.MSM5	strong	1.1.1.1.377	Yes	Yes	Present	Present	Present	Present	Absent	Absent	Present	Present	Present	Present	Present	Present	Present	Present	Present	Present	Present	Present
SRR9259160	2019	M	16 - 60	England	Yes	Africa	1.1.1.1.377.2129.3340	Available	1 and 2	1	SRR9259160			PRJNA315192	3.6.1.1.2	CipR.MSM5	strong	1.1.1.1.377	Yes	Yes	Present	Present	Present	Present	Absent	Absent	Present	Present	Present	Present	Present	Present	Present	Present	Present	Present	Present	Present
SRR9259171	2019	F	> 60	England	Unknown	N/A	1.1.1.1.377.394.3261	Available	1 and 2	4	SRR9259171			PRJNA315192	3.6.1.1.2	CipR.MSM5	strong	1.1.1.1.377	Yes	Yes	Present	Present	Present	Present	Absent	Absent	Present	Present	Present	Present	Present	Present	Present	Present	Present	Present	Present	Present
SRR9259313	2019	M	16 - 60	England	Unknown	N/A	1.1.1.1.377.2123.3327	Available	1 and 2	3	SRR9259313			PRJNA315192	3.6.1.1.2	CipR.MSM5	strong	1.1.1.1.377	Yes	Yes	Present	Absent	Absent	Present	Absent	Absent	Present	Present	Present	Absent	Absent	Present	Present	Present	Present	Present	Present	Present
SRR9259392	2019	M	16 - 60	England	Unknown	N/A	1.1.1.1.377.394.3312	Available	1 and 2	1	SRR9259392			PRJNA315192	3.6.1.1.2	CipR.MSM5	strong	1.1.1.1.377	Yes	Yes	Present	Present	Present	Present	Absent	Absent	Present	Present	Present	Present	Present	Present	Present	Present	Present	Present	Present	Present
SRR9259535	2019	M	16 - 60	England	Unknown	N/A	1.1.1.1.377.394.3290	Available	1 and 2	1	SRR9259535			PRJNA315192	3.6.1.1.2	CipR.MSM5	strong	1.1.1.1.377	Yes	Yes	Present	Present	Present	Present	Absent	Absent	Present	Present	Present	Present	Present	Present	Present	Present	Present	Present	Present	Present
SRR9259954	2019	M	16 - 60	England	Unknown	N/A	1.1.1.1.377.394.3300	Available	1 and 2	3	SRR9259954			PRJNA315192	3.6.1.1.2	CipR.MSM5	strong	1.1.1.1.377	Yes	Yes	Present	Absent	Absent	Present	Absent	Absent	Present	Present	Present	Absent	Absent	Present	Present	Present	Present	Present	Present	Present
SRR9260046	2019	M	16 - 60	England	Unknown	N/A	1.1.1.1.377.394.3291	Available	1 and 2	3	SRR9260046			PRJNA315192	3.6.1.1.2	CipR.MSM5	strong	1.1.1.1.377	Yes	Yes	Present	Present	Present	Present	Absent	Absent	Present	Present	Present	Present	Present	Present	Present	Present	Present	Present	Present	Present
SRR9260354	2019	M	16 - 60	England	No	N/A	1.1.1.1.377.2053.3263	Available	1 and 2	1	SRR9260354			PRJNA315192	3.6.1.1.2	CipR.MSM5	strong	1.1.1.1.377	Yes	Yes	Present	Present	Present	Present	Absent	Absent	Present	Present	Present	Present	Present	Present	Present	Present	Present	Present	Present	Present
SRR9260664	2019	M	16 - 60	England	Unknown	N/A	1.1.1.1.377.394.3313	Available	1 and 2	3	SRR9260664			PRJNA315192	3.6.1.1.2	CipR.MSM5	strong	1.1.1.1.377	Yes	Yes	Present	Present	Present	Present	Absent	Absent	Present	Present	Present	Present	Present	Present	Present	Present	Present	Present	Present	Present
20-001-0151	2020	224 SAMPLES MALE, 8 FEMALE	AVERAGE 40 [19 - 83]	Australia (NSW)	Unknown	N/A	N/A	N/A	2	5	PENDING			PRJNA613115	3.6.1.1.2	CipR.MSM5	strong			Yes	Present	Present	Present	Present	Absent	Present	Present	Present	Present	Present	Present	Present	Present	Present	Present	Present	Present	Present
SRR9260990	2019	M	16 - 60	England	Unknown	N/A	1.1.1.1.377.2123.3327	Available	1 and 2	3	SRR9260990			PRJNA315192	3.6.1.1.2	CipR.MSM5	strong	1.1.1.1.377	Yes	Yes	Present	Absent	Absent	Present	Absent	Absent	Present	Present	Present	Absent	Absent	Present	Present	Present	Present	Present	Present	Present
SRR9273331	2019	M	16 - 60	England	No	N/A	1.1.1.1.377.394.3342	Available	1 and 2	3	SRR9273331			PRJNA315192	3.6.1.1.2	CipR.MSM5	strong	1.1.1.1.377	Yes	Yes	Present	Absent	Absent	Present	Absent	Absent	Present	Present	Present	Absent	Absent	Present	Present	Present	Present	Present	Present	Present
SRR9306495	2019	M	16 - 60	England	Unknown	N/A	1.1.1.1.377.394.3206	Available	1 and 2	4	SRR9306495			PRJNA315192	3.6.1.1.2	CipR.MSM5	strong	1.1.1.1.377	Yes	Yes	Present	Present	Present	Present	Absent	Absent	Present	Present	Present	Present	Present	Present	Present	Present	Present	Present	Present	Present
SRR9311818	2019	M	16 - 60	England	Yes	Europe	1.1.1.1.377.394.3352	Available	1 and 2	4	SRR9311818			PRJNA315192	3.6.1.1.2	CipR.MSM5	strong	1.1.1.1.377	Yes	Yes	Present	Present	Present	Present	Absent	Absent	Present	Present	Present	Present	Present	Present	Present	Present	Present	Present	Present	Present
SRR9335419	2019	M	16 - 60	England	Unknown	N/A	1.1.1.1.377.2053.3263	Available	1 and 2	1	SRR9335419			PRJNA315192	3.6.1.1.2	CipR.MSM5	strong	1.1.1.1.377	Yes	Yes	Present	Present	Present	Present	Absent	Absent	Present	Present	Present	Present	Present	Present	Present	Present	Present	Present	Present	Present
SRR9586539	2019	M	16 - 60	England	Unknown	N/A	1.1.1.1.377.394.3291	Available	1 and 2	3	SRR9586539			PRJNA315192	3.6.1.1.2	CipR.MSM5	strong	1.1.1.1.377	Yes	Yes	Present	Present	Present	Present	Absent	Absent	Present	Present	Present	Present	Present	Present	Present	Present	Present	Present	Present	Present
SRR9586552	2019	M	16 - 60	England	Unknown	N/A	1.1.1.1.377.394.3366	Available	1 and 2	3	SRR9586552			PRJNA315192	3.6.1.1.2	CipR.MSM5	strong	1.1.1.1.377	Yes	Yes	Present	Absent	Absent	Present	Absent	Absent	Present	Present	Present	Absent	Absent	Present	Present	Present	Present	Present	Present	Present
SRR9595020	2019	M	16 - 60	England	Unknown	N/A	1.1.1.1.377.394.3376	Available	1 and 2	4	SRR9595020			PRJNA315192	3.6.1.1.2	CipR.MSM5	strong	1.1.1.1.377	Yes	Yes	Present	Present	Present	Present	Absent	Absent	Present	Present	Present	Present	Present	Present	Present	Present	Present	Present	Present	Present
SRR9613015	2019	F	16 - 60	England	Unknown	N/A	1.1.1.1.377.1898.3378	Available	1 and 2	3	SRR9613015			PRJNA315192	3.6.1.1.2	CipR.MSM5	strong	1.1.1.1.377	Yes	Yes	Present	Present	Present	Present	Absent	Absent	Present	Present	Present	Present	Present	Present	Present	Present	Present	Present	Present	Present
SRR9613634	2019	M	16 - 60	England	Unknown	N/A	1.1.1.1.377.394.3189	Available	1 and 2	3	SRR9613634			PRJNA315192	3.6.1.1.2	CipR.MSM5	strong	1.1.1.1.377	Yes	Yes	Present	Present	Present	Present	Absent	Absent	Present	Present	Present	Present	Present	Present	Present	Present	Present	Present	Present	Present
SRR9620975	2019	M	16 - 60	England	No	N/A	1.1.1.1.377.2053.3384	Available	1 and 2	1	SRR9620975			PRJNA315192	3.6.1.1.2	CipR.MSM5	strong	1.1.1.1.377	Yes	Yes	Present	Absent	Absent	Present	Absent	Absent	Present	Present	Present	Absent	Absent	Present	Present	Present	Present	Present	Present	Present
SRR9661220	2019	F	16 - 60	England	Unknown	N/A	1.1.1.1.377.394.3366	Available	1 and 2	3	SRR9661220			PRJNA315192	3.6.1.1.2	CipR.MSM5	strong	1.1.1.1.377	Yes	Yes	Present	Absent	Absent	Present	Absent	Absent	Present	Present	Present	Absent	Absent	Present	Present	Present	Present	Present	Present	Present
SRR9671847	2019	M	16 - 60	England	No	N/A	1.1.1.1.377.394.3291	Available	1 and 2	3	SRR9671847			PRJNA315192	3.6.1.1.2	CipR.MSM5	strong	1.1.1.1.377	Yes	Yes	Present	Present	Present	Present	Absent	Absent	Present	Present	Present	Present	Present	Present	Present	Present	Present	Present	Present	Present
SRR9678250	2019	M	16 - 60	England	No	N/A	1.1.1.1.377.2053.3389	Available	1 and 2	1	SRR9678250			PRJNA315192	3.6.1.1.2	CipR.MSM5	strong	1.1.1.1.377	Yes	Yes	Present	Present	Present	Present	Absent	Absent	Present	Present	Present	Present	Present	Present	Present	Present	Present	Present	Present	Present
SRR9719290	2019	M	16 - 60	England	Unknown	N/A	1.1.1.1.377.394.3189	Available	1 and 2	3	SRR9719290			PRJNA315192	3.6.1.1.2	CipR.MSM5	strong	1.1.1.1.377	Yes	Yes	Present	Present	Present	Present	Absent	Absent	Present	Present	Present	Present	Present	Present	Present	Present	Present	Present	Present	Present
SRR9720384	2019	M	> 60	England	Unknown	N/A	1.1.1.1.377.2160.3397	Available	1 and 2	1	SRR9720384			PRJNA315192	3.6.1.1.2	CipR.MSM5	strong	1.1.1.1.377	Yes	Yes	Present	Present	Present	Present	Absent	Absent	Present	Present	Present	Present	Present	Present	Present	Present	Present	Present	Present	Present
SRR9720393	2019	M	16 - 60	England	Unknown	N/A	1.1.1.1.377.2158.3394	Available	1 and 2	4	SRR9720393			PRJNA315192	3.6.1.1.2	CipR.MSM5	strong	1.1.1.1.377	Yes	Yes	Present	Present	Present	Present	Absent	Absent	Present	Present	Present	Present	Present	Present	Present	Present	Present	Present	Present	Present
SRR9836885	2019	M	16 - 60	England	Yes	Asia	1.1.1.1.377.394.3406	Available	1 and 2	4	SRR9836885			PRJNA315192	3.6.1.1.2	CipR.MSM5	strong	1.1.1.1.377	Yes	Yes	Absent	Present	Present	Absent	Absent	Absent	Absent	Present	Present	Present	Present	Present	Present	Present	Absent	Present	Present	Present
SRR9836903	2019	M	16 - 60	England	Unknown	N/A	1.1.1.1.377.2165.3404	Available	1 and 2	1	SRR9836903			PRJNA315192	3.6.1.1.2	CipR.MSM5	strong	1.1.1.1.377	Yes	Yes	Present	Present	Present	Present	Absent	Absent	Present	Present	Present	Present	Present	Present	Present	Present	Present	Present	Present	Present
SRR9845577	2019	M	16 - 60	England	Unknown	N/A	1.1.1.1.377.394.3409	Available	1 and 2	4	SRR9845577			PRJNA315192	3.6.1.1.2	CipR.MSM5	strong	1.1.1.1.377	Yes	Yes	Present	Present	Present	Present	Absent	Absent	Present	Present	Present	Present	Present	Present	Present	Present	Present	Present	Present	Present
SRR9845578	2019	M	16 - 60	England	Unknown	N/A	1.1.1.1.377.394.3408	Available	1 and 2	4	SRR9845578			PRJNA315192	3.6.1.1.2	CipR.MSM5	strong	1.1.1.1.377	Yes	Yes	Present	Present	Present	Present	Absent	Absent	Present	Present	Present	Present	Present	Present	Present	Present	Present	Present	Present	Present
SRR9874811	2019	M	16 - 60	England	No	N/A	1.1.1.1.377.394.3414	Available	1 and 2	1	SRR9874811			PRJNA315192	3.6.1.1.2	CipR.MSM5	strong	1.1.1.1.377	Yes	Yes	Present	Present	Present	Present	Absent	Absent	Present	Present	Present	Present	Present	Present	Present	Present	Present	Present	Present	Present
SRR9886061	2019	M	< 16	England	No	N/A	1.1.1.1.377.1898.3422	Available	1 and 2	3	SRR9886061			PRJNA315192	3.6.1.1.2	CipR.MSM5	strong	1.1.1.1.377	Yes	Yes	Present	Present	Present	Present	Absent	Absent	Present	Present	Present	Present	Present	Present	Present	Present	Present	Present	Present	Present
SRR9899922	2019	M	16 - 60	England	Unknown	N/A	1.1.1.1.377.2053.3424	Available	1 and 2	1	SRR9899922			PRJNA315192	3.6.1.1.2	CipR.MSM5	strong	1.1.1.1.377	Yes	Yes	Present	Present	Present	Present	Absent	Absent	Present	Present	Present	Present	Present	Present	Present	Present	Present	Present	Present	Present
SRR9944900	2019	M	16 - 60	England	Unknown	N/A	1.1.1.1.377.2181.3434	Available	1 and 2	3	SRR9944900			PRJNA315192	3.6.1.1.2	CipR.MSM5	strong	1.1.1.1.377	Yes	Yes	Present	Present	Present	Present	Absent	Absent	Present	Present	Present	Present	Present	Present	Present	Present	Present	Present	Present	Present
SRR9961604	2019	M	16 - 60	England	Unknown	N/A	1.1.1.1.377.2053.3263	Available	1 and 2	1	SRR9961604			PRJNA315192	3.6.1.1.2	CipR.MSM5	strong	1.1.1.1.377	Yes	Yes	Present	Present	Present	Present	Absent	Absent	Present	Present	Present	Present	Present	Present	Present	Present	Present	Present	Present	Present
SRR3531917	2016	M	16 - 60	England	Unknown	N/A	1.1.1.1.546.602.806	Available	1		SRR3531917			PRJNA315192	3.6.1.1.2	CipR.MSM5	strong	1.1.1.1.546	No	Yes
SRR3742261	2016	M	16 - 60	England	Unknown	N/A	1.1.1.1.546.602.858	Available	1		SRR3742261			PRJNA315192	3.6.1.1.2	CipR.MSM5	strong	1.1.1.1.546	No	Yes
SRR4787852	2016	M	16 - 60	England	Unknown	N/A	1.1.1.1.546.602.951	Available	1		SRR4787852			PRJNA315192	3.6.1.1.2	CipR.MSM5	strong	1.1.1.1.546	No	Yes
SRR4788074	2016	M	16 - 60	England	Unknown	N/A	1.1.1.1.546.602.1048	Available	1		SRR4788074			PRJNA315192	3.6.1.1.2	CipR.MSM5	strong	1.1.1.1.546	No	Yes
SRR4897131	2016	M	16 - 60	England	No	N/A	1.1.1.1.546.602.795	Available	1		SRR4897131			PRJNA315192	3.6.1.1.2	CipR.MSM5	strong	1.1.1.1.546	No	Yes
SRR4897179	2016	M	16 - 60	England	Unknown	N/A	1.1.1.1.546.602.858	Available	1		SRR4897179			PRJNA315192	3.6.1.1.2	CipR.MSM5	strong	1.1.1.1.546	No	Yes
SRR4897357	2016	M	16 - 60	England	Yes	Unknown	1.1.1.1.546.602.795	Available	1		SRR4897357			PRJNA315192	3.6.1.1.2	CipR.MSM5	strong	1.1.1.1.546	No	Yes
SRR4897770	2016	M	16 - 60	England	Unknown	N/A	1.1.1.1.546.602.853	Available	1		SRR4897770			PRJNA315192	3.6.1.1.2	CipR.MSM5	strong	1.1.1.1.546	No	Yes
SRR5005282	2016	M	16 - 60	England	Unknown	N/A	1.1.1.1.546.602.858	Available	1		SRR5005282			PRJNA315192	3.6.1.1.2	CipR.MSM5	strong	1.1.1.1.546	No	Yes
SRR5005348	2016	M	16 - 60	England	No	N/A	1.1.1.1.546.602.858	Available	1		SRR5005348			PRJNA315192	3.6.1.1.2	CipR.MSM5	strong	1.1.1.1.546	No	Yes
SRR5005563	2016	M	16 - 60	England	No	N/A	1.1.1.1.546.602.886	Available	1		SRR5005563			PRJNA315192	3.6.1.1.2	CipR.MSM5	strong	1.1.1.1.546	No	Yes
SRR5006358	2016	M	16 - 60	England	No	N/A	1.1.1.1.546.602.938	Available	1		SRR5006358			PRJNA315192	3.6.1.1.2	CipR.MSM5	strong	1.1.1.1.546	No	Yes
SRR5024080	2016	M	16 - 60	England	Unknown	N/A	1.1.1.1.546.602.795	Available	1		SRR5024080			PRJNA315192	3.6.1.1.2	CipR.MSM5	strong	1.1.1.1.546	No	Yes
SRR5024231	2016	M	16 - 60	England	No	N/A	1.1.1.1.546.602.858	Available	1		SRR5024231			PRJNA315192	3.6.1.1.2	CipR.MSM5	strong	1.1.1.1.546	No	Yes
SRR6467515	2016	F	16 - 60	England	No	N/A	1.1.1.1.546.602.945	Available	1		SRR6467515			PRJNA315192	3.6.1.1.2	CipR.MSM5	strong	1.1.1.1.546	No	Yes
SRR7191685	2017	M	> 60	England	Unknown	N/A	1.1.1.1.546.602.2048	Available	1		SRR7191685			PRJNA315192	3.6.1.1.2	CipR.MSM5	strong	1.1.1.1.546	No	Yes
SRR7215947	2017	M	16 - 60	England	Unknown	N/A	1.1.1.1.546.602.2048	Available	1		SRR7215947			PRJNA315192	3.6.1.1.2	CipR.MSM5	strong	1.1.1.1.546	No	Yes
SRR7221234	2017	M	16 - 60	England	Unknown	N/A	1.1.1.1.546.602.1795	Available	1		SRR7221234			PRJNA315192	3.6.1.1.2	CipR.MSM5	strong	1.1.1.1.546	No	Yes
SRR7221276	2017	M	16 - 60	England	No	N/A	1.1.1.1.546.1286.1726	Available	1		SRR7221276			PRJNA315192	3.6.1.1.2	CipR.MSM5	strong	1.1.1.1.546	No	Yes
SRR7230233	2017	M	16 - 60	England	Unknown	N/A	1.1.1.1.546.602.1729	Available	1		SRR7230233			PRJNA315192	3.6.1.1.2	CipR.MSM5	strong	1.1.1.1.546	No	Yes
SRR7251031	2016	M	16 - 60	England	Yes	Europe	1.1.1.1.546.602.858	Available	1		SRR7251031			PRJNA315192	3.6.1.1.2	CipR.MSM5	strong	1.1.1.1.546	No	Yes
SRR7266809	2017	F	16 - 60	England	Unknown	N/A	1.1.1.1.546.602.1795	Available	1		SRR7266809			PRJNA315192	3.6.1.1.2	CipR.MSM5	strong	1.1.1.1.546	No	Yes
SRR7282632	2017	Unknown	16 - 60	England	No	N/A	1.1.1.1.546.602.1608	Available	1		SRR7282632			PRJNA315192	3.6.1.1.2	CipR.MSM5	strong	1.1.1.1.546	No	Yes
SRR7291586	2017	M	16 - 60	England	Unknown	N/A	1.1.1.1.546.602.1795	Available	1		SRR7291586			PRJNA315192	3.6.1.1.2	CipR.MSM5	strong	1.1.1.1.546	No	Yes
SRR7358269	2017	M	16 - 60	England	No	N/A	1.1.1.1.546.602.1720	Available	1		SRR7358269			PRJNA315192	3.6.1.1.2	CipR.MSM5	strong	1.1.1.1.546	No	Yes
SRR7266766	2017	M	16 - 60	England	No	N/A	1.1.371.748.1230.1409.1938	Available	1		SRR7266766			PRJNA315192	3.6.1.1.2	CipR.MSM5	strong	1.1.371.748.1230	No	Yes
SRR7886015	Ref	Ref	Ref	Ref	Ref	Ref	Ref	Available	1		SRR7886015				3.7.29.1.2.1	Global III VN2.MSM2.Aus	strong	Ref....		No
17-001-0020	2017	224 SAMPLES MALE, 8 FEMALE	AVERAGE 40 [19 - 83]	Australia (NSW)	Unknown	N/A	N/A	N/A	None		PENDING			PRJNA613115	3.6.1.1.2	CipR.MSM5	Strong			Yes
17-001-0021	2017	224 SAMPLES MALE, 8 FEMALE	AVERAGE 40 [19 - 83]	Australia (NSW)	Unknown	N/A	N/A	N/A	2	1	PENDING			PRJNA613115	3.6.1.1.2	CipR.MSM5	strong			Yes	Present	Present	Present	Present	Absent	Absent	Present	Present	Present	Present	Present	Present	Present	Present	Present	Present	Present	Present
17-001-0031	2017	224 SAMPLES MALE, 8 FEMALE	AVERAGE 40 [19 - 83]	Australia (NSW)	Unknown	N/A	N/A	N/A	2	1	PENDING			PRJNA613115	3.6.1.1.2	CipR.MSM5	strong			Yes	Present	Present	Present	Present	Absent	Absent	Present	Present	Present	Present	Present	Present	Present	Present	Present	Present	Present	Present
17-001-0041	2017	224 SAMPLES MALE, 8 FEMALE	AVERAGE 40 [19 - 83]	Australia (NSW)	Unknown	N/A	N/A	N/A	2	2	PENDING			PRJNA613115	3.6.1.1.2	CipR.MSM5	strong			Yes	Present	Present	Present	Present	Absent	Absent	Present	Present	Present	Present	Present	Present	Present	Present	Present	Present	Present	Present
17-001-0047	2017	224 SAMPLES MALE, 8 FEMALE	AVERAGE 40 [19 - 83]	Australia (NSW)	Unknown	N/A	N/A	N/A	2	2	PENDING			PRJNA613115	3.6.1.1.2	CipR.MSM5	strong			Yes	Present	Present	Present	Absent	Present	Absent	Present	Present	Present	Present	Present	Present	Present	Present	Present	Present	Present	Present
17-001-0066	2017	224 SAMPLES MALE, 8 FEMALE	AVERAGE 40 [19 - 83]	Australia (NSW)	Unknown	N/A	N/A	N/A	2	2	PENDING			PRJNA613115	3.6.1.1.2	CipR.MSM5	strong			Yes	Present	Present	Present	Present	Absent	Absent	Present	Present	Present	Present	Present	Present	Present	Present	Present	Present	Present	Present
18-001-0002	2018	224 SAMPLES MALE, 8 FEMALE	AVERAGE 40 [19 - 83]	Australia (NSW)	Unknown	N/A	N/A	N/A	2	2	PENDING			PRJNA613115	3.6.1.1.2	CipR.MSM5	strong			Yes	Present	Present	Present	Present	Absent	Absent	Present	Present	Present	Present	Present	Present	Present	Present	Present	Present	Present	Present
18-001-0006	2018	224 SAMPLES MALE, 8 FEMALE	AVERAGE 40 [19 - 83]	Australia (NSW)	Unknown	N/A	N/A	N/A	2	3	PENDING			PRJNA613115	3.6.1.1.2	CipR.MSM5	strong			Yes	Present	Present	Present	Present	Absent	Absent	Present	Present	Present	Present	Present	Present	Present	Present	Present	Present	Present	Present
18-001-0007	2018	224 SAMPLES MALE, 8 FEMALE	AVERAGE 40 [19 - 83]	Australia (NSW)	Unknown	N/A	N/A	N/A	2	2	PENDING			PRJNA613115	3.6.1.1.2	CipR.MSM5	strong			Yes	Present	Present	Present	Present	Absent	Absent	Present	Present	Present	Present	Present	Present	Present	Present	Present	Present	Present	Present
18-001-0018	2018	224 SAMPLES MALE, 8 FEMALE	AVERAGE 40 [19 - 83]	Australia (NSW)	Unknown	N/A	N/A	N/A	2	3	PENDING			PRJNA613115	3.6.1.1.2	CipR.MSM5	strong			Yes	Present	Present	Present	Present	Absent	Absent	Present	Present	Present	Present	Present	Present	Present	Present	Present	Present	Present	Present
18-001-0020	2018	224 SAMPLES MALE, 8 FEMALE	AVERAGE 40 [19 - 83]	Australia (NSW)	Unknown	N/A	N/A	N/A	2	2	PENDING			PRJNA613115	3.6.1.1.2	CipR.MSM5	strong			Yes	Present	Present	Present	Present	Absent	Absent	Present	Present	Present	Present	Present	Present	Present	Present	Present	Present	Present	Present
18-001-0021	2018	224 SAMPLES MALE, 8 FEMALE	AVERAGE 40 [19 - 83]	Australia (NSW)	Unknown	N/A	N/A	N/A	2	2	PENDING			PRJNA613115	3.6.1.1.2	CipR.MSM5	strong			Yes	Present	Present	Present	Present	Absent	Absent	Present	Present	Present	Present	Present	Present	Present	Present	Present	Present	Present	Present
18-001-0022	2018	224 SAMPLES MALE, 8 FEMALE	AVERAGE 40 [19 - 83]	Australia (NSW)	Unknown	N/A	N/A	N/A	2	2	PENDING			PRJNA613115	3.6.1.1.2	CipR.MSM5	strong			Yes	Present	Present	Present	Present	Absent	Absent	Present	Present	Present	Present	Present	Present	Present	Present	Present	Present	Present	Present
18-001-0024	2018	224 SAMPLES MALE, 8 FEMALE	AVERAGE 40 [19 - 83]	Australia (NSW)	Unknown	N/A	N/A	N/A	2	2	PENDING			PRJNA613115	3.6.1.1.2	CipR.MSM5	strong			Yes	Present	Present	Present	Present	Absent	Absent	Present	Present	Present	Present	Present	Present	Present	Present	Present	Present	Present	Present
18-001-0027	2018	224 SAMPLES MALE, 8 FEMALE	AVERAGE 40 [19 - 83]	Australia (NSW)	Unknown	N/A	N/A	N/A	2	2	PENDING			PRJNA613115	3.6.1.1.2	CipR.MSM5	strong			Yes	Present	Present	Present	Present	Absent	Absent	Present	Present	Present	Present	Present	Present	Present	Present	Present	Present	Present	Present
18-001-0032	2018	224 SAMPLES MALE, 8 FEMALE	AVERAGE 40 [19 - 83]	Australia (NSW)	Unknown	N/A	N/A	N/A	2	3	PENDING			PRJNA613115	3.6.1.1.2	CipR.MSM5	strong			Yes	Present	Absent	Absent	Present	Absent	Absent	Present	Present	Present	Absent	Absent	Present	Present	Present	Present	Present	Present	Present
18-001-0034	2018	224 SAMPLES MALE, 8 FEMALE	AVERAGE 40 [19 - 83]	Australia (NSW)	Unknown	N/A	N/A	N/A	2	2	PENDING			PRJNA613115	3.6.1.1.2	CipR.MSM5	strong			Yes	Present	Present	Present	Present	Absent	Absent	Present	Present	Present	Present	Present	Present	Present	Present	Present	Present	Present	Present
18-001-0036	2018	224 SAMPLES MALE, 8 FEMALE	AVERAGE 40 [19 - 83]	Australia (NSW)	Unknown	N/A	N/A	N/A	2	1	PENDING			PRJNA613115	3.6.1.1.2	CipR.MSM5	strong			Yes	Present	Present	Present	Present	Absent	Absent	Present	Present	Present	Present	Present	Present	Present	Present	Present	Present	Present	Present
18-001-0038	2018	224 SAMPLES MALE, 8 FEMALE	AVERAGE 40 [19 - 83]	Australia (NSW)	Unknown	N/A	N/A	N/A	2	3	PENDING			PRJNA613115	3.6.1.1.2	CipR.MSM5	strong			Yes	Present	Present	Present	Present	Absent	Absent	Present	Present	Present	Present	Present	Present	Present	Present	Present	Present	Present	Present
18-001-0040	2018	224 SAMPLES MALE, 8 FEMALE	AVERAGE 40 [19 - 83]	Australia (NSW)	Unknown	N/A	N/A	N/A	2	2	PENDING			PRJNA613115	3.6.1.1.2	CipR.MSM5	strong			Yes	Present	Present	Present	Present	Absent	Absent	Present	Present	Present	Present	Present	Present	Present	Present	Present	Present	Present	Present
18-001-0042	2018	224 SAMPLES MALE, 8 FEMALE	AVERAGE 40 [19 - 83]	Australia (NSW)	Unknown	N/A	N/A	N/A	2	3	PENDING			PRJNA613115	3.6.1.1.2	CipR.MSM5	strong			Yes	Present	Present	Present	Present	Absent	Absent	Present	Present	Present	Present	Present	Present	Present	Present	Present	Present	Present	Present
18-001-0043	2018	224 SAMPLES MALE, 8 FEMALE	AVERAGE 40 [19 - 83]	Australia (NSW)	Unknown	N/A	N/A	N/A	2	1	PENDING			PRJNA613115	3.6.1.1.2	CipR.MSM5	strong			Yes	Present	Present	Present	Present	Absent	Absent	Present	Present	Present	Present	Present	Present	Present	Present	Present	Present	Present	Present
18-001-0044	2018	224 SAMPLES MALE, 8 FEMALE	AVERAGE 40 [19 - 83]	Australia (NSW)	Unknown	N/A	N/A	N/A	2	2	PENDING			PRJNA613115	3.6.1.1.2	CipR.MSM5	strong			Yes	Present	Present	Present	Present	Absent	Absent	Present	Present	Present	Present	Present	Present	Present	Present	Present	Present	Present	Present
18-001-0048	2018	224 SAMPLES MALE, 8 FEMALE	AVERAGE 40 [19 - 83]	Australia (NSW)	Unknown	N/A	N/A	N/A	2	1	PENDING			PRJNA613115	3.6.1.1.2	CipR.MSM5	strong			Yes	Present	Present	Present	Present	Absent	Absent	Present	Present	Present	Present	Present	Present	Present	Present	Present	Present	Present	Present
18-001-0049	2018	224 SAMPLES MALE, 8 FEMALE	AVERAGE 40 [19 - 83]	Australia (NSW)	Unknown	N/A	N/A	N/A	2	1	PENDING			PRJNA613115	3.6.1.1.2	CipR.MSM5	strong			Yes	Present	Present	Present	Present	Absent	Absent	Present	Present	Present	Present	Present	Present	Present	Present	Present	Present	Present	Present
18-001-0053	2018	224 SAMPLES MALE, 8 FEMALE	AVERAGE 40 [19 - 83]	Australia (NSW)	Unknown	N/A	N/A	N/A	2	3	PENDING			PRJNA613115	3.6.1.1.2	CipR.MSM5	strong			Yes	Present	Absent	Absent	Present	Absent	Absent	Present	Present	Present	Absent	Absent	Present	Present	Present	Present	Present	Present	Present
18-001-0057	2018	224 SAMPLES MALE, 8 FEMALE	AVERAGE 40 [19 - 83]	Australia (NSW)	Unknown	N/A	N/A	N/A	2	2	PENDING			PRJNA613115	3.6.1.1.2	CipR.MSM5	strong			Yes	Present	Present	Present	Present	Absent	Absent	Present	Present	Present	Present	Present	Present	Present	Present	Present	Present	Present	Present
18-001-0067	2018	224 SAMPLES MALE, 8 FEMALE	AVERAGE 40 [19 - 83]	Australia (NSW)	Unknown	N/A	N/A	N/A	2	1	PENDING			PRJNA613115	3.6.1.1.2	CipR.MSM5	strong			Yes	Present	Present	Present	Present	Absent	Absent	Present	Present	Present	Present	Present	Present	Present	Present	Present	Present	Present	Present
18-001-0071	2018	224 SAMPLES MALE, 8 FEMALE	AVERAGE 40 [19 - 83]	Australia (NSW)	Unknown	N/A	N/A	N/A	2	1	PENDING			PRJNA613115	3.6.1.1.2	CipR.MSM5	strong			Yes	Present	Present	Present	Present	Absent	Absent	Present	Present	Present	Present	Present	Present	Present	Present	Present	Present	Present	Present
18-001-0073	2018	224 SAMPLES MALE, 8 FEMALE	AVERAGE 40 [19 - 83]	Australia (NSW)	Unknown	N/A	N/A	N/A	2	2	PENDING			PRJNA613115	3.6.1.1.2	CipR.MSM5	strong			Yes	Present	Present	Present	Present	Absent	Absent	Present	Present	Present	Present	Present	Present	Present	Present	Present	Present	Present	Present
18-001-0075	2018	224 SAMPLES MALE, 8 FEMALE	AVERAGE 40 [19 - 83]	Australia (NSW)	Unknown	N/A	N/A	N/A	2	1	PENDING			PRJNA613115	3.6.1.1.2	CipR.MSM5	strong			Yes	Present	Present	Present	Present	Absent	Absent	Present	Present	Present	Present	Present	Present	Present	Present	Present	Present	Present	Present
18-001-0079	2018	224 SAMPLES MALE, 8 FEMALE	AVERAGE 40 [19 - 83]	Australia (NSW)	Unknown	N/A	N/A	N/A	2	3	PENDING			PRJNA613115	3.6.1.1.2	CipR.MSM5	strong			Yes	Present	Present	Present	Present	Absent	Absent	Present	Present	Present	Present	Present	Present	Present	Present	Present	Present	Present	Present
18-001-0086	2018	224 SAMPLES MALE, 8 FEMALE	AVERAGE 40 [19 - 83]	Australia (NSW)	Unknown	N/A	N/A	N/A	2	2	PENDING			PRJNA613115	3.6.1.1.2	CipR.MSM5	strong			Yes	Present	Present	Present	Present	Absent	Absent	Present	Present	Present	Present	Present	Present	Present	Present	Present	Present	Present	Present
18-001-0088	2018	224 SAMPLES MALE, 8 FEMALE	AVERAGE 40 [19 - 83]	Australia (NSW)	Unknown	N/A	N/A	N/A	2	3	PENDING			PRJNA613115	3.6.1.1.2	CipR.MSM5	strong			Yes	Present	Present	Present	Present	Absent	Absent	Present	Present	Present	Present	Present	Present	Present	Present	Present	Present	Present	Present
18-001-0090	2018	224 SAMPLES MALE, 8 FEMALE	AVERAGE 40 [19 - 83]	Australia (NSW)	Unknown	N/A	N/A	N/A	2	2	PENDING			PRJNA613115	3.6.1.1.2	CipR.MSM5	strong			Yes	Present	Present	Present	Present	Absent	Absent	Present	Present	Present	Present	Present	Present	Present	Present	Present	Present	Present	Present
18-001-0093	2018	224 SAMPLES MALE, 8 FEMALE	AVERAGE 40 [19 - 83]	Australia (NSW)	Unknown	N/A	N/A	N/A	2	3	PENDING			PRJNA613115	3.6.1.1.2	CipR.MSM5	strong			Yes	Present	Present	Present	Present	Absent	Absent	Present	Present	Present	Present	Present	Present	Present	Present	Present	Present	Present	Present
18-001-0095	2018	224 SAMPLES MALE, 8 FEMALE	AVERAGE 40 [19 - 83]	Australia (NSW)	Unknown	N/A	N/A	N/A	2	1	PENDING			PRJNA613115	3.6.1.1.2	CipR.MSM5	strong			Yes	Present	Present	Present	Present	Absent	Absent	Present	Present	Present	Present	Present	Present	Present	Present	Present	Present	Present	Present
18-001-0100	2018	224 SAMPLES MALE, 8 FEMALE	AVERAGE 40 [19 - 83]	Australia (NSW)	Unknown	N/A	N/A	N/A	2	3	PENDING			PRJNA613115	3.6.1.1.2	CipR.MSM5	strong			Yes	Present	Present	Present	Present	Absent	Absent	Present	Present	Present	Present	Present	Present	Present	Present	Present	Present	Present	Present
18-001-0101	2018	224 SAMPLES MALE, 8 FEMALE	AVERAGE 40 [19 - 83]	Australia (NSW)	Unknown	N/A	N/A	N/A	2	3	PENDING			PRJNA613115	3.6.1.1.2	CipR.MSM5	strong			Yes	Present	Present	Present	Present	Absent	Absent	Present	Present	Present	Present	Present	Present	Present	Present	Present	Present	Present	Present
18-001-0103	2018	224 SAMPLES MALE, 8 FEMALE	AVERAGE 40 [19 - 83]	Australia (NSW)	Unknown	N/A	N/A	N/A	None		PENDING			PRJNA613115	3.6.1.1.2	CipR.MSM5	Strong			Yes
18-001-0106	2018	224 SAMPLES MALE, 8 FEMALE	AVERAGE 40 [19 - 83]	Australia (NSW)	Unknown	N/A	N/A	N/A	2	2	PENDING			PRJNA613115	3.6.1.1.2	CipR.MSM5	strong			Yes	Present	Present	Present	Present	Absent	Absent	Present	Present	Present	Present	Present	Present	Present	Present	Present	Present	Present	Present
18-001-0107	2018	224 SAMPLES MALE, 8 FEMALE	AVERAGE 40 [19 - 83]	Australia (NSW)	Unknown	N/A	N/A	N/A	2	3	PENDING			PRJNA613115	3.6.1.1.2	CipR.MSM5	strong			Yes	Present	Present	Present	Present	Absent	Absent	Present	Present	Present	Present	Present	Present	Present	Present	Present	Present	Present	Present
18-001-0108	2018	224 SAMPLES MALE, 8 FEMALE	AVERAGE 40 [19 - 83]	Australia (NSW)	Unknown	N/A	N/A	N/A	2	3	PENDING			PRJNA613115	3.6.1.1.2	CipR.MSM5	strong			Yes	Present	Present	Present	Present	Absent	Absent	Present	Present	Present	Present	Present	Present	Present	Present	Present	Present	Present	Present
18-001-0110	2018	224 SAMPLES MALE, 8 FEMALE	AVERAGE 40 [19 - 83]	Australia (NSW)	Unknown	N/A	N/A	N/A	2	3	PENDING			PRJNA613115	3.6.1.1.2	CipR.MSM5	strong			Yes	Present	Present	Present	Present	Absent	Absent	Present	Present	Present	Present	Present	Present	Present	Present	Present	Present	Present	Present
18-001-0111	2018	224 SAMPLES MALE, 8 FEMALE	AVERAGE 40 [19 - 83]	Australia (NSW)	Unknown	N/A	N/A	N/A	2	3	PENDING			PRJNA613115	3.6.1.1.2	CipR.MSM5	strong			Yes	Present	Present	Present	Present	Absent	Absent	Present	Present	Present	Present	Present	Present	Present	Present	Present	Present	Present	Present
18-001-0112	2018	224 SAMPLES MALE, 8 FEMALE	AVERAGE 40 [19 - 83]	Australia (NSW)	Unknown	N/A	N/A	N/A	2	3	PENDING			PRJNA613115	3.6.1.1.2	CipR.MSM5	strong			Yes	Present	Present	Present	Present	Absent	Absent	Present	Present	Present	Present	Present	Present	Present	Present	Present	Present	Present	Present
18-001-0114	2018	224 SAMPLES MALE, 8 FEMALE	AVERAGE 40 [19 - 83]	Australia (NSW)	Unknown	N/A	N/A	N/A	2	3	PENDING			PRJNA613115	3.6.1.1.2	CipR.MSM5	strong			Yes	Present	Absent	Absent	Present	Absent	Absent	Present	Present	Present	Absent	Absent	Present	Present	Present	Present	Present	Present	Present
18-001-0115	2018	224 SAMPLES MALE, 8 FEMALE	AVERAGE 40 [19 - 83]	Australia (NSW)	Unknown	N/A	N/A	N/A	2	3	PENDING			PRJNA613115	3.6.1.1.2	CipR.MSM5	strong			Yes	Present	Present	Present	Present	Absent	Absent	Present	Present	Present	Present	Present	Present	Present	Present	Present	Present	Present	Present
18-001-0116	2018	224 SAMPLES MALE, 8 FEMALE	AVERAGE 40 [19 - 83]	Australia (NSW)	Unknown	N/A	N/A	N/A	2	4	PENDING			PRJNA613115	3.6.1.1.2	CipR.MSM5	strong			Yes	Present	Present	Present	Present	Absent	Absent	Present	Present	Present	Present	Present	Present	Present	Present	Present	Present	Present	Present
18-001-0119	2018	224 SAMPLES MALE, 8 FEMALE	AVERAGE 40 [19 - 83]	Australia (NSW)	Unknown	N/A	N/A	N/A	2	3	PENDING			PRJNA613115	3.6.1.1.2	CipR.MSM5	strong			Yes	Present	Present	Present	Present	Absent	Absent	Present	Present	Present	Present	Present	Present	Present	Present	Present	Present	Present	Present
18-001-0120	2018	224 SAMPLES MALE, 8 FEMALE	AVERAGE 40 [19 - 83]	Australia (NSW)	Unknown	N/A	N/A	N/A	2	3	PENDING			PRJNA613115	3.6.1.1.2	CipR.MSM5	strong			Yes	Present	Present	Present	Present	Absent	Absent	Present	Present	Present	Present	Present	Present	Present	Present	Present	Present	Present	Present
18-001-0121	2018	224 SAMPLES MALE, 8 FEMALE	AVERAGE 40 [19 - 83]	Australia (NSW)	Unknown	N/A	N/A	N/A	2	3	PENDING			PRJNA613115	3.6.1.1.2	CipR.MSM5	strong			Yes	Present	Present	Present	Present	Absent	Absent	Present	Present	Present	Present	Present	Present	Present	Present	Present	Present	Present	Present
18-001-0123	2018	224 SAMPLES MALE, 8 FEMALE	AVERAGE 40 [19 - 83]	Australia (NSW)	Unknown	N/A	N/A	N/A	2	3	PENDING			PRJNA613115	3.6.1.1.2	CipR.MSM5	strong			Yes	Present	Present	Present	Present	Absent	Absent	Present	Present	Present	Present	Present	Present	Present	Present	Present	Present	Present	Present
18-001-0125	2018	224 SAMPLES MALE, 8 FEMALE	AVERAGE 40 [19 - 83]	Australia (NSW)	Unknown	N/A	N/A	N/A	2	3	PENDING			PRJNA613115	3.6.1.1.2	CipR.MSM5	strong			Yes	Present	Present	Present	Present	Absent	Absent	Present	Present	Present	Present	Present	Present	Present	Present	Present	Present	Present	Present
18-001-0126	2018	224 SAMPLES MALE, 8 FEMALE	AVERAGE 40 [19 - 83]	Australia (NSW)	Unknown	N/A	N/A	N/A	2	3	PENDING			PRJNA613115	3.6.1.1.2	CipR.MSM5	strong			Yes	Present	Present	Present	Present	Absent	Absent	Present	Present	Present	Present	Present	Present	Present	Present	Present	Present	Present	Present
18-001-0127	2018	224 SAMPLES MALE, 8 FEMALE	AVERAGE 40 [19 - 83]	Australia (NSW)	Unknown	N/A	N/A	N/A	2	3	PENDING			PRJNA613115	3.6.1.1.2	CipR.MSM5	strong			Yes	Present	Present	Present	Present	Absent	Absent	Present	Present	Present	Present	Present	Present	Present	Present	Present	Present	Present	Present
18-001-0128	2018	224 SAMPLES MALE, 8 FEMALE	AVERAGE 40 [19 - 83]	Australia (NSW)	Unknown	N/A	N/A	N/A	2	3	PENDING			PRJNA613115	3.6.1.1.2	CipR.MSM5	strong			Yes	Present	Present	Present	Present	Absent	Absent	Present	Present	Present	Present	Present	Present	Present	Present	Present	Present	Present	Present
18-001-0130	2018	224 SAMPLES MALE, 8 FEMALE	AVERAGE 40 [19 - 83]	Australia (NSW)	Unknown	N/A	N/A	N/A	2	3	PENDING			PRJNA613115	3.6.1.1.2	CipR.MSM5	strong			Yes	Present	Present	Present	Present	Absent	Absent	Present	Present	Present	Present	Present	Present	Present	Present	Present	Present	Present	Present
18-001-0131	2018	224 SAMPLES MALE, 8 FEMALE	AVERAGE 40 [19 - 83]	Australia (NSW)	Unknown	N/A	N/A	N/A	2	1	PENDING			PRJNA613115	3.6.1.1.2	CipR.MSM5	strong			Yes	Present	Present	Present	Present	Absent	Absent	Present	Present	Present	Present	Present	Present	Present	Present	Present	Present	Present	Present
18-001-0134	2018	224 SAMPLES MALE, 8 FEMALE	AVERAGE 40 [19 - 83]	Australia (NSW)	Unknown	N/A	N/A	N/A	2	3	PENDING			PRJNA613115	3.6.1.1.2	CipR.MSM5	strong			Yes	Present	Present	Present	Present	Absent	Absent	Present	Present	Present	Present	Present	Present	Present	Present	Present	Present	Present	Present
18-001-0135	2018	224 SAMPLES MALE, 8 FEMALE	AVERAGE 40 [19 - 83]	Australia (NSW)	Unknown	N/A	N/A	N/A	2	3	PENDING			PRJNA613115	3.6.1.1.2	CipR.MSM5	strong			Yes	Present	Present	Present	Present	Absent	Absent	Present	Present	Present	Present	Present	Present	Present	Present	Present	Present	Present	Present
18-001-0136	2018	224 SAMPLES MALE, 8 FEMALE	AVERAGE 40 [19 - 83]	Australia (NSW)	Unknown	N/A	N/A	N/A	2	3	PENDING			PRJNA613115	3.6.1.1.2	CipR.MSM5	strong			Yes	Present	Present	Present	Present	Absent	Absent	Present	Present	Present	Present	Present	Present	Present	Present	Present	Present	Present	Present
18-001-0139	2018	224 SAMPLES MALE, 8 FEMALE	AVERAGE 40 [19 - 83]	Australia (NSW)	Unknown	N/A	N/A	N/A	2	3	PENDING			PRJNA613115	3.6.1.1.2	CipR.MSM5	strong			Yes	Present	Present	Present	Present	Absent	Absent	Present	Present	Present	Present	Present	Present	Present	Present	Present	Present	Present	Present
18-001-0145	2018	224 SAMPLES MALE, 8 FEMALE	AVERAGE 40 [19 - 83]	Australia (NSW)	Unknown	N/A	N/A	N/A	2	3	PENDING			PRJNA613115	3.6.1.1.2	CipR.MSM5	strong			Yes	Present	Present	Present	Present	Absent	Absent	Present	Present	Present	Present	Present	Present	Present	Present	Present	Present	Present	Present
18-001-0146	2018	224 SAMPLES MALE, 8 FEMALE	AVERAGE 40 [19 - 83]	Australia (NSW)	Unknown	N/A	N/A	N/A	2	3	PENDING			PRJNA613115	3.6.1.1.2	CipR.MSM5	strong			Yes	Present	Absent	Absent	Present	Absent	Absent	Present	Present	Present	Absent	Absent	Present	Present	Present	Present	Present	Present	Present
18-001-0147	2018	224 SAMPLES MALE, 8 FEMALE	AVERAGE 40 [19 - 83]	Australia (NSW)	Unknown	N/A	N/A	N/A	2	2	PENDING			PRJNA613115	3.6.1.1.2	CipR.MSM5	strong			Yes	Present	Present	Present	Present	Absent	Absent	Present	Present	Present	Present	Present	Present	Present	Present	Present	Present	Present	Present
18-001-0148	2018	224 SAMPLES MALE, 8 FEMALE	AVERAGE 40 [19 - 83]	Australia (NSW)	Unknown	N/A	N/A	N/A	2	1	PENDING			PRJNA613115	3.6.1.1.2	CipR.MSM5	strong			Yes	Present	Present	Present	Present	Absent	Absent	Present	Present	Present	Present	Present	Present	Present	Present	Present	Present	Present	Present
18-0624-0001	2017	224 SAMPLES MALE, 8 FEMALE	AVERAGE 40 [19 - 83]	Australia (NSW)	Unknown	N/A	N/A	N/A	2	2	PENDING			PRJNA613115	3.6.1.1.2	CipR.MSM5	strong			Yes	Present	Present	Present	Present	Absent	Absent	Present	Present	Present	Present	Present	Present	Present	Present	Present	Present	Present	Present
18-0624-0004	2017	224 SAMPLES MALE, 8 FEMALE	AVERAGE 40 [19 - 83]	Australia (NSW)	Unknown	N/A	N/A	N/A	2	3	PENDING			PRJNA613115	3.6.1.1.2	CipR.MSM5	strong			Yes	Present	Present	Present	Present	Absent	Absent	Present	Present	Present	Present	Present	Present	Present	Present	Present	Present	Present	Present
18-0624-0007	2017	224 SAMPLES MALE, 8 FEMALE	AVERAGE 40 [19 - 83]	Australia (NSW)	Unknown	N/A	N/A	N/A	2	3	PENDING			PRJNA613115	3.6.1.1.2	CipR.MSM5	strong			Yes	Present	Present	Present	Present	Absent	Absent	Present	Present	Present	Present	Present	Present	Present	Present	Present	Present	Present	Present
18-0624-0008	2017	224 SAMPLES MALE, 8 FEMALE	AVERAGE 40 [19 - 83]	Australia (NSW)	Unknown	N/A	N/A	N/A	2	2	PENDING			PRJNA613115	3.6.1.1.2	CipR.MSM5	strong			Yes	Present	Present	Present	Present	Absent	Absent	Present	Present	Present	Present	Present	Present	Present	Present	Present	Present	Present	Present
18-0624-0009	2017	224 SAMPLES MALE, 8 FEMALE	AVERAGE 40 [19 - 83]	Australia (NSW)	Unknown	N/A	N/A	N/A	2	3	PENDING			PRJNA613115	3.6.1.1.2	CipR.MSM5	strong			Yes	Present	Present	Present	Present	Absent	Absent	Present	Present	Present	Present	Present	Present	Present	Present	Present	Present	Present	Present
18-0624-0011	2017	224 SAMPLES MALE, 8 FEMALE	AVERAGE 40 [19 - 83]	Australia (NSW)	Unknown	N/A	N/A	N/A	2	2	PENDING			PRJNA613115	3.6.1.1.2	CipR.MSM5	strong			Yes	Present	Present	Present	Present	Absent	Absent	Present	Present	Present	Present	Present	Present	Present	Present	Present	Present	Present	Present
18-0624-0013	2017	224 SAMPLES MALE, 8 FEMALE	AVERAGE 40 [19 - 83]	Australia (NSW)	Unknown	N/A	N/A	N/A	2	2	PENDING			PRJNA613115	3.6.1.1.2	CipR.MSM5	strong			Yes	Present	Present	Present	Present	Absent	Absent	Present	Present	Present	Present	Present	Present	Present	Present	Present	Present	Present	Present
18-0624-0014	2017	224 SAMPLES MALE, 8 FEMALE	AVERAGE 40 [19 - 83]	Australia (NSW)	Unknown	N/A	N/A	N/A	2	2	PENDING			PRJNA613115	3.6.1.1.2	CipR.MSM5	strong			Yes	Present	Present	Present	Present	Absent	Absent	Present	Present	Present	Present	Present	Present	Present	Present	Present	Present	Present	Present
18-0624-0015	2018	224 SAMPLES MALE, 8 FEMALE	AVERAGE 40 [19 - 83]	Australia (NSW)	Unknown	N/A	N/A	N/A	2	2	PENDING			PRJNA613115	3.6.1.1.2	CipR.MSM5	strong			Yes	Present	Present	Present	Present	Absent	Absent	Present	Present	Present	Present	Present	Present	Present	Present	Present	Present	Present	Present
18-0624-0016	2018	224 SAMPLES MALE, 8 FEMALE	AVERAGE 40 [19 - 83]	Australia (NSW)	Unknown	N/A	N/A	N/A	2	2	PENDING			PRJNA613115	3.6.1.1.2	CipR.MSM5	strong			Yes	Present	Present	Present	Present	Absent	Absent	Present	Present	Present	Present	Present	Present	Present	Present	Present	Present	Present	Present
18-0624-0017	2018	224 SAMPLES MALE, 8 FEMALE	AVERAGE 40 [19 - 83]	Australia (NSW)	Unknown	N/A	N/A	N/A	2	2	PENDING			PRJNA613115	3.6.1.1.2	CipR.MSM5	strong			Yes	Present	Present	Present	Present	Absent	Absent	Present	Present	Present	Present	Present	Present	Present	Present	Present	Present	Present	Present
18-0624-0018	2018	224 SAMPLES MALE, 8 FEMALE	AVERAGE 40 [19 - 83]	Australia (NSW)	Unknown	N/A	N/A	N/A	2	2	PENDING			PRJNA613115	3.6.1.1.2	CipR.MSM5	strong			Yes	Present	Present	Present	Present	Absent	Absent	Present	Present	Present	Present	Present	Present	Present	Present	Present	Present	Present	Present
18-0624-0019	2018	224 SAMPLES MALE, 8 FEMALE	AVERAGE 40 [19 - 83]	Australia (NSW)	Unknown	N/A	N/A	N/A	2	2	PENDING			PRJNA613115	3.6.1.1.2	CipR.MSM5	strong			Yes	Present	Present	Present	Present	Absent	Absent	Present	Present	Present	Present	Present	Present	Present	Present	Present	Present	Present	Present
18-0624-0020	2018	224 SAMPLES MALE, 8 FEMALE	AVERAGE 40 [19 - 83]	Australia (NSW)	Unknown	N/A	N/A	N/A	2	2	PENDING			PRJNA613115	3.6.1.1.2	CipR.MSM5	strong			Yes	Present	Present	Present	Present	Absent	Absent	Present	Present	Present	Present	Present	Present	Present	Present	Present	Present	Present	Present
18-0624-0021	2018	224 SAMPLES MALE, 8 FEMALE	AVERAGE 40 [19 - 83]	Australia (NSW)	Unknown	N/A	N/A	N/A	2	2	PENDING			PRJNA613115	3.6.1.1.2	CipR.MSM5	strong			Yes	Present	Present	Present	Present	Absent	Absent	Present	Present	Present	Present	Present	Present	Present	Present	Present	Present	Present	Present
18-0624-0022	2018	224 SAMPLES MALE, 8 FEMALE	AVERAGE 40 [19 - 83]	Australia (NSW)	Unknown	N/A	N/A	N/A	2	2	PENDING			PRJNA613115	3.6.1.1.2	CipR.MSM5	strong			Yes	Present	Present	Present	Present	Absent	Absent	Present	Present	Present	Present	Present	Present	Present	Present	Present	Present	Present	Present
18-0624-0023	2018	224 SAMPLES MALE, 8 FEMALE	AVERAGE 40 [19 - 83]	Australia (NSW)	Unknown	N/A	N/A	N/A	2	2	PENDING			PRJNA613115	3.6.1.1.2	CipR.MSM5	strong			Yes	Present	Present	Present	Present	Absent	Absent	Present	Present	Present	Present	Present	Present	Present	Present	Present	Present	Present	Present
18-0624-0024	2018	224 SAMPLES MALE, 8 FEMALE	AVERAGE 40 [19 - 83]	Australia (NSW)	Unknown	N/A	N/A	N/A	2	2	PENDING			PRJNA613115	3.6.1.1.2	CipR.MSM5	strong			Yes	Present	Present	Present	Present	Absent	Absent	Present	Present	Present	Present	Present	Present	Present	Present	Present	Present	Present	Present
18-0624-0025	2018	224 SAMPLES MALE, 8 FEMALE	AVERAGE 40 [19 - 83]	Australia (NSW)	Unknown	N/A	N/A	N/A	2	2	PENDING			PRJNA613115	3.6.1.1.2	CipR.MSM5	strong			Yes	Present	Present	Present	Present	Absent	Absent	Present	Present	Present	Present	Present	Present	Present	Present	Present	Present	Present	Present
18-0624-0026	2018	224 SAMPLES MALE, 8 FEMALE	AVERAGE 40 [19 - 83]	Australia (NSW)	Unknown	N/A	N/A	N/A	2	2	PENDING			PRJNA613115	3.6.1.1.2	CipR.MSM5	strong			Yes	Present	Present	Present	Absent	Absent	Absent	Present	Present	Present	Present	Present	Present	Present	Present	Present	Present	Present	Present
18-0624-0027	2018	224 SAMPLES MALE, 8 FEMALE	AVERAGE 40 [19 - 83]	Australia (NSW)	Unknown	N/A	N/A	N/A	2	2	PENDING			PRJNA613115	3.6.1.1.2	CipR.MSM5	strong			Yes	Present	Present	Present	Present	Absent	Absent	Present	Present	Present	Present	Present	Present	Present	Present	Present	Present	Present	Present
18-0624-0028	2018	224 SAMPLES MALE, 8 FEMALE	AVERAGE 40 [19 - 83]	Australia (NSW)	Unknown	N/A	N/A	N/A	2	2	PENDING			PRJNA613115	3.6.1.1.2	CipR.MSM5	strong			Yes	Present	Present	Present	Present	Absent	Absent	Present	Present	Present	Present	Present	Present	Present	Present	Present	Present	Present	Present
18-0624-0029	2017	224 SAMPLES MALE, 8 FEMALE	AVERAGE 40 [19 - 83]	Australia (NSW)	Unknown	N/A	N/A	N/A	2	3	PENDING			PRJNA613115	3.6.1.1.2	CipR.MSM5	strong			Yes	Present	Absent	Absent	Present	Absent	Absent	Present	Present	Present	Absent	Absent	Present	Present	Present	Present	Present	Present	Present
18-0624-0033	2017	224 SAMPLES MALE, 8 FEMALE	AVERAGE 40 [19 - 83]	Australia (NSW)	Unknown	N/A	N/A	N/A	2	2	PENDING			PRJNA613115	3.6.1.1.2	CipR.MSM5	strong			Yes	Present	Present	Present	Present	Absent	Absent	Present	Present	Present	Present	Present	Present	Present	Present	Present	Present	Present	Present
18-0624-0034	2017	224 SAMPLES MALE, 8 FEMALE	AVERAGE 40 [19 - 83]	Australia (NSW)	Unknown	N/A	N/A	N/A	2	2	PENDING			PRJNA613115	3.6.1.1.2	CipR.MSM5	strong			Yes	Present	Present	Present	Present	Absent	Absent	Present	Present	Present	Present	Present	Present	Present	Present	Present	Present	Present	Present
18-0624-0035	2017	224 SAMPLES MALE, 8 FEMALE	AVERAGE 40 [19 - 83]	Australia (NSW)	Unknown	N/A	N/A	N/A	2	2	PENDING			PRJNA613115	3.6.1.1.2	CipR.MSM5	strong			Yes	Present	Present	Present	Absent	Absent	Absent	Present	Present	Present	Present	Absent	Present	Present	Present	Present	Present	Present	Present
18-0624-0037	2018	224 SAMPLES MALE, 8 FEMALE	AVERAGE 40 [19 - 83]	Australia (NSW)	Unknown	N/A	N/A	N/A	None		PENDING			PRJNA613115	3.6.1.1.2	CipR.MSM5	Strong			Yes
18-0624-0038	2018	224 SAMPLES MALE, 8 FEMALE	AVERAGE 40 [19 - 83]	Australia (NSW)	Unknown	N/A	N/A	N/A	2	4	PENDING			PRJNA613115	3.6.1.1.2	CipR.MSM5	strong			Yes	Present	Present	Present	Present	Absent	Absent	Present	Present	Present	Present	Present	Present	Present	Present	Present	Present	Present	Present
19-001-0054	2019	224 SAMPLES MALE, 8 FEMALE	AVERAGE 40 [19 - 83]	Australia (NSW)	Unknown	N/A	N/A	N/A	2	1	PENDING			PRJNA613115	3.6.1.1.2	CipR.MSM5	strong			Yes	Present	Absent	Absent	Present	Absent	Absent	Present	Present	Present	Absent	Absent	Present	Present	Present	Present	Present	Present	Present
19-001-0055	2019	224 SAMPLES MALE, 8 FEMALE	AVERAGE 40 [19 - 83]	Australia (NSW)	Unknown	N/A	N/A	N/A	2	5	PENDING			PRJNA613115	3.6.1.1.2	CipR.MSM5	strong			Yes	Present	Present	Present	Present	Absent	Present	Present	Present	Present	Present	Present	Present	Present	Present	Present	Present	Present	Present
19-001-0057	2019	224 SAMPLES MALE, 8 FEMALE	AVERAGE 40 [19 - 83]	Australia (NSW)	Unknown	N/A	N/A	N/A	2	5	PENDING			PRJNA613115	3.6.1.1.2	CipR.MSM5	strong			Yes	Present	Present	Present	Present	Absent	Present	Present	Present	Present	Present	Present	Present	Present	Present	Present	Present	Present	Present
19-001-0164	2019	224 SAMPLES MALE, 8 FEMALE	AVERAGE 40 [19 - 83]	Australia (NSW)	Unknown	N/A	N/A	N/A	2	1	PENDING			PRJNA613115	3.6.1.1.2	CipR.MSM5	strong			Yes	Present	Present	Present	Present	Absent	Absent	Present	Present	Present	Present	Present	Present	Present	Present	Present	Present	Present	Present
19-001-0166	2019	224 SAMPLES MALE, 8 FEMALE	AVERAGE 40 [19 - 83]	Australia (NSW)	Unknown	N/A	N/A	N/A	2	5	PENDING			PRJNA613115	3.6.1.1.2	CipR.MSM5	strong			Yes	Present	Present	Present	Present	Absent	Present	Present	Present	Present	Present	Present	Present	Present	Present	Present	Present	Present	Present
19-001-0167	2019	224 SAMPLES MALE, 8 FEMALE	AVERAGE 40 [19 - 83]	Australia (NSW)	Unknown	N/A	N/A	N/A	2	3	PENDING			PRJNA613115	3.6.1.1.2	CipR.MSM5	strong			Yes	Present	Present	Present	Present	Absent	Absent	Present	Present	Present	Present	Present	Present	Present	Present	Present	Present	Present	Present
19-001-0244	2019	224 SAMPLES MALE, 8 FEMALE	AVERAGE 40 [19 - 83]	Australia (NSW)	Unknown	N/A	N/A	N/A	2	1	PENDING			PRJNA613115	3.6.1.1.2	CipR.MSM5	strong			Yes	Present	Absent	Absent	Present	Absent	Absent	Present	Present	Present	Absent	Absent	Present	Present	Present	Present	Present	Present	Present
19-001-0246	2019	224 SAMPLES MALE, 8 FEMALE	AVERAGE 40 [19 - 83]	Australia (NSW)	Unknown	N/A	N/A	N/A	2	5	PENDING			PRJNA613115	3.6.1.1.2	CipR.MSM5	strong			Yes	Present	Present	Present	Present	Absent	Present	Present	Present	Present	Present	Present	Present	Present	Present	Present	Present	Present	Present
20-001-1290	2020	224 SAMPLES MALE, 8 FEMALE	AVERAGE 40 [19 - 83]	Australia (NSW)	Unknown	N/A	N/A	N/A	2	5	PENDING			PRJNA613115	3.6.1.1.2	CipR.MSM5	strong			Yes	Present	Present	Present	Present	Absent	Present	Present	Present	Present	Present	Present	Present	Present	Present	Present	Present	Present	Present
19-001-0277	2019	224 SAMPLES MALE, 8 FEMALE	AVERAGE 40 [19 - 83]	Australia (NSW)	Unknown	N/A	N/A	N/A	2	1	PENDING			PRJNA613115	3.6.1.1.2	CipR.MSM5	strong			Yes	Present	Present	Present	Present	Absent	Absent	Present	Present	Present	Present	Present	Present	Present	Present	Present	Present	Present	Present
19-001-0279	2019	224 SAMPLES MALE, 8 FEMALE	AVERAGE 40 [19 - 83]	Australia (NSW)	Unknown	N/A	N/A	N/A	2	5	PENDING			PRJNA613115	3.6.1.1.2	CipR.MSM5	strong			Yes	Present	Present	Present	Present	Absent	Present	Present	Present	Present	Present	Present	Present	Present	Present	Present	Present	Present	Present
19-001-0283	2019	224 SAMPLES MALE, 8 FEMALE	AVERAGE 40 [19 - 83]	Australia (NSW)	Unknown	N/A	N/A	N/A	2	3	PENDING			PRJNA613115	3.6.1.1.2	CipR.MSM5	strong			Yes	Present	Absent	Absent	Present	Absent	Absent	Present	Present	Present	Absent	Absent	Present	Present	Present	Present	Present	Present	Present
19-001-0371	2019	224 SAMPLES MALE, 8 FEMALE	AVERAGE 40 [19 - 83]	Australia (NSW)	Unknown	N/A	N/A	N/A	2	3	PENDING			PRJNA613115	3.6.1.1.2	CipR.MSM5	strong			Yes	Present	Present	Present	Present	Absent	Absent	Present	Present	Present	Present	Present	Present	Present	Present	Present	Present	Present	Present
19-001-0372	2019	224 SAMPLES MALE, 8 FEMALE	AVERAGE 40 [19 - 83]	Australia (NSW)	Unknown	N/A	N/A	N/A	2	4	PENDING			PRJNA613115	3.6.1.1.2	CipR.MSM5	strong			Yes	Absent	Absent	Absent	Absent	Absent	Absent	Absent	Absent	Absent	Absent	Absent	Present	Absent	Present	Absent	Present	Present	Present
S21BD00994	2021	Male	16 - 60	Belgium	Unknown	N/A	N/A	N/A	2	5	ERS13427310			PRJEB40097	3.6.1.1.2	CipR.MSM5	strong			Yes	Present	Present	Present	Absent	Present	Present	Present	Present	Present	Present	Present	Present	Present	Present	Present	Present	Present	Present
19-001-0410	2019	224 SAMPLES MALE, 8 FEMALE	AVERAGE 40 [19 - 83]	Australia (NSW)	Unknown	N/A	N/A	N/A	2	4	PENDING			PRJNA613115	3.6.1.1.2	CipR.MSM5	strong			Yes	Absent	Absent	Absent	Absent	Absent	Absent	Absent	Present	Present	Absent	Absent	Present	Absent	Present	Present	Present	Present	Present
19-001-0412	2019	224 SAMPLES MALE, 8 FEMALE	AVERAGE 40 [19 - 83]	Australia (NSW)	Unknown	N/A	N/A	N/A	2	1	PENDING			PRJNA613115	3.6.1.1.2	CipR.MSM5	strong			Yes	Present	Absent	Absent	Present	Absent	Absent	Present	Present	Present	Absent	Absent	Present	Present	Present	Present	Present	Present	Present
19-001-0413	2019	224 SAMPLES MALE, 8 FEMALE	AVERAGE 40 [19 - 83]	Australia (NSW)	Unknown	N/A	N/A	N/A	2	5	PENDING			PRJNA613115	3.6.1.1.2	CipR.MSM5	strong			Yes	Present	Absent	Absent	Present	Absent	Present	Present	Present	Present	Absent	Absent	Present	Present	Present	Present	Present	Present	Present
19-001-0414	2019	224 SAMPLES MALE, 8 FEMALE	AVERAGE 40 [19 - 83]	Australia (NSW)	Unknown	N/A	N/A	N/A	2	3	PENDING			PRJNA613115	3.6.1.1.2	CipR.MSM5	strong			Yes	Present	Absent	Absent	Present	Absent	Absent	Present	Present	Present	Absent	Absent	Present	Present	Present	Present	Present	Present	Present
19-001-0467	2019	224 SAMPLES MALE, 8 FEMALE	AVERAGE 40 [19 - 83]	Australia (NSW)	Unknown	N/A	N/A	N/A	2	5	PENDING			PRJNA613115	3.6.1.1.2	CipR.MSM5	strong			Yes	Present	Present	Present	Present	Absent	Present	Present	Present	Present	Present	Present	Present	Present	Present	Present	Present	Present	Present
19-001-0516	2019	224 SAMPLES MALE, 8 FEMALE	AVERAGE 40 [19 - 83]	Australia (NSW)	Unknown	N/A	N/A	N/A	2	5	PENDING			PRJNA613115	3.6.1.1.2	CipR.MSM5	strong			Yes	Present	Present	Present	Present	Absent	Present	Present	Present	Present	Present	Present	Present	Present	Present	Present	Present	Present	Present
19-001-0517	2019	224 SAMPLES MALE, 8 FEMALE	AVERAGE 40 [19 - 83]	Australia (NSW)	Unknown	N/A	N/A	N/A	2	4	PENDING			PRJNA613115	3.6.1.1.2	CipR.MSM5	strong			Yes	Absent	Absent	Absent	Absent	Absent	Absent	Absent	Present	Present	Absent	Absent	Present	Absent	Present	Present	Present	Present	Present
19-001-0519	2019	224 SAMPLES MALE, 8 FEMALE	AVERAGE 40 [19 - 83]	Australia (NSW)	Unknown	N/A	N/A	N/A	2	4	PENDING			PRJNA613115	3.6.1.1.2	CipR.MSM5	strong			Yes	Absent	Present	Present	Absent	Absent	Absent	Absent	Absent	Absent	Present	Present	Present	Absent	Present	Absent	Present	Present	Present
19-001-0520	2019	224 SAMPLES MALE, 8 FEMALE	AVERAGE 40 [19 - 83]	Australia (NSW)	Unknown	N/A	N/A	N/A	2	1	PENDING			PRJNA613115	3.6.1.1.2	CipR.MSM5	strong			Yes	Present	Absent	Absent	Present	Absent	Absent	Present	Present	Present	Absent	Absent	Present	Present	Present	Present	Present	Present	Present
19-001-0521	2019	224 SAMPLES MALE, 8 FEMALE	AVERAGE 40 [19 - 83]	Australia (NSW)	Unknown	N/A	N/A	N/A	2	5	PENDING			PRJNA613115	3.6.1.1.2	CipR.MSM5	strong			Yes	Present	Present	Present	Present	Absent	Present	Present	Present	Present	Present	Present	Present	Present	Present	Present	Present	Present	Present
19-001-0522	2019	224 SAMPLES MALE, 8 FEMALE	AVERAGE 40 [19 - 83]	Australia (NSW)	Unknown	N/A	N/A	N/A	2	5	PENDING			PRJNA613115	3.6.1.1.2	CipR.MSM5	strong			Yes	Present	Present	Present	Present	Absent	Present	Present	Present	Present	Present	Present	Present	Present	Present	Present	Present	Present	Present
19-001-0523	2019	224 SAMPLES MALE, 8 FEMALE	AVERAGE 40 [19 - 83]	Australia (NSW)	Unknown	N/A	N/A	N/A	2	5	PENDING			PRJNA613115	3.6.1.1.2	CipR.MSM5	strong			Yes	Present	Present	Present	Present	Absent	Present	Present	Present	Present	Present	Present	Present	Present	Present	Present	Present	Present	Present
19-001-0549	2019	224 SAMPLES MALE, 8 FEMALE	AVERAGE 40 [19 - 83]	Australia (NSW)	Unknown	N/A	N/A	N/A	2	5	PENDING			PRJNA613115	3.6.1.1.2	CipR.MSM5	strong			Yes	Present	Present	Present	Present	Absent	Present	Present	Present	Present	Present	Present	Present	Present	Present	Present	Present	Present	Present
19-001-0617	2019	224 SAMPLES MALE, 8 FEMALE	AVERAGE 40 [19 - 83]	Australia (NSW)	Unknown	N/A	N/A	N/A	2	3	PENDING			PRJNA613115	3.6.1.1.2	CipR.MSM5	strong			Yes	Present	Present	Present	Present	Absent	Absent	Present	Present	Present	Present	Present	Present	Present	Present	Present	Present	Present	Present
19-001-0618	2019	224 SAMPLES MALE, 8 FEMALE	AVERAGE 40 [19 - 83]	Australia (NSW)	Unknown	N/A	N/A	N/A	2	3	PENDING			PRJNA613115	3.6.1.1.2	CipR.MSM5	strong			Yes	Present	Present	Present	Present	Absent	Absent	Present	Present	Present	Present	Present	Present	Present	Present	Present	Present	Present	Present
19-001-0622	2019	224 SAMPLES MALE, 8 FEMALE	AVERAGE 40 [19 - 83]	Australia (NSW)	Unknown	N/A	N/A	N/A	2	3	PENDING			PRJNA613115	3.6.1.1.2	CipR.MSM5	strong			Yes	Present	Present	Present	Present	Absent	Absent	Present	Present	Present	Present	Present	Present	Present	Present	Present	Present	Present	Present
19-001-0623	2019	224 SAMPLES MALE, 8 FEMALE	AVERAGE 40 [19 - 83]	Australia (NSW)	Unknown	N/A	N/A	N/A	2	1	PENDING			PRJNA613115	3.6.1.1.2	CipR.MSM5	strong			Yes	Present	Present	Present	Present	Absent	Absent	Present	Present	Present	Present	Present	Present	Present	Present	Present	Present	Present	Present
19-001-0624	2019	224 SAMPLES MALE, 8 FEMALE	AVERAGE 40 [19 - 83]	Australia (NSW)	Unknown	N/A	N/A	N/A	2	3	PENDING			PRJNA613115	3.6.1.1.2	CipR.MSM5	strong			Yes	Present	Present	Present	Present	Absent	Absent	Present	Present	Present	Present	Present	Present	Present	Present	Present	Present	Present	Present
19-001-0626	2019	224 SAMPLES MALE, 8 FEMALE	AVERAGE 40 [19 - 83]	Australia (NSW)	Unknown	N/A	N/A	N/A	2	3	PENDING			PRJNA613115	3.6.1.1.2	CipR.MSM5	strong			Yes	Present	Present	Present	Present	Absent	Absent	Present	Present	Present	Present	Present	Present	Present	Present	Present	Present	Present	Present
19-001-0627	2019	224 SAMPLES MALE, 8 FEMALE	AVERAGE 40 [19 - 83]	Australia (NSW)	Unknown	N/A	N/A	N/A	2	1	PENDING			PRJNA613115	3.6.1.1.2	CipR.MSM5	strong			Yes	Present	Present	Present	Present	Absent	Absent	Present	Present	Present	Present	Present	Present	Present	Present	Present	Present	Present	Present
19-001-0628	2019	224 SAMPLES MALE, 8 FEMALE	AVERAGE 40 [19 - 83]	Australia (NSW)	Unknown	N/A	N/A	N/A	2	1	PENDING			PRJNA613115	3.6.1.1.2	CipR.MSM5	strong			Yes	Present	Present	Present	Present	Absent	Absent	Present	Present	Present	Present	Present	Present	Present	Present	Present	Present	Present	Present
19-001-0630	2019	224 SAMPLES MALE, 8 FEMALE	AVERAGE 40 [19 - 83]	Australia (NSW)	Unknown	N/A	N/A	N/A	2	1	PENDING			PRJNA613115	3.6.1.1.2	CipR.MSM5	strong			Yes	Present	Present	Present	Present	Absent	Absent	Present	Present	Present	Present	Present	Present	Present	Present	Present	Present	Present	Present
S21BD06290	2021	Male	16 - 60	Belgium	Unknown	N/A	N/A	N/A	2	5	ERS13427319			PRJEB40097	3.6.1.1.2	CipR.MSM5	strong			Yes	Present	Present	Present	Absent	Present	Present	Present	Present	Present	Present	Present	Present	Present	Present	Present	Present	Present	Present
19-001-0634	2019	224 SAMPLES MALE, 8 FEMALE	AVERAGE 40 [19 - 83]	Australia (NSW)	Unknown	N/A	N/A	N/A	2	5	PENDING			PRJNA613115	3.6.1.1.2	CipR.MSM5	strong			Yes	Present	Present	Present	Present	Absent	Present	Present	Present	Present	Present	Present	Present	Present	Present	Present	Present	Present	Present
19-001-0635	2019	224 SAMPLES MALE, 8 FEMALE	AVERAGE 40 [19 - 83]	Australia (NSW)	Unknown	N/A	N/A	N/A	2	5	PENDING			PRJNA613115	3.6.1.1.2	CipR.MSM5	strong			Yes	Present	Present	Present	Present	Absent	Present	Present	Present	Present	Present	Present	Present	Present	Present	Present	Present	Present	Present
19-001-0636	2019	224 SAMPLES MALE, 8 FEMALE	AVERAGE 40 [19 - 83]	Australia (NSW)	Unknown	N/A	N/A	N/A	2	1	PENDING			PRJNA613115	3.6.1.1.2	CipR.MSM5	strong			Yes	Present	Present	Present	Present	Absent	Absent	Present	Present	Present	Present	Present	Present	Present	Present	Present	Present	Present	Present
19-001-0637	2019	224 SAMPLES MALE, 8 FEMALE	AVERAGE 40 [19 - 83]	Australia (NSW)	Unknown	N/A	N/A	N/A	2	1	PENDING			PRJNA613115	3.6.1.1.2	CipR.MSM5	strong			Yes	Present	Present	Present	Present	Absent	Absent	Present	Present	Present	Present	Present	Present	Present	Present	Present	Present	Present	Present
S21BD06435	2021	Unknown	< 16	Belgium	Unknown	N/A	N/A	N/A	2	5	ERS13427320			PRJEB40097	3.6.1.1.2	CipR.MSM5	strong			Yes	Present	Present	Present	Absent	Present	Present	Present	Present	Present	Present	Present	Present	Present	Present	Present	Present	Present	Present
S21BD07071	2021	Female	16 - 60	Belgium	Unknown	N/A	N/A	N/A	2	5	ERS13427324			PRJEB40097	3.6.1.1.2	CipR.MSM5	strong			Yes	Present	Present	Present	Absent	Present	Present	Present	Present	Present	Present	Present	Present	Present	Present	Present	Present	Present	Present
19-001-0644	2019	224 SAMPLES MALE, 8 FEMALE	AVERAGE 40 [19 - 83]	Australia (NSW)	Unknown	N/A	N/A	N/A	2	4	PENDING			PRJNA613115	3.6.1.1.2	CipR.MSM5	strong			Yes	Present	Present	Present	Present	Absent	Absent	Present	Present	Present	Present	Present	Present	Present	Present	Present	Present	Present	Present
S21BD08888	2021	Male	16 - 60	Belgium	Unknown	N/A	N/A	N/A	2	5	ERS13427333			PRJEB40097	3.6.1.1.2	CipR.MSM5	strong			Yes	Present	Present	Present	Absent	Present	Present	Present	Present	Present	Present	Present	Present	Present	Present	Present	Present	Present	Present
19-001-0646	2019	224 SAMPLES MALE, 8 FEMALE	AVERAGE 40 [19 - 83]	Australia (NSW)	Unknown	N/A	N/A	N/A	2	1	PENDING			PRJNA613115	3.6.1.1.2	CipR.MSM5	strong			Yes	Absent	Present	Present	Absent	Absent	Absent	Present	Present	Absent	Present	Present	Present	Absent	Present	Absent	Present	Present	Present
19-001-0650	2019	224 SAMPLES MALE, 8 FEMALE	AVERAGE 40 [19 - 83]	Australia (NSW)	Unknown	N/A	N/A	N/A	2	5	PENDING			PRJNA613115	3.6.1.1.2	CipR.MSM5	strong			Yes	Present	Present	Present	Present	Absent	Present	Present	Present	Present	Present	Present	Present	Present	Present	Present	Present	Present	Present
19-001-0651	2019	224 SAMPLES MALE, 8 FEMALE	AVERAGE 40 [19 - 83]	Australia (NSW)	Unknown	N/A	N/A	N/A	2	1	PENDING			PRJNA613115	3.6.1.1.2	CipR.MSM5	strong			Yes	Present	Present	Present	Present	Absent	Absent	Present	Present	Present	Present	Present	Present	Present	Present	Present	Present	Present	Present
19-001-0652	2019	224 SAMPLES MALE, 8 FEMALE	AVERAGE 40 [19 - 83]	Australia (NSW)	Unknown	N/A	N/A	N/A	2	3	PENDING			PRJNA613115	3.6.1.1.2	CipR.MSM5	strong			Yes	Present	Present	Present	Present	Absent	Absent	Present	Present	Present	Present	Present	Present	Present	Present	Present	Present	Present	Present
19-001-0656	2019	224 SAMPLES MALE, 8 FEMALE	AVERAGE 40 [19 - 83]	Australia (NSW)	Unknown	N/A	N/A	N/A	2	1	PENDING			PRJNA613115	3.6.1.1.2	CipR.MSM5	strong			Yes	Present	Present	Present	Present	Absent	Absent	Present	Present	Present	Present	Present	Present	Present	Present	Present	Present	Present	Present
19-001-0657	2019	224 SAMPLES MALE, 8 FEMALE	AVERAGE 40 [19 - 83]	Australia (NSW)	Unknown	N/A	N/A	N/A	2	5	PENDING			PRJNA613115	3.6.1.1.2	CipR.MSM5	strong			Yes	Present	Present	Present	Present	Absent	Present	Present	Present	Present	Present	Present	Present	Present	Present	Present	Present	Present	Present
19-001-0659	2019	224 SAMPLES MALE, 8 FEMALE	AVERAGE 40 [19 - 83]	Australia (NSW)	Unknown	N/A	N/A	N/A	2	4	PENDING			PRJNA613115	3.6.1.1.2	CipR.MSM5	strong			Yes	Present	Present	Present	Present	Absent	Absent	Present	Present	Present	Present	Present	Present	Present	Present	Present	Present	Present	Present
19-001-0662	2019	224 SAMPLES MALE, 8 FEMALE	AVERAGE 40 [19 - 83]	Australia (NSW)	Unknown	N/A	N/A	N/A	2	3	PENDING			PRJNA613115	3.6.1.1.2	CipR.MSM5	strong			Yes	Present	Absent	Absent	Present	Absent	Absent	Present	Present	Present	Absent	Absent	Present	Present	Present	Present	Present	Present	Present
19-001-0663	2019	224 SAMPLES MALE, 8 FEMALE	AVERAGE 40 [19 - 83]	Australia (NSW)	Unknown	N/A	N/A	N/A	2	2	PENDING			PRJNA613115	3.6.1.1.2	CipR.MSM5	strong			Yes	Present	Present	Present	Present	Absent	Absent	Present	Present	Present	Present	Present	Present	Present	Present	Present	Present	Present	Present
19-001-0669	2019	224 SAMPLES MALE, 8 FEMALE	AVERAGE 40 [19 - 83]	Australia (NSW)	Unknown	N/A	N/A	N/A	2	1	PENDING			PRJNA613115	3.6.1.1.2	CipR.MSM5	strong			Yes	Present	Present	Present	Absent	Absent	Absent	Present	Present	Present	Present	Present	Present	Present	Present	Present	Present	Present	Present
19-001-0671	2019	224 SAMPLES MALE, 8 FEMALE	AVERAGE 40 [19 - 83]	Australia (NSW)	Unknown	N/A	N/A	N/A	2	1	PENDING			PRJNA613115	3.6.1.1.2	CipR.MSM5	strong			Yes	Present	Present	Present	Present	Absent	Absent	Present	Present	Present	Present	Present	Present	Present	Present	Present	Present	Present	Present
19-001-0674	2019	224 SAMPLES MALE, 8 FEMALE	AVERAGE 40 [19 - 83]	Australia (NSW)	Unknown	N/A	N/A	N/A	2	1	PENDING			PRJNA613115	3.6.1.1.2	CipR.MSM5	strong			Yes	Present	Present	Present	Present	Absent	Absent	Present	Present	Present	Present	Present	Present	Present	Present	Present	Present	Present	Present
19-001-0676	2019	224 SAMPLES MALE, 8 FEMALE	AVERAGE 40 [19 - 83]	Australia (NSW)	Unknown	N/A	N/A	N/A	2	1	PENDING			PRJNA613115	3.6.1.1.2	CipR.MSM5	strong			Yes	Present	Present	Present	Present	Absent	Absent	Present	Present	Present	Present	Present	Present	Present	Present	Present	Present	Present	Present
19-0620-0001	2019	224 SAMPLES MALE, 8 FEMALE	AVERAGE 40 [19 - 83]	Australia (NSW)	Unknown	N/A	N/A	N/A	2	4	PENDING			PRJNA613115	3.6.1.1.2	CipR.MSM5	strong			Yes	Present	Present	Present	Present	Absent	Absent	Present	Present	Present	Present	Present	Present	Present	Present	Present	Present	Present	Present
19-0620-0003	2019	224 SAMPLES MALE, 8 FEMALE	AVERAGE 40 [19 - 83]	Australia (NSW)	Unknown	N/A	N/A	N/A	None		PENDING			PRJNA613115	3.6.1.1.2	CipR.MSM5	Strong			Yes
19-0620-0007	2019	224 SAMPLES MALE, 8 FEMALE	AVERAGE 40 [19 - 83]	Australia (NSW)	Unknown	N/A	N/A	N/A	2	1	PENDING			PRJNA613115	3.6.1.1.2	CipR.MSM5	strong			Yes	Present	Present	Present	Present	Absent	Absent	Present	Present	Present	Present	Present	Present	Present	Present	Present	Present	Present	Present
19-0620-0008	2019	224 SAMPLES MALE, 8 FEMALE	AVERAGE 40 [19 - 83]	Australia (NSW)	Unknown	N/A	N/A	N/A	2	5	PENDING			PRJNA613115	3.6.1.1.2	CipR.MSM5	strong			Yes	Present	Present	Present	Present	Absent	Present	Present	Present	Present	Present	Present	Present	Present	Present	Present	Present	Present	Present
19-0620-0009	2019	224 SAMPLES MALE, 8 FEMALE	AVERAGE 40 [19 - 83]	Australia (NSW)	Unknown	N/A	N/A	N/A	2	1	PENDING			PRJNA613115	3.6.1.1.2	CipR.MSM5	strong			Yes	Present	Present	Present	Present	Absent	Absent	Present	Present	Present	Present	Present	Present	Present	Present	Present	Present	Present	Present
19-0620-0012	2019	224 SAMPLES MALE, 8 FEMALE	AVERAGE 40 [19 - 83]	Australia (NSW)	Unknown	N/A	N/A	N/A	2	1	PENDING			PRJNA613115	3.6.1.1.2	CipR.MSM5	strong			Yes	Present	Present	Present	Present	Absent	Absent	Present	Present	Present	Present	Present	Present	Present	Present	Present	Present	Present	Present
19-0620-0013	2019	224 SAMPLES MALE, 8 FEMALE	AVERAGE 40 [19 - 83]	Australia (NSW)	Unknown	N/A	N/A	N/A	2	3	PENDING			PRJNA613115	3.6.1.1.2	CipR.MSM5	strong			Yes	Present	Present	Present	Present	Absent	Absent	Present	Present	Present	Present	Present	Present	Present	Present	Absent	Present	Present	Present
19-0620-0014	2019	224 SAMPLES MALE, 8 FEMALE	AVERAGE 40 [19 - 83]	Australia (NSW)	Unknown	N/A	N/A	N/A	2	1	PENDING			PRJNA613115	3.6.1.1.2	CipR.MSM5	strong			Yes	Present	Present	Present	Present	Absent	Absent	Present	Present	Present	Present	Present	Present	Present	Present	Present	Present	Present	Present
19-0620-0018	2019	224 SAMPLES MALE, 8 FEMALE	AVERAGE 40 [19 - 83]	Australia (NSW)	Unknown	N/A	N/A	N/A	2	1	PENDING			PRJNA613115	3.6.1.1.2	CipR.MSM5	strong			Yes	Present	Absent	Absent	Present	Absent	Absent	Present	Present	Present	Absent	Absent	Present	Present	Present	Present	Present	Present	Present
19-0620-0021	2019	224 SAMPLES MALE, 8 FEMALE	AVERAGE 40 [19 - 83]	Australia (NSW)	Unknown	N/A	N/A	N/A	2	3	PENDING			PRJNA613115	3.6.1.1.2	CipR.MSM5	strong			Yes	Present	Present	Present	Present	Absent	Absent	Present	Present	Present	Present	Present	Present	Present	Present	Present	Present	Present	Present
19-0620-0022	2019	224 SAMPLES MALE, 8 FEMALE	AVERAGE 40 [19 - 83]	Australia (NSW)	Unknown	N/A	N/A	N/A	2	1	PENDING			PRJNA613115	3.6.1.1.2	CipR.MSM5	strong			Yes	Present	Present	Present	Present	Absent	Absent	Present	Present	Present	Present	Present	Present	Present	Present	Present	Present	Present	Present
19-0620-0023	2019	224 SAMPLES MALE, 8 FEMALE	AVERAGE 40 [19 - 83]	Australia (NSW)	Unknown	N/A	N/A	N/A	2	2	PENDING			PRJNA613115	3.6.1.1.2	CipR.MSM5	strong			Yes	Present	Absent	Absent	Present	Absent	Absent	Present	Present	Present	Absent	Absent	Present	Present	Present	Present	Present	Present	Present
19-0620-0024	2019	224 SAMPLES MALE, 8 FEMALE	AVERAGE 40 [19 - 83]	Australia (NSW)	Unknown	N/A	N/A	N/A	2	1	PENDING			PRJNA613115	3.6.1.1.2	CipR.MSM5	strong			Yes	Present	Present	Present	Present	Absent	Absent	Present	Present	Present	Present	Present	Present	Present	Present	Present	Present	Present	Present
19-0620-0025	2019	224 SAMPLES MALE, 8 FEMALE	AVERAGE 40 [19 - 83]	Australia (NSW)	Unknown	N/A	N/A	N/A	2	1	PENDING			PRJNA613115	3.6.1.1.2	CipR.MSM5	strong			Yes	Present	Present	Present	Present	Absent	Absent	Present	Present	Present	Present	Present	Present	Present	Present	Present	Present	Present	Present
19-0620-0026	2019	224 SAMPLES MALE, 8 FEMALE	AVERAGE 40 [19 - 83]	Australia (NSW)	Unknown	N/A	N/A	N/A	2	1	PENDING			PRJNA613115	3.6.1.1.2	CipR.MSM5	strong			Yes	Present	Present	Present	Present	Absent	Absent	Present	Present	Present	Present	Present	Present	Present	Present	Present	Present	Present	Present
19-0620-0028	2019	224 SAMPLES MALE, 8 FEMALE	AVERAGE 40 [19 - 83]	Australia (NSW)	Unknown	N/A	N/A	N/A	2	3	PENDING			PRJNA613115	3.6.1.1.2	CipR.MSM5	strong			Yes	Present	Present	Present	Present	Absent	Absent	Present	Present	Present	Present	Present	Present	Present	Present	Present	Present	Present	Present
19-0620-0031	2019	224 SAMPLES MALE, 8 FEMALE	AVERAGE 40 [19 - 83]	Australia (NSW)	Unknown	N/A	N/A	N/A	2	3	PENDING			PRJNA613115	3.6.1.1.2	CipR.MSM5	strong			Yes	Present	Present	Present	Present	Absent	Absent	Present	Present	Present	Present	Present	Present	Present	Present	Present	Present	Present	Present
19-0620-0035	2019	224 SAMPLES MALE, 8 FEMALE	AVERAGE 40 [19 - 83]	Australia (NSW)	Unknown	N/A	N/A	N/A	2	1	PENDING			PRJNA613115	3.6.1.1.2	CipR.MSM5	strong			Yes	Present	Present	Present	Present	Absent	Absent	Present	Present	Present	Present	Present	Present	Present	Present	Present	Present	Present	Present
19-0620-0036	2019	224 SAMPLES MALE, 8 FEMALE	AVERAGE 40 [19 - 83]	Australia (NSW)	Unknown	N/A	N/A	N/A	2	1	PENDING			PRJNA613115	3.6.1.1.2	CipR.MSM5	strong			Yes	Present	Present	Present	Present	Absent	Absent	Present	Present	Present	Present	Present	Present	Present	Present	Present	Present	Present	Present
19-0620-0037	2019	224 SAMPLES MALE, 8 FEMALE	AVERAGE 40 [19 - 83]	Australia (NSW)	Unknown	N/A	N/A	N/A	2	1	PENDING			PRJNA613115	3.6.1.1.2	CipR.MSM5	strong			Yes	Present	Absent	Absent	Present	Absent	Absent	Present	Present	Present	Absent	Absent	Present	Present	Present	Present	Present	Present	Present
19-0620-0039	2019	224 SAMPLES MALE, 8 FEMALE	AVERAGE 40 [19 - 83]	Australia (NSW)	Unknown	N/A	N/A	N/A	2	5	PENDING			PRJNA613115	3.6.1.1.2	CipR.MSM5	strong			Yes	Present	Present	Present	Present	Absent	Present	Present	Present	Present	Present	Present	Present	Present	Present	Present	Present	Present	Present
19-0620-0043	2019	224 SAMPLES MALE, 8 FEMALE	AVERAGE 40 [19 - 83]	Australia (NSW)	Unknown	N/A	N/A	N/A	2	1	PENDING			PRJNA613115	3.6.1.1.2	CipR.MSM5	strong			Yes	Present	Absent	Absent	Present	Absent	Absent	Present	Present	Present	Absent	Absent	Present	Present	Present	Present	Present	Present	Present
19-0620-0045	2019	224 SAMPLES MALE, 8 FEMALE	AVERAGE 40 [19 - 83]	Australia (NSW)	Unknown	N/A	N/A	N/A	2	3	PENDING			PRJNA613115	3.6.1.1.2	CipR.MSM5	strong			Yes	Present	Present	Present	Present	Absent	Absent	Present	Present	Present	Present	Present	Present	Present	Present	Present	Present	Present	Present
19-0620-0049	2019	224 SAMPLES MALE, 8 FEMALE	AVERAGE 40 [19 - 83]	Australia (NSW)	Unknown	N/A	N/A	N/A	2	3	PENDING			PRJNA613115	3.6.1.1.2	CipR.MSM5	strong			Yes	Present	Present	Present	Present	Absent	Absent	Present	Present	Present	Present	Present	Present	Present	Present	Present	Present	Present	Present
19-0620-0050	2019	224 SAMPLES MALE, 8 FEMALE	AVERAGE 40 [19 - 83]	Australia (NSW)	Unknown	N/A	N/A	N/A	2	1	PENDING			PRJNA613115	3.6.1.1.2	CipR.MSM5	strong			Yes	Present	Present	Present	Present	Absent	Absent	Present	Present	Present	Present	Present	Present	Present	Present	Present	Present	Present	Present
19-0620-0054	2019	224 SAMPLES MALE, 8 FEMALE	AVERAGE 40 [19 - 83]	Australia (NSW)	Unknown	N/A	N/A	N/A	2	3	PENDING			PRJNA613115	3.6.1.1.2	CipR.MSM5	strong			Yes	Present	Present	Present	Present	Absent	Absent	Present	Present	Present	Present	Present	Present	Present	Present	Present	Present	Present	Present
19-0620-0055	2019	224 SAMPLES MALE, 8 FEMALE	AVERAGE 40 [19 - 83]	Australia (NSW)	Unknown	N/A	N/A	N/A	2	1	PENDING			PRJNA613115	3.6.1.1.2	CipR.MSM5	strong			Yes	Present	Present	Present	Present	Absent	Absent	Present	Present	Present	Present	Present	Present	Present	Present	Present	Present	Present	Present
19-0620-0056	2019	224 SAMPLES MALE, 8 FEMALE	AVERAGE 40 [19 - 83]	Australia (NSW)	Unknown	N/A	N/A	N/A	2	1	PENDING			PRJNA613115	3.6.1.1.2	CipR.MSM5	strong			Yes	Present	Absent	Absent	Present	Absent	Absent	Present	Present	Present	Absent	Absent	Present	Present	Present	Present	Present	Present	Present
19-0620-0062	2019	224 SAMPLES MALE, 8 FEMALE	AVERAGE 40 [19 - 83]	Australia (NSW)	Unknown	N/A	N/A	N/A	2	3	PENDING			PRJNA613115	3.6.1.1.2	CipR.MSM5	strong			Yes	Present	Present	Present	Present	Absent	Absent	Present	Present	Present	Present	Present	Present	Present	Present	Present	Present	Present	Present
20-001-0048	2019	224 SAMPLES MALE, 8 FEMALE	AVERAGE 40 [19 - 83]	Australia (NSW)	Unknown	N/A	N/A	N/A	2	5	PENDING			PRJNA613115	3.6.1.1.2	CipR.MSM5	strong			Yes	Present	Present	Present	Present	Absent	Present	Present	Present	Present	Present	Present	Present	Present	Present	Present	Present	Present	Present
20-001-0051	2019	224 SAMPLES MALE, 8 FEMALE	AVERAGE 40 [19 - 83]	Australia (NSW)	Unknown	N/A	N/A	N/A	2	5	PENDING			PRJNA613115	3.6.1.1.2	CipR.MSM5	strong			Yes	Present	Present	Present	Present	Absent	Present	Present	Present	Present	Present	Present	Present	Present	Present	Present	Present	Present	Present
20-001-0052	2019	224 SAMPLES MALE, 8 FEMALE	AVERAGE 40 [19 - 83]	Australia (NSW)	Unknown	N/A	N/A	N/A	2	1	PENDING			PRJNA613115	3.6.1.1.2	CipR.MSM5	strong			Yes	Present	Present	Present	Present	Absent	Absent	Present	Present	Present	Present	Present	Present	Present	Present	Present	Present	Present	Present
S22BD01361	2022	Male	16 - 60	Belgium	Unknown	N/A	N/A	N/A	2	5	ERS13427336			PRJEB40097	3.6.1.1.2	CipR.MSM5	strong			Yes	Present	Absent	Absent	Absent	Present	Present	Present	Present	Present	Absent	Absent	Present	Present	Present	Present	Present	Present	Present
SRR13248013	2020	M	16 - 60	England	Unknown	N/A	1.1.1.1.377.394.4039	Available	1 and 2	5	SRR13248013			PRJNA315192	3.6.1.1.2	CipR.MSM5	strong	1.1.1.1.377	Yes	Yes	Present	Present	Present	Absent	Present	Present	Present	Present	Present	Present	Present	Present	Present	Present	Present	Present	Present	Present
20-001-0107	2020	224 SAMPLES MALE, 8 FEMALE	AVERAGE 40 [19 - 83]	Australia (NSW)	Unknown	N/A	N/A	N/A	2	4	PENDING			PRJNA613115	3.6.1.1.2	CipR.MSM5	strong			Yes	Absent	Absent	Absent	Absent	Absent	Absent	Absent	Present	Present	Absent	Absent	Present	Absent	Present	Present	Present	Present	Present
20-001-0108	2020	224 SAMPLES MALE, 8 FEMALE	AVERAGE 40 [19 - 83]	Australia (NSW)	Unknown	N/A	N/A	N/A	2	5	PENDING			PRJNA613115	3.6.1.1.2	CipR.MSM5	strong			Yes	Present	Present	Present	Absent	Absent	Present	Present	Present	Present	Present	Present	Present	Present	Present	Present	Present	Present	Present
SRR16173636	2021	M	16 - 60	England	Unknown	N/A	1.1.1.1.377.394.4129	Available	1 and 2	5	SRR16173636			PRJNA315192	3.6.1.1.2	CipR.MSM5	strong	1.1.1.1.377	Yes	Yes	Present	Absent	Absent	Absent	Present	Present	Present	Present	Present	Absent	Absent	Present	Present	Present	Present	Present	Present	Present
20-001-0113	2019	224 SAMPLES MALE, 8 FEMALE	AVERAGE 40 [19 - 83]	Australia (NSW)	Unknown	N/A	N/A	N/A	2	5	PENDING			PRJNA613115	3.6.1.1.2	CipR.MSM5	strong			Yes	Present	Present	Present	Absent	Absent	Present	Present	Present	Present	Present	Present	Present	Present	Present	Present	Present	Present	Present
20-001-0146	2020	224 SAMPLES MALE, 8 FEMALE	AVERAGE 40 [19 - 83]	Australia (NSW)	Unknown	N/A	N/A	N/A	2	5	PENDING			PRJNA613115	3.6.1.1.2	CipR.MSM5	strong			Yes	Present	Present	Present	Absent	Absent	Present	Present	Present	Present	Present	Present	Present	Present	Present	Present	Present	Present	Present
20-001-0149	2019	224 SAMPLES MALE, 8 FEMALE	AVERAGE 40 [19 - 83]	Australia (NSW)	Unknown	N/A	N/A	N/A	2	4	PENDING			PRJNA613115	3.6.1.1.2	CipR.MSM5	strong			Yes	Present	Present	Present	Present	Absent	Absent	Present	Present	Present	Present	Present	Present	Present	Present	Present	Present	Present	Present
SRR16194391	2021	M	16 - 60	England	Unknown	N/A	1.1.1.1.377.394.4133	Available	1 and 2	5	SRR16194391			PRJNA315192	3.6.1.1.2	CipR.MSM5	strong	1.1.1.1.377	Yes	Yes	Present	Present	Present	Absent	Present	Absent	Present	Present	Present	Present	Present	Present	Present	Present	Present	Present	Present	Present
20-001-0183	2020	224 SAMPLES MALE, 8 FEMALE	AVERAGE 40 [19 - 83]	Australia (NSW)	Unknown	N/A	N/A	N/A	2	4	PENDING			PRJNA613115	3.6.1.1.2	CipR.MSM5	strong			Yes	Present	Present	Present	Present	Absent	Absent	Present	Present	Present	Present	Present	Present	Present	Present	Present	Present	Present	Present
20-001-0185	2020	224 SAMPLES MALE, 8 FEMALE	AVERAGE 40 [19 - 83]	Australia (NSW)	Unknown	N/A	N/A	N/A	2	1	PENDING			PRJNA613115	3.6.1.1.2	CipR.MSM5	strong			Yes	Present	Present	Present	Present	Absent	Absent	Present	Present	Present	Present	Present	Present	Present	Present	Present	Present	Present	Present
20-001-0190	2020	224 SAMPLES MALE, 8 FEMALE	AVERAGE 40 [19 - 83]	Australia (NSW)	Unknown	N/A	N/A	N/A	2	5	PENDING			PRJNA613115	3.6.1.1.2	CipR.MSM5	strong			Yes	Present	Present	Present	Present	Absent	Present	Present	Present	Present	Present	Present	Present	Present	Present	Present	Present	Present	Present
20-001-0192	2020	224 SAMPLES MALE, 8 FEMALE	AVERAGE 40 [19 - 83]	Australia (NSW)	Unknown	N/A	N/A	N/A	2	4	PENDING			PRJNA613115	3.6.1.1.2	CipR.MSM5	strong			Yes	Absent	Absent	Absent	Absent	Absent	Absent	Absent	Present	Present	Absent	Absent	Present	Absent	Present	Present	Present	Present	Present
20-001-0202	2020	224 SAMPLES MALE, 8 FEMALE	AVERAGE 40 [19 - 83]	Australia (NSW)	Unknown	N/A	N/A	N/A	2	5	PENDING			PRJNA613115	3.6.1.1.2	CipR.MSM5	strong			Yes	Present	Present	Present	Present	Absent	Present	Present	Present	Present	Present	Present	Present	Present	Present	Present	Present	Present	Present
20-001-0245	2020	224 SAMPLES MALE, 8 FEMALE	AVERAGE 40 [19 - 83]	Australia (NSW)	Unknown	N/A	N/A	N/A	2	4	PENDING			PRJNA613115	3.6.1.1.2	CipR.MSM5	strong			Yes	Present	Present	Present	Present	Absent	Absent	Present	Present	Present	Present	Present	Present	Present	Present	Present	Present	Present	Present
20-001-0289	2020	224 SAMPLES MALE, 8 FEMALE	AVERAGE 40 [19 - 83]	Australia (NSW)	Unknown	N/A	N/A	N/A	2	5	PENDING			PRJNA613115	3.6.1.1.2	CipR.MSM5	strong			Yes	Present	Present	Present	Present	Absent	Present	Present	Present	Present	Present	Present	Present	Present	Present	Present	Present	Present	Present
20-001-0294	2020	224 SAMPLES MALE, 8 FEMALE	AVERAGE 40 [19 - 83]	Australia (NSW)	Unknown	N/A	N/A	N/A	2	5	PENDING			PRJNA613115	3.6.1.1.2	CipR.MSM5	strong			Yes	Present	Absent	Absent	Present	Absent	Present	Present	Present	Present	Absent	Absent	Present	Present	Present	Present	Present	Present	Present
20-001-0308	2020	224 SAMPLES MALE, 8 FEMALE	AVERAGE 40 [19 - 83]	Australia (NSW)	Unknown	N/A	N/A	N/A	2	5	PENDING			PRJNA613115	3.6.1.1.2	CipR.MSM5	strong			Yes	Present	Absent	Absent	Absent	Present	Present	Present	Present	Present	Present	Absent	Present	Present	Present	Present	Present	Present	Present
20-001-0369	2020	224 SAMPLES MALE, 8 FEMALE	AVERAGE 40 [19 - 83]	Australia (NSW)	Unknown	N/A	N/A	N/A	2	5	PENDING			PRJNA613115	3.6.1.1.2	CipR.MSM5	strong			Yes	Present	Present	Present	Absent	Present	Present	Present	Present	Present	Present	Present	Present	Present	Present	Present	Present	Present	Present
20-001-0370	2020	224 SAMPLES MALE, 8 FEMALE	AVERAGE 40 [19 - 83]	Australia (NSW)	Unknown	N/A	N/A	N/A	2	5	PENDING			PRJNA613115	3.6.1.1.2	CipR.MSM5	strong			Yes	Present	Absent	Absent	Absent	Present	Present	Present	Present	Present	Present	Absent	Present	Present	Present	Present	Present	Present	Present
20-001-0386	2020	224 SAMPLES MALE, 8 FEMALE	AVERAGE 40 [19 - 83]	Australia (NSW)	Unknown	N/A	N/A	N/A	2	5	PENDING			PRJNA613115	3.6.1.1.2	CipR.MSM5	strong			Yes	Present	Present	Present	Absent	Present	Present	Present	Present	Present	Present	Present	Present	Present	Present	Present	Present	Present	Present
20-001-0404	2020	224 SAMPLES MALE, 8 FEMALE	AVERAGE 40 [19 - 83]	Australia (NSW)	Unknown	N/A	N/A	N/A	2	5	PENDING			PRJNA613115	3.6.1.1.2	CipR.MSM5	strong			Yes	Present	Present	Present	Absent	Absent	Present	Present	Present	Present	Present	Present	Present	Present	Present	Present	Present	Present	Present
20-001-0405	2020	224 SAMPLES MALE, 8 FEMALE	AVERAGE 40 [19 - 83]	Australia (NSW)	Unknown	N/A	N/A	N/A	2	4	PENDING			PRJNA613115	3.6.1.1.2	CipR.MSM5	strong			Yes	Present	Present	Present	Present	Absent	Absent	Present	Present	Present	Present	Present	Present	Present	Present	Present	Present	Present	Present
20-001-0407	2020	224 SAMPLES MALE, 8 FEMALE	AVERAGE 40 [19 - 83]	Australia (NSW)	Unknown	N/A	N/A	N/A	2	5	PENDING			PRJNA613115	3.6.1.1.2	CipR.MSM5	strong			Yes	Present	Present	Present	Absent	Absent	Present	Present	Present	Present	Present	Present	Present	Present	Present	Present	Present	Present	Present
20-001-0410	2020	224 SAMPLES MALE, 8 FEMALE	AVERAGE 40 [19 - 83]	Australia (NSW)	Unknown	N/A	N/A	N/A	2	1	PENDING			PRJNA613115	3.6.1.1.2	CipR.MSM5	strong			Yes	Present	Absent	Absent	Present	Absent	Absent	Present	Present	Present	Absent	Absent	Present	Present	Present	Present	Present	Present	Present
20-001-0411	2020	224 SAMPLES MALE, 8 FEMALE	AVERAGE 40 [19 - 83]	Australia (NSW)	Unknown	N/A	N/A	N/A	2	5	PENDING			PRJNA613115	3.6.1.1.2	CipR.MSM5	strong			Yes	Present	Present	Present	Present	Absent	Present	Present	Present	Present	Present	Present	Present	Present	Present	Present	Present	Present	Present
20-001-0470	2020	224 SAMPLES MALE, 8 FEMALE	AVERAGE 40 [19 - 83]	Australia (NSW)	Unknown	N/A	N/A	N/A	2	4	PENDING			PRJNA613115	3.6.1.1.2	CipR.MSM5	strong			Yes	Absent	Absent	Absent	Absent	Absent	Absent	Absent	Present	Present	Absent	Absent	Present	Absent	Present	Present	Present	Present	Present
20-001-0472	2020	224 SAMPLES MALE, 8 FEMALE	AVERAGE 40 [19 - 83]	Australia (NSW)	Unknown	N/A	N/A	N/A	2	4	PENDING			PRJNA613115	3.6.1.1.2	CipR.MSM5	strong			Yes	Present	Present	Present	Present	Absent	Absent	Present	Present	Present	Present	Present	Present	Present	Present	Present	Present	Present	Present
20-001-0473	2020	224 SAMPLES MALE, 8 FEMALE	AVERAGE 40 [19 - 83]	Australia (NSW)	Unknown	N/A	N/A	N/A	2	4	PENDING			PRJNA613115	3.6.1.1.2	CipR.MSM5	strong			Yes	Present	Present	Present	Present	Absent	Absent	Present	Present	Present	Present	Present	Present	Present	Present	Present	Present	Present	Present
20-001-0475	2020	224 SAMPLES MALE, 8 FEMALE	AVERAGE 40 [19 - 83]	Australia (NSW)	Unknown	N/A	N/A	N/A	2	4	PENDING			PRJNA613115	3.6.1.1.2	CipR.MSM5	strong			Yes	Present	Present	Present	Present	Absent	Absent	Present	Present	Present	Present	Present	Present	Present	Present	Present	Present	Present	Present
20-001-0568	2020	224 SAMPLES MALE, 8 FEMALE	AVERAGE 40 [19 - 83]	Australia (NSW)	Unknown	N/A	N/A	N/A	2	1	PENDING			PRJNA613115	3.6.1.1.2	CipR.MSM5	strong			Yes	Present	Absent	Absent	Present	Absent	Absent	Present	Present	Present	Absent	Absent	Present	Present	Present	Present	Present	Present	Present
20-001-0572	2020	224 SAMPLES MALE, 8 FEMALE	AVERAGE 40 [19 - 83]	Australia (NSW)	Unknown	N/A	N/A	N/A	2	4	PENDING			PRJNA613115	3.6.1.1.2	CipR.MSM5	strong			Yes	Present	Present	Present	Present	Absent	Absent	Present	Present	Present	Present	Present	Present	Present	Present	Present	Present	Present	Present
20-001-0578	2020	224 SAMPLES MALE, 8 FEMALE	AVERAGE 40 [19 - 83]	Australia (NSW)	Unknown	N/A	N/A	N/A	2	5	PENDING			PRJNA613115	3.6.1.1.2	CipR.MSM5	strong			Yes	Present	Present	Present	Present	Absent	Present	Present	Present	Present	Present	Present	Present	Present	Present	Present	Present	Present	Present
20-001-0579	2020	224 SAMPLES MALE, 8 FEMALE	AVERAGE 40 [19 - 83]	Australia (NSW)	Unknown	N/A	N/A	N/A	2	1	PENDING			PRJNA613115	3.6.1.1.2	CipR.MSM5	strong			Yes	Present	Present	Present	Present	Absent	Absent	Present	Present	Present	Present	Present	Present	Present	Present	Present	Present	Present	Present
20-001-0675	2020	224 SAMPLES MALE, 8 FEMALE	AVERAGE 40 [19 - 83]	Australia (NSW)	Unknown	N/A	N/A	N/A	2	4	PENDING			PRJNA613115	3.6.1.1.2	CipR.MSM5	strong			Yes	Present	Present	Present	Present	Absent	Absent	Present	Present	Present	Present	Present	Present	Present	Present	Present	Present	Present	Present
20-001-0796	2020	224 SAMPLES MALE, 8 FEMALE	AVERAGE 40 [19 - 83]	Australia (NSW)	Unknown	N/A	N/A	N/A	2	5	PENDING			PRJNA613115	3.6.1.1.2	CipR.MSM5	strong			Yes	Present	Present	Present	Present	Absent	Present	Present	Present	Present	Present	Present	Present	Present	Present	Present	Present	Present	Present
20-001-0799	2020	224 SAMPLES MALE, 8 FEMALE	AVERAGE 40 [19 - 83]	Australia (NSW)	Unknown	N/A	N/A	N/A	2	5	PENDING			PRJNA613115	3.6.1.1.2	CipR.MSM5	strong			Yes	Present	Present	Present	Absent	Absent	Present	Present	Present	Present	Present	Present	Present	Present	Present	Present	Present	Present	Present
20-001-0800	2020	224 SAMPLES MALE, 8 FEMALE	AVERAGE 40 [19 - 83]	Australia (NSW)	Unknown	N/A	N/A	N/A	2	4	PENDING			PRJNA613115	3.6.1.1.2	CipR.MSM5	strong			Yes	Present	Present	Present	Present	Absent	Absent	Present	Present	Present	Present	Present	Present	Present	Present	Present	Present	Present	Present
20-001-0869	2020	224 SAMPLES MALE, 8 FEMALE	AVERAGE 40 [19 - 83]	Australia (NSW)	Unknown	N/A	N/A	N/A	2	5	PENDING			PRJNA613115	3.6.1.1.2	CipR.MSM5	strong			Yes	Present	Present	Present	Present	Absent	Present	Present	Present	Present	Present	Present	Present	Present	Present	Present	Present	Present	Present
20-001-0874	2020	224 SAMPLES MALE, 8 FEMALE	AVERAGE 40 [19 - 83]	Australia (NSW)	Unknown	N/A	N/A	N/A	2	5	PENDING			PRJNA613115	3.6.1.1.2	CipR.MSM5	strong			Yes	Present	Absent	Absent	Present	Absent	Present	Present	Present	Present	Absent	Absent	Present	Present	Present	Present	Present	Present	Present
20-001-0912	2020	224 SAMPLES MALE, 8 FEMALE	AVERAGE 40 [19 - 83]	Australia (NSW)	Unknown	N/A	N/A	N/A	2	5	PENDING			PRJNA613115	3.6.1.1.2	CipR.MSM5	strong			Yes	Present	Present	Present	Absent	Present	Present	Present	Present	Present	Present	Present	Present	Present	Present	Present	Present	Present	Present
20-001-0913	2020	224 SAMPLES MALE, 8 FEMALE	AVERAGE 40 [19 - 83]	Australia (NSW)	Unknown	N/A	N/A	N/A	2	5	PENDING			PRJNA613115	3.6.1.1.2	CipR.MSM5	strong			Yes	Present	Present	Present	Present	Absent	Present	Present	Present	Present	Present	Present	Present	Present	Present	Present	Present	Present	Present
20-001-0956	2020	224 SAMPLES MALE, 8 FEMALE	AVERAGE 40 [19 - 83]	Australia (NSW)	Unknown	N/A	N/A	N/A	2	4	PENDING			PRJNA613115	3.6.1.1.2	CipR.MSM5	strong			Yes	Absent	Absent	Absent	Absent	Absent	Absent	Absent	Present	Present	Absent	Absent	Present	Absent	Present	Present	Present	Present	Present
SRR16612616	2021	M	16 - 60	England	Unknown	N/A	1.1.1.1.377.394.4129	Available	1 and 2 and S1A	5	SRR16612616	SRR18254048	PENDING	PRJNA315192	3.6.1.1.2	CipR.MSM5	strong	1.1.1.1.377	Yes	Yes	Present	Absent	Absent	Absent	Present	Present	Present	Present	Present	Absent	Absent	Present	Present	Present	Present	Present	Present	Present
20-001-2077	2020	224 SAMPLES MALE, 8 FEMALE	AVERAGE 40 [19 - 83]	Australia (NSW)	Unknown	N/A	N/A	N/A	2	5	PENDING			PRJNA613115	3.6.1.1.2	CipR.MSM5	strong			Yes	Present	Absent	Absent	Present	Absent	Present	Present	Present	Present	Absent	Absent	Present	Present	Present	Present	Present	Present	Present
20-001-2078	2020	224 SAMPLES MALE, 8 FEMALE	AVERAGE 40 [19 - 83]	Australia (NSW)	Unknown	N/A	N/A	N/A	2	5	PENDING			PRJNA613115	3.6.1.1.2	CipR.MSM5	strong			Yes	Present	Present	Present	Present	Absent	Present	Present	Present	Present	Present	Present	Present	Present	Present	Present	Present	Present	Present
SRR12132000	2020	Male	16 - 60	Australia (VIC)	Unknown	N/A	N/A	N/A	2	5	SRR12132000				3.6.1.1.2	CipR.MSM5	strong			Yes	Present	Present	Present	Absent	Present	Present	Present	Present	Present	Present	Present	Present	Present	Present	Present	Present	Present	Present
SRR12132003	2020	Male	16 - 60	Australia (VIC)	Unknown	N/A	N/A	N/A	2	5	SRR12132003				3.6.1.1.2	CipR.MSM5	strong			Yes	Present	Absent	Absent	Absent	Present	Present	Present	Present	Present	Present	Absent	Present	Present	Present	Present	Present	Present	Present
AUSMDU00066619	2021	Male	16 - 60	Australia (VIC)	Unknown	N/A	N/A	N/A	2	5	SRR21009430				3.6.1.1.2	CipR.MSM5	strong			Yes	Absent	Present	Present	Absent	Present	Present	Present	Absent	Absent	Present	Present	Present	Absent	Present	Absent	Present	Present	Present
SRR10312983	2019	MALE	16 - 60	USA	Unknown	N/A	N/A	N/A	2	1	SRR10312983				3.6.1.1.2	CipR.MSM5	strong			Yes	Present	Absent	Absent	Present	Absent	Absent	Absent	Present	Present	Absent	Absent	Present	Present	Present	Present	Present	Present	Present
SRR10771152	2019	MALE	16 - 60	USA	Unknown	N/A	N/A	N/A	2	3	SRR10771152				3.6.1.1.2	CipR.MSM5	strong			Yes	Absent	Present	Present	Absent	Absent	Absent	Absent	Present	Absent	Present	Present	Present	Absent	Present	Absent	Present	Present	Present
SRR11096611	2020	MALE	16 - 60	USA	Unknown	N/A	N/A	N/A	2	5	SRR11096611				3.6.1.1.2	CipR.MSM5	strong			Yes	Present	Present	Present	Absent	Present	Present	Present	Present	Present	Present	Present	Present	Present	Present	Present	Present	Present	Present
SRR11187231	2020	MALE	16 - 60	USA	Unknown	N/A	N/A	N/A	2	5	SRR11187231				3.6.1.1.2	CipR.MSM5	strong			Yes	Present	Present	Present	Absent	Present	Present	Present	Present	Present	Present	Present	Present	Present	Present	Present	Present	Present	Present
SRR11213740	2020	MALE	16 - 60	USA	Unknown	N/A	N/A	N/A	2	5	SRR11213740				3.6.1.1.2	CipR.MSM5	strong			Yes	Present	Present	Present	Absent	Present	Present	Present	Present	Present	Present	Present	Present	Present	Present	Present	Present	Present	Present
SRR11214838	2020	MALE	16 - 60	USA	Unknown	N/A	N/A	N/A	2	5	SRR11214838				3.6.1.1.2	CipR.MSM5	strong			Yes	Present	Present	Present	Absent	Present	Present	Present	Present	Present	Present	Present	Present	Present	Present	Present	Present	Present	Present
SRR11237907	2020	MALE	16 - 60	USA	Unknown	N/A	N/A	N/A	2	5	SRR11237907				3.6.1.1.2	CipR.MSM5	strong			Yes	Present	Present	Present	Absent	Present	Present	Absent	Present	Present	Present	Present	Present	Present	Present	Present	Present	Present	Present
SRR11558319	2020	MALE	16 - 60	USA	Unknown	N/A	N/A	N/A	2	3	SRR11558319				3.6.1.1.2	CipR.MSM5	strong			Yes	Absent	Absent	Absent	Absent	Absent	Absent	Absent	Present	Absent	Absent	Absent	Present	Absent	Present	Absent	Present	Present	Present
SRR12067502	2020	MALE	16 - 60	USA	Unknown	N/A	N/A	N/A	2	3	SRR12067502				3.6.1.1.2	CipR.MSM5	strong			Yes	Absent	Absent	Absent	Absent	Absent	Absent	Absent	Present	Absent	Absent	Absent	Present	Absent	Present	Absent	Present	Present	Present
SRR12121579	2020	FEMALE	16 - 60	USA	Unknown	N/A	N/A	N/A	2	3	SRR12121579				3.6.1.1.2	CipR.MSM5	strong			Yes	Absent	Absent	Absent	Absent	Absent	Absent	Absent	Present	Absent	Absent	Absent	Present	Absent	Present	Absent	Present	Present	Present
SRR12195327	2020	MALE	16 - 60	USA	Unknown	N/A	N/A	N/A	2	3	SRR12195327				3.6.1.1.2	CipR.MSM5	strong			Yes	Absent	Absent	Absent	Absent	Absent	Absent	Absent	Present	Absent	Absent	Absent	Present	Absent	Present	Absent	Present	Present	Present
SRR12235332	2020	MALE	> 60	USA	Unknown	N/A	N/A	N/A	2	3	SRR12235332				3.6.1.1.2	CipR.MSM5	strong			Yes	Absent	Present	Present	Absent	Absent	Absent	Absent	Present	Absent	Present	Present	Present	Absent	Present	Absent	Present	Present	Present
SRR12341412	2020	MALE	16 - 60	USA	Unknown	N/A	N/A	N/A	2	3	SRR12341412				3.6.1.1.2	CipR.MSM5	strong			Yes	Absent	Present	Present	Absent	Absent	Absent	Absent	Present	Absent	Present	Present	Present	Absent	Present	Absent	Present	Present	Present
SRR12341419	2020	MALE	16 - 60	USA	Unknown	N/A	N/A	N/A	2	3	SRR12341419				3.6.1.1.2	CipR.MSM5	strong			Yes	Absent	Present	Present	Absent	Absent	Absent	Absent	Present	Absent	Present	Present	Present	Absent	Present	Absent	Present	Present	Present
SRR12398694	2020	MALE	16 - 60	USA	Unknown	N/A	N/A	N/A	2	3	SRR12398694				3.6.1.1.2	CipR.MSM5	strong			Yes	Absent	Absent	Absent	Absent	Absent	Absent	Absent	Present	Absent	Absent	Absent	Present	Absent	Present	Absent	Present	Present	Present
SRR12398695	2020	MALE	16 - 60	USA	Unknown	N/A	N/A	N/A	2	3	SRR12398695				3.6.1.1.2	CipR.MSM5	strong			Yes	Absent	Present	Absent	Absent	Absent	Absent	Absent	Present	Absent	Present	Absent	Present	Absent	Present	Absent	Present	Present	Present
SRR12515376	2020	MALE	16 - 60	USA	Unknown	N/A	N/A	N/A	2	3	SRR12515376				3.6.1.1.2	CipR.MSM5	strong			Yes	Absent	Absent	Absent	Absent	Absent	Absent	Absent	Present	Absent	Absent	Absent	Present	Absent	Present	Absent	Present	Present	Present
SRR12766679	2020	MALE	16 - 60	USA	Unknown	N/A	N/A	N/A	2	4	SRR12766679				3.6.1.1.2	CipR.MSM5	strong			Yes	Present	Present	Present	Present	Absent	Absent	Present	Present	Present	Present	Present	Present	Present	Present	Present	Present	Present	Present
SRR13483098	2021	MALE	> 60	USA	Unknown	N/A	N/A	N/A	2	3	SRR13483098				3.6.1.1.2	CipR.MSM5	strong			Yes	Absent	Absent	Absent	Absent	Absent	Absent	Absent	Present	Absent	Absent	Absent	Present	Absent	Present	Absent	Present	Present	Present
SRR14083505	2021	MALE	16 - 60	USA	Unknown	N/A	N/A	N/A	2	3	SRR14083505				3.6.1.1.2	CipR.MSM5	strong			Yes	Absent	Absent	Absent	Absent	Absent	Absent	Absent	Present	Absent	Absent	Absent	Present	Absent	Present	Absent	Present	Present	Present
SRR14144078	2021	MALE	16 - 60	USA	Unknown	N/A	N/A	N/A	2	3	SRR14144078				3.6.1.1.2	CipR.MSM5	strong			Yes	Absent	Present	Present	Absent	Absent	Absent	Absent	Absent	Absent	Present	Present	Present	Absent	Present	Absent	Present	Present	Present
SRR14752218	2021	MALE	16 - 60	USA	Unknown	N/A	N/A	N/A	2	3	SRR14752218				3.6.1.1.2	CipR.MSM5	strong			Yes	Absent	Present	Present	Absent	Absent	Absent	Absent	Absent	Absent	Present	Present	Present	Absent	Present	Absent	Present	Present	Present
SRR15178514	2021	MALE	16 - 60	USA	Unknown	N/A	N/A	N/A	2	3	SRR15178514				3.6.1.1.2	CipR.MSM5	strong			Yes	Absent	Present	Present	Absent	Absent	Absent	Absent	Absent	Absent	Present	Present	Present	Absent	Present	Absent	Present	Present	Present
SRR15419007	2021	MALE	16 - 60	USA	Unknown	N/A	N/A	N/A	2	3	SRR15419007				3.6.1.1.2	CipR.MSM5	strong			Yes	Absent	Present	Present	Absent	Absent	Absent	Absent	Present	Absent	Present	Present	Present	Absent	Present	Absent	Present	Present	Present
SRR16343020	2021	MALE	16 - 60	USA	Unknown	N/A	N/A	N/A	2	5	SRR16343020				3.6.1.1.2	CipR.MSM5	strong			Yes	Present	Absent	Absent	Absent	Present	Present	Present	Present	Present	Absent	Absent	Present	Present	Present	Present	Present	Present	Present
SRR17535386	2022	MALE	16 - 60	USA	Unknown	N/A	N/A	N/A	2	5	SRR17535386				3.6.1.1.2	CipR.MSM5	strong			Yes	Present	Present	Present	Absent	Present	Present	Present	Present	Present	Present	Present	Present	Present	Present	Present	Present	Present	Present
SRR18115680	2022	MALE	16 - 60	USA	Unknown	N/A	N/A	N/A	2	5	SRR18115680				3.6.1.1.2	CipR.MSM5	strong			Yes	Present	Absent	Absent	Absent	Present	Present	Present	Present	Present	Absent	Absent	Present	Present	Present	Present	Present	Present	Present
SRR16940985	2021	M	> 60	England	Unknown	N/A	1.1.1.1.377.394.4136	Available	1 and 2	5	SRR16940985			PRJNA315192	3.6.1.1.2	CipR.MSM5	strong	1.1.1.1.377	Yes	Yes	Present	Present	Present	Absent	Present	Present	Present	Present	Present	Present	Present	Present	Present	Present	Present	Present	Present	Present
SRR18778779	2022	MALE	16 - 60	USA	Unknown	N/A	N/A	N/A	2	5	SRR18778779				3.6.1.1.2	CipR.MSM5	strong			Yes	Present	Present	Present	Absent	Present	Present	Present	Present	Present	Present	Present	Present	Present	Present	Present	Present	Present	Present
SRR18902700	2022	MALE	16 - 60	USA	Unknown	N/A	N/A	N/A	2	5	SRR18902700				3.6.1.1.2	CipR.MSM5	strong			Yes	Present	Present	Present	Absent	Present	Present	Present	Present	Present	Present	Present	Present	Present	Present	Present	Present	Present	Present
SRR19207361	2022	MALE	16 - 60	USA	Unknown	N/A	N/A	N/A	2	3	SRR19207361				3.6.1.1.2	CipR.MSM5	strong			Yes	Absent	Present	Present	Absent	Absent	Absent	Absent	Present	Absent	Present	Present	Present	Absent	Present	Absent	Present	Present	Present
S17BD04438	2017	Male	16 - 60	Belgium	Unknown	N/A	N/A	N/A	2	2	ERS6247615			PRJEB40097	3.6.1.1.2	CipR.MSM5	strong			Yes	Present	Present	Present	Present	Absent	Absent	Present	Present	Present	Present	Present	Present	Present	Present	Present	Present	Present	Present
S17BD04470	2017	Male	16 - 60	Belgium	Unknown	N/A	N/A	N/A	2	2	ERS6247631			PRJEB40097	3.6.1.1.2	CipR.MSM5	strong			Yes	Present	Present	Present	Present	Absent	Absent	Present	Present	Present	Present	Present	Present	Present	Present	Present	Present	Present	Present
S17BD04557	2017	Male	16 - 60	Belgium	Unknown	N/A	N/A	N/A	2	2	ERS6247620			PRJEB40097	3.6.1.1.2	CipR.MSM5	strong			Yes	Present	Present	Present	Present	Absent	Absent	Present	Present	Present	Present	Present	Present	Present	Present	Present	Present	Present	Present
S17BD04564	2017	Male	16 - 60	Belgium	Unknown	N/A	N/A	N/A	2	2	ERS6247619			PRJEB40097	3.6.1.1.2	CipR.MSM5	strong			Yes	Present	Present	Present	Present	Absent	Absent	Present	Present	Present	Present	Present	Present	Present	Present	Present	Present	Present	Present
S17BD04750	2017	Male	16 - 60	Belgium	Unknown	N/A	N/A	N/A	2	2	ERS6247621			PRJEB40097	3.6.1.1.2	CipR.MSM5	strong			Yes	Present	Present	Present	Present	Absent	Absent	Present	Present	Present	Present	Present	Present	Present	Present	Present	Present	Present	Present
S17BD05425	2017	Male	16 - 60	Belgium	Unknown	N/A	N/A	N/A	2	2	ERS6247624			PRJEB40097	3.6.1.1.2	CipR.MSM5	strong			Yes	Present	Present	Present	Present	Absent	Absent	Present	Present	Present	Present	Present	Present	Present	Present	Present	Present	Present	Present
S17BD05936	2017	Male	16 - 60	Belgium	Unknown	N/A	N/A	N/A	2	2	ERS6247617			PRJEB40097	3.6.1.1.2	CipR.MSM5	strong			Yes	Present	Present	Present	Present	Absent	Absent	Present	Present	Present	Present	Present	Present	Present	Present	Present	Present	Present	Present
S17BD05959	2017	Male	16 - 60	Belgium	Unknown	N/A	N/A	N/A	2	2	ERS6247614			PRJEB40097	3.6.1.1.2	CipR.MSM5	strong			Yes	Present	Present	Present	Present	Absent	Absent	Present	Present	Present	Present	Present	Present	Present	Present	Present	Present	Present	Present
[truncated: 1,591 more rows]
